# Supplementary material
Source: MDPI journal article supplement (https://www.mdpi.com/2072-4292/9/6/546)
Supplement: s1 [file s1]

Archive with 10 entries (10 files):
- doc.kml
- files/Layer0_Symbol_167545a8_0.png
- files/Layer0_Symbol_16e5ddd0_180.png
- files/Layer0_Symbol_16e5d388_0.png
- files/Layer0_Symbol_16e5dc58_0.png
- files/Layer0_Symbol_16e5cda8_180.png
- files/Layer0_Symbol_16e5d678_0.png
- files/Layer0_Symbol_167542b8_0.png
- files/Layer0_Symbol_16e5cc30_0.png
- files/Layer0_Symbol_16e5d210_0.png
