# Supplementary material
Source: MDPI journal article supplement (https://www.mdpi.com/2072-4292/9/6/546)
Supplement: s1 [file s1 › doc.kml]

<?xml version="1.0" encoding="UTF-8"?>
<kml xmlns="http://www.opengis.net/kml/2.2" xmlns:gx="http://www.google.com/kml/ext/2.2" xmlns:kml="http://www.opengis.net/kml/2.2" xmlns:atom="http://www.w3.org/2005/Atom">
<Folder>
	<name>Irrigation Extent Datasets</name>
	<Document id="ALL_CONTROL_POINTS_Good_only" xsi:schemaLocation="http://www.opengis.net/kml/2.2 http://schemas.opengis.net/kml/2.2.0/ogckml22.xsd http://www.google.com/kml/ext/2.2 http://code.google.com/apis/kml/schema/kml22gx.xsd">
		<name>Threshold Control Points</name>
		<open>1</open>
		<Snippet maxLines="0"></Snippet>
		<Style id="IconStyle00">
			<IconStyle>
				<scale>0.625</scale>
				<Icon>
					<href>files/Layer0_Symbol_167545a8_0.png</href>
				</Icon>
			</IconStyle>
			<LabelStyle>
				<color>00000000</color>
				<scale>0</scale>
			</LabelStyle>
			<PolyStyle>
				<color>ff000000</color>
				<outline>0</outline>
			</PolyStyle>
		</Style>
		<Style id="IconStyle09">
			<IconStyle>
				<scale>0.625</scale>
				<Icon>
					<href>files/Layer0_Symbol_167542b8_0.png</href>
				</Icon>
			</IconStyle>
			<LabelStyle>
				<color>00000000</color>
				<scale>0</scale>
			</LabelStyle>
			<PolyStyle>
				<color>ff000000</color>
				<outline>0</outline>
			</PolyStyle>
		</Style>
		<Folder id="FeatureLayer0">
			<name>ALL_CONTROL_POINTS_Good_only</name>
			<Snippet maxLines="0"></Snippet>
			<Placemark id="ID_00000">
				<name>51</name>
				<Snippet maxLines="0"></Snippet>
				<description><![CDATA[<html xmlns:fo="http://www.w3.org/1999/XSL/Format" xmlns:msxsl="urn:schemas-microsoft-com:xslt">

<head>

<META http-equiv="Content-Type" content="text/html">

<meta http-equiv="content-type" content="text/html; charset=UTF-8">

</head>

<body style="margin:0px 0px 0px 0px;overflow:auto;background:#FFFFFF;">

<table style="font-family:Arial,Verdana,Times;font-size:12px;text-align:left;width:100%;border-collapse:collapse;padding:3px 3px 3px 3px">

<tr style="text-align:center;font-weight:bold;background:#9CBCE2">

<td>51</td>

</tr>

<tr>

<td>

<table style="font-family:Arial,Verdana,Times;font-size:12px;text-align:left;width:100%;border-spacing:0px; padding:3px 3px 3px 3px">

<tr>

<td>FID</td>

<td>0</td>

</tr>

<tr bgcolor="#D4E4F3">

<td>F1_for_irr</td>

<td>1</td>

</tr>

<tr>

<td>Name</td>

<td>51</td>

</tr>

<tr bgcolor="#D4E4F3">

<td>Name_2</td>

<td>51</td>

</tr>

<tr>

<td>Name_1</td>

<td>51</td>

</tr>

<tr bgcolor="#D4E4F3">

<td>F1_for_i_1</td>

<td>1</td>

</tr>

<tr>

<td>notes</td>

<td></td>

</tr>

<tr bgcolor="#D4E4F3">

<td>new_number</td>

<td>1</td>

</tr>

<tr>

<td>elevation</td>

<td>771</td>

</tr>

</table>

</td>

</tr>

</table>

</body>

</html>]]></description>
				<styleUrl>#IconStyle00</styleUrl>
				<Point>
					<coordinates>-116.4531712344649,43.71753385800122,0</coordinates>
				</Point>
			</Placemark>
			<Placemark id="ID_00001">
				<name>53</name>
				<Snippet maxLines="0"></Snippet>
				<description><![CDATA[<html xmlns:fo="http://www.w3.org/1999/XSL/Format" xmlns:msxsl="urn:schemas-microsoft-com:xslt">

<head>

<META http-equiv="Content-Type" content="text/html">

<meta http-equiv="content-type" content="text/html; charset=UTF-8">

</head>

<body style="margin:0px 0px 0px 0px;overflow:auto;background:#FFFFFF;">

<table style="font-family:Arial,Verdana,Times;font-size:12px;text-align:left;width:100%;border-collapse:collapse;padding:3px 3px 3px 3px">

<tr style="text-align:center;font-weight:bold;background:#9CBCE2">

<td>53</td>

</tr>

<tr>

<td>

<table style="font-family:Arial,Verdana,Times;font-size:12px;text-align:left;width:100%;border-spacing:0px; padding:3px 3px 3px 3px">

<tr>

<td>FID</td>

<td>1</td>

</tr>

<tr bgcolor="#D4E4F3">

<td>F1_for_irr</td>

<td>1</td>

</tr>

<tr>

<td>Name</td>

<td>53</td>

</tr>

<tr bgcolor="#D4E4F3">

<td>Name_2</td>

<td>53</td>

</tr>

<tr>

<td>Name_1</td>

<td>53</td>

</tr>

<tr bgcolor="#D4E4F3">

<td>F1_for_i_1</td>

<td>1</td>

</tr>

<tr>

<td>notes</td>

<td></td>

</tr>

<tr bgcolor="#D4E4F3">

<td>new_number</td>

<td>1</td>

</tr>

<tr>

<td>elevation</td>

<td>884</td>

</tr>

</table>

</td>

</tr>

</table>

</body>

</html>]]></description>
				<styleUrl>#IconStyle00</styleUrl>
				<Point>
					<coordinates>-116.2691064427081,43.46275089963439,0</coordinates>
				</Point>
			</Placemark>
			<Placemark id="ID_00002">
				<name>54</name>
				<Snippet maxLines="0"></Snippet>
				<description><![CDATA[<html xmlns:fo="http://www.w3.org/1999/XSL/Format" xmlns:msxsl="urn:schemas-microsoft-com:xslt">

<head>

<META http-equiv="Content-Type" content="text/html">

<meta http-equiv="content-type" content="text/html; charset=UTF-8">

</head>

<body style="margin:0px 0px 0px 0px;overflow:auto;background:#FFFFFF;">

<table style="font-family:Arial,Verdana,Times;font-size:12px;text-align:left;width:100%;border-collapse:collapse;padding:3px 3px 3px 3px">

<tr style="text-align:center;font-weight:bold;background:#9CBCE2">

<td>54</td>

</tr>

<tr>

<td>

<table style="font-family:Arial,Verdana,Times;font-size:12px;text-align:left;width:100%;border-spacing:0px; padding:3px 3px 3px 3px">

<tr>

<td>FID</td>

<td>2</td>

</tr>

<tr bgcolor="#D4E4F3">

<td>F1_for_irr</td>

<td>1</td>

</tr>

<tr>

<td>Name</td>

<td>54</td>

</tr>

<tr bgcolor="#D4E4F3">

<td>Name_2</td>

<td>54</td>

</tr>

<tr>

<td>Name_1</td>

<td>54</td>

</tr>

<tr bgcolor="#D4E4F3">

<td>F1_for_i_1</td>

<td>1</td>

</tr>

<tr>

<td>notes</td>

<td>2014 brown wheat, but irr</td>

</tr>

<tr bgcolor="#D4E4F3">

<td>new_number</td>

<td>1</td>

</tr>

<tr>

<td>elevation</td>

<td>875</td>

</tr>

</table>

</td>

</tr>

</table>

</body>

</html>]]></description>
				<styleUrl>#IconStyle00</styleUrl>
				<Point>
					<coordinates>-116.4088679729786,43.41208984946701,0</coordinates>
				</Point>
			</Placemark>
			<Placemark id="ID_00003">
				<name>55</name>
				<Snippet maxLines="0"></Snippet>
				<description><![CDATA[<html xmlns:fo="http://www.w3.org/1999/XSL/Format" xmlns:msxsl="urn:schemas-microsoft-com:xslt">

<head>

<META http-equiv="Content-Type" content="text/html">

<meta http-equiv="content-type" content="text/html; charset=UTF-8">

</head>

<body style="margin:0px 0px 0px 0px;overflow:auto;background:#FFFFFF;">

<table style="font-family:Arial,Verdana,Times;font-size:12px;text-align:left;width:100%;border-collapse:collapse;padding:3px 3px 3px 3px">

<tr style="text-align:center;font-weight:bold;background:#9CBCE2">

<td>55</td>

</tr>

<tr>

<td>

<table style="font-family:Arial,Verdana,Times;font-size:12px;text-align:left;width:100%;border-spacing:0px; padding:3px 3px 3px 3px">

<tr>

<td>FID</td>

<td>3</td>

</tr>

<tr bgcolor="#D4E4F3">

<td>F1_for_irr</td>

<td>1</td>

</tr>

<tr>

<td>Name</td>

<td>55</td>

</tr>

<tr bgcolor="#D4E4F3">

<td>Name_2</td>

<td>55</td>

</tr>

<tr>

<td>Name_1</td>

<td>55</td>

</tr>

<tr bgcolor="#D4E4F3">

<td>F1_for_i_1</td>

<td>1</td>

</tr>

<tr>

<td>notes</td>

<td></td>

</tr>

<tr bgcolor="#D4E4F3">

<td>new_number</td>

<td>1</td>

</tr>

<tr>

<td>elevation</td>

<td>863</td>

</tr>

</table>

</td>

</tr>

</table>

</body>

</html>]]></description>
				<styleUrl>#IconStyle00</styleUrl>
				<Point>
					<coordinates>-116.299171000841,43.38987759227712,0</coordinates>
				</Point>
			</Placemark>
			<Placemark id="ID_00004">
				<name>56</name>
				<Snippet maxLines="0"></Snippet>
				<description><![CDATA[<html xmlns:fo="http://www.w3.org/1999/XSL/Format" xmlns:msxsl="urn:schemas-microsoft-com:xslt">

<head>

<META http-equiv="Content-Type" content="text/html">

<meta http-equiv="content-type" content="text/html; charset=UTF-8">

</head>

<body style="margin:0px 0px 0px 0px;overflow:auto;background:#FFFFFF;">

<table style="font-family:Arial,Verdana,Times;font-size:12px;text-align:left;width:100%;border-collapse:collapse;padding:3px 3px 3px 3px">

<tr style="text-align:center;font-weight:bold;background:#9CBCE2">

<td>56</td>

</tr>

<tr>

<td>

<table style="font-family:Arial,Verdana,Times;font-size:12px;text-align:left;width:100%;border-spacing:0px; padding:3px 3px 3px 3px">

<tr>

<td>FID</td>

<td>4</td>

</tr>

<tr bgcolor="#D4E4F3">

<td>F1_for_irr</td>

<td>1</td>

</tr>

<tr>

<td>Name</td>

<td>56</td>

</tr>

<tr bgcolor="#D4E4F3">

<td>Name_2</td>

<td>56</td>

</tr>

<tr>

<td>Name_1</td>

<td>56</td>

</tr>

<tr bgcolor="#D4E4F3">

<td>F1_for_i_1</td>

<td>1</td>

</tr>

<tr>

<td>notes</td>

<td></td>

</tr>

<tr bgcolor="#D4E4F3">

<td>new_number</td>

<td>1</td>

</tr>

<tr>

<td>elevation</td>

<td>777</td>

</tr>

</table>

</td>

</tr>

</table>

</body>

</html>]]></description>
				<styleUrl>#IconStyle00</styleUrl>
				<Point>
					<coordinates>-116.4906941832899,43.31650464767142,0</coordinates>
				</Point>
			</Placemark>
			<Placemark id="ID_00005">
				<name>57</name>
				<Snippet maxLines="0"></Snippet>
				<description><![CDATA[<html xmlns:fo="http://www.w3.org/1999/XSL/Format" xmlns:msxsl="urn:schemas-microsoft-com:xslt">

<head>

<META http-equiv="Content-Type" content="text/html">

<meta http-equiv="content-type" content="text/html; charset=UTF-8">

</head>

<body style="margin:0px 0px 0px 0px;overflow:auto;background:#FFFFFF;">

<table style="font-family:Arial,Verdana,Times;font-size:12px;text-align:left;width:100%;border-collapse:collapse;padding:3px 3px 3px 3px">

<tr style="text-align:center;font-weight:bold;background:#9CBCE2">

<td>57</td>

</tr>

<tr>

<td>

<table style="font-family:Arial,Verdana,Times;font-size:12px;text-align:left;width:100%;border-spacing:0px; padding:3px 3px 3px 3px">

<tr>

<td>FID</td>

<td>5</td>

</tr>

<tr bgcolor="#D4E4F3">

<td>F1_for_irr</td>

<td>1</td>

</tr>

<tr>

<td>Name</td>

<td>57</td>

</tr>

<tr bgcolor="#D4E4F3">

<td>Name_2</td>

<td>57</td>

</tr>

<tr>

<td>Name_1</td>

<td>57</td>

</tr>

<tr bgcolor="#D4E4F3">

<td>F1_for_i_1</td>

<td>1</td>

</tr>

<tr>

<td>notes</td>

<td>might be non in recent years</td>

</tr>

<tr bgcolor="#D4E4F3">

<td>new_number</td>

<td>1</td>

</tr>

<tr>

<td>elevation</td>

<td>844</td>

</tr>

</table>

</td>

</tr>

</table>

</body>

</html>]]></description>
				<styleUrl>#IconStyle00</styleUrl>
				<Point>
					<coordinates>-116.4362148545319,43.46525469225031,0</coordinates>
				</Point>
			</Placemark>
			<Placemark id="ID_00006">
				<name>58</name>
				<Snippet maxLines="0"></Snippet>
				<description><![CDATA[<html xmlns:fo="http://www.w3.org/1999/XSL/Format" xmlns:msxsl="urn:schemas-microsoft-com:xslt">

<head>

<META http-equiv="Content-Type" content="text/html">

<meta http-equiv="content-type" content="text/html; charset=UTF-8">

</head>

<body style="margin:0px 0px 0px 0px;overflow:auto;background:#FFFFFF;">

<table style="font-family:Arial,Verdana,Times;font-size:12px;text-align:left;width:100%;border-collapse:collapse;padding:3px 3px 3px 3px">

<tr style="text-align:center;font-weight:bold;background:#9CBCE2">

<td>58</td>

</tr>

<tr>

<td>

<table style="font-family:Arial,Verdana,Times;font-size:12px;text-align:left;width:100%;border-spacing:0px; padding:3px 3px 3px 3px">

<tr>

<td>FID</td>

<td>6</td>

</tr>

<tr bgcolor="#D4E4F3">

<td>F1_for_irr</td>

<td>1</td>

</tr>

<tr>

<td>Name</td>

<td>58</td>

</tr>

<tr bgcolor="#D4E4F3">

<td>Name_2</td>

<td>58</td>

</tr>

<tr>

<td>Name_1</td>

<td>58</td>

</tr>

<tr bgcolor="#D4E4F3">

<td>F1_for_i_1</td>

<td>1</td>

</tr>

<tr>

<td>notes</td>

<td></td>

</tr>

<tr bgcolor="#D4E4F3">

<td>new_number</td>

<td>1</td>

</tr>

<tr>

<td>elevation</td>

<td>842</td>

</tr>

</table>

</td>

</tr>

</table>

</body>

</html>]]></description>
				<styleUrl>#IconStyle00</styleUrl>
				<Point>
					<coordinates>-116.2867766900922,43.5306105945034,0</coordinates>
				</Point>
			</Placemark>
			<Placemark id="ID_00007">
				<name>59</name>
				<Snippet maxLines="0"></Snippet>
				<description><![CDATA[<html xmlns:fo="http://www.w3.org/1999/XSL/Format" xmlns:msxsl="urn:schemas-microsoft-com:xslt">

<head>

<META http-equiv="Content-Type" content="text/html">

<meta http-equiv="content-type" content="text/html; charset=UTF-8">

</head>

<body style="margin:0px 0px 0px 0px;overflow:auto;background:#FFFFFF;">

<table style="font-family:Arial,Verdana,Times;font-size:12px;text-align:left;width:100%;border-collapse:collapse;padding:3px 3px 3px 3px">

<tr style="text-align:center;font-weight:bold;background:#9CBCE2">

<td>59</td>

</tr>

<tr>

<td>

<table style="font-family:Arial,Verdana,Times;font-size:12px;text-align:left;width:100%;border-spacing:0px; padding:3px 3px 3px 3px">

<tr>

<td>FID</td>

<td>7</td>

</tr>

<tr bgcolor="#D4E4F3">

<td>F1_for_irr</td>

<td>1</td>

</tr>

<tr>

<td>Name</td>

<td>59</td>

</tr>

<tr bgcolor="#D4E4F3">

<td>Name_2</td>

<td>59</td>

</tr>

<tr>

<td>Name_1</td>

<td>59</td>

</tr>

<tr bgcolor="#D4E4F3">

<td>F1_for_i_1</td>

<td>1</td>

</tr>

<tr>

<td>notes</td>

<td></td>

</tr>

<tr bgcolor="#D4E4F3">

<td>new_number</td>

<td>1</td>

</tr>

<tr>

<td>elevation</td>

<td>772</td>

</tr>

</table>

</td>

</tr>

</table>

</body>

</html>]]></description>
				<styleUrl>#IconStyle00</styleUrl>
				<Point>
					<coordinates>-116.4509338911861,43.6402958421794,0</coordinates>
				</Point>
			</Placemark>
			<Placemark id="ID_00008">
				<name>60</name>
				<Snippet maxLines="0"></Snippet>
				<description><![CDATA[<html xmlns:fo="http://www.w3.org/1999/XSL/Format" xmlns:msxsl="urn:schemas-microsoft-com:xslt">

<head>

<META http-equiv="Content-Type" content="text/html">

<meta http-equiv="content-type" content="text/html; charset=UTF-8">

</head>

<body style="margin:0px 0px 0px 0px;overflow:auto;background:#FFFFFF;">

<table style="font-family:Arial,Verdana,Times;font-size:12px;text-align:left;width:100%;border-collapse:collapse;padding:3px 3px 3px 3px">

<tr style="text-align:center;font-weight:bold;background:#9CBCE2">

<td>60</td>

</tr>

<tr>

<td>

<table style="font-family:Arial,Verdana,Times;font-size:12px;text-align:left;width:100%;border-spacing:0px; padding:3px 3px 3px 3px">

<tr>

<td>FID</td>

<td>8</td>

</tr>

<tr bgcolor="#D4E4F3">

<td>F1_for_irr</td>

<td>1</td>

</tr>

<tr>

<td>Name</td>

<td>60</td>

</tr>

<tr bgcolor="#D4E4F3">

<td>Name_2</td>

<td>60</td>

</tr>

<tr>

<td>Name_1</td>

<td>60</td>

</tr>

<tr bgcolor="#D4E4F3">

<td>F1_for_i_1</td>

<td>1</td>

</tr>

<tr>

<td>notes</td>

<td></td>

</tr>

<tr bgcolor="#D4E4F3">

<td>new_number</td>

<td>1</td>

</tr>

<tr>

<td>elevation</td>

<td>775</td>

</tr>

</table>

</td>

</tr>

</table>

</body>

</html>]]></description>
				<styleUrl>#IconStyle00</styleUrl>
				<Point>
					<coordinates>-116.4263483599888,43.71581769343186,0</coordinates>
				</Point>
			</Placemark>
			<Placemark id="ID_00009">
				<name>61</name>
				<Snippet maxLines="0"></Snippet>
				<description><![CDATA[<html xmlns:fo="http://www.w3.org/1999/XSL/Format" xmlns:msxsl="urn:schemas-microsoft-com:xslt">

<head>

<META http-equiv="Content-Type" content="text/html">

<meta http-equiv="content-type" content="text/html; charset=UTF-8">

</head>

<body style="margin:0px 0px 0px 0px;overflow:auto;background:#FFFFFF;">

<table style="font-family:Arial,Verdana,Times;font-size:12px;text-align:left;width:100%;border-collapse:collapse;padding:3px 3px 3px 3px">

<tr style="text-align:center;font-weight:bold;background:#9CBCE2">

<td>61</td>

</tr>

<tr>

<td>

<table style="font-family:Arial,Verdana,Times;font-size:12px;text-align:left;width:100%;border-spacing:0px; padding:3px 3px 3px 3px">

<tr>

<td>FID</td>

<td>9</td>

</tr>

<tr bgcolor="#D4E4F3">

<td>F1_for_irr</td>

<td>0</td>

</tr>

<tr>

<td>Name</td>

<td>61</td>

</tr>

<tr bgcolor="#D4E4F3">

<td>Name_2</td>

<td>61</td>

</tr>

<tr>

<td>Name_1</td>

<td>61</td>

</tr>

<tr bgcolor="#D4E4F3">

<td>F1_for_i_1</td>

<td>0</td>

</tr>

<tr>

<td>notes</td>

<td></td>

</tr>

<tr bgcolor="#D4E4F3">

<td>new_number</td>

<td>0</td>

</tr>

<tr>

<td>elevation</td>

<td>854</td>

</tr>

</table>

</td>

</tr>

</table>

</body>

</html>]]></description>
				<styleUrl>#IconStyle09</styleUrl>
				<Point>
					<coordinates>-116.4061683628796,43.74298749307837,0</coordinates>
				</Point>
			</Placemark>
			<Placemark id="ID_00010">
				<name>62</name>
				<Snippet maxLines="0"></Snippet>
				<description><![CDATA[<html xmlns:fo="http://www.w3.org/1999/XSL/Format" xmlns:msxsl="urn:schemas-microsoft-com:xslt">

<head>

<META http-equiv="Content-Type" content="text/html">

<meta http-equiv="content-type" content="text/html; charset=UTF-8">

</head>

<body style="margin:0px 0px 0px 0px;overflow:auto;background:#FFFFFF;">

<table style="font-family:Arial,Verdana,Times;font-size:12px;text-align:left;width:100%;border-collapse:collapse;padding:3px 3px 3px 3px">

<tr style="text-align:center;font-weight:bold;background:#9CBCE2">

<td>62</td>

</tr>

<tr>

<td>

<table style="font-family:Arial,Verdana,Times;font-size:12px;text-align:left;width:100%;border-spacing:0px; padding:3px 3px 3px 3px">

<tr>

<td>FID</td>

<td>10</td>

</tr>

<tr bgcolor="#D4E4F3">

<td>F1_for_irr</td>

<td>0</td>

</tr>

<tr>

<td>Name</td>

<td>62</td>

</tr>

<tr bgcolor="#D4E4F3">

<td>Name_2</td>

<td>62</td>

</tr>

<tr>

<td>Name_1</td>

<td>62</td>

</tr>

<tr bgcolor="#D4E4F3">

<td>F1_for_i_1</td>

<td>0</td>

</tr>

<tr>

<td>notes</td>

<td>pasture</td>

</tr>

<tr bgcolor="#D4E4F3">

<td>new_number</td>

<td>2</td>

</tr>

<tr>

<td>elevation</td>

<td>831</td>

</tr>

</table>

</td>

</tr>

</table>

</body>

</html>]]></description>
				<styleUrl>#IconStyle09</styleUrl>
				<Point>
					<coordinates>-116.3175500848685,43.73370491125269,0</coordinates>
				</Point>
			</Placemark>
			<Placemark id="ID_00011">
				<name>63</name>
				<Snippet maxLines="0"></Snippet>
				<description><![CDATA[<html xmlns:fo="http://www.w3.org/1999/XSL/Format" xmlns:msxsl="urn:schemas-microsoft-com:xslt">

<head>

<META http-equiv="Content-Type" content="text/html">

<meta http-equiv="content-type" content="text/html; charset=UTF-8">

</head>

<body style="margin:0px 0px 0px 0px;overflow:auto;background:#FFFFFF;">

<table style="font-family:Arial,Verdana,Times;font-size:12px;text-align:left;width:100%;border-collapse:collapse;padding:3px 3px 3px 3px">

<tr style="text-align:center;font-weight:bold;background:#9CBCE2">

<td>63</td>

</tr>

<tr>

<td>

<table style="font-family:Arial,Verdana,Times;font-size:12px;text-align:left;width:100%;border-spacing:0px; padding:3px 3px 3px 3px">

<tr>

<td>FID</td>

<td>11</td>

</tr>

<tr bgcolor="#D4E4F3">

<td>F1_for_irr</td>

<td>0</td>

</tr>

<tr>

<td>Name</td>

<td>63</td>

</tr>

<tr bgcolor="#D4E4F3">

<td>Name_2</td>

<td>63</td>

</tr>

<tr>

<td>Name_1</td>

<td>63</td>

</tr>

<tr bgcolor="#D4E4F3">

<td>F1_for_i_1</td>

<td>0</td>

</tr>

<tr>

<td>notes</td>

<td>pasture</td>

</tr>

<tr bgcolor="#D4E4F3">

<td>new_number</td>

<td>2</td>

</tr>

<tr>

<td>elevation</td>

<td>871</td>

</tr>

</table>

</td>

</tr>

</table>

</body>

</html>]]></description>
				<styleUrl>#IconStyle09</styleUrl>
				<Point>
					<coordinates>-116.2481522822021,43.54256381656694,0</coordinates>
				</Point>
			</Placemark>
			<Placemark id="ID_00012">
				<name>65</name>
				<Snippet maxLines="0"></Snippet>
				<description><![CDATA[<html xmlns:fo="http://www.w3.org/1999/XSL/Format" xmlns:msxsl="urn:schemas-microsoft-com:xslt">

<head>

<META http-equiv="Content-Type" content="text/html">

<meta http-equiv="content-type" content="text/html; charset=UTF-8">

</head>

<body style="margin:0px 0px 0px 0px;overflow:auto;background:#FFFFFF;">

<table style="font-family:Arial,Verdana,Times;font-size:12px;text-align:left;width:100%;border-collapse:collapse;padding:3px 3px 3px 3px">

<tr style="text-align:center;font-weight:bold;background:#9CBCE2">

<td>65</td>

</tr>

<tr>

<td>

<table style="font-family:Arial,Verdana,Times;font-size:12px;text-align:left;width:100%;border-spacing:0px; padding:3px 3px 3px 3px">

<tr>

<td>FID</td>

<td>12</td>

</tr>

<tr bgcolor="#D4E4F3">

<td>F1_for_irr</td>

<td>0</td>

</tr>

<tr>

<td>Name</td>

<td>65</td>

</tr>

<tr bgcolor="#D4E4F3">

<td>Name_2</td>

<td>65</td>

</tr>

<tr>

<td>Name_1</td>

<td>65</td>

</tr>

<tr bgcolor="#D4E4F3">

<td>F1_for_i_1</td>

<td>0</td>

</tr>

<tr>

<td>notes</td>

<td></td>

</tr>

<tr bgcolor="#D4E4F3">

<td>new_number</td>

<td>0</td>

</tr>

<tr>

<td>elevation</td>

<td>974</td>

</tr>

</table>

</td>

</tr>

</table>

</body>

</html>]]></description>
				<styleUrl>#IconStyle09</styleUrl>
				<Point>
					<coordinates>-115.9859666263587,43.31424199657096,0</coordinates>
				</Point>
			</Placemark>
			<Placemark id="ID_00013">
				<name>66</name>
				<Snippet maxLines="0"></Snippet>
				<description><![CDATA[<html xmlns:fo="http://www.w3.org/1999/XSL/Format" xmlns:msxsl="urn:schemas-microsoft-com:xslt">

<head>

<META http-equiv="Content-Type" content="text/html">

<meta http-equiv="content-type" content="text/html; charset=UTF-8">

</head>

<body style="margin:0px 0px 0px 0px;overflow:auto;background:#FFFFFF;">

<table style="font-family:Arial,Verdana,Times;font-size:12px;text-align:left;width:100%;border-collapse:collapse;padding:3px 3px 3px 3px">

<tr style="text-align:center;font-weight:bold;background:#9CBCE2">

<td>66</td>

</tr>

<tr>

<td>

<table style="font-family:Arial,Verdana,Times;font-size:12px;text-align:left;width:100%;border-spacing:0px; padding:3px 3px 3px 3px">

<tr>

<td>FID</td>

<td>13</td>

</tr>

<tr bgcolor="#D4E4F3">

<td>F1_for_irr</td>

<td>0</td>

</tr>

<tr>

<td>Name</td>

<td>66</td>

</tr>

<tr bgcolor="#D4E4F3">

<td>Name_2</td>

<td>66</td>

</tr>

<tr>

<td>Name_1</td>

<td>66</td>

</tr>

<tr bgcolor="#D4E4F3">

<td>F1_for_i_1</td>

<td>0</td>

</tr>

<tr>

<td>notes</td>

<td></td>

</tr>

<tr bgcolor="#D4E4F3">

<td>new_number</td>

<td>0</td>

</tr>

<tr>

<td>elevation</td>

<td>951</td>

</tr>

</table>

</td>

</tr>

</table>

</body>

</html>]]></description>
				<styleUrl>#IconStyle09</styleUrl>
				<Point>
					<coordinates>-116.1057575837455,43.53483960156643,0</coordinates>
				</Point>
			</Placemark>
			<Placemark id="ID_00014">
				<name>67</name>
				<Snippet maxLines="0"></Snippet>
				<description><![CDATA[<html xmlns:fo="http://www.w3.org/1999/XSL/Format" xmlns:msxsl="urn:schemas-microsoft-com:xslt">

<head>

<META http-equiv="Content-Type" content="text/html">

<meta http-equiv="content-type" content="text/html; charset=UTF-8">

</head>

<body style="margin:0px 0px 0px 0px;overflow:auto;background:#FFFFFF;">

<table style="font-family:Arial,Verdana,Times;font-size:12px;text-align:left;width:100%;border-collapse:collapse;padding:3px 3px 3px 3px">

<tr style="text-align:center;font-weight:bold;background:#9CBCE2">

<td>67</td>

</tr>

<tr>

<td>

<table style="font-family:Arial,Verdana,Times;font-size:12px;text-align:left;width:100%;border-spacing:0px; padding:3px 3px 3px 3px">

<tr>

<td>FID</td>

<td>14</td>

</tr>

<tr bgcolor="#D4E4F3">

<td>F1_for_irr</td>

<td>0</td>

</tr>

<tr>

<td>Name</td>

<td>67</td>

</tr>

<tr bgcolor="#D4E4F3">

<td>Name_2</td>

<td>67</td>

</tr>

<tr>

<td>Name_1</td>

<td>67</td>

</tr>

<tr bgcolor="#D4E4F3">

<td>F1_for_i_1</td>

<td>0</td>

</tr>

<tr>

<td>notes</td>

<td></td>

</tr>

<tr bgcolor="#D4E4F3">

<td>new_number</td>

<td>0</td>

</tr>

<tr>

<td>elevation</td>

<td>876</td>

</tr>

</table>

</td>

</tr>

</table>

</body>

</html>]]></description>
				<styleUrl>#IconStyle09</styleUrl>
				<Point>
					<coordinates>-116.4237414241274,43.40534041592753,0</coordinates>
				</Point>
			</Placemark>
			<Placemark id="ID_00015">
				<name>68</name>
				<Snippet maxLines="0"></Snippet>
				<description><![CDATA[<html xmlns:fo="http://www.w3.org/1999/XSL/Format" xmlns:msxsl="urn:schemas-microsoft-com:xslt">

<head>

<META http-equiv="Content-Type" content="text/html">

<meta http-equiv="content-type" content="text/html; charset=UTF-8">

</head>

<body style="margin:0px 0px 0px 0px;overflow:auto;background:#FFFFFF;">

<table style="font-family:Arial,Verdana,Times;font-size:12px;text-align:left;width:100%;border-collapse:collapse;padding:3px 3px 3px 3px">

<tr style="text-align:center;font-weight:bold;background:#9CBCE2">

<td>68</td>

</tr>

<tr>

<td>

<table style="font-family:Arial,Verdana,Times;font-size:12px;text-align:left;width:100%;border-spacing:0px; padding:3px 3px 3px 3px">

<tr>

<td>FID</td>

<td>15</td>

</tr>

<tr bgcolor="#D4E4F3">

<td>F1_for_irr</td>

<td>0</td>

</tr>

<tr>

<td>Name</td>

<td>68</td>

</tr>

<tr bgcolor="#D4E4F3">

<td>Name_2</td>

<td>68</td>

</tr>

<tr>

<td>Name_1</td>

<td>68</td>

</tr>

<tr bgcolor="#D4E4F3">

<td>F1_for_i_1</td>

<td>0</td>

</tr>

<tr>

<td>notes</td>

<td></td>

</tr>

<tr bgcolor="#D4E4F3">

<td>new_number</td>

<td>0</td>

</tr>

<tr>

<td>elevation</td>

<td>825</td>

</tr>

</table>

</td>

</tr>

</table>

</body>

</html>]]></description>
				<styleUrl>#IconStyle09</styleUrl>
				<Point>
					<coordinates>-116.466528671461,43.79025830327811,0</coordinates>
				</Point>
			</Placemark>
			<Placemark id="ID_00016">
				<name>69</name>
				<Snippet maxLines="0"></Snippet>
				<description><![CDATA[<html xmlns:fo="http://www.w3.org/1999/XSL/Format" xmlns:msxsl="urn:schemas-microsoft-com:xslt">

<head>

<META http-equiv="Content-Type" content="text/html">

<meta http-equiv="content-type" content="text/html; charset=UTF-8">

</head>

<body style="margin:0px 0px 0px 0px;overflow:auto;background:#FFFFFF;">

<table style="font-family:Arial,Verdana,Times;font-size:12px;text-align:left;width:100%;border-collapse:collapse;padding:3px 3px 3px 3px">

<tr style="text-align:center;font-weight:bold;background:#9CBCE2">

<td>69</td>

</tr>

<tr>

<td>

<table style="font-family:Arial,Verdana,Times;font-size:12px;text-align:left;width:100%;border-spacing:0px; padding:3px 3px 3px 3px">

<tr>

<td>FID</td>

<td>16</td>

</tr>

<tr bgcolor="#D4E4F3">

<td>F1_for_irr</td>

<td>0</td>

</tr>

<tr>

<td>Name</td>

<td>69</td>

</tr>

<tr bgcolor="#D4E4F3">

<td>Name_2</td>

<td>69</td>

</tr>

<tr>

<td>Name_1</td>

<td>69</td>

</tr>

<tr bgcolor="#D4E4F3">

<td>F1_for_i_1</td>

<td>0</td>

</tr>

<tr>

<td>notes</td>

<td></td>

</tr>

<tr bgcolor="#D4E4F3">

<td>new_number</td>

<td>0</td>

</tr>

<tr>

<td>elevation</td>

<td>921</td>

</tr>

</table>

</td>

</tr>

</table>

</body>

</html>]]></description>
				<styleUrl>#IconStyle09</styleUrl>
				<Point>
					<coordinates>-116.2187461357256,43.46934221706971,0</coordinates>
				</Point>
			</Placemark>
			<Placemark id="ID_00017">
				<name>70</name>
				<Snippet maxLines="0"></Snippet>
				<description><![CDATA[<html xmlns:fo="http://www.w3.org/1999/XSL/Format" xmlns:msxsl="urn:schemas-microsoft-com:xslt">

<head>

<META http-equiv="Content-Type" content="text/html">

<meta http-equiv="content-type" content="text/html; charset=UTF-8">

</head>

<body style="margin:0px 0px 0px 0px;overflow:auto;background:#FFFFFF;">

<table style="font-family:Arial,Verdana,Times;font-size:12px;text-align:left;width:100%;border-collapse:collapse;padding:3px 3px 3px 3px">

<tr style="text-align:center;font-weight:bold;background:#9CBCE2">

<td>70</td>

</tr>

<tr>

<td>

<table style="font-family:Arial,Verdana,Times;font-size:12px;text-align:left;width:100%;border-spacing:0px; padding:3px 3px 3px 3px">

<tr>

<td>FID</td>

<td>17</td>

</tr>

<tr bgcolor="#D4E4F3">

<td>F1_for_irr</td>

<td>0</td>

</tr>

<tr>

<td>Name</td>

<td>70</td>

</tr>

<tr bgcolor="#D4E4F3">

<td>Name_2</td>

<td>70</td>

</tr>

<tr>

<td>Name_1</td>

<td>70</td>

</tr>

<tr bgcolor="#D4E4F3">

<td>F1_for_i_1</td>

<td>0</td>

</tr>

<tr>

<td>notes</td>

<td>questionable in 2016 only</td>

</tr>

<tr bgcolor="#D4E4F3">

<td>new_number</td>

<td>0</td>

</tr>

<tr>

<td>elevation</td>

<td>870</td>

</tr>

</table>

</td>

</tr>

</table>

</body>

</html>]]></description>
				<styleUrl>#IconStyle09</styleUrl>
				<Point>
					<coordinates>-116.3259298597752,43.76154961881991,0</coordinates>
				</Point>
			</Placemark>
			<Placemark id="ID_00018">
				<name>71</name>
				<Snippet maxLines="0"></Snippet>
				<description><![CDATA[<html xmlns:fo="http://www.w3.org/1999/XSL/Format" xmlns:msxsl="urn:schemas-microsoft-com:xslt">

<head>

<META http-equiv="Content-Type" content="text/html">

<meta http-equiv="content-type" content="text/html; charset=UTF-8">

</head>

<body style="margin:0px 0px 0px 0px;overflow:auto;background:#FFFFFF;">

<table style="font-family:Arial,Verdana,Times;font-size:12px;text-align:left;width:100%;border-collapse:collapse;padding:3px 3px 3px 3px">

<tr style="text-align:center;font-weight:bold;background:#9CBCE2">

<td>71</td>

</tr>

<tr>

<td>

<table style="font-family:Arial,Verdana,Times;font-size:12px;text-align:left;width:100%;border-spacing:0px; padding:3px 3px 3px 3px">

<tr>

<td>FID</td>

<td>18</td>

</tr>

<tr bgcolor="#D4E4F3">

<td>F1_for_irr</td>

<td>1</td>

</tr>

<tr>

<td>Name</td>

<td>71</td>

</tr>

<tr bgcolor="#D4E4F3">

<td>Name_2</td>

<td>71</td>

</tr>

<tr>

<td>Name_1</td>

<td>71</td>

</tr>

<tr bgcolor="#D4E4F3">

<td>F1_for_i_1</td>

<td>1</td>

</tr>

<tr>

<td>notes</td>

<td></td>

</tr>

<tr bgcolor="#D4E4F3">

<td>new_number</td>

<td>1</td>

</tr>

<tr>

<td>elevation</td>

<td>1534</td>

</tr>

</table>

</td>

</tr>

</table>

</body>

</html>]]></description>
				<styleUrl>#IconStyle00</styleUrl>
				<Point>
					<coordinates>-114.2823749533414,43.4150626879927,0</coordinates>
				</Point>
			</Placemark>
			<Placemark id="ID_00019">
				<name>72</name>
				<Snippet maxLines="0"></Snippet>
				<description><![CDATA[<html xmlns:fo="http://www.w3.org/1999/XSL/Format" xmlns:msxsl="urn:schemas-microsoft-com:xslt">

<head>

<META http-equiv="Content-Type" content="text/html">

<meta http-equiv="content-type" content="text/html; charset=UTF-8">

</head>

<body style="margin:0px 0px 0px 0px;overflow:auto;background:#FFFFFF;">

<table style="font-family:Arial,Verdana,Times;font-size:12px;text-align:left;width:100%;border-collapse:collapse;padding:3px 3px 3px 3px">

<tr style="text-align:center;font-weight:bold;background:#9CBCE2">

<td>72</td>

</tr>

<tr>

<td>

<table style="font-family:Arial,Verdana,Times;font-size:12px;text-align:left;width:100%;border-spacing:0px; padding:3px 3px 3px 3px">

<tr>

<td>FID</td>

<td>19</td>

</tr>

<tr bgcolor="#D4E4F3">

<td>F1_for_irr</td>

<td>1</td>

</tr>

<tr>

<td>Name</td>

<td>72</td>

</tr>

<tr bgcolor="#D4E4F3">

<td>Name_2</td>

<td>72</td>

</tr>

<tr>

<td>Name_1</td>

<td>72</td>

</tr>

<tr bgcolor="#D4E4F3">

<td>F1_for_i_1</td>

<td>1</td>

</tr>

<tr>

<td>notes</td>

<td>brown</td>

</tr>

<tr bgcolor="#D4E4F3">

<td>new_number</td>

<td>1</td>

</tr>

<tr>

<td>elevation</td>

<td>1509</td>

</tr>

</table>

</td>

</tr>

</table>

</body>

</html>]]></description>
				<styleUrl>#IconStyle00</styleUrl>
				<Point>
					<coordinates>-114.2310595762384,43.36293189918786,0</coordinates>
				</Point>
			</Placemark>
			<Placemark id="ID_00020">
				<name>73</name>
				<Snippet maxLines="0"></Snippet>
				<description><![CDATA[<html xmlns:fo="http://www.w3.org/1999/XSL/Format" xmlns:msxsl="urn:schemas-microsoft-com:xslt">

<head>

<META http-equiv="Content-Type" content="text/html">

<meta http-equiv="content-type" content="text/html; charset=UTF-8">

</head>

<body style="margin:0px 0px 0px 0px;overflow:auto;background:#FFFFFF;">

<table style="font-family:Arial,Verdana,Times;font-size:12px;text-align:left;width:100%;border-collapse:collapse;padding:3px 3px 3px 3px">

<tr style="text-align:center;font-weight:bold;background:#9CBCE2">

<td>73</td>

</tr>

<tr>

<td>

<table style="font-family:Arial,Verdana,Times;font-size:12px;text-align:left;width:100%;border-spacing:0px; padding:3px 3px 3px 3px">

<tr>

<td>FID</td>

<td>20</td>

</tr>

<tr bgcolor="#D4E4F3">

<td>F1_for_irr</td>

<td>1</td>

</tr>

<tr>

<td>Name</td>

<td>73</td>

</tr>

<tr bgcolor="#D4E4F3">

<td>Name_2</td>

<td>73</td>

</tr>

<tr>

<td>Name_1</td>

<td>73</td>

</tr>

<tr bgcolor="#D4E4F3">

<td>F1_for_i_1</td>

<td>1</td>

</tr>

<tr>

<td>notes</td>

<td></td>

</tr>

<tr bgcolor="#D4E4F3">

<td>new_number</td>

<td>1</td>

</tr>

<tr>

<td>elevation</td>

<td>1568</td>

</tr>

</table>

</td>

</tr>

</table>

</body>

</html>]]></description>
				<styleUrl>#IconStyle00</styleUrl>
				<Point>
					<coordinates>-114.2468811268625,43.45174100884054,0</coordinates>
				</Point>
			</Placemark>
			<Placemark id="ID_00021">
				<name>74</name>
				<Snippet maxLines="0"></Snippet>
				<description><![CDATA[<html xmlns:fo="http://www.w3.org/1999/XSL/Format" xmlns:msxsl="urn:schemas-microsoft-com:xslt">

<head>

<META http-equiv="Content-Type" content="text/html">

<meta http-equiv="content-type" content="text/html; charset=UTF-8">

</head>

<body style="margin:0px 0px 0px 0px;overflow:auto;background:#FFFFFF;">

<table style="font-family:Arial,Verdana,Times;font-size:12px;text-align:left;width:100%;border-collapse:collapse;padding:3px 3px 3px 3px">

<tr style="text-align:center;font-weight:bold;background:#9CBCE2">

<td>74</td>

</tr>

<tr>

<td>

<table style="font-family:Arial,Verdana,Times;font-size:12px;text-align:left;width:100%;border-spacing:0px; padding:3px 3px 3px 3px">

<tr>

<td>FID</td>

<td>21</td>

</tr>

<tr bgcolor="#D4E4F3">

<td>F1_for_irr</td>

<td>1</td>

</tr>

<tr>

<td>Name</td>

<td>74</td>

</tr>

<tr bgcolor="#D4E4F3">

<td>Name_2</td>

<td>74</td>

</tr>

<tr>

<td>Name_1</td>

<td>74</td>

</tr>

<tr bgcolor="#D4E4F3">

<td>F1_for_i_1</td>

<td>1</td>

</tr>

<tr>

<td>notes</td>

<td></td>

</tr>

<tr bgcolor="#D4E4F3">

<td>new_number</td>

<td>1</td>

</tr>

<tr>

<td>elevation</td>

<td>1540</td>

</tr>

</table>

</td>

</tr>

</table>

</body>

</html>]]></description>
				<styleUrl>#IconStyle00</styleUrl>
				<Point>
					<coordinates>-114.21813655226,43.41692936759631,0</coordinates>
				</Point>
			</Placemark>
			<Placemark id="ID_00022">
				<name>75</name>
				<Snippet maxLines="0"></Snippet>
				<description><![CDATA[<html xmlns:fo="http://www.w3.org/1999/XSL/Format" xmlns:msxsl="urn:schemas-microsoft-com:xslt">

<head>

<META http-equiv="Content-Type" content="text/html">

<meta http-equiv="content-type" content="text/html; charset=UTF-8">

</head>

<body style="margin:0px 0px 0px 0px;overflow:auto;background:#FFFFFF;">

<table style="font-family:Arial,Verdana,Times;font-size:12px;text-align:left;width:100%;border-collapse:collapse;padding:3px 3px 3px 3px">

<tr style="text-align:center;font-weight:bold;background:#9CBCE2">

<td>75</td>

</tr>

<tr>

<td>

<table style="font-family:Arial,Verdana,Times;font-size:12px;text-align:left;width:100%;border-spacing:0px; padding:3px 3px 3px 3px">

<tr>

<td>FID</td>

<td>22</td>

</tr>

<tr bgcolor="#D4E4F3">

<td>F1_for_irr</td>

<td>1</td>

</tr>

<tr>

<td>Name</td>

<td>75</td>

</tr>

<tr bgcolor="#D4E4F3">

<td>Name_2</td>

<td>75</td>

</tr>

<tr>

<td>Name_1</td>

<td>75</td>

</tr>

<tr bgcolor="#D4E4F3">

<td>F1_for_i_1</td>

<td>1</td>

</tr>

<tr>

<td>notes</td>

<td></td>

</tr>

<tr bgcolor="#D4E4F3">

<td>new_number</td>

<td>1</td>

</tr>

<tr>

<td>elevation</td>

<td>1514</td>

</tr>

</table>

</td>

</tr>

</table>

</body>

</html>]]></description>
				<styleUrl>#IconStyle00</styleUrl>
				<Point>
					<coordinates>-114.1906221557878,43.3842385642584,0</coordinates>
				</Point>
			</Placemark>
			<Placemark id="ID_00023">
				<name>76</name>
				<Snippet maxLines="0"></Snippet>
				<description><![CDATA[<html xmlns:fo="http://www.w3.org/1999/XSL/Format" xmlns:msxsl="urn:schemas-microsoft-com:xslt">

<head>

<META http-equiv="Content-Type" content="text/html">

<meta http-equiv="content-type" content="text/html; charset=UTF-8">

</head>

<body style="margin:0px 0px 0px 0px;overflow:auto;background:#FFFFFF;">

<table style="font-family:Arial,Verdana,Times;font-size:12px;text-align:left;width:100%;border-collapse:collapse;padding:3px 3px 3px 3px">

<tr style="text-align:center;font-weight:bold;background:#9CBCE2">

<td>76</td>

</tr>

<tr>

<td>

<table style="font-family:Arial,Verdana,Times;font-size:12px;text-align:left;width:100%;border-spacing:0px; padding:3px 3px 3px 3px">

<tr>

<td>FID</td>

<td>23</td>

</tr>

<tr bgcolor="#D4E4F3">

<td>F1_for_irr</td>

<td>1</td>

</tr>

<tr>

<td>Name</td>

<td>76</td>

</tr>

<tr bgcolor="#D4E4F3">

<td>Name_2</td>

<td>76</td>

</tr>

<tr>

<td>Name_1</td>

<td>76</td>

</tr>

<tr bgcolor="#D4E4F3">

<td>F1_for_i_1</td>

<td>1</td>

</tr>

<tr>

<td>notes</td>

<td></td>

</tr>

<tr bgcolor="#D4E4F3">

<td>new_number</td>

<td>1</td>

</tr>

<tr>

<td>elevation</td>

<td>1489</td>

</tr>

</table>

</td>

</tr>

</table>

</body>

</html>]]></description>
				<styleUrl>#IconStyle00</styleUrl>
				<Point>
					<coordinates>-114.1462947142297,43.30995661550543,0</coordinates>
				</Point>
			</Placemark>
			<Placemark id="ID_00024">
				<name>77</name>
				<Snippet maxLines="0"></Snippet>
				<description><![CDATA[<html xmlns:fo="http://www.w3.org/1999/XSL/Format" xmlns:msxsl="urn:schemas-microsoft-com:xslt">

<head>

<META http-equiv="Content-Type" content="text/html">

<meta http-equiv="content-type" content="text/html; charset=UTF-8">

</head>

<body style="margin:0px 0px 0px 0px;overflow:auto;background:#FFFFFF;">

<table style="font-family:Arial,Verdana,Times;font-size:12px;text-align:left;width:100%;border-collapse:collapse;padding:3px 3px 3px 3px">

<tr style="text-align:center;font-weight:bold;background:#9CBCE2">

<td>77</td>

</tr>

<tr>

<td>

<table style="font-family:Arial,Verdana,Times;font-size:12px;text-align:left;width:100%;border-spacing:0px; padding:3px 3px 3px 3px">

<tr>

<td>FID</td>

<td>24</td>

</tr>

<tr bgcolor="#D4E4F3">

<td>F1_for_irr</td>

<td>0</td>

</tr>

<tr>

<td>Name</td>

<td>77</td>

</tr>

<tr bgcolor="#D4E4F3">

<td>Name_2</td>

<td>77</td>

</tr>

<tr>

<td>Name_1</td>

<td>77</td>

</tr>

<tr bgcolor="#D4E4F3">

<td>F1_for_i_1</td>

<td>0</td>

</tr>

<tr>

<td>notes</td>

<td>pasture</td>

</tr>

<tr bgcolor="#D4E4F3">

<td>new_number</td>

<td>2</td>

</tr>

<tr>

<td>elevation</td>

<td>1522</td>

</tr>

</table>

</td>

</tr>

</table>

</body>

</html>]]></description>
				<styleUrl>#IconStyle09</styleUrl>
				<Point>
					<coordinates>-114.5206926587392,43.35307755358627,0</coordinates>
				</Point>
			</Placemark>
			<Placemark id="ID_00025">
				<name>79</name>
				<Snippet maxLines="0"></Snippet>
				<description><![CDATA[<html xmlns:fo="http://www.w3.org/1999/XSL/Format" xmlns:msxsl="urn:schemas-microsoft-com:xslt">

<head>

<META http-equiv="Content-Type" content="text/html">

<meta http-equiv="content-type" content="text/html; charset=UTF-8">

</head>

<body style="margin:0px 0px 0px 0px;overflow:auto;background:#FFFFFF;">

<table style="font-family:Arial,Verdana,Times;font-size:12px;text-align:left;width:100%;border-collapse:collapse;padding:3px 3px 3px 3px">

<tr style="text-align:center;font-weight:bold;background:#9CBCE2">

<td>79</td>

</tr>

<tr>

<td>

<table style="font-family:Arial,Verdana,Times;font-size:12px;text-align:left;width:100%;border-spacing:0px; padding:3px 3px 3px 3px">

<tr>

<td>FID</td>

<td>25</td>

</tr>

<tr bgcolor="#D4E4F3">

<td>F1_for_irr</td>

<td>0</td>

</tr>

<tr>

<td>Name</td>

<td>79</td>

</tr>

<tr bgcolor="#D4E4F3">

<td>Name_2</td>

<td>79</td>

</tr>

<tr>

<td>Name_1</td>

<td>79</td>

</tr>

<tr bgcolor="#D4E4F3">

<td>F1_for_i_1</td>

<td>0</td>

</tr>

<tr>

<td>notes</td>

<td></td>

</tr>

<tr bgcolor="#D4E4F3">

<td>new_number</td>

<td>0</td>

</tr>

<tr>

<td>elevation</td>

<td>1424</td>

</tr>

</table>

</td>

</tr>

</table>

</body>

</html>]]></description>
				<styleUrl>#IconStyle09</styleUrl>
				<Point>
					<coordinates>-114.0137543820591,43.21615280880513,0</coordinates>
				</Point>
			</Placemark>
			<Placemark id="ID_00026">
				<name>80</name>
				<Snippet maxLines="0"></Snippet>
				<description><![CDATA[<html xmlns:fo="http://www.w3.org/1999/XSL/Format" xmlns:msxsl="urn:schemas-microsoft-com:xslt">

<head>

<META http-equiv="Content-Type" content="text/html">

<meta http-equiv="content-type" content="text/html; charset=UTF-8">

</head>

<body style="margin:0px 0px 0px 0px;overflow:auto;background:#FFFFFF;">

<table style="font-family:Arial,Verdana,Times;font-size:12px;text-align:left;width:100%;border-collapse:collapse;padding:3px 3px 3px 3px">

<tr style="text-align:center;font-weight:bold;background:#9CBCE2">

<td>80</td>

</tr>

<tr>

<td>

<table style="font-family:Arial,Verdana,Times;font-size:12px;text-align:left;width:100%;border-spacing:0px; padding:3px 3px 3px 3px">

<tr>

<td>FID</td>

<td>26</td>

</tr>

<tr bgcolor="#D4E4F3">

<td>F1_for_irr</td>

<td>0</td>

</tr>

<tr>

<td>Name</td>

<td>80</td>

</tr>

<tr bgcolor="#D4E4F3">

<td>Name_2</td>

<td>80</td>

</tr>

<tr>

<td>Name_1</td>

<td>80</td>

</tr>

<tr bgcolor="#D4E4F3">

<td>F1_for_i_1</td>

<td>0</td>

</tr>

<tr>

<td>notes</td>

<td></td>

</tr>

<tr bgcolor="#D4E4F3">

<td>new_number</td>

<td>0</td>

</tr>

<tr>

<td>elevation</td>

<td>1560</td>

</tr>

</table>

</td>

</tr>

</table>

</body>

</html>]]></description>
				<styleUrl>#IconStyle09</styleUrl>
				<Point>
					<coordinates>-114.351196474038,43.29288311236581,0</coordinates>
				</Point>
			</Placemark>
			<Placemark id="ID_00027">
				<name>81</name>
				<Snippet maxLines="0"></Snippet>
				<description><![CDATA[<html xmlns:fo="http://www.w3.org/1999/XSL/Format" xmlns:msxsl="urn:schemas-microsoft-com:xslt">

<head>

<META http-equiv="Content-Type" content="text/html">

<meta http-equiv="content-type" content="text/html; charset=UTF-8">

</head>

<body style="margin:0px 0px 0px 0px;overflow:auto;background:#FFFFFF;">

<table style="font-family:Arial,Verdana,Times;font-size:12px;text-align:left;width:100%;border-collapse:collapse;padding:3px 3px 3px 3px">

<tr style="text-align:center;font-weight:bold;background:#9CBCE2">

<td>81</td>

</tr>

<tr>

<td>

<table style="font-family:Arial,Verdana,Times;font-size:12px;text-align:left;width:100%;border-spacing:0px; padding:3px 3px 3px 3px">

<tr>

<td>FID</td>

<td>27</td>

</tr>

<tr bgcolor="#D4E4F3">

<td>F1_for_irr</td>

<td>0</td>

</tr>

<tr>

<td>Name</td>

<td>81</td>

</tr>

<tr bgcolor="#D4E4F3">

<td>Name_2</td>

<td>81</td>

</tr>

<tr>

<td>Name_1</td>

<td>81</td>

</tr>

<tr bgcolor="#D4E4F3">

<td>F1_for_i_1</td>

<td>0</td>

</tr>

<tr>

<td>notes</td>

<td>pasture</td>

</tr>

<tr bgcolor="#D4E4F3">

<td>new_number</td>

<td>2</td>

</tr>

<tr>

<td>elevation</td>

<td>1525</td>

</tr>

</table>

</td>

</tr>

</table>

</body>

</html>]]></description>
				<styleUrl>#IconStyle09</styleUrl>
				<Point>
					<coordinates>-114.1188461877014,43.2969595773227,0</coordinates>
				</Point>
			</Placemark>
			<Placemark id="ID_00028">
				<name>82</name>
				<Snippet maxLines="0"></Snippet>
				<description><![CDATA[<html xmlns:fo="http://www.w3.org/1999/XSL/Format" xmlns:msxsl="urn:schemas-microsoft-com:xslt">

<head>

<META http-equiv="Content-Type" content="text/html">

<meta http-equiv="content-type" content="text/html; charset=UTF-8">

</head>

<body style="margin:0px 0px 0px 0px;overflow:auto;background:#FFFFFF;">

<table style="font-family:Arial,Verdana,Times;font-size:12px;text-align:left;width:100%;border-collapse:collapse;padding:3px 3px 3px 3px">

<tr style="text-align:center;font-weight:bold;background:#9CBCE2">

<td>82</td>

</tr>

<tr>

<td>

<table style="font-family:Arial,Verdana,Times;font-size:12px;text-align:left;width:100%;border-spacing:0px; padding:3px 3px 3px 3px">

<tr>

<td>FID</td>

<td>28</td>

</tr>

<tr bgcolor="#D4E4F3">

<td>F1_for_irr</td>

<td>0</td>

</tr>

<tr>

<td>Name</td>

<td>82</td>

</tr>

<tr bgcolor="#D4E4F3">

<td>Name_2</td>

<td>82</td>

</tr>

<tr>

<td>Name_1</td>

<td>82</td>

</tr>

<tr bgcolor="#D4E4F3">

<td>F1_for_i_1</td>

<td>0</td>

</tr>

<tr>

<td>notes</td>

<td></td>

</tr>

<tr bgcolor="#D4E4F3">

<td>new_number</td>

<td>0</td>

</tr>

<tr>

<td>elevation</td>

<td>1516</td>

</tr>

</table>

</td>

</tr>

</table>

</body>

</html>]]></description>
				<styleUrl>#IconStyle09</styleUrl>
				<Point>
					<coordinates>-114.4719625699166,43.34514908995857,0</coordinates>
				</Point>
			</Placemark>
			<Placemark id="ID_00029">
				<name>83</name>
				<Snippet maxLines="0"></Snippet>
				<description><![CDATA[<html xmlns:fo="http://www.w3.org/1999/XSL/Format" xmlns:msxsl="urn:schemas-microsoft-com:xslt">

<head>

<META http-equiv="Content-Type" content="text/html">

<meta http-equiv="content-type" content="text/html; charset=UTF-8">

</head>

<body style="margin:0px 0px 0px 0px;overflow:auto;background:#FFFFFF;">

<table style="font-family:Arial,Verdana,Times;font-size:12px;text-align:left;width:100%;border-collapse:collapse;padding:3px 3px 3px 3px">

<tr style="text-align:center;font-weight:bold;background:#9CBCE2">

<td>83</td>

</tr>

<tr>

<td>

<table style="font-family:Arial,Verdana,Times;font-size:12px;text-align:left;width:100%;border-spacing:0px; padding:3px 3px 3px 3px">

<tr>

<td>FID</td>

<td>29</td>

</tr>

<tr bgcolor="#D4E4F3">

<td>F1_for_irr</td>

<td>0</td>

</tr>

<tr>

<td>Name</td>

<td>83</td>

</tr>

<tr bgcolor="#D4E4F3">

<td>Name_2</td>

<td>83</td>

</tr>

<tr>

<td>Name_1</td>

<td>83</td>

</tr>

<tr bgcolor="#D4E4F3">

<td>F1_for_i_1</td>

<td>0</td>

</tr>

<tr>

<td>notes</td>

<td></td>

</tr>

<tr bgcolor="#D4E4F3">

<td>new_number</td>

<td>0</td>

</tr>

<tr>

<td>elevation</td>

<td>1494</td>

</tr>

</table>

</td>

</tr>

</table>

</body>

</html>]]></description>
				<styleUrl>#IconStyle09</styleUrl>
				<Point>
					<coordinates>-114.4250030933181,43.34174175837552,0</coordinates>
				</Point>
			</Placemark>
			<Placemark id="ID_00030">
				<name>84</name>
				<Snippet maxLines="0"></Snippet>
				<description><![CDATA[<html xmlns:fo="http://www.w3.org/1999/XSL/Format" xmlns:msxsl="urn:schemas-microsoft-com:xslt">

<head>

<META http-equiv="Content-Type" content="text/html">

<meta http-equiv="content-type" content="text/html; charset=UTF-8">

</head>

<body style="margin:0px 0px 0px 0px;overflow:auto;background:#FFFFFF;">

<table style="font-family:Arial,Verdana,Times;font-size:12px;text-align:left;width:100%;border-collapse:collapse;padding:3px 3px 3px 3px">

<tr style="text-align:center;font-weight:bold;background:#9CBCE2">

<td>84</td>

</tr>

<tr>

<td>

<table style="font-family:Arial,Verdana,Times;font-size:12px;text-align:left;width:100%;border-spacing:0px; padding:3px 3px 3px 3px">

<tr>

<td>FID</td>

<td>30</td>

</tr>

<tr bgcolor="#D4E4F3">

<td>F1_for_irr</td>

<td>1</td>

</tr>

<tr>

<td>Name</td>

<td>84</td>

</tr>

<tr bgcolor="#D4E4F3">

<td>Name_2</td>

<td>84</td>

</tr>

<tr>

<td>Name_1</td>

<td>84</td>

</tr>

<tr bgcolor="#D4E4F3">

<td>F1_for_i_1</td>

<td>1</td>

</tr>

<tr>

<td>notes</td>

<td>might be non in early years</td>

</tr>

<tr bgcolor="#D4E4F3">

<td>new_number</td>

<td>1</td>

</tr>

<tr>

<td>elevation</td>

<td>1541</td>

</tr>

</table>

</td>

</tr>

</table>

</body>

</html>]]></description>
				<styleUrl>#IconStyle00</styleUrl>
				<Point>
					<coordinates>-114.6977820847754,43.36479509211983,0</coordinates>
				</Point>
			</Placemark>
			<Placemark id="ID_00031">
				<name>85</name>
				<Snippet maxLines="0"></Snippet>
				<description><![CDATA[<html xmlns:fo="http://www.w3.org/1999/XSL/Format" xmlns:msxsl="urn:schemas-microsoft-com:xslt">

<head>

<META http-equiv="Content-Type" content="text/html">

<meta http-equiv="content-type" content="text/html; charset=UTF-8">

</head>

<body style="margin:0px 0px 0px 0px;overflow:auto;background:#FFFFFF;">

<table style="font-family:Arial,Verdana,Times;font-size:12px;text-align:left;width:100%;border-collapse:collapse;padding:3px 3px 3px 3px">

<tr style="text-align:center;font-weight:bold;background:#9CBCE2">

<td>85</td>

</tr>

<tr>

<td>

<table style="font-family:Arial,Verdana,Times;font-size:12px;text-align:left;width:100%;border-spacing:0px; padding:3px 3px 3px 3px">

<tr>

<td>FID</td>

<td>31</td>

</tr>

<tr bgcolor="#D4E4F3">

<td>F1_for_irr</td>

<td>1</td>

</tr>

<tr>

<td>Name</td>

<td>85</td>

</tr>

<tr bgcolor="#D4E4F3">

<td>Name_2</td>

<td>85</td>

</tr>

<tr>

<td>Name_1</td>

<td>85</td>

</tr>

<tr bgcolor="#D4E4F3">

<td>F1_for_i_1</td>

<td>1</td>

</tr>

<tr>

<td>notes</td>

<td></td>

</tr>

<tr bgcolor="#D4E4F3">

<td>new_number</td>

<td>1</td>

</tr>

<tr>

<td>elevation</td>

<td>1527</td>

</tr>

</table>

</td>

</tr>

</table>

</body>

</html>]]></description>
				<styleUrl>#IconStyle00</styleUrl>
				<Point>
					<coordinates>-114.6978617781984,43.33136443362179,0</coordinates>
				</Point>
			</Placemark>
			<Placemark id="ID_00032">
				<name>86</name>
				<Snippet maxLines="0"></Snippet>
				<description><![CDATA[<html xmlns:fo="http://www.w3.org/1999/XSL/Format" xmlns:msxsl="urn:schemas-microsoft-com:xslt">

<head>

<META http-equiv="Content-Type" content="text/html">

<meta http-equiv="content-type" content="text/html; charset=UTF-8">

</head>

<body style="margin:0px 0px 0px 0px;overflow:auto;background:#FFFFFF;">

<table style="font-family:Arial,Verdana,Times;font-size:12px;text-align:left;width:100%;border-collapse:collapse;padding:3px 3px 3px 3px">

<tr style="text-align:center;font-weight:bold;background:#9CBCE2">

<td>86</td>

</tr>

<tr>

<td>

<table style="font-family:Arial,Verdana,Times;font-size:12px;text-align:left;width:100%;border-spacing:0px; padding:3px 3px 3px 3px">

<tr>

<td>FID</td>

<td>32</td>

</tr>

<tr bgcolor="#D4E4F3">

<td>F1_for_irr</td>

<td>1</td>

</tr>

<tr>

<td>Name</td>

<td>86</td>

</tr>

<tr bgcolor="#D4E4F3">

<td>Name_2</td>

<td>86</td>

</tr>

<tr>

<td>Name_1</td>

<td>86</td>

</tr>

<tr bgcolor="#D4E4F3">

<td>F1_for_i_1</td>

<td>1</td>

</tr>

<tr>

<td>notes</td>

<td></td>

</tr>

<tr bgcolor="#D4E4F3">

<td>new_number</td>

<td>1</td>

</tr>

<tr>

<td>elevation</td>

<td>1561</td>

</tr>

</table>

</td>

</tr>

</table>

</body>

</html>]]></description>
				<styleUrl>#IconStyle00</styleUrl>
				<Point>
					<coordinates>-114.7421484795686,43.3807798903797,0</coordinates>
				</Point>
			</Placemark>
			<Placemark id="ID_00033">
				<name>87</name>
				<Snippet maxLines="0"></Snippet>
				<description><![CDATA[<html xmlns:fo="http://www.w3.org/1999/XSL/Format" xmlns:msxsl="urn:schemas-microsoft-com:xslt">

<head>

<META http-equiv="Content-Type" content="text/html">

<meta http-equiv="content-type" content="text/html; charset=UTF-8">

</head>

<body style="margin:0px 0px 0px 0px;overflow:auto;background:#FFFFFF;">

<table style="font-family:Arial,Verdana,Times;font-size:12px;text-align:left;width:100%;border-collapse:collapse;padding:3px 3px 3px 3px">

<tr style="text-align:center;font-weight:bold;background:#9CBCE2">

<td>87</td>

</tr>

<tr>

<td>

<table style="font-family:Arial,Verdana,Times;font-size:12px;text-align:left;width:100%;border-spacing:0px; padding:3px 3px 3px 3px">

<tr>

<td>FID</td>

<td>33</td>

</tr>

<tr bgcolor="#D4E4F3">

<td>F1_for_irr</td>

<td>1</td>

</tr>

<tr>

<td>Name</td>

<td>87</td>

</tr>

<tr bgcolor="#D4E4F3">

<td>Name_2</td>

<td>87</td>

</tr>

<tr>

<td>Name_1</td>

<td>87</td>

</tr>

<tr bgcolor="#D4E4F3">

<td>F1_for_i_1</td>

<td>1</td>

</tr>

<tr>

<td>notes</td>

<td></td>

</tr>

<tr bgcolor="#D4E4F3">

<td>new_number</td>

<td>1</td>

</tr>

<tr>

<td>elevation</td>

<td>1550</td>

</tr>

</table>

</td>

</tr>

</table>

</body>

</html>]]></description>
				<styleUrl>#IconStyle00</styleUrl>
				<Point>
					<coordinates>-114.944707851686,43.33888706288769,0</coordinates>
				</Point>
			</Placemark>
			<Placemark id="ID_00034">
				<name>88</name>
				<Snippet maxLines="0"></Snippet>
				<description><![CDATA[<html xmlns:fo="http://www.w3.org/1999/XSL/Format" xmlns:msxsl="urn:schemas-microsoft-com:xslt">

<head>

<META http-equiv="Content-Type" content="text/html">

<meta http-equiv="content-type" content="text/html; charset=UTF-8">

</head>

<body style="margin:0px 0px 0px 0px;overflow:auto;background:#FFFFFF;">

<table style="font-family:Arial,Verdana,Times;font-size:12px;text-align:left;width:100%;border-collapse:collapse;padding:3px 3px 3px 3px">

<tr style="text-align:center;font-weight:bold;background:#9CBCE2">

<td>88</td>

</tr>

<tr>

<td>

<table style="font-family:Arial,Verdana,Times;font-size:12px;text-align:left;width:100%;border-spacing:0px; padding:3px 3px 3px 3px">

<tr>

<td>FID</td>

<td>34</td>

</tr>

<tr bgcolor="#D4E4F3">

<td>F1_for_irr</td>

<td>1</td>

</tr>

<tr>

<td>Name</td>

<td>88</td>

</tr>

<tr bgcolor="#D4E4F3">

<td>Name_2</td>

<td>88</td>

</tr>

<tr>

<td>Name_1</td>

<td>88</td>

</tr>

<tr bgcolor="#D4E4F3">

<td>F1_for_i_1</td>

<td>1</td>

</tr>

<tr>

<td>notes</td>

<td></td>

</tr>

<tr bgcolor="#D4E4F3">

<td>new_number</td>

<td>1</td>

</tr>

<tr>

<td>elevation</td>

<td>1553</td>

</tr>

</table>

</td>

</tr>

</table>

</body>

</html>]]></description>
				<styleUrl>#IconStyle00</styleUrl>
				<Point>
					<coordinates>-115.0229910793748,43.3172977166164,0</coordinates>
				</Point>
			</Placemark>
			<Placemark id="ID_00035">
				<name>89</name>
				<Snippet maxLines="0"></Snippet>
				<description><![CDATA[<html xmlns:fo="http://www.w3.org/1999/XSL/Format" xmlns:msxsl="urn:schemas-microsoft-com:xslt">

<head>

<META http-equiv="Content-Type" content="text/html">

<meta http-equiv="content-type" content="text/html; charset=UTF-8">

</head>

<body style="margin:0px 0px 0px 0px;overflow:auto;background:#FFFFFF;">

<table style="font-family:Arial,Verdana,Times;font-size:12px;text-align:left;width:100%;border-collapse:collapse;padding:3px 3px 3px 3px">

<tr style="text-align:center;font-weight:bold;background:#9CBCE2">

<td>89</td>

</tr>

<tr>

<td>

<table style="font-family:Arial,Verdana,Times;font-size:12px;text-align:left;width:100%;border-spacing:0px; padding:3px 3px 3px 3px">

<tr>

<td>FID</td>

<td>35</td>

</tr>

<tr bgcolor="#D4E4F3">

<td>F1_for_irr</td>

<td>1</td>

</tr>

<tr>

<td>Name</td>

<td>89</td>

</tr>

<tr bgcolor="#D4E4F3">

<td>Name_2</td>

<td>89</td>

</tr>

<tr>

<td>Name_1</td>

<td>89</td>

</tr>

<tr bgcolor="#D4E4F3">

<td>F1_for_i_1</td>

<td>1</td>

</tr>

<tr>

<td>notes</td>

<td></td>

</tr>

<tr bgcolor="#D4E4F3">

<td>new_number</td>

<td>1</td>

</tr>

<tr>

<td>elevation</td>

<td>1548</td>

</tr>

</table>

</td>

</tr>

</table>

</body>

</html>]]></description>
				<styleUrl>#IconStyle00</styleUrl>
				<Point>
					<coordinates>-115.0792880620944,43.26124192037838,0</coordinates>
				</Point>
			</Placemark>
			<Placemark id="ID_00036">
				<name>90</name>
				<Snippet maxLines="0"></Snippet>
				<description><![CDATA[<html xmlns:fo="http://www.w3.org/1999/XSL/Format" xmlns:msxsl="urn:schemas-microsoft-com:xslt">

<head>

<META http-equiv="Content-Type" content="text/html">

<meta http-equiv="content-type" content="text/html; charset=UTF-8">

</head>

<body style="margin:0px 0px 0px 0px;overflow:auto;background:#FFFFFF;">

<table style="font-family:Arial,Verdana,Times;font-size:12px;text-align:left;width:100%;border-collapse:collapse;padding:3px 3px 3px 3px">

<tr style="text-align:center;font-weight:bold;background:#9CBCE2">

<td>90</td>

</tr>

<tr>

<td>

<table style="font-family:Arial,Verdana,Times;font-size:12px;text-align:left;width:100%;border-spacing:0px; padding:3px 3px 3px 3px">

<tr>

<td>FID</td>

<td>36</td>

</tr>

<tr bgcolor="#D4E4F3">

<td>F1_for_irr</td>

<td>1</td>

</tr>

<tr>

<td>Name</td>

<td>90</td>

</tr>

<tr bgcolor="#D4E4F3">

<td>Name_2</td>

<td>90</td>

</tr>

<tr>

<td>Name_1</td>

<td>90</td>

</tr>

<tr bgcolor="#D4E4F3">

<td>F1_for_i_1</td>

<td>1</td>

</tr>

<tr>

<td>notes</td>

<td></td>

</tr>

<tr bgcolor="#D4E4F3">

<td>new_number</td>

<td>1</td>

</tr>

<tr>

<td>elevation</td>

<td>1548</td>

</tr>

</table>

</td>

</tr>

</table>

</body>

</html>]]></description>
				<styleUrl>#IconStyle00</styleUrl>
				<Point>
					<coordinates>-115.0762264002282,43.29389421294764,0</coordinates>
				</Point>
			</Placemark>
			<Placemark id="ID_00037">
				<name>91</name>
				<Snippet maxLines="0"></Snippet>
				<description><![CDATA[<html xmlns:fo="http://www.w3.org/1999/XSL/Format" xmlns:msxsl="urn:schemas-microsoft-com:xslt">

<head>

<META http-equiv="Content-Type" content="text/html">

<meta http-equiv="content-type" content="text/html; charset=UTF-8">

</head>

<body style="margin:0px 0px 0px 0px;overflow:auto;background:#FFFFFF;">

<table style="font-family:Arial,Verdana,Times;font-size:12px;text-align:left;width:100%;border-collapse:collapse;padding:3px 3px 3px 3px">

<tr style="text-align:center;font-weight:bold;background:#9CBCE2">

<td>91</td>

</tr>

<tr>

<td>

<table style="font-family:Arial,Verdana,Times;font-size:12px;text-align:left;width:100%;border-spacing:0px; padding:3px 3px 3px 3px">

<tr>

<td>FID</td>

<td>37</td>

</tr>

<tr bgcolor="#D4E4F3">

<td>F1_for_irr</td>

<td>1</td>

</tr>

<tr>

<td>Name</td>

<td>91</td>

</tr>

<tr bgcolor="#D4E4F3">

<td>Name_2</td>

<td>91</td>

</tr>

<tr>

<td>Name_1</td>

<td>91</td>

</tr>

<tr bgcolor="#D4E4F3">

<td>F1_for_i_1</td>

<td>1</td>

</tr>

<tr>

<td>notes</td>

<td></td>

</tr>

<tr bgcolor="#D4E4F3">

<td>new_number</td>

<td>1</td>

</tr>

<tr>

<td>elevation</td>

<td>1536</td>

</tr>

</table>

</td>

</tr>

</table>

</body>

</html>]]></description>
				<styleUrl>#IconStyle00</styleUrl>
				<Point>
					<coordinates>-114.7471604552907,43.33143716539291,0</coordinates>
				</Point>
			</Placemark>
			<Placemark id="ID_00038">
				<name>92</name>
				<Snippet maxLines="0"></Snippet>
				<description><![CDATA[<html xmlns:fo="http://www.w3.org/1999/XSL/Format" xmlns:msxsl="urn:schemas-microsoft-com:xslt">

<head>

<META http-equiv="Content-Type" content="text/html">

<meta http-equiv="content-type" content="text/html; charset=UTF-8">

</head>

<body style="margin:0px 0px 0px 0px;overflow:auto;background:#FFFFFF;">

<table style="font-family:Arial,Verdana,Times;font-size:12px;text-align:left;width:100%;border-collapse:collapse;padding:3px 3px 3px 3px">

<tr style="text-align:center;font-weight:bold;background:#9CBCE2">

<td>92</td>

</tr>

<tr>

<td>

<table style="font-family:Arial,Verdana,Times;font-size:12px;text-align:left;width:100%;border-spacing:0px; padding:3px 3px 3px 3px">

<tr>

<td>FID</td>

<td>38</td>

</tr>

<tr bgcolor="#D4E4F3">

<td>F1_for_irr</td>

<td>1</td>

</tr>

<tr>

<td>Name</td>

<td>92</td>

</tr>

<tr bgcolor="#D4E4F3">

<td>Name_2</td>

<td>92</td>

</tr>

<tr>

<td>Name_1</td>

<td>92</td>

</tr>

<tr bgcolor="#D4E4F3">

<td>F1_for_i_1</td>

<td>1</td>

</tr>

<tr>

<td>notes</td>

<td></td>

</tr>

<tr bgcolor="#D4E4F3">

<td>new_number</td>

<td>1</td>

</tr>

<tr>

<td>elevation</td>

<td>1553</td>

</tr>

</table>

</td>

</tr>

</table>

</body>

</html>]]></description>
				<styleUrl>#IconStyle00</styleUrl>
				<Point>
					<coordinates>-114.963955200572,43.34618270776582,0</coordinates>
				</Point>
			</Placemark>
			<Placemark id="ID_00039">
				<name>93</name>
				<Snippet maxLines="0"></Snippet>
				<description><![CDATA[<html xmlns:fo="http://www.w3.org/1999/XSL/Format" xmlns:msxsl="urn:schemas-microsoft-com:xslt">

<head>

<META http-equiv="Content-Type" content="text/html">

<meta http-equiv="content-type" content="text/html; charset=UTF-8">

</head>

<body style="margin:0px 0px 0px 0px;overflow:auto;background:#FFFFFF;">

<table style="font-family:Arial,Verdana,Times;font-size:12px;text-align:left;width:100%;border-collapse:collapse;padding:3px 3px 3px 3px">

<tr style="text-align:center;font-weight:bold;background:#9CBCE2">

<td>93</td>

</tr>

<tr>

<td>

<table style="font-family:Arial,Verdana,Times;font-size:12px;text-align:left;width:100%;border-spacing:0px; padding:3px 3px 3px 3px">

<tr>

<td>FID</td>

<td>39</td>

</tr>

<tr bgcolor="#D4E4F3">

<td>F1_for_irr</td>

<td>1</td>

</tr>

<tr>

<td>Name</td>

<td>93</td>

</tr>

<tr bgcolor="#D4E4F3">

<td>Name_2</td>

<td>93</td>

</tr>

<tr>

<td>Name_1</td>

<td>93</td>

</tr>

<tr bgcolor="#D4E4F3">

<td>F1_for_i_1</td>

<td>1</td>

</tr>

<tr>

<td>notes</td>

<td></td>

</tr>

<tr bgcolor="#D4E4F3">

<td>new_number</td>

<td>1</td>

</tr>

<tr>

<td>elevation</td>

<td>1536</td>

</tr>

</table>

</td>

</tr>

</table>

</body>

</html>]]></description>
				<styleUrl>#IconStyle00</styleUrl>
				<Point>
					<coordinates>-114.5517597640019,43.36816266557463,0</coordinates>
				</Point>
			</Placemark>
			<Placemark id="ID_00040">
				<name>94</name>
				<Snippet maxLines="0"></Snippet>
				<description><![CDATA[<html xmlns:fo="http://www.w3.org/1999/XSL/Format" xmlns:msxsl="urn:schemas-microsoft-com:xslt">

<head>

<META http-equiv="Content-Type" content="text/html">

<meta http-equiv="content-type" content="text/html; charset=UTF-8">

</head>

<body style="margin:0px 0px 0px 0px;overflow:auto;background:#FFFFFF;">

<table style="font-family:Arial,Verdana,Times;font-size:12px;text-align:left;width:100%;border-collapse:collapse;padding:3px 3px 3px 3px">

<tr style="text-align:center;font-weight:bold;background:#9CBCE2">

<td>94</td>

</tr>

<tr>

<td>

<table style="font-family:Arial,Verdana,Times;font-size:12px;text-align:left;width:100%;border-spacing:0px; padding:3px 3px 3px 3px">

<tr>

<td>FID</td>

<td>40</td>

</tr>

<tr bgcolor="#D4E4F3">

<td>F1_for_irr</td>

<td>0</td>

</tr>

<tr>

<td>Name</td>

<td>94</td>

</tr>

<tr bgcolor="#D4E4F3">

<td>Name_2</td>

<td>94</td>

</tr>

<tr>

<td>Name_1</td>

<td>94</td>

</tr>

<tr bgcolor="#D4E4F3">

<td>F1_for_i_1</td>

<td>0</td>

</tr>

<tr>

<td>notes</td>

<td>wheat</td>

</tr>

<tr bgcolor="#D4E4F3">

<td>new_number</td>

<td>2</td>

</tr>

<tr>

<td>elevation</td>

<td>1533</td>

</tr>

</table>

</td>

</tr>

</table>

</body>

</html>]]></description>
				<styleUrl>#IconStyle09</styleUrl>
				<Point>
					<coordinates>-114.7867672726915,43.31139315207236,0</coordinates>
				</Point>
			</Placemark>
			<Placemark id="ID_00041">
				<name>95</name>
				<Snippet maxLines="0"></Snippet>
				<description><![CDATA[<html xmlns:fo="http://www.w3.org/1999/XSL/Format" xmlns:msxsl="urn:schemas-microsoft-com:xslt">

<head>

<META http-equiv="Content-Type" content="text/html">

<meta http-equiv="content-type" content="text/html; charset=UTF-8">

</head>

<body style="margin:0px 0px 0px 0px;overflow:auto;background:#FFFFFF;">

<table style="font-family:Arial,Verdana,Times;font-size:12px;text-align:left;width:100%;border-collapse:collapse;padding:3px 3px 3px 3px">

<tr style="text-align:center;font-weight:bold;background:#9CBCE2">

<td>95</td>

</tr>

<tr>

<td>

<table style="font-family:Arial,Verdana,Times;font-size:12px;text-align:left;width:100%;border-spacing:0px; padding:3px 3px 3px 3px">

<tr>

<td>FID</td>

<td>41</td>

</tr>

<tr bgcolor="#D4E4F3">

<td>F1_for_irr</td>

<td>0</td>

</tr>

<tr>

<td>Name</td>

<td>95</td>

</tr>

<tr bgcolor="#D4E4F3">

<td>Name_2</td>

<td>95</td>

</tr>

<tr>

<td>Name_1</td>

<td>95</td>

</tr>

<tr bgcolor="#D4E4F3">

<td>F1_for_i_1</td>

<td>0</td>

</tr>

<tr>

<td>notes</td>

<td>wheat</td>

</tr>

<tr bgcolor="#D4E4F3">

<td>new_number</td>

<td>2</td>

</tr>

<tr>

<td>elevation</td>

<td>1530</td>

</tr>

</table>

</td>

</tr>

</table>

</body>

</html>]]></description>
				<styleUrl>#IconStyle09</styleUrl>
				<Point>
					<coordinates>-114.6142507463748,43.34698291912645,0</coordinates>
				</Point>
			</Placemark>
			<Placemark id="ID_00042">
				<name>96</name>
				<Snippet maxLines="0"></Snippet>
				<description><![CDATA[<html xmlns:fo="http://www.w3.org/1999/XSL/Format" xmlns:msxsl="urn:schemas-microsoft-com:xslt">

<head>

<META http-equiv="Content-Type" content="text/html">

<meta http-equiv="content-type" content="text/html; charset=UTF-8">

</head>

<body style="margin:0px 0px 0px 0px;overflow:auto;background:#FFFFFF;">

<table style="font-family:Arial,Verdana,Times;font-size:12px;text-align:left;width:100%;border-collapse:collapse;padding:3px 3px 3px 3px">

<tr style="text-align:center;font-weight:bold;background:#9CBCE2">

<td>96</td>

</tr>

<tr>

<td>

<table style="font-family:Arial,Verdana,Times;font-size:12px;text-align:left;width:100%;border-spacing:0px; padding:3px 3px 3px 3px">

<tr>

<td>FID</td>

<td>42</td>

</tr>

<tr bgcolor="#D4E4F3">

<td>F1_for_irr</td>

<td>0</td>

</tr>

<tr>

<td>Name</td>

<td>96</td>

</tr>

<tr bgcolor="#D4E4F3">

<td>Name_2</td>

<td>96</td>

</tr>

<tr>

<td>Name_1</td>

<td>96</td>

</tr>

<tr bgcolor="#D4E4F3">

<td>F1_for_i_1</td>

<td>0</td>

</tr>

<tr>

<td>notes</td>

<td></td>

</tr>

<tr bgcolor="#D4E4F3">

<td>new_number</td>

<td>0</td>

</tr>

<tr>

<td>elevation</td>

<td>1794</td>

</tr>

</table>

</td>

</tr>

</table>

</body>

</html>]]></description>
				<styleUrl>#IconStyle09</styleUrl>
				<Point>
					<coordinates>-114.5876592099046,43.39345293160756,0</coordinates>
				</Point>
			</Placemark>
			<Placemark id="ID_00043">
				<name>97</name>
				<Snippet maxLines="0"></Snippet>
				<description><![CDATA[<html xmlns:fo="http://www.w3.org/1999/XSL/Format" xmlns:msxsl="urn:schemas-microsoft-com:xslt">

<head>

<META http-equiv="Content-Type" content="text/html">

<meta http-equiv="content-type" content="text/html; charset=UTF-8">

</head>

<body style="margin:0px 0px 0px 0px;overflow:auto;background:#FFFFFF;">

<table style="font-family:Arial,Verdana,Times;font-size:12px;text-align:left;width:100%;border-collapse:collapse;padding:3px 3px 3px 3px">

<tr style="text-align:center;font-weight:bold;background:#9CBCE2">

<td>97</td>

</tr>

<tr>

<td>

<table style="font-family:Arial,Verdana,Times;font-size:12px;text-align:left;width:100%;border-spacing:0px; padding:3px 3px 3px 3px">

<tr>

<td>FID</td>

<td>43</td>

</tr>

<tr bgcolor="#D4E4F3">

<td>F1_for_irr</td>

<td>0</td>

</tr>

<tr>

<td>Name</td>

<td>97</td>

</tr>

<tr bgcolor="#D4E4F3">

<td>Name_2</td>

<td>97</td>

</tr>

<tr>

<td>Name_1</td>

<td>97</td>

</tr>

<tr bgcolor="#D4E4F3">

<td>F1_for_i_1</td>

<td>0</td>

</tr>

<tr>

<td>notes</td>

<td>wheat</td>

</tr>

<tr bgcolor="#D4E4F3">

<td>new_number</td>

<td>2</td>

</tr>

<tr>

<td>elevation</td>

<td>1552</td>

</tr>

</table>

</td>

</tr>

</table>

</body>

</html>]]></description>
				<styleUrl>#IconStyle09</styleUrl>
				<Point>
					<coordinates>-114.8957120176954,43.24479266275125,0</coordinates>
				</Point>
			</Placemark>
			<Placemark id="ID_00044">
				<name>98</name>
				<Snippet maxLines="0"></Snippet>
				<description><![CDATA[<html xmlns:fo="http://www.w3.org/1999/XSL/Format" xmlns:msxsl="urn:schemas-microsoft-com:xslt">

<head>

<META http-equiv="Content-Type" content="text/html">

<meta http-equiv="content-type" content="text/html; charset=UTF-8">

</head>

<body style="margin:0px 0px 0px 0px;overflow:auto;background:#FFFFFF;">

<table style="font-family:Arial,Verdana,Times;font-size:12px;text-align:left;width:100%;border-collapse:collapse;padding:3px 3px 3px 3px">

<tr style="text-align:center;font-weight:bold;background:#9CBCE2">

<td>98</td>

</tr>

<tr>

<td>

<table style="font-family:Arial,Verdana,Times;font-size:12px;text-align:left;width:100%;border-spacing:0px; padding:3px 3px 3px 3px">

<tr>

<td>FID</td>

<td>44</td>

</tr>

<tr bgcolor="#D4E4F3">

<td>F1_for_irr</td>

<td>0</td>

</tr>

<tr>

<td>Name</td>

<td>98</td>

</tr>

<tr bgcolor="#D4E4F3">

<td>Name_2</td>

<td>98</td>

</tr>

<tr>

<td>Name_1</td>

<td>98</td>

</tr>

<tr bgcolor="#D4E4F3">

<td>F1_for_i_1</td>

<td>0</td>

</tr>

<tr>

<td>notes</td>

<td>wheat</td>

</tr>

<tr bgcolor="#D4E4F3">

<td>new_number</td>

<td>2</td>

</tr>

<tr>

<td>elevation</td>

<td>1541</td>

</tr>

</table>

</td>

</tr>

</table>

</body>

</html>]]></description>
				<styleUrl>#IconStyle09</styleUrl>
				<Point>
					<coordinates>-114.8202131252355,43.27467718830167,0</coordinates>
				</Point>
			</Placemark>
			<Placemark id="ID_00045">
				<name>99</name>
				<Snippet maxLines="0"></Snippet>
				<description><![CDATA[<html xmlns:fo="http://www.w3.org/1999/XSL/Format" xmlns:msxsl="urn:schemas-microsoft-com:xslt">

<head>

<META http-equiv="Content-Type" content="text/html">

<meta http-equiv="content-type" content="text/html; charset=UTF-8">

</head>

<body style="margin:0px 0px 0px 0px;overflow:auto;background:#FFFFFF;">

<table style="font-family:Arial,Verdana,Times;font-size:12px;text-align:left;width:100%;border-collapse:collapse;padding:3px 3px 3px 3px">

<tr style="text-align:center;font-weight:bold;background:#9CBCE2">

<td>99</td>

</tr>

<tr>

<td>

<table style="font-family:Arial,Verdana,Times;font-size:12px;text-align:left;width:100%;border-spacing:0px; padding:3px 3px 3px 3px">

<tr>

<td>FID</td>

<td>45</td>

</tr>

<tr bgcolor="#D4E4F3">

<td>F1_for_irr</td>

<td>0</td>

</tr>

<tr>

<td>Name</td>

<td>99</td>

</tr>

<tr bgcolor="#D4E4F3">

<td>Name_2</td>

<td>99</td>

</tr>

<tr>

<td>Name_1</td>

<td>99</td>

</tr>

<tr bgcolor="#D4E4F3">

<td>F1_for_i_1</td>

<td>0</td>

</tr>

<tr>

<td>notes</td>

<td>wheat</td>

</tr>

<tr bgcolor="#D4E4F3">

<td>new_number</td>

<td>2</td>

</tr>

<tr>

<td>elevation</td>

<td>1556</td>

</tr>

</table>

</td>

</tr>

</table>

</body>

</html>]]></description>
				<styleUrl>#IconStyle09</styleUrl>
				<Point>
					<coordinates>-114.8155300414782,43.37204912986351,0</coordinates>
				</Point>
			</Placemark>
			<Placemark id="ID_00046">
				<name>100</name>
				<Snippet maxLines="0"></Snippet>
				<description><![CDATA[<html xmlns:fo="http://www.w3.org/1999/XSL/Format" xmlns:msxsl="urn:schemas-microsoft-com:xslt">

<head>

<META http-equiv="Content-Type" content="text/html">

<meta http-equiv="content-type" content="text/html; charset=UTF-8">

</head>

<body style="margin:0px 0px 0px 0px;overflow:auto;background:#FFFFFF;">

<table style="font-family:Arial,Verdana,Times;font-size:12px;text-align:left;width:100%;border-collapse:collapse;padding:3px 3px 3px 3px">

<tr style="text-align:center;font-weight:bold;background:#9CBCE2">

<td>100</td>

</tr>

<tr>

<td>

<table style="font-family:Arial,Verdana,Times;font-size:12px;text-align:left;width:100%;border-spacing:0px; padding:3px 3px 3px 3px">

<tr>

<td>FID</td>

<td>46</td>

</tr>

<tr bgcolor="#D4E4F3">

<td>F1_for_irr</td>

<td>0</td>

</tr>

<tr>

<td>Name</td>

<td>100</td>

</tr>

<tr bgcolor="#D4E4F3">

<td>Name_2</td>

<td>100</td>

</tr>

<tr>

<td>Name_1</td>

<td>100</td>

</tr>

<tr bgcolor="#D4E4F3">

<td>F1_for_i_1</td>

<td>0</td>

</tr>

<tr>

<td>notes</td>

<td>wheat</td>

</tr>

<tr bgcolor="#D4E4F3">

<td>new_number</td>

<td>2</td>

</tr>

<tr>

<td>elevation</td>

<td>1546</td>

</tr>

</table>

</td>

</tr>

</table>

</body>

</html>]]></description>
				<styleUrl>#IconStyle09</styleUrl>
				<Point>
					<coordinates>-114.8362053024328,43.36022373833492,0</coordinates>
				</Point>
			</Placemark>
			<Placemark id="ID_00047">
				<name>101</name>
				<Snippet maxLines="0"></Snippet>
				<description><![CDATA[<html xmlns:fo="http://www.w3.org/1999/XSL/Format" xmlns:msxsl="urn:schemas-microsoft-com:xslt">

<head>

<META http-equiv="Content-Type" content="text/html">

<meta http-equiv="content-type" content="text/html; charset=UTF-8">

</head>

<body style="margin:0px 0px 0px 0px;overflow:auto;background:#FFFFFF;">

<table style="font-family:Arial,Verdana,Times;font-size:12px;text-align:left;width:100%;border-collapse:collapse;padding:3px 3px 3px 3px">

<tr style="text-align:center;font-weight:bold;background:#9CBCE2">

<td>101</td>

</tr>

<tr>

<td>

<table style="font-family:Arial,Verdana,Times;font-size:12px;text-align:left;width:100%;border-spacing:0px; padding:3px 3px 3px 3px">

<tr>

<td>FID</td>

<td>47</td>

</tr>

<tr bgcolor="#D4E4F3">

<td>F1_for_irr</td>

<td>0</td>

</tr>

<tr>

<td>Name</td>

<td>101</td>

</tr>

<tr bgcolor="#D4E4F3">

<td>Name_2</td>

<td>101</td>

</tr>

<tr>

<td>Name_1</td>

<td>101</td>

</tr>

<tr bgcolor="#D4E4F3">

<td>F1_for_i_1</td>

<td>0</td>

</tr>

<tr>

<td>notes</td>

<td>variable year to year</td>

</tr>

<tr bgcolor="#D4E4F3">

<td>new_number</td>

<td>2</td>

</tr>

<tr>

<td>elevation</td>

<td>1574</td>

</tr>

</table>

</td>

</tr>

</table>

</body>

</html>]]></description>
				<styleUrl>#IconStyle09</styleUrl>
				<Point>
					<coordinates>-114.9008525029406,43.38718994765799,0</coordinates>
				</Point>
			</Placemark>
			<Placemark id="ID_00048">
				<name>102</name>
				<Snippet maxLines="0"></Snippet>
				<description><![CDATA[<html xmlns:fo="http://www.w3.org/1999/XSL/Format" xmlns:msxsl="urn:schemas-microsoft-com:xslt">

<head>

<META http-equiv="Content-Type" content="text/html">

<meta http-equiv="content-type" content="text/html; charset=UTF-8">

</head>

<body style="margin:0px 0px 0px 0px;overflow:auto;background:#FFFFFF;">

<table style="font-family:Arial,Verdana,Times;font-size:12px;text-align:left;width:100%;border-collapse:collapse;padding:3px 3px 3px 3px">

<tr style="text-align:center;font-weight:bold;background:#9CBCE2">

<td>102</td>

</tr>

<tr>

<td>

<table style="font-family:Arial,Verdana,Times;font-size:12px;text-align:left;width:100%;border-spacing:0px; padding:3px 3px 3px 3px">

<tr>

<td>FID</td>

<td>48</td>

</tr>

<tr bgcolor="#D4E4F3">

<td>F1_for_irr</td>

<td>0</td>

</tr>

<tr>

<td>Name</td>

<td>102</td>

</tr>

<tr bgcolor="#D4E4F3">

<td>Name_2</td>

<td>102</td>

</tr>

<tr>

<td>Name_1</td>

<td>102</td>

</tr>

<tr bgcolor="#D4E4F3">

<td>F1_for_i_1</td>

<td>0</td>

</tr>

<tr>

<td>notes</td>

<td>variable year to year</td>

</tr>

<tr bgcolor="#D4E4F3">

<td>new_number</td>

<td>2</td>

</tr>

<tr>

<td>elevation</td>

<td>1553</td>

</tr>

</table>

</td>

</tr>

</table>

</body>

</html>]]></description>
				<styleUrl>#IconStyle09</styleUrl>
				<Point>
					<coordinates>-114.9358921924707,43.35330603804329,0</coordinates>
				</Point>
			</Placemark>
			<Placemark id="ID_00049">
				<name>103</name>
				<Snippet maxLines="0"></Snippet>
				<description><![CDATA[<html xmlns:fo="http://www.w3.org/1999/XSL/Format" xmlns:msxsl="urn:schemas-microsoft-com:xslt">

<head>

<META http-equiv="Content-Type" content="text/html">

<meta http-equiv="content-type" content="text/html; charset=UTF-8">

</head>

<body style="margin:0px 0px 0px 0px;overflow:auto;background:#FFFFFF;">

<table style="font-family:Arial,Verdana,Times;font-size:12px;text-align:left;width:100%;border-collapse:collapse;padding:3px 3px 3px 3px">

<tr style="text-align:center;font-weight:bold;background:#9CBCE2">

<td>103</td>

</tr>

<tr>

<td>

<table style="font-family:Arial,Verdana,Times;font-size:12px;text-align:left;width:100%;border-spacing:0px; padding:3px 3px 3px 3px">

<tr>

<td>FID</td>

<td>49</td>

</tr>

<tr bgcolor="#D4E4F3">

<td>F1_for_irr</td>

<td>0</td>

</tr>

<tr>

<td>Name</td>

<td>103</td>

</tr>

<tr bgcolor="#D4E4F3">

<td>Name_2</td>

<td>103</td>

</tr>

<tr>

<td>Name_1</td>

<td>103</td>

</tr>

<tr bgcolor="#D4E4F3">

<td>F1_for_i_1</td>

<td>0</td>

</tr>

<tr>

<td>notes</td>

<td></td>

</tr>

<tr bgcolor="#D4E4F3">

<td>new_number</td>

<td>0</td>

</tr>

<tr>

<td>elevation</td>

<td>1554</td>

</tr>

</table>

</td>

</tr>

</table>

</body>

</html>]]></description>
				<styleUrl>#IconStyle09</styleUrl>
				<Point>
					<coordinates>-115.0380138737413,43.31760151389881,0</coordinates>
				</Point>
			</Placemark>
			<Placemark id="ID_00050">
				<name>104</name>
				<Snippet maxLines="0"></Snippet>
				<description><![CDATA[<html xmlns:fo="http://www.w3.org/1999/XSL/Format" xmlns:msxsl="urn:schemas-microsoft-com:xslt">

<head>

<META http-equiv="Content-Type" content="text/html">

<meta http-equiv="content-type" content="text/html; charset=UTF-8">

</head>

<body style="margin:0px 0px 0px 0px;overflow:auto;background:#FFFFFF;">

<table style="font-family:Arial,Verdana,Times;font-size:12px;text-align:left;width:100%;border-collapse:collapse;padding:3px 3px 3px 3px">

<tr style="text-align:center;font-weight:bold;background:#9CBCE2">

<td>104</td>

</tr>

<tr>

<td>

<table style="font-family:Arial,Verdana,Times;font-size:12px;text-align:left;width:100%;border-spacing:0px; padding:3px 3px 3px 3px">

<tr>

<td>FID</td>

<td>50</td>

</tr>

<tr bgcolor="#D4E4F3">

<td>F1_for_irr</td>

<td>1</td>

</tr>

<tr>

<td>Name</td>

<td>104</td>

</tr>

<tr bgcolor="#D4E4F3">

<td>Name_2</td>

<td>104</td>

</tr>

<tr>

<td>Name_1</td>

<td>104</td>

</tr>

<tr bgcolor="#D4E4F3">

<td>F1_for_i_1</td>

<td>1</td>

</tr>

<tr>

<td>notes</td>

<td></td>

</tr>

<tr bgcolor="#D4E4F3">

<td>new_number</td>

<td>1</td>

</tr>

<tr>

<td>elevation</td>

<td>691</td>

</tr>

</table>

</td>

</tr>

</table>

</body>

</html>]]></description>
				<styleUrl>#IconStyle00</styleUrl>
				<Point>
					<coordinates>-116.9716194330903,43.8529236767863,0</coordinates>
				</Point>
			</Placemark>
			<Placemark id="ID_00051">
				<name>105</name>
				<Snippet maxLines="0"></Snippet>
				<description><![CDATA[<html xmlns:fo="http://www.w3.org/1999/XSL/Format" xmlns:msxsl="urn:schemas-microsoft-com:xslt">

<head>

<META http-equiv="Content-Type" content="text/html">

<meta http-equiv="content-type" content="text/html; charset=UTF-8">

</head>

<body style="margin:0px 0px 0px 0px;overflow:auto;background:#FFFFFF;">

<table style="font-family:Arial,Verdana,Times;font-size:12px;text-align:left;width:100%;border-collapse:collapse;padding:3px 3px 3px 3px">

<tr style="text-align:center;font-weight:bold;background:#9CBCE2">

<td>105</td>

</tr>

<tr>

<td>

<table style="font-family:Arial,Verdana,Times;font-size:12px;text-align:left;width:100%;border-spacing:0px; padding:3px 3px 3px 3px">

<tr>

<td>FID</td>

<td>51</td>

</tr>

<tr bgcolor="#D4E4F3">

<td>F1_for_irr</td>

<td>1</td>

</tr>

<tr>

<td>Name</td>

<td>105</td>

</tr>

<tr bgcolor="#D4E4F3">

<td>Name_2</td>

<td>105</td>

</tr>

<tr>

<td>Name_1</td>

<td>105</td>

</tr>

<tr bgcolor="#D4E4F3">

<td>F1_for_i_1</td>

<td>1</td>

</tr>

<tr>

<td>notes</td>

<td></td>

</tr>

<tr bgcolor="#D4E4F3">

<td>new_number</td>

<td>1</td>

</tr>

<tr>

<td>elevation</td>

<td>703</td>

</tr>

</table>

</td>

</tr>

</table>

</body>

</html>]]></description>
				<styleUrl>#IconStyle00</styleUrl>
				<Point>
					<coordinates>-116.9671277394536,43.69426531739055,0</coordinates>
				</Point>
			</Placemark>
			<Placemark id="ID_00052">
				<name>106</name>
				<Snippet maxLines="0"></Snippet>
				<description><![CDATA[<html xmlns:fo="http://www.w3.org/1999/XSL/Format" xmlns:msxsl="urn:schemas-microsoft-com:xslt">

<head>

<META http-equiv="Content-Type" content="text/html">

<meta http-equiv="content-type" content="text/html; charset=UTF-8">

</head>

<body style="margin:0px 0px 0px 0px;overflow:auto;background:#FFFFFF;">

<table style="font-family:Arial,Verdana,Times;font-size:12px;text-align:left;width:100%;border-collapse:collapse;padding:3px 3px 3px 3px">

<tr style="text-align:center;font-weight:bold;background:#9CBCE2">

<td>106</td>

</tr>

<tr>

<td>

<table style="font-family:Arial,Verdana,Times;font-size:12px;text-align:left;width:100%;border-spacing:0px; padding:3px 3px 3px 3px">

<tr>

<td>FID</td>

<td>52</td>

</tr>

<tr bgcolor="#D4E4F3">

<td>F1_for_irr</td>

<td>1</td>

</tr>

<tr>

<td>Name</td>

<td>106</td>

</tr>

<tr bgcolor="#D4E4F3">

<td>Name_2</td>

<td>106</td>

</tr>

<tr>

<td>Name_1</td>

<td>106</td>

</tr>

<tr bgcolor="#D4E4F3">

<td>F1_for_i_1</td>

<td>1</td>

</tr>

<tr>

<td>notes</td>

<td></td>

</tr>

<tr bgcolor="#D4E4F3">

<td>new_number</td>

<td>1</td>

</tr>

<tr>

<td>elevation</td>

<td>700</td>

</tr>

</table>

</td>

</tr>

</table>

</body>

</html>]]></description>
				<styleUrl>#IconStyle00</styleUrl>
				<Point>
					<coordinates>-116.8149256984622,43.59390491248178,0</coordinates>
				</Point>
			</Placemark>
			<Placemark id="ID_00053">
				<name>107</name>
				<Snippet maxLines="0"></Snippet>
				<description><![CDATA[<html xmlns:fo="http://www.w3.org/1999/XSL/Format" xmlns:msxsl="urn:schemas-microsoft-com:xslt">

<head>

<META http-equiv="Content-Type" content="text/html">

<meta http-equiv="content-type" content="text/html; charset=UTF-8">

</head>

<body style="margin:0px 0px 0px 0px;overflow:auto;background:#FFFFFF;">

<table style="font-family:Arial,Verdana,Times;font-size:12px;text-align:left;width:100%;border-collapse:collapse;padding:3px 3px 3px 3px">

<tr style="text-align:center;font-weight:bold;background:#9CBCE2">

<td>107</td>

</tr>

<tr>

<td>

<table style="font-family:Arial,Verdana,Times;font-size:12px;text-align:left;width:100%;border-spacing:0px; padding:3px 3px 3px 3px">

<tr>

<td>FID</td>

<td>53</td>

</tr>

<tr bgcolor="#D4E4F3">

<td>F1_for_irr</td>

<td>1</td>

</tr>

<tr>

<td>Name</td>

<td>107</td>

</tr>

<tr bgcolor="#D4E4F3">

<td>Name_2</td>

<td>107</td>

</tr>

<tr>

<td>Name_1</td>

<td>107</td>

</tr>

<tr bgcolor="#D4E4F3">

<td>F1_for_i_1</td>

<td>1</td>

</tr>

<tr>

<td>notes</td>

<td></td>

</tr>

<tr bgcolor="#D4E4F3">

<td>new_number</td>

<td>1</td>

</tr>

<tr>

<td>elevation</td>

<td>724</td>

</tr>

</table>

</td>

</tr>

</table>

</body>

</html>]]></description>
				<styleUrl>#IconStyle00</styleUrl>
				<Point>
					<coordinates>-116.7305100971632,43.71852420492814,0</coordinates>
				</Point>
			</Placemark>
			<Placemark id="ID_00054">
				<name>108</name>
				<Snippet maxLines="0"></Snippet>
				<description><![CDATA[<html xmlns:fo="http://www.w3.org/1999/XSL/Format" xmlns:msxsl="urn:schemas-microsoft-com:xslt">

<head>

<META http-equiv="Content-Type" content="text/html">

<meta http-equiv="content-type" content="text/html; charset=UTF-8">

</head>

<body style="margin:0px 0px 0px 0px;overflow:auto;background:#FFFFFF;">

<table style="font-family:Arial,Verdana,Times;font-size:12px;text-align:left;width:100%;border-collapse:collapse;padding:3px 3px 3px 3px">

<tr style="text-align:center;font-weight:bold;background:#9CBCE2">

<td>108</td>

</tr>

<tr>

<td>

<table style="font-family:Arial,Verdana,Times;font-size:12px;text-align:left;width:100%;border-spacing:0px; padding:3px 3px 3px 3px">

<tr>

<td>FID</td>

<td>54</td>

</tr>

<tr bgcolor="#D4E4F3">

<td>F1_for_irr</td>

<td>1</td>

</tr>

<tr>

<td>Name</td>

<td>108</td>

</tr>

<tr bgcolor="#D4E4F3">

<td>Name_2</td>

<td>108</td>

</tr>

<tr>

<td>Name_1</td>

<td>108</td>

</tr>

<tr bgcolor="#D4E4F3">

<td>F1_for_i_1</td>

<td>1</td>

</tr>

<tr>

<td>notes</td>

<td></td>

</tr>

<tr bgcolor="#D4E4F3">

<td>new_number</td>

<td>1</td>

</tr>

<tr>

<td>elevation</td>

<td>720</td>

</tr>

</table>

</td>

</tr>

</table>

</body>

</html>]]></description>
				<styleUrl>#IconStyle00</styleUrl>
				<Point>
					<coordinates>-116.9578556077501,43.83922472134384,0</coordinates>
				</Point>
			</Placemark>
			<Placemark id="ID_00055">
				<name>109</name>
				<Snippet maxLines="0"></Snippet>
				<description><![CDATA[<html xmlns:fo="http://www.w3.org/1999/XSL/Format" xmlns:msxsl="urn:schemas-microsoft-com:xslt">

<head>

<META http-equiv="Content-Type" content="text/html">

<meta http-equiv="content-type" content="text/html; charset=UTF-8">

</head>

<body style="margin:0px 0px 0px 0px;overflow:auto;background:#FFFFFF;">

<table style="font-family:Arial,Verdana,Times;font-size:12px;text-align:left;width:100%;border-collapse:collapse;padding:3px 3px 3px 3px">

<tr style="text-align:center;font-weight:bold;background:#9CBCE2">

<td>109</td>

</tr>

<tr>

<td>

<table style="font-family:Arial,Verdana,Times;font-size:12px;text-align:left;width:100%;border-spacing:0px; padding:3px 3px 3px 3px">

<tr>

<td>FID</td>

<td>55</td>

</tr>

<tr bgcolor="#D4E4F3">

<td>F1_for_irr</td>

<td>1</td>

</tr>

<tr>

<td>Name</td>

<td>109</td>

</tr>

<tr bgcolor="#D4E4F3">

<td>Name_2</td>

<td>109</td>

</tr>

<tr>

<td>Name_1</td>

<td>109</td>

</tr>

<tr bgcolor="#D4E4F3">

<td>F1_for_i_1</td>

<td>1</td>

</tr>

<tr>

<td>notes</td>

<td></td>

</tr>

<tr bgcolor="#D4E4F3">

<td>new_number</td>

<td>1</td>

</tr>

<tr>

<td>elevation</td>

<td>799</td>

</tr>

</table>

</td>

</tr>

</table>

</body>

</html>]]></description>
				<styleUrl>#IconStyle00</styleUrl>
				<Point>
					<coordinates>-116.4985329089665,43.49222475426905,0</coordinates>
				</Point>
			</Placemark>
			<Placemark id="ID_00056">
				<name>110</name>
				<Snippet maxLines="0"></Snippet>
				<description><![CDATA[<html xmlns:fo="http://www.w3.org/1999/XSL/Format" xmlns:msxsl="urn:schemas-microsoft-com:xslt">

<head>

<META http-equiv="Content-Type" content="text/html">

<meta http-equiv="content-type" content="text/html; charset=UTF-8">

</head>

<body style="margin:0px 0px 0px 0px;overflow:auto;background:#FFFFFF;">

<table style="font-family:Arial,Verdana,Times;font-size:12px;text-align:left;width:100%;border-collapse:collapse;padding:3px 3px 3px 3px">

<tr style="text-align:center;font-weight:bold;background:#9CBCE2">

<td>110</td>

</tr>

<tr>

<td>

<table style="font-family:Arial,Verdana,Times;font-size:12px;text-align:left;width:100%;border-spacing:0px; padding:3px 3px 3px 3px">

<tr>

<td>FID</td>

<td>56</td>

</tr>

<tr bgcolor="#D4E4F3">

<td>F1_for_irr</td>

<td>1</td>

</tr>

<tr>

<td>Name</td>

<td>110</td>

</tr>

<tr bgcolor="#D4E4F3">

<td>Name_2</td>

<td>110</td>

</tr>

<tr>

<td>Name_1</td>

<td>110</td>

</tr>

<tr bgcolor="#D4E4F3">

<td>F1_for_i_1</td>

<td>1</td>

</tr>

<tr>

<td>notes</td>

<td></td>

</tr>

<tr bgcolor="#D4E4F3">

<td>new_number</td>

<td>1</td>

</tr>

<tr>

<td>elevation</td>

<td>858</td>

</tr>

</table>

</td>

</tr>

</table>

</body>

</html>]]></description>
				<styleUrl>#IconStyle00</styleUrl>
				<Point>
					<coordinates>-116.5211882423435,43.44086208811496,0</coordinates>
				</Point>
			</Placemark>
			<Placemark id="ID_00057">
				<name>111</name>
				<Snippet maxLines="0"></Snippet>
				<description><![CDATA[<html xmlns:fo="http://www.w3.org/1999/XSL/Format" xmlns:msxsl="urn:schemas-microsoft-com:xslt">

<head>

<META http-equiv="Content-Type" content="text/html">

<meta http-equiv="content-type" content="text/html; charset=UTF-8">

</head>

<body style="margin:0px 0px 0px 0px;overflow:auto;background:#FFFFFF;">

<table style="font-family:Arial,Verdana,Times;font-size:12px;text-align:left;width:100%;border-collapse:collapse;padding:3px 3px 3px 3px">

<tr style="text-align:center;font-weight:bold;background:#9CBCE2">

<td>111</td>

</tr>

<tr>

<td>

<table style="font-family:Arial,Verdana,Times;font-size:12px;text-align:left;width:100%;border-spacing:0px; padding:3px 3px 3px 3px">

<tr>

<td>FID</td>

<td>57</td>

</tr>

<tr bgcolor="#D4E4F3">

<td>F1_for_irr</td>

<td>1</td>

</tr>

<tr>

<td>Name</td>

<td>111</td>

</tr>

<tr bgcolor="#D4E4F3">

<td>Name_2</td>

<td>111</td>

</tr>

<tr>

<td>Name_1</td>

<td>111</td>

</tr>

<tr bgcolor="#D4E4F3">

<td>F1_for_i_1</td>

<td>1</td>

</tr>

<tr>

<td>notes</td>

<td></td>

</tr>

<tr bgcolor="#D4E4F3">

<td>new_number</td>

<td>1</td>

</tr>

<tr>

<td>elevation</td>

<td>821</td>

</tr>

</table>

</td>

</tr>

</table>

</body>

</html>]]></description>
				<styleUrl>#IconStyle00</styleUrl>
				<Point>
					<coordinates>-116.6085098823252,43.42676033442194,0</coordinates>
				</Point>
			</Placemark>
			<Placemark id="ID_00058">
				<name>112</name>
				<Snippet maxLines="0"></Snippet>
				<description><![CDATA[<html xmlns:fo="http://www.w3.org/1999/XSL/Format" xmlns:msxsl="urn:schemas-microsoft-com:xslt">

<head>

<META http-equiv="Content-Type" content="text/html">

<meta http-equiv="content-type" content="text/html; charset=UTF-8">

</head>

<body style="margin:0px 0px 0px 0px;overflow:auto;background:#FFFFFF;">

<table style="font-family:Arial,Verdana,Times;font-size:12px;text-align:left;width:100%;border-collapse:collapse;padding:3px 3px 3px 3px">

<tr style="text-align:center;font-weight:bold;background:#9CBCE2">

<td>112</td>

</tr>

<tr>

<td>

<table style="font-family:Arial,Verdana,Times;font-size:12px;text-align:left;width:100%;border-spacing:0px; padding:3px 3px 3px 3px">

<tr>

<td>FID</td>

<td>58</td>

</tr>

<tr bgcolor="#D4E4F3">

<td>F1_for_irr</td>

<td>1</td>

</tr>

<tr>

<td>Name</td>

<td>112</td>

</tr>

<tr bgcolor="#D4E4F3">

<td>Name_2</td>

<td>112</td>

</tr>

<tr>

<td>Name_1</td>

<td>112</td>

</tr>

<tr bgcolor="#D4E4F3">

<td>F1_for_i_1</td>

<td>1</td>

</tr>

<tr>

<td>notes</td>

<td></td>

</tr>

<tr bgcolor="#D4E4F3">

<td>new_number</td>

<td>1</td>

</tr>

<tr>

<td>elevation</td>

<td>708</td>

</tr>

</table>

</td>

</tr>

</table>

</body>

</html>]]></description>
				<styleUrl>#IconStyle00</styleUrl>
				<Point>
					<coordinates>-116.7604745418666,43.6820437682054,0</coordinates>
				</Point>
			</Placemark>
			<Placemark id="ID_00059">
				<name>113</name>
				<Snippet maxLines="0"></Snippet>
				<description><![CDATA[<html xmlns:fo="http://www.w3.org/1999/XSL/Format" xmlns:msxsl="urn:schemas-microsoft-com:xslt">

<head>

<META http-equiv="Content-Type" content="text/html">

<meta http-equiv="content-type" content="text/html; charset=UTF-8">

</head>

<body style="margin:0px 0px 0px 0px;overflow:auto;background:#FFFFFF;">

<table style="font-family:Arial,Verdana,Times;font-size:12px;text-align:left;width:100%;border-collapse:collapse;padding:3px 3px 3px 3px">

<tr style="text-align:center;font-weight:bold;background:#9CBCE2">

<td>113</td>

</tr>

<tr>

<td>

<table style="font-family:Arial,Verdana,Times;font-size:12px;text-align:left;width:100%;border-spacing:0px; padding:3px 3px 3px 3px">

<tr>

<td>FID</td>

<td>59</td>

</tr>

<tr bgcolor="#D4E4F3">

<td>F1_for_irr</td>

<td>1</td>

</tr>

<tr>

<td>Name</td>

<td>113</td>

</tr>

<tr bgcolor="#D4E4F3">

<td>Name_2</td>

<td>113</td>

</tr>

<tr>

<td>Name_1</td>

<td>113</td>

</tr>

<tr bgcolor="#D4E4F3">

<td>F1_for_i_1</td>

<td>1</td>

</tr>

<tr>

<td>notes</td>

<td></td>

</tr>

<tr bgcolor="#D4E4F3">

<td>new_number</td>

<td>1</td>

</tr>

<tr>

<td>elevation</td>

<td>683</td>

</tr>

</table>

</td>

</tr>

</table>

</body>

</html>]]></description>
				<styleUrl>#IconStyle00</styleUrl>
				<Point>
					<coordinates>-117.0098390992949,43.68519358791383,0</coordinates>
				</Point>
			</Placemark>
			<Placemark id="ID_00060">
				<name>116</name>
				<Snippet maxLines="0"></Snippet>
				<description><![CDATA[<html xmlns:fo="http://www.w3.org/1999/XSL/Format" xmlns:msxsl="urn:schemas-microsoft-com:xslt">

<head>

<META http-equiv="Content-Type" content="text/html">

<meta http-equiv="content-type" content="text/html; charset=UTF-8">

</head>

<body style="margin:0px 0px 0px 0px;overflow:auto;background:#FFFFFF;">

<table style="font-family:Arial,Verdana,Times;font-size:12px;text-align:left;width:100%;border-collapse:collapse;padding:3px 3px 3px 3px">

<tr style="text-align:center;font-weight:bold;background:#9CBCE2">

<td>116</td>

</tr>

<tr>

<td>

<table style="font-family:Arial,Verdana,Times;font-size:12px;text-align:left;width:100%;border-spacing:0px; padding:3px 3px 3px 3px">

<tr>

<td>FID</td>

<td>60</td>

</tr>

<tr bgcolor="#D4E4F3">

<td>F1_for_irr</td>

<td>0</td>

</tr>

<tr>

<td>Name</td>

<td>116</td>

</tr>

<tr bgcolor="#D4E4F3">

<td>Name_2</td>

<td>116</td>

</tr>

<tr>

<td>Name_1</td>

<td>116</td>

</tr>

<tr bgcolor="#D4E4F3">

<td>F1_for_i_1</td>

<td>0</td>

</tr>

<tr>

<td>notes</td>

<td></td>

</tr>

<tr bgcolor="#D4E4F3">

<td>new_number</td>

<td>0</td>

</tr>

<tr>

<td>elevation</td>

<td>719</td>

</tr>

</table>

</td>

</tr>

</table>

</body>

</html>]]></description>
				<styleUrl>#IconStyle09</styleUrl>
				<Point>
					<coordinates>-116.8201609083992,43.75765138060677,0</coordinates>
				</Point>
			</Placemark>
			<Placemark id="ID_00061">
				<name>124</name>
				<Snippet maxLines="0"></Snippet>
				<description><![CDATA[<html xmlns:fo="http://www.w3.org/1999/XSL/Format" xmlns:msxsl="urn:schemas-microsoft-com:xslt">

<head>

<META http-equiv="Content-Type" content="text/html">

<meta http-equiv="content-type" content="text/html; charset=UTF-8">

</head>

<body style="margin:0px 0px 0px 0px;overflow:auto;background:#FFFFFF;">

<table style="font-family:Arial,Verdana,Times;font-size:12px;text-align:left;width:100%;border-collapse:collapse;padding:3px 3px 3px 3px">

<tr style="text-align:center;font-weight:bold;background:#9CBCE2">

<td>124</td>

</tr>

<tr>

<td>

<table style="font-family:Arial,Verdana,Times;font-size:12px;text-align:left;width:100%;border-spacing:0px; padding:3px 3px 3px 3px">

<tr>

<td>FID</td>

<td>61</td>

</tr>

<tr bgcolor="#D4E4F3">

<td>F1_for_irr</td>

<td>1</td>

</tr>

<tr>

<td>Name</td>

<td>124</td>

</tr>

<tr bgcolor="#D4E4F3">

<td>Name_2</td>

<td>124</td>

</tr>

<tr>

<td>Name_1</td>

<td>124</td>

</tr>

<tr bgcolor="#D4E4F3">

<td>F1_for_i_1</td>

<td>1</td>

</tr>

<tr>

<td>notes</td>

<td></td>

</tr>

<tr bgcolor="#D4E4F3">

<td>new_number</td>

<td>1</td>

</tr>

<tr>

<td>elevation</td>

<td>1345</td>

</tr>

</table>

</td>

</tr>

</table>

</body>

</html>]]></description>
				<styleUrl>#IconStyle00</styleUrl>
				<Point>
					<coordinates>-114.0754134825461,42.37886152064272,0</coordinates>
				</Point>
			</Placemark>
			<Placemark id="ID_00062">
				<name>125</name>
				<Snippet maxLines="0"></Snippet>
				<description><![CDATA[<html xmlns:fo="http://www.w3.org/1999/XSL/Format" xmlns:msxsl="urn:schemas-microsoft-com:xslt">

<head>

<META http-equiv="Content-Type" content="text/html">

<meta http-equiv="content-type" content="text/html; charset=UTF-8">

</head>

<body style="margin:0px 0px 0px 0px;overflow:auto;background:#FFFFFF;">

<table style="font-family:Arial,Verdana,Times;font-size:12px;text-align:left;width:100%;border-collapse:collapse;padding:3px 3px 3px 3px">

<tr style="text-align:center;font-weight:bold;background:#9CBCE2">

<td>125</td>

</tr>

<tr>

<td>

<table style="font-family:Arial,Verdana,Times;font-size:12px;text-align:left;width:100%;border-spacing:0px; padding:3px 3px 3px 3px">

<tr>

<td>FID</td>

<td>62</td>

</tr>

<tr bgcolor="#D4E4F3">

<td>F1_for_irr</td>

<td>1</td>

</tr>

<tr>

<td>Name</td>

<td>125</td>

</tr>

<tr bgcolor="#D4E4F3">

<td>Name_2</td>

<td>125</td>

</tr>

<tr>

<td>Name_1</td>

<td>125</td>

</tr>

<tr bgcolor="#D4E4F3">

<td>F1_for_i_1</td>

<td>1</td>

</tr>

<tr>

<td>notes</td>

<td>maybe variable</td>

</tr>

<tr bgcolor="#D4E4F3">

<td>new_number</td>

<td>1</td>

</tr>

<tr>

<td>elevation</td>

<td>1313</td>

</tr>

</table>

</td>

</tr>

</table>

</body>

</html>]]></description>
				<styleUrl>#IconStyle00</styleUrl>
				<Point>
					<coordinates>-114.0166424369988,42.47999258878701,0</coordinates>
				</Point>
			</Placemark>
			<Placemark id="ID_00063">
				<name>126</name>
				<Snippet maxLines="0"></Snippet>
				<description><![CDATA[<html xmlns:fo="http://www.w3.org/1999/XSL/Format" xmlns:msxsl="urn:schemas-microsoft-com:xslt">

<head>

<META http-equiv="Content-Type" content="text/html">

<meta http-equiv="content-type" content="text/html; charset=UTF-8">

</head>

<body style="margin:0px 0px 0px 0px;overflow:auto;background:#FFFFFF;">

<table style="font-family:Arial,Verdana,Times;font-size:12px;text-align:left;width:100%;border-collapse:collapse;padding:3px 3px 3px 3px">

<tr style="text-align:center;font-weight:bold;background:#9CBCE2">

<td>126</td>

</tr>

<tr>

<td>

<table style="font-family:Arial,Verdana,Times;font-size:12px;text-align:left;width:100%;border-spacing:0px; padding:3px 3px 3px 3px">

<tr>

<td>FID</td>

<td>63</td>

</tr>

<tr bgcolor="#D4E4F3">

<td>F1_for_irr</td>

<td>1</td>

</tr>

<tr>

<td>Name</td>

<td>126</td>

</tr>

<tr bgcolor="#D4E4F3">

<td>Name_2</td>

<td>126</td>

</tr>

<tr>

<td>Name_1</td>

<td>126</td>

</tr>

<tr bgcolor="#D4E4F3">

<td>F1_for_i_1</td>

<td>1</td>

</tr>

<tr>

<td>notes</td>

<td>maybe not in 2010</td>

</tr>

<tr bgcolor="#D4E4F3">

<td>new_number</td>

<td>1</td>

</tr>

<tr>

<td>elevation</td>

<td>1328</td>

</tr>

</table>

</td>

</tr>

</table>

</body>

</html>]]></description>
				<styleUrl>#IconStyle00</styleUrl>
				<Point>
					<coordinates>-114.0837308319123,42.39176158582859,0</coordinates>
				</Point>
			</Placemark>
			<Placemark id="ID_00064">
				<name>127</name>
				<Snippet maxLines="0"></Snippet>
				<description><![CDATA[<html xmlns:fo="http://www.w3.org/1999/XSL/Format" xmlns:msxsl="urn:schemas-microsoft-com:xslt">

<head>

<META http-equiv="Content-Type" content="text/html">

<meta http-equiv="content-type" content="text/html; charset=UTF-8">

</head>

<body style="margin:0px 0px 0px 0px;overflow:auto;background:#FFFFFF;">

<table style="font-family:Arial,Verdana,Times;font-size:12px;text-align:left;width:100%;border-collapse:collapse;padding:3px 3px 3px 3px">

<tr style="text-align:center;font-weight:bold;background:#9CBCE2">

<td>127</td>

</tr>

<tr>

<td>

<table style="font-family:Arial,Verdana,Times;font-size:12px;text-align:left;width:100%;border-spacing:0px; padding:3px 3px 3px 3px">

<tr>

<td>FID</td>

<td>64</td>

</tr>

<tr bgcolor="#D4E4F3">

<td>F1_for_irr</td>

<td>0</td>

</tr>

<tr>

<td>Name</td>

<td>127</td>

</tr>

<tr bgcolor="#D4E4F3">

<td>Name_2</td>

<td>127</td>

</tr>

<tr>

<td>Name_1</td>

<td>127</td>

</tr>

<tr bgcolor="#D4E4F3">

<td>F1_for_i_1</td>

<td>0</td>

</tr>

<tr>

<td>notes</td>

<td></td>

</tr>

<tr bgcolor="#D4E4F3">

<td>new_number</td>

<td>0</td>

</tr>

<tr>

<td>elevation</td>

<td>1374</td>

</tr>

</table>

</td>

</tr>

</table>

</body>

</html>]]></description>
				<styleUrl>#IconStyle09</styleUrl>
				<Point>
					<coordinates>-114.010724183874,42.33385978090422,0</coordinates>
				</Point>
			</Placemark>
			<Placemark id="ID_00065">
				<name>128</name>
				<Snippet maxLines="0"></Snippet>
				<description><![CDATA[<html xmlns:fo="http://www.w3.org/1999/XSL/Format" xmlns:msxsl="urn:schemas-microsoft-com:xslt">

<head>

<META http-equiv="Content-Type" content="text/html">

<meta http-equiv="content-type" content="text/html; charset=UTF-8">

</head>

<body style="margin:0px 0px 0px 0px;overflow:auto;background:#FFFFFF;">

<table style="font-family:Arial,Verdana,Times;font-size:12px;text-align:left;width:100%;border-collapse:collapse;padding:3px 3px 3px 3px">

<tr style="text-align:center;font-weight:bold;background:#9CBCE2">

<td>128</td>

</tr>

<tr>

<td>

<table style="font-family:Arial,Verdana,Times;font-size:12px;text-align:left;width:100%;border-spacing:0px; padding:3px 3px 3px 3px">

<tr>

<td>FID</td>

<td>65</td>

</tr>

<tr bgcolor="#D4E4F3">

<td>F1_for_irr</td>

<td>1</td>

</tr>

<tr>

<td>Name</td>

<td>128</td>

</tr>

<tr bgcolor="#D4E4F3">

<td>Name_2</td>

<td>128</td>

</tr>

<tr>

<td>Name_1</td>

<td>128</td>

</tr>

<tr bgcolor="#D4E4F3">

<td>F1_for_i_1</td>

<td>1</td>

</tr>

<tr>

<td>notes</td>

<td></td>

</tr>

<tr bgcolor="#D4E4F3">

<td>new_number</td>

<td>1</td>

</tr>

<tr>

<td>elevation</td>

<td>817</td>

</tr>

</table>

</td>

</tr>

</table>

</body>

</html>]]></description>
				<styleUrl>#IconStyle00</styleUrl>
				<Point>
					<coordinates>-115.2240595527061,43.01815305162211,0</coordinates>
				</Point>
			</Placemark>
			<Placemark id="ID_00066">
				<name>129</name>
				<Snippet maxLines="0"></Snippet>
				<description><![CDATA[<html xmlns:fo="http://www.w3.org/1999/XSL/Format" xmlns:msxsl="urn:schemas-microsoft-com:xslt">

<head>

<META http-equiv="Content-Type" content="text/html">

<meta http-equiv="content-type" content="text/html; charset=UTF-8">

</head>

<body style="margin:0px 0px 0px 0px;overflow:auto;background:#FFFFFF;">

<table style="font-family:Arial,Verdana,Times;font-size:12px;text-align:left;width:100%;border-collapse:collapse;padding:3px 3px 3px 3px">

<tr style="text-align:center;font-weight:bold;background:#9CBCE2">

<td>129</td>

</tr>

<tr>

<td>

<table style="font-family:Arial,Verdana,Times;font-size:12px;text-align:left;width:100%;border-spacing:0px; padding:3px 3px 3px 3px">

<tr>

<td>FID</td>

<td>66</td>

</tr>

<tr bgcolor="#D4E4F3">

<td>F1_for_irr</td>

<td>1</td>

</tr>

<tr>

<td>Name</td>

<td>129</td>

</tr>

<tr bgcolor="#D4E4F3">

<td>Name_2</td>

<td>129</td>

</tr>

<tr>

<td>Name_1</td>

<td>129</td>

</tr>

<tr bgcolor="#D4E4F3">

<td>F1_for_i_1</td>

<td>1</td>

</tr>

<tr>

<td>notes</td>

<td></td>

</tr>

<tr bgcolor="#D4E4F3">

<td>new_number</td>

<td>1</td>

</tr>

<tr>

<td>elevation</td>

<td>811</td>

</tr>

</table>

</td>

</tr>

</table>

</body>

</html>]]></description>
				<styleUrl>#IconStyle00</styleUrl>
				<Point>
					<coordinates>-115.2191159254596,42.97816701529558,0</coordinates>
				</Point>
			</Placemark>
			<Placemark id="ID_00067">
				<name>130</name>
				<Snippet maxLines="0"></Snippet>
				<description><![CDATA[<html xmlns:fo="http://www.w3.org/1999/XSL/Format" xmlns:msxsl="urn:schemas-microsoft-com:xslt">

<head>

<META http-equiv="Content-Type" content="text/html">

<meta http-equiv="content-type" content="text/html; charset=UTF-8">

</head>

<body style="margin:0px 0px 0px 0px;overflow:auto;background:#FFFFFF;">

<table style="font-family:Arial,Verdana,Times;font-size:12px;text-align:left;width:100%;border-collapse:collapse;padding:3px 3px 3px 3px">

<tr style="text-align:center;font-weight:bold;background:#9CBCE2">

<td>130</td>

</tr>

<tr>

<td>

<table style="font-family:Arial,Verdana,Times;font-size:12px;text-align:left;width:100%;border-spacing:0px; padding:3px 3px 3px 3px">

<tr>

<td>FID</td>

<td>67</td>

</tr>

<tr bgcolor="#D4E4F3">

<td>F1_for_irr</td>

<td>1</td>

</tr>

<tr>

<td>Name</td>

<td>130</td>

</tr>

<tr bgcolor="#D4E4F3">

<td>Name_2</td>

<td>130</td>

</tr>

<tr>

<td>Name_1</td>

<td>130</td>

</tr>

<tr bgcolor="#D4E4F3">

<td>F1_for_i_1</td>

<td>1</td>

</tr>

<tr>

<td>notes</td>

<td></td>

</tr>

<tr bgcolor="#D4E4F3">

<td>new_number</td>

<td>1</td>

</tr>

<tr>

<td>elevation</td>

<td>812</td>

</tr>

</table>

</td>

</tr>

</table>

</body>

</html>]]></description>
				<styleUrl>#IconStyle00</styleUrl>
				<Point>
					<coordinates>-115.2088149117788,42.97011801553407,0</coordinates>
				</Point>
			</Placemark>
			<Placemark id="ID_00068">
				<name>131</name>
				<Snippet maxLines="0"></Snippet>
				<description><![CDATA[<html xmlns:fo="http://www.w3.org/1999/XSL/Format" xmlns:msxsl="urn:schemas-microsoft-com:xslt">

<head>

<META http-equiv="Content-Type" content="text/html">

<meta http-equiv="content-type" content="text/html; charset=UTF-8">

</head>

<body style="margin:0px 0px 0px 0px;overflow:auto;background:#FFFFFF;">

<table style="font-family:Arial,Verdana,Times;font-size:12px;text-align:left;width:100%;border-collapse:collapse;padding:3px 3px 3px 3px">

<tr style="text-align:center;font-weight:bold;background:#9CBCE2">

<td>131</td>

</tr>

<tr>

<td>

<table style="font-family:Arial,Verdana,Times;font-size:12px;text-align:left;width:100%;border-spacing:0px; padding:3px 3px 3px 3px">

<tr>

<td>FID</td>

<td>68</td>

</tr>

<tr bgcolor="#D4E4F3">

<td>F1_for_irr</td>

<td>1</td>

</tr>

<tr>

<td>Name</td>

<td>131</td>

</tr>

<tr bgcolor="#D4E4F3">

<td>Name_2</td>

<td>131</td>

</tr>

<tr>

<td>Name_1</td>

<td>131</td>

</tr>

<tr bgcolor="#D4E4F3">

<td>F1_for_i_1</td>

<td>1</td>

</tr>

<tr>

<td>notes</td>

<td></td>

</tr>

<tr bgcolor="#D4E4F3">

<td>new_number</td>

<td>1</td>

</tr>

<tr>

<td>elevation</td>

<td>781</td>

</tr>

</table>

</td>

</tr>

</table>

</body>

</html>]]></description>
				<styleUrl>#IconStyle00</styleUrl>
				<Point>
					<coordinates>-115.355089290938,42.93525900519899,0</coordinates>
				</Point>
			</Placemark>
			<Placemark id="ID_00069">
				<name>132</name>
				<Snippet maxLines="0"></Snippet>
				<description><![CDATA[<html xmlns:fo="http://www.w3.org/1999/XSL/Format" xmlns:msxsl="urn:schemas-microsoft-com:xslt">

<head>

<META http-equiv="Content-Type" content="text/html">

<meta http-equiv="content-type" content="text/html; charset=UTF-8">

</head>

<body style="margin:0px 0px 0px 0px;overflow:auto;background:#FFFFFF;">

<table style="font-family:Arial,Verdana,Times;font-size:12px;text-align:left;width:100%;border-collapse:collapse;padding:3px 3px 3px 3px">

<tr style="text-align:center;font-weight:bold;background:#9CBCE2">

<td>132</td>

</tr>

<tr>

<td>

<table style="font-family:Arial,Verdana,Times;font-size:12px;text-align:left;width:100%;border-spacing:0px; padding:3px 3px 3px 3px">

<tr>

<td>FID</td>

<td>69</td>

</tr>

<tr bgcolor="#D4E4F3">

<td>F1_for_irr</td>

<td>1</td>

</tr>

<tr>

<td>Name</td>

<td>132</td>

</tr>

<tr bgcolor="#D4E4F3">

<td>Name_2</td>

<td>132</td>

</tr>

<tr>

<td>Name_1</td>

<td>132</td>

</tr>

<tr bgcolor="#D4E4F3">

<td>F1_for_i_1</td>

<td>1</td>

</tr>

<tr>

<td>notes</td>

<td></td>

</tr>

<tr bgcolor="#D4E4F3">

<td>new_number</td>

<td>1</td>

</tr>

<tr>

<td>elevation</td>

<td>948</td>

</tr>

</table>

</td>

</tr>

</table>

</body>

</html>]]></description>
				<styleUrl>#IconStyle00</styleUrl>
				<Point>
					<coordinates>-115.3780982593272,42.92010791085147,0</coordinates>
				</Point>
			</Placemark>
			<Placemark id="ID_00070">
				<name>133</name>
				<Snippet maxLines="0"></Snippet>
				<description><![CDATA[<html xmlns:fo="http://www.w3.org/1999/XSL/Format" xmlns:msxsl="urn:schemas-microsoft-com:xslt">

<head>

<META http-equiv="Content-Type" content="text/html">

<meta http-equiv="content-type" content="text/html; charset=UTF-8">

</head>

<body style="margin:0px 0px 0px 0px;overflow:auto;background:#FFFFFF;">

<table style="font-family:Arial,Verdana,Times;font-size:12px;text-align:left;width:100%;border-collapse:collapse;padding:3px 3px 3px 3px">

<tr style="text-align:center;font-weight:bold;background:#9CBCE2">

<td>133</td>

</tr>

<tr>

<td>

<table style="font-family:Arial,Verdana,Times;font-size:12px;text-align:left;width:100%;border-spacing:0px; padding:3px 3px 3px 3px">

<tr>

<td>FID</td>

<td>70</td>

</tr>

<tr bgcolor="#D4E4F3">

<td>F1_for_irr</td>

<td>1</td>

</tr>

<tr>

<td>Name</td>

<td>133</td>

</tr>

<tr bgcolor="#D4E4F3">

<td>Name_2</td>

<td>133</td>

</tr>

<tr>

<td>Name_1</td>

<td>133</td>

</tr>

<tr bgcolor="#D4E4F3">

<td>F1_for_i_1</td>

<td>1</td>

</tr>

<tr>

<td>notes</td>

<td></td>

</tr>

<tr bgcolor="#D4E4F3">

<td>new_number</td>

<td>1</td>

</tr>

<tr>

<td>elevation</td>

<td>927</td>

</tr>

</table>

</td>

</tr>

</table>

</body>

</html>]]></description>
				<styleUrl>#IconStyle00</styleUrl>
				<Point>
					<coordinates>-115.721897086881,43.00040246869901,0</coordinates>
				</Point>
			</Placemark>
			<Placemark id="ID_00071">
				<name>134</name>
				<Snippet maxLines="0"></Snippet>
				<description><![CDATA[<html xmlns:fo="http://www.w3.org/1999/XSL/Format" xmlns:msxsl="urn:schemas-microsoft-com:xslt">

<head>

<META http-equiv="Content-Type" content="text/html">

<meta http-equiv="content-type" content="text/html; charset=UTF-8">

</head>

<body style="margin:0px 0px 0px 0px;overflow:auto;background:#FFFFFF;">

<table style="font-family:Arial,Verdana,Times;font-size:12px;text-align:left;width:100%;border-collapse:collapse;padding:3px 3px 3px 3px">

<tr style="text-align:center;font-weight:bold;background:#9CBCE2">

<td>134</td>

</tr>

<tr>

<td>

<table style="font-family:Arial,Verdana,Times;font-size:12px;text-align:left;width:100%;border-spacing:0px; padding:3px 3px 3px 3px">

<tr>

<td>FID</td>

<td>71</td>

</tr>

<tr bgcolor="#D4E4F3">

<td>F1_for_irr</td>

<td>1</td>

</tr>

<tr>

<td>Name</td>

<td>134</td>

</tr>

<tr bgcolor="#D4E4F3">

<td>Name_2</td>

<td>134</td>

</tr>

<tr>

<td>Name_1</td>

<td>134</td>

</tr>

<tr bgcolor="#D4E4F3">

<td>F1_for_i_1</td>

<td>1</td>

</tr>

<tr>

<td>notes</td>

<td></td>

</tr>

<tr bgcolor="#D4E4F3">

<td>new_number</td>

<td>1</td>

</tr>

<tr>

<td>elevation</td>

<td>1554</td>

</tr>

</table>

</td>

</tr>

</table>

</body>

</html>]]></description>
				<styleUrl>#IconStyle00</styleUrl>
				<Point>
					<coordinates>-115.121107855643,43.25911832964727,0</coordinates>
				</Point>
			</Placemark>
			<Placemark id="ID_00072">
				<name>135</name>
				<Snippet maxLines="0"></Snippet>
				<description><![CDATA[<html xmlns:fo="http://www.w3.org/1999/XSL/Format" xmlns:msxsl="urn:schemas-microsoft-com:xslt">

<head>

<META http-equiv="Content-Type" content="text/html">

<meta http-equiv="content-type" content="text/html; charset=UTF-8">

</head>

<body style="margin:0px 0px 0px 0px;overflow:auto;background:#FFFFFF;">

<table style="font-family:Arial,Verdana,Times;font-size:12px;text-align:left;width:100%;border-collapse:collapse;padding:3px 3px 3px 3px">

<tr style="text-align:center;font-weight:bold;background:#9CBCE2">

<td>135</td>

</tr>

<tr>

<td>

<table style="font-family:Arial,Verdana,Times;font-size:12px;text-align:left;width:100%;border-spacing:0px; padding:3px 3px 3px 3px">

<tr>

<td>FID</td>

<td>72</td>

</tr>

<tr bgcolor="#D4E4F3">

<td>F1_for_irr</td>

<td>1</td>

</tr>

<tr>

<td>Name</td>

<td>135</td>

</tr>

<tr bgcolor="#D4E4F3">

<td>Name_2</td>

<td>135</td>

</tr>

<tr>

<td>Name_1</td>

<td>135</td>

</tr>

<tr bgcolor="#D4E4F3">

<td>F1_for_i_1</td>

<td>1</td>

</tr>

<tr>

<td>notes</td>

<td></td>

</tr>

<tr bgcolor="#D4E4F3">

<td>new_number</td>

<td>1</td>

</tr>

<tr>

<td>elevation</td>

<td>938</td>

</tr>

</table>

</td>

</tr>

</table>

</body>

</html>]]></description>
				<styleUrl>#IconStyle00</styleUrl>
				<Point>
					<coordinates>-115.9340455459652,43.19659313616438,0</coordinates>
				</Point>
			</Placemark>
			<Placemark id="ID_00073">
				<name>136</name>
				<Snippet maxLines="0"></Snippet>
				<description><![CDATA[<html xmlns:fo="http://www.w3.org/1999/XSL/Format" xmlns:msxsl="urn:schemas-microsoft-com:xslt">

<head>

<META http-equiv="Content-Type" content="text/html">

<meta http-equiv="content-type" content="text/html; charset=UTF-8">

</head>

<body style="margin:0px 0px 0px 0px;overflow:auto;background:#FFFFFF;">

<table style="font-family:Arial,Verdana,Times;font-size:12px;text-align:left;width:100%;border-collapse:collapse;padding:3px 3px 3px 3px">

<tr style="text-align:center;font-weight:bold;background:#9CBCE2">

<td>136</td>

</tr>

<tr>

<td>

<table style="font-family:Arial,Verdana,Times;font-size:12px;text-align:left;width:100%;border-spacing:0px; padding:3px 3px 3px 3px">

<tr>

<td>FID</td>

<td>73</td>

</tr>

<tr bgcolor="#D4E4F3">

<td>F1_for_irr</td>

<td>1</td>

</tr>

<tr>

<td>Name</td>

<td>136</td>

</tr>

<tr bgcolor="#D4E4F3">

<td>Name_2</td>

<td>136</td>

</tr>

<tr>

<td>Name_1</td>

<td>136</td>

</tr>

<tr bgcolor="#D4E4F3">

<td>F1_for_i_1</td>

<td>1</td>

</tr>

<tr>

<td>notes</td>

<td></td>

</tr>

<tr bgcolor="#D4E4F3">

<td>new_number</td>

<td>1</td>

</tr>

<tr>

<td>elevation</td>

<td>842</td>

</tr>

</table>

</td>

</tr>

</table>

</body>

</html>]]></description>
				<styleUrl>#IconStyle00</styleUrl>
				<Point>
					<coordinates>-115.1901566287254,42.97789273915862,0</coordinates>
				</Point>
			</Placemark>
			<Placemark id="ID_00074">
				<name>137</name>
				<Snippet maxLines="0"></Snippet>
				<description><![CDATA[<html xmlns:fo="http://www.w3.org/1999/XSL/Format" xmlns:msxsl="urn:schemas-microsoft-com:xslt">

<head>

<META http-equiv="Content-Type" content="text/html">

<meta http-equiv="content-type" content="text/html; charset=UTF-8">

</head>

<body style="margin:0px 0px 0px 0px;overflow:auto;background:#FFFFFF;">

<table style="font-family:Arial,Verdana,Times;font-size:12px;text-align:left;width:100%;border-collapse:collapse;padding:3px 3px 3px 3px">

<tr style="text-align:center;font-weight:bold;background:#9CBCE2">

<td>137</td>

</tr>

<tr>

<td>

<table style="font-family:Arial,Verdana,Times;font-size:12px;text-align:left;width:100%;border-spacing:0px; padding:3px 3px 3px 3px">

<tr>

<td>FID</td>

<td>74</td>

</tr>

<tr bgcolor="#D4E4F3">

<td>F1_for_irr</td>

<td>1</td>

</tr>

<tr>

<td>Name</td>

<td>137</td>

</tr>

<tr bgcolor="#D4E4F3">

<td>Name_2</td>

<td>137</td>

</tr>

<tr>

<td>Name_1</td>

<td>137</td>

</tr>

<tr bgcolor="#D4E4F3">

<td>F1_for_i_1</td>

<td>1</td>

</tr>

<tr>

<td>notes</td>

<td></td>

</tr>

<tr bgcolor="#D4E4F3">

<td>new_number</td>

<td>1</td>

</tr>

<tr>

<td>elevation</td>

<td>818</td>

</tr>

</table>

</td>

</tr>

</table>

</body>

</html>]]></description>
				<styleUrl>#IconStyle00</styleUrl>
				<Point>
					<coordinates>-115.1490407867029,42.97119281689504,0</coordinates>
				</Point>
			</Placemark>
			<Placemark id="ID_00075">
				<name>138</name>
				<Snippet maxLines="0"></Snippet>
				<description><![CDATA[<html xmlns:fo="http://www.w3.org/1999/XSL/Format" xmlns:msxsl="urn:schemas-microsoft-com:xslt">

<head>

<META http-equiv="Content-Type" content="text/html">

<meta http-equiv="content-type" content="text/html; charset=UTF-8">

</head>

<body style="margin:0px 0px 0px 0px;overflow:auto;background:#FFFFFF;">

<table style="font-family:Arial,Verdana,Times;font-size:12px;text-align:left;width:100%;border-collapse:collapse;padding:3px 3px 3px 3px">

<tr style="text-align:center;font-weight:bold;background:#9CBCE2">

<td>138</td>

</tr>

<tr>

<td>

<table style="font-family:Arial,Verdana,Times;font-size:12px;text-align:left;width:100%;border-spacing:0px; padding:3px 3px 3px 3px">

<tr>

<td>FID</td>

<td>75</td>

</tr>

<tr bgcolor="#D4E4F3">

<td>F1_for_irr</td>

<td>0</td>

</tr>

<tr>

<td>Name</td>

<td>138</td>

</tr>

<tr bgcolor="#D4E4F3">

<td>Name_2</td>

<td>138</td>

</tr>

<tr>

<td>Name_1</td>

<td>138</td>

</tr>

<tr bgcolor="#D4E4F3">

<td>F1_for_i_1</td>

<td>0</td>

</tr>

<tr>

<td>notes</td>

<td>wheat</td>

</tr>

<tr bgcolor="#D4E4F3">

<td>new_number</td>

<td>2</td>

</tr>

<tr>

<td>elevation</td>

<td>1439</td>

</tr>

</table>

</td>

</tr>

</table>

</body>

</html>]]></description>
				<styleUrl>#IconStyle09</styleUrl>
				<Point>
					<coordinates>-115.5928576022965,43.46063311942299,0</coordinates>
				</Point>
			</Placemark>
			<Placemark id="ID_00076">
				<name>139</name>
				<Snippet maxLines="0"></Snippet>
				<description><![CDATA[<html xmlns:fo="http://www.w3.org/1999/XSL/Format" xmlns:msxsl="urn:schemas-microsoft-com:xslt">

<head>

<META http-equiv="Content-Type" content="text/html">

<meta http-equiv="content-type" content="text/html; charset=UTF-8">

</head>

<body style="margin:0px 0px 0px 0px;overflow:auto;background:#FFFFFF;">

<table style="font-family:Arial,Verdana,Times;font-size:12px;text-align:left;width:100%;border-collapse:collapse;padding:3px 3px 3px 3px">

<tr style="text-align:center;font-weight:bold;background:#9CBCE2">

<td>139</td>

</tr>

<tr>

<td>

<table style="font-family:Arial,Verdana,Times;font-size:12px;text-align:left;width:100%;border-spacing:0px; padding:3px 3px 3px 3px">

<tr>

<td>FID</td>

<td>76</td>

</tr>

<tr bgcolor="#D4E4F3">

<td>F1_for_irr</td>

<td>0</td>

</tr>

<tr>

<td>Name</td>

<td>139</td>

</tr>

<tr bgcolor="#D4E4F3">

<td>Name_2</td>

<td>139</td>

</tr>

<tr>

<td>Name_1</td>

<td>139</td>

</tr>

<tr bgcolor="#D4E4F3">

<td>F1_for_i_1</td>

<td>0</td>

</tr>

<tr>

<td>notes</td>

<td>wheat</td>

</tr>

<tr bgcolor="#D4E4F3">

<td>new_number</td>

<td>2</td>

</tr>

<tr>

<td>elevation</td>

<td>1553</td>

</tr>

</table>

</td>

</tr>

</table>

</body>

</html>]]></description>
				<styleUrl>#IconStyle09</styleUrl>
				<Point>
					<coordinates>-115.109028119652,43.29750284787821,0</coordinates>
				</Point>
			</Placemark>
			<Placemark id="ID_00077">
				<name>140</name>
				<Snippet maxLines="0"></Snippet>
				<description><![CDATA[<html xmlns:fo="http://www.w3.org/1999/XSL/Format" xmlns:msxsl="urn:schemas-microsoft-com:xslt">

<head>

<META http-equiv="Content-Type" content="text/html">

<meta http-equiv="content-type" content="text/html; charset=UTF-8">

</head>

<body style="margin:0px 0px 0px 0px;overflow:auto;background:#FFFFFF;">

<table style="font-family:Arial,Verdana,Times;font-size:12px;text-align:left;width:100%;border-collapse:collapse;padding:3px 3px 3px 3px">

<tr style="text-align:center;font-weight:bold;background:#9CBCE2">

<td>140</td>

</tr>

<tr>

<td>

<table style="font-family:Arial,Verdana,Times;font-size:12px;text-align:left;width:100%;border-spacing:0px; padding:3px 3px 3px 3px">

<tr>

<td>FID</td>

<td>77</td>

</tr>

<tr bgcolor="#D4E4F3">

<td>F1_for_irr</td>

<td>0</td>

</tr>

<tr>

<td>Name</td>

<td>140</td>

</tr>

<tr bgcolor="#D4E4F3">

<td>Name_2</td>

<td>140</td>

</tr>

<tr>

<td>Name_1</td>

<td>140</td>

</tr>

<tr bgcolor="#D4E4F3">

<td>F1_for_i_1</td>

<td>0</td>

</tr>

<tr>

<td>notes</td>

<td></td>

</tr>

<tr bgcolor="#D4E4F3">

<td>new_number</td>

<td>0</td>

</tr>

<tr>

<td>elevation</td>

<td>1626</td>

</tr>

</table>

</td>

</tr>

</table>

</body>

</html>]]></description>
				<styleUrl>#IconStyle09</styleUrl>
				<Point>
					<coordinates>-115.1998456672437,43.25411784636157,0</coordinates>
				</Point>
			</Placemark>
			<Placemark id="ID_00078">
				<name>143</name>
				<Snippet maxLines="0"></Snippet>
				<description><![CDATA[<html xmlns:fo="http://www.w3.org/1999/XSL/Format" xmlns:msxsl="urn:schemas-microsoft-com:xslt">

<head>

<META http-equiv="Content-Type" content="text/html">

<meta http-equiv="content-type" content="text/html; charset=UTF-8">

</head>

<body style="margin:0px 0px 0px 0px;overflow:auto;background:#FFFFFF;">

<table style="font-family:Arial,Verdana,Times;font-size:12px;text-align:left;width:100%;border-collapse:collapse;padding:3px 3px 3px 3px">

<tr style="text-align:center;font-weight:bold;background:#9CBCE2">

<td>143</td>

</tr>

<tr>

<td>

<table style="font-family:Arial,Verdana,Times;font-size:12px;text-align:left;width:100%;border-spacing:0px; padding:3px 3px 3px 3px">

<tr>

<td>FID</td>

<td>78</td>

</tr>

<tr bgcolor="#D4E4F3">

<td>F1_for_irr</td>

<td>0</td>

</tr>

<tr>

<td>Name</td>

<td>143</td>

</tr>

<tr bgcolor="#D4E4F3">

<td>Name_2</td>

<td>143</td>

</tr>

<tr>

<td>Name_1</td>

<td>143</td>

</tr>

<tr bgcolor="#D4E4F3">

<td>F1_for_i_1</td>

<td>0</td>

</tr>

<tr>

<td>notes</td>

<td>wheat</td>

</tr>

<tr bgcolor="#D4E4F3">

<td>new_number</td>

<td>2</td>

</tr>

<tr>

<td>elevation</td>

<td>885</td>

</tr>

</table>

</td>

</tr>

</table>

</body>

</html>]]></description>
				<styleUrl>#IconStyle09</styleUrl>
				<Point>
					<coordinates>-115.3495505265356,42.83098248895078,0</coordinates>
				</Point>
			</Placemark>
			<Placemark id="ID_00079">
				<name>144</name>
				<Snippet maxLines="0"></Snippet>
				<description><![CDATA[<html xmlns:fo="http://www.w3.org/1999/XSL/Format" xmlns:msxsl="urn:schemas-microsoft-com:xslt">

<head>

<META http-equiv="Content-Type" content="text/html">

<meta http-equiv="content-type" content="text/html; charset=UTF-8">

</head>

<body style="margin:0px 0px 0px 0px;overflow:auto;background:#FFFFFF;">

<table style="font-family:Arial,Verdana,Times;font-size:12px;text-align:left;width:100%;border-collapse:collapse;padding:3px 3px 3px 3px">

<tr style="text-align:center;font-weight:bold;background:#9CBCE2">

<td>144</td>

</tr>

<tr>

<td>

<table style="font-family:Arial,Verdana,Times;font-size:12px;text-align:left;width:100%;border-spacing:0px; padding:3px 3px 3px 3px">

<tr>

<td>FID</td>

<td>79</td>

</tr>

<tr bgcolor="#D4E4F3">

<td>F1_for_irr</td>

<td>0</td>

</tr>

<tr>

<td>Name</td>

<td>144</td>

</tr>

<tr bgcolor="#D4E4F3">

<td>Name_2</td>

<td>144</td>

</tr>

<tr>

<td>Name_1</td>

<td>144</td>

</tr>

<tr bgcolor="#D4E4F3">

<td>F1_for_i_1</td>

<td>0</td>

</tr>

<tr>

<td>notes</td>

<td>wheat/pasture</td>

</tr>

<tr bgcolor="#D4E4F3">

<td>new_number</td>

<td>2</td>

</tr>

<tr>

<td>elevation</td>

<td>943</td>

</tr>

</table>

</td>

</tr>

</table>

</body>

</html>]]></description>
				<styleUrl>#IconStyle09</styleUrl>
				<Point>
					<coordinates>-115.2173909448362,42.92918981615713,0</coordinates>
				</Point>
			</Placemark>
			<Placemark id="ID_00080">
				<name>145</name>
				<Snippet maxLines="0"></Snippet>
				<description><![CDATA[<html xmlns:fo="http://www.w3.org/1999/XSL/Format" xmlns:msxsl="urn:schemas-microsoft-com:xslt">

<head>

<META http-equiv="Content-Type" content="text/html">

<meta http-equiv="content-type" content="text/html; charset=UTF-8">

</head>

<body style="margin:0px 0px 0px 0px;overflow:auto;background:#FFFFFF;">

<table style="font-family:Arial,Verdana,Times;font-size:12px;text-align:left;width:100%;border-collapse:collapse;padding:3px 3px 3px 3px">

<tr style="text-align:center;font-weight:bold;background:#9CBCE2">

<td>145</td>

</tr>

<tr>

<td>

<table style="font-family:Arial,Verdana,Times;font-size:12px;text-align:left;width:100%;border-spacing:0px; padding:3px 3px 3px 3px">

<tr>

<td>FID</td>

<td>80</td>

</tr>

<tr bgcolor="#D4E4F3">

<td>F1_for_irr</td>

<td>0</td>

</tr>

<tr>

<td>Name</td>

<td>145</td>

</tr>

<tr bgcolor="#D4E4F3">

<td>Name_2</td>

<td>145</td>

</tr>

<tr>

<td>Name_1</td>

<td>145</td>

</tr>

<tr bgcolor="#D4E4F3">

<td>F1_for_i_1</td>

<td>0</td>

</tr>

<tr>

<td>notes</td>

<td>wheat</td>

</tr>

<tr bgcolor="#D4E4F3">

<td>new_number</td>

<td>2</td>

</tr>

<tr>

<td>elevation</td>

<td>1448</td>

</tr>

</table>

</td>

</tr>

</table>

</body>

</html>]]></description>
				<styleUrl>#IconStyle09</styleUrl>
				<Point>
					<coordinates>-115.5899536590341,43.46537857566079,0</coordinates>
				</Point>
			</Placemark>
			<Placemark id="ID_00081">
				<name>146</name>
				<Snippet maxLines="0"></Snippet>
				<description><![CDATA[<html xmlns:fo="http://www.w3.org/1999/XSL/Format" xmlns:msxsl="urn:schemas-microsoft-com:xslt">

<head>

<META http-equiv="Content-Type" content="text/html">

<meta http-equiv="content-type" content="text/html; charset=UTF-8">

</head>

<body style="margin:0px 0px 0px 0px;overflow:auto;background:#FFFFFF;">

<table style="font-family:Arial,Verdana,Times;font-size:12px;text-align:left;width:100%;border-collapse:collapse;padding:3px 3px 3px 3px">

<tr style="text-align:center;font-weight:bold;background:#9CBCE2">

<td>146</td>

</tr>

<tr>

<td>

<table style="font-family:Arial,Verdana,Times;font-size:12px;text-align:left;width:100%;border-spacing:0px; padding:3px 3px 3px 3px">

<tr>

<td>FID</td>

<td>81</td>

</tr>

<tr bgcolor="#D4E4F3">

<td>F1_for_irr</td>

<td>0</td>

</tr>

<tr>

<td>Name</td>

<td>146</td>

</tr>

<tr bgcolor="#D4E4F3">

<td>Name_2</td>

<td>146</td>

</tr>

<tr>

<td>Name_1</td>

<td>146</td>

</tr>

<tr bgcolor="#D4E4F3">

<td>F1_for_i_1</td>

<td>0</td>

</tr>

<tr>

<td>notes</td>

<td>wheat</td>

</tr>

<tr bgcolor="#D4E4F3">

<td>new_number</td>

<td>2</td>

</tr>

<tr>

<td>elevation</td>

<td>1436</td>

</tr>

</table>

</td>

</tr>

</table>

</body>

</html>]]></description>
				<styleUrl>#IconStyle09</styleUrl>
				<Point>
					<coordinates>-115.5984139943104,43.48603917586735,0</coordinates>
				</Point>
			</Placemark>
			<Placemark id="ID_00082">
				<name>147</name>
				<Snippet maxLines="0"></Snippet>
				<description><![CDATA[<html xmlns:fo="http://www.w3.org/1999/XSL/Format" xmlns:msxsl="urn:schemas-microsoft-com:xslt">

<head>

<META http-equiv="Content-Type" content="text/html">

<meta http-equiv="content-type" content="text/html; charset=UTF-8">

</head>

<body style="margin:0px 0px 0px 0px;overflow:auto;background:#FFFFFF;">

<table style="font-family:Arial,Verdana,Times;font-size:12px;text-align:left;width:100%;border-collapse:collapse;padding:3px 3px 3px 3px">

<tr style="text-align:center;font-weight:bold;background:#9CBCE2">

<td>147</td>

</tr>

<tr>

<td>

<table style="font-family:Arial,Verdana,Times;font-size:12px;text-align:left;width:100%;border-spacing:0px; padding:3px 3px 3px 3px">

<tr>

<td>FID</td>

<td>82</td>

</tr>

<tr bgcolor="#D4E4F3">

<td>F1_for_irr</td>

<td>0</td>

</tr>

<tr>

<td>Name</td>

<td>147</td>

</tr>

<tr bgcolor="#D4E4F3">

<td>Name_2</td>

<td>147</td>

</tr>

<tr>

<td>Name_1</td>

<td>147</td>

</tr>

<tr bgcolor="#D4E4F3">

<td>F1_for_i_1</td>

<td>0</td>

</tr>

<tr>

<td>notes</td>

<td>wheat</td>

</tr>

<tr bgcolor="#D4E4F3">

<td>new_number</td>

<td>2</td>

</tr>

<tr>

<td>elevation</td>

<td>1456</td>

</tr>

</table>

</td>

</tr>

</table>

</body>

</html>]]></description>
				<styleUrl>#IconStyle09</styleUrl>
				<Point>
					<coordinates>-115.5714524497707,43.46149318786041,0</coordinates>
				</Point>
			</Placemark>
			<Placemark id="ID_00083">
				<name>148</name>
				<Snippet maxLines="0"></Snippet>
				<description><![CDATA[<html xmlns:fo="http://www.w3.org/1999/XSL/Format" xmlns:msxsl="urn:schemas-microsoft-com:xslt">

<head>

<META http-equiv="Content-Type" content="text/html">

<meta http-equiv="content-type" content="text/html; charset=UTF-8">

</head>

<body style="margin:0px 0px 0px 0px;overflow:auto;background:#FFFFFF;">

<table style="font-family:Arial,Verdana,Times;font-size:12px;text-align:left;width:100%;border-collapse:collapse;padding:3px 3px 3px 3px">

<tr style="text-align:center;font-weight:bold;background:#9CBCE2">

<td>148</td>

</tr>

<tr>

<td>

<table style="font-family:Arial,Verdana,Times;font-size:12px;text-align:left;width:100%;border-spacing:0px; padding:3px 3px 3px 3px">

<tr>

<td>FID</td>

<td>83</td>

</tr>

<tr bgcolor="#D4E4F3">

<td>F1_for_irr</td>

<td>1</td>

</tr>

<tr>

<td>Name</td>

<td>148</td>

</tr>

<tr bgcolor="#D4E4F3">

<td>Name_2</td>

<td>148</td>

</tr>

<tr>

<td>Name_1</td>

<td>148</td>

</tr>

<tr bgcolor="#D4E4F3">

<td>F1_for_i_1</td>

<td>1</td>

</tr>

<tr>

<td>notes</td>

<td></td>

</tr>

<tr bgcolor="#D4E4F3">

<td>new_number</td>

<td>1</td>

</tr>

<tr>

<td>elevation</td>

<td>1053</td>

</tr>

</table>

</td>

</tr>

</table>

</body>

</html>]]></description>
				<styleUrl>#IconStyle00</styleUrl>
				<Point>
					<coordinates>-114.6220252748465,42.68454752594761,0</coordinates>
				</Point>
			</Placemark>
			<Placemark id="ID_00084">
				<name>149</name>
				<Snippet maxLines="0"></Snippet>
				<description><![CDATA[<html xmlns:fo="http://www.w3.org/1999/XSL/Format" xmlns:msxsl="urn:schemas-microsoft-com:xslt">

<head>

<META http-equiv="Content-Type" content="text/html">

<meta http-equiv="content-type" content="text/html; charset=UTF-8">

</head>

<body style="margin:0px 0px 0px 0px;overflow:auto;background:#FFFFFF;">

<table style="font-family:Arial,Verdana,Times;font-size:12px;text-align:left;width:100%;border-collapse:collapse;padding:3px 3px 3px 3px">

<tr style="text-align:center;font-weight:bold;background:#9CBCE2">

<td>149</td>

</tr>

<tr>

<td>

<table style="font-family:Arial,Verdana,Times;font-size:12px;text-align:left;width:100%;border-spacing:0px; padding:3px 3px 3px 3px">

<tr>

<td>FID</td>

<td>84</td>

</tr>

<tr bgcolor="#D4E4F3">

<td>F1_for_irr</td>

<td>1</td>

</tr>

<tr>

<td>Name</td>

<td>149</td>

</tr>

<tr bgcolor="#D4E4F3">

<td>Name_2</td>

<td>149</td>

</tr>

<tr>

<td>Name_1</td>

<td>149</td>

</tr>

<tr bgcolor="#D4E4F3">

<td>F1_for_i_1</td>

<td>1</td>

</tr>

<tr>

<td>notes</td>

<td></td>

</tr>

<tr bgcolor="#D4E4F3">

<td>new_number</td>

<td>1</td>

</tr>

<tr>

<td>elevation</td>

<td>1066</td>

</tr>

</table>

</td>

</tr>

</table>

</body>

</html>]]></description>
				<styleUrl>#IconStyle00</styleUrl>
				<Point>
					<coordinates>-114.649839204016,42.78613882214899,0</coordinates>
				</Point>
			</Placemark>
			<Placemark id="ID_00085">
				<name>150</name>
				<Snippet maxLines="0"></Snippet>
				<description><![CDATA[<html xmlns:fo="http://www.w3.org/1999/XSL/Format" xmlns:msxsl="urn:schemas-microsoft-com:xslt">

<head>

<META http-equiv="Content-Type" content="text/html">

<meta http-equiv="content-type" content="text/html; charset=UTF-8">

</head>

<body style="margin:0px 0px 0px 0px;overflow:auto;background:#FFFFFF;">

<table style="font-family:Arial,Verdana,Times;font-size:12px;text-align:left;width:100%;border-collapse:collapse;padding:3px 3px 3px 3px">

<tr style="text-align:center;font-weight:bold;background:#9CBCE2">

<td>150</td>

</tr>

<tr>

<td>

<table style="font-family:Arial,Verdana,Times;font-size:12px;text-align:left;width:100%;border-spacing:0px; padding:3px 3px 3px 3px">

<tr>

<td>FID</td>

<td>85</td>

</tr>

<tr bgcolor="#D4E4F3">

<td>F1_for_irr</td>

<td>1</td>

</tr>

<tr>

<td>Name</td>

<td>150</td>

</tr>

<tr bgcolor="#D4E4F3">

<td>Name_2</td>

<td>150</td>

</tr>

<tr>

<td>Name_1</td>

<td>150</td>

</tr>

<tr bgcolor="#D4E4F3">

<td>F1_for_i_1</td>

<td>1</td>

</tr>

<tr>

<td>notes</td>

<td></td>

</tr>

<tr bgcolor="#D4E4F3">

<td>new_number</td>

<td>1</td>

</tr>

<tr>

<td>elevation</td>

<td>1047</td>

</tr>

</table>

</td>

</tr>

</table>

</body>

</html>]]></description>
				<styleUrl>#IconStyle00</styleUrl>
				<Point>
					<coordinates>-114.7757359492546,42.847267205717,0</coordinates>
				</Point>
			</Placemark>
			<Placemark id="ID_00086">
				<name>151</name>
				<Snippet maxLines="0"></Snippet>
				<description><![CDATA[<html xmlns:fo="http://www.w3.org/1999/XSL/Format" xmlns:msxsl="urn:schemas-microsoft-com:xslt">

<head>

<META http-equiv="Content-Type" content="text/html">

<meta http-equiv="content-type" content="text/html; charset=UTF-8">

</head>

<body style="margin:0px 0px 0px 0px;overflow:auto;background:#FFFFFF;">

<table style="font-family:Arial,Verdana,Times;font-size:12px;text-align:left;width:100%;border-collapse:collapse;padding:3px 3px 3px 3px">

<tr style="text-align:center;font-weight:bold;background:#9CBCE2">

<td>151</td>

</tr>

<tr>

<td>

<table style="font-family:Arial,Verdana,Times;font-size:12px;text-align:left;width:100%;border-spacing:0px; padding:3px 3px 3px 3px">

<tr>

<td>FID</td>

<td>86</td>

</tr>

<tr bgcolor="#D4E4F3">

<td>F1_for_irr</td>

<td>1</td>

</tr>

<tr>

<td>Name</td>

<td>151</td>

</tr>

<tr bgcolor="#D4E4F3">

<td>Name_2</td>

<td>151</td>

</tr>

<tr>

<td>Name_1</td>

<td>151</td>

</tr>

<tr bgcolor="#D4E4F3">

<td>F1_for_i_1</td>

<td>1</td>

</tr>

<tr>

<td>notes</td>

<td></td>

</tr>

<tr bgcolor="#D4E4F3">

<td>new_number</td>

<td>1</td>

</tr>

<tr>

<td>elevation</td>

<td>1021</td>

</tr>

</table>

</td>

</tr>

</table>

</body>

</html>]]></description>
				<styleUrl>#IconStyle00</styleUrl>
				<Point>
					<coordinates>-114.8859340488173,42.92011566480613,0</coordinates>
				</Point>
			</Placemark>
			<Placemark id="ID_00087">
				<name>152</name>
				<Snippet maxLines="0"></Snippet>
				<description><![CDATA[<html xmlns:fo="http://www.w3.org/1999/XSL/Format" xmlns:msxsl="urn:schemas-microsoft-com:xslt">

<head>

<META http-equiv="Content-Type" content="text/html">

<meta http-equiv="content-type" content="text/html; charset=UTF-8">

</head>

<body style="margin:0px 0px 0px 0px;overflow:auto;background:#FFFFFF;">

<table style="font-family:Arial,Verdana,Times;font-size:12px;text-align:left;width:100%;border-collapse:collapse;padding:3px 3px 3px 3px">

<tr style="text-align:center;font-weight:bold;background:#9CBCE2">

<td>152</td>

</tr>

<tr>

<td>

<table style="font-family:Arial,Verdana,Times;font-size:12px;text-align:left;width:100%;border-spacing:0px; padding:3px 3px 3px 3px">

<tr>

<td>FID</td>

<td>87</td>

</tr>

<tr bgcolor="#D4E4F3">

<td>F1_for_irr</td>

<td>1</td>

</tr>

<tr>

<td>Name</td>

<td>152</td>

</tr>

<tr bgcolor="#D4E4F3">

<td>Name_2</td>

<td>152</td>

</tr>

<tr>

<td>Name_1</td>

<td>152</td>

</tr>

<tr bgcolor="#D4E4F3">

<td>F1_for_i_1</td>

<td>1</td>

</tr>

<tr>

<td>notes</td>

<td></td>

</tr>

<tr bgcolor="#D4E4F3">

<td>new_number</td>

<td>1</td>

</tr>

<tr>

<td>elevation</td>

<td>1129</td>

</tr>

</table>

</td>

</tr>

</table>

</body>

</html>]]></description>
				<styleUrl>#IconStyle00</styleUrl>
				<Point>
					<coordinates>-114.7391164215856,42.91040232390816,0</coordinates>
				</Point>
			</Placemark>
			<Placemark id="ID_00088">
				<name>154</name>
				<Snippet maxLines="0"></Snippet>
				<description><![CDATA[<html xmlns:fo="http://www.w3.org/1999/XSL/Format" xmlns:msxsl="urn:schemas-microsoft-com:xslt">

<head>

<META http-equiv="Content-Type" content="text/html">

<meta http-equiv="content-type" content="text/html; charset=UTF-8">

</head>

<body style="margin:0px 0px 0px 0px;overflow:auto;background:#FFFFFF;">

<table style="font-family:Arial,Verdana,Times;font-size:12px;text-align:left;width:100%;border-collapse:collapse;padding:3px 3px 3px 3px">

<tr style="text-align:center;font-weight:bold;background:#9CBCE2">

<td>154</td>

</tr>

<tr>

<td>

<table style="font-family:Arial,Verdana,Times;font-size:12px;text-align:left;width:100%;border-spacing:0px; padding:3px 3px 3px 3px">

<tr>

<td>FID</td>

<td>88</td>

</tr>

<tr bgcolor="#D4E4F3">

<td>F1_for_irr</td>

<td>1</td>

</tr>

<tr>

<td>Name</td>

<td>154</td>

</tr>

<tr bgcolor="#D4E4F3">

<td>Name_2</td>

<td>154</td>

</tr>

<tr>

<td>Name_1</td>

<td>154</td>

</tr>

<tr bgcolor="#D4E4F3">

<td>F1_for_i_1</td>

<td>1</td>

</tr>

<tr>

<td>notes</td>

<td></td>

</tr>

<tr bgcolor="#D4E4F3">

<td>new_number</td>

<td>1</td>

</tr>

<tr>

<td>elevation</td>

<td>1003</td>

</tr>

</table>

</td>

</tr>

</table>

</body>

</html>]]></description>
				<styleUrl>#IconStyle00</styleUrl>
				<Point>
					<coordinates>-114.7618406879973,42.75755997731113,0</coordinates>
				</Point>
			</Placemark>
			<Placemark id="ID_00089">
				<name>155</name>
				<Snippet maxLines="0"></Snippet>
				<description><![CDATA[<html xmlns:fo="http://www.w3.org/1999/XSL/Format" xmlns:msxsl="urn:schemas-microsoft-com:xslt">

<head>

<META http-equiv="Content-Type" content="text/html">

<meta http-equiv="content-type" content="text/html; charset=UTF-8">

</head>

<body style="margin:0px 0px 0px 0px;overflow:auto;background:#FFFFFF;">

<table style="font-family:Arial,Verdana,Times;font-size:12px;text-align:left;width:100%;border-collapse:collapse;padding:3px 3px 3px 3px">

<tr style="text-align:center;font-weight:bold;background:#9CBCE2">

<td>155</td>

</tr>

<tr>

<td>

<table style="font-family:Arial,Verdana,Times;font-size:12px;text-align:left;width:100%;border-spacing:0px; padding:3px 3px 3px 3px">

<tr>

<td>FID</td>

<td>89</td>

</tr>

<tr bgcolor="#D4E4F3">

<td>F1_for_irr</td>

<td>1</td>

</tr>

<tr>

<td>Name</td>

<td>155</td>

</tr>

<tr bgcolor="#D4E4F3">

<td>Name_2</td>

<td>155</td>

</tr>

<tr>

<td>Name_1</td>

<td>155</td>

</tr>

<tr bgcolor="#D4E4F3">

<td>F1_for_i_1</td>

<td>1</td>

</tr>

<tr>

<td>notes</td>

<td></td>

</tr>

<tr bgcolor="#D4E4F3">

<td>new_number</td>

<td>1</td>

</tr>

<tr>

<td>elevation</td>

<td>1003</td>

</tr>

</table>

</td>

</tr>

</table>

</body>

</html>]]></description>
				<styleUrl>#IconStyle00</styleUrl>
				<Point>
					<coordinates>-114.7385989121101,42.69233952375009,0</coordinates>
				</Point>
			</Placemark>
			<Placemark id="ID_00090">
				<name>156</name>
				<Snippet maxLines="0"></Snippet>
				<description><![CDATA[<html xmlns:fo="http://www.w3.org/1999/XSL/Format" xmlns:msxsl="urn:schemas-microsoft-com:xslt">

<head>

<META http-equiv="Content-Type" content="text/html">

<meta http-equiv="content-type" content="text/html; charset=UTF-8">

</head>

<body style="margin:0px 0px 0px 0px;overflow:auto;background:#FFFFFF;">

<table style="font-family:Arial,Verdana,Times;font-size:12px;text-align:left;width:100%;border-collapse:collapse;padding:3px 3px 3px 3px">

<tr style="text-align:center;font-weight:bold;background:#9CBCE2">

<td>156</td>

</tr>

<tr>

<td>

<table style="font-family:Arial,Verdana,Times;font-size:12px;text-align:left;width:100%;border-spacing:0px; padding:3px 3px 3px 3px">

<tr>

<td>FID</td>

<td>90</td>

</tr>

<tr bgcolor="#D4E4F3">

<td>F1_for_irr</td>

<td>1</td>

</tr>

<tr>

<td>Name</td>

<td>156</td>

</tr>

<tr bgcolor="#D4E4F3">

<td>Name_2</td>

<td>156</td>

</tr>

<tr>

<td>Name_1</td>

<td>156</td>

</tr>

<tr bgcolor="#D4E4F3">

<td>F1_for_i_1</td>

<td>1</td>

</tr>

<tr>

<td>notes</td>

<td></td>

</tr>

<tr bgcolor="#D4E4F3">

<td>new_number</td>

<td>1</td>

</tr>

<tr>

<td>elevation</td>

<td>985</td>

</tr>

</table>

</td>

</tr>

</table>

</body>

</html>]]></description>
				<styleUrl>#IconStyle00</styleUrl>
				<Point>
					<coordinates>-114.840798092458,42.77222377220937,0</coordinates>
				</Point>
			</Placemark>
			<Placemark id="ID_00091">
				<name>157</name>
				<Snippet maxLines="0"></Snippet>
				<description><![CDATA[<html xmlns:fo="http://www.w3.org/1999/XSL/Format" xmlns:msxsl="urn:schemas-microsoft-com:xslt">

<head>

<META http-equiv="Content-Type" content="text/html">

<meta http-equiv="content-type" content="text/html; charset=UTF-8">

</head>

<body style="margin:0px 0px 0px 0px;overflow:auto;background:#FFFFFF;">

<table style="font-family:Arial,Verdana,Times;font-size:12px;text-align:left;width:100%;border-collapse:collapse;padding:3px 3px 3px 3px">

<tr style="text-align:center;font-weight:bold;background:#9CBCE2">

<td>157</td>

</tr>

<tr>

<td>

<table style="font-family:Arial,Verdana,Times;font-size:12px;text-align:left;width:100%;border-spacing:0px; padding:3px 3px 3px 3px">

<tr>

<td>FID</td>

<td>91</td>

</tr>

<tr bgcolor="#D4E4F3">

<td>F1_for_irr</td>

<td>1</td>

</tr>

<tr>

<td>Name</td>

<td>157</td>

</tr>

<tr bgcolor="#D4E4F3">

<td>Name_2</td>

<td>157</td>

</tr>

<tr>

<td>Name_1</td>

<td>157</td>

</tr>

<tr bgcolor="#D4E4F3">

<td>F1_for_i_1</td>

<td>1</td>

</tr>

<tr>

<td>notes</td>

<td></td>

</tr>

<tr bgcolor="#D4E4F3">

<td>new_number</td>

<td>1</td>

</tr>

<tr>

<td>elevation</td>

<td>1026</td>

</tr>

</table>

</td>

</tr>

</table>

</body>

</html>]]></description>
				<styleUrl>#IconStyle00</styleUrl>
				<Point>
					<coordinates>-114.8062815817296,42.85209806787157,0</coordinates>
				</Point>
			</Placemark>
			<Placemark id="ID_00092">
				<name>158</name>
				<Snippet maxLines="0"></Snippet>
				<description><![CDATA[<html xmlns:fo="http://www.w3.org/1999/XSL/Format" xmlns:msxsl="urn:schemas-microsoft-com:xslt">

<head>

<META http-equiv="Content-Type" content="text/html">

<meta http-equiv="content-type" content="text/html; charset=UTF-8">

</head>

<body style="margin:0px 0px 0px 0px;overflow:auto;background:#FFFFFF;">

<table style="font-family:Arial,Verdana,Times;font-size:12px;text-align:left;width:100%;border-collapse:collapse;padding:3px 3px 3px 3px">

<tr style="text-align:center;font-weight:bold;background:#9CBCE2">

<td>158</td>

</tr>

<tr>

<td>

<table style="font-family:Arial,Verdana,Times;font-size:12px;text-align:left;width:100%;border-spacing:0px; padding:3px 3px 3px 3px">

<tr>

<td>FID</td>

<td>92</td>

</tr>

<tr bgcolor="#D4E4F3">

<td>F1_for_irr</td>

<td>0</td>

</tr>

<tr>

<td>Name</td>

<td>158</td>

</tr>

<tr bgcolor="#D4E4F3">

<td>Name_2</td>

<td>158</td>

</tr>

<tr>

<td>Name_1</td>

<td>158</td>

</tr>

<tr bgcolor="#D4E4F3">

<td>F1_for_i_1</td>

<td>0</td>

</tr>

<tr>

<td>notes</td>

<td>variable</td>

</tr>

<tr bgcolor="#D4E4F3">

<td>new_number</td>

<td>2</td>

</tr>

<tr>

<td>elevation</td>

<td>1481</td>

</tr>

</table>

</td>

</tr>

</table>

</body>

</html>]]></description>
				<styleUrl>#IconStyle09</styleUrl>
				<Point>
					<coordinates>-114.6493685177429,43.1368223502713,0</coordinates>
				</Point>
			</Placemark>
			<Placemark id="ID_00093">
				<name>159</name>
				<Snippet maxLines="0"></Snippet>
				<description><![CDATA[<html xmlns:fo="http://www.w3.org/1999/XSL/Format" xmlns:msxsl="urn:schemas-microsoft-com:xslt">

<head>

<META http-equiv="Content-Type" content="text/html">

<meta http-equiv="content-type" content="text/html; charset=UTF-8">

</head>

<body style="margin:0px 0px 0px 0px;overflow:auto;background:#FFFFFF;">

<table style="font-family:Arial,Verdana,Times;font-size:12px;text-align:left;width:100%;border-collapse:collapse;padding:3px 3px 3px 3px">

<tr style="text-align:center;font-weight:bold;background:#9CBCE2">

<td>159</td>

</tr>

<tr>

<td>

<table style="font-family:Arial,Verdana,Times;font-size:12px;text-align:left;width:100%;border-spacing:0px; padding:3px 3px 3px 3px">

<tr>

<td>FID</td>

<td>93</td>

</tr>

<tr bgcolor="#D4E4F3">

<td>F1_for_irr</td>

<td>0</td>

</tr>

<tr>

<td>Name</td>

<td>159</td>

</tr>

<tr bgcolor="#D4E4F3">

<td>Name_2</td>

<td>159</td>

</tr>

<tr>

<td>Name_1</td>

<td>159</td>

</tr>

<tr bgcolor="#D4E4F3">

<td>F1_for_i_1</td>

<td>0</td>

</tr>

<tr>

<td>notes</td>

<td>variable</td>

</tr>

<tr bgcolor="#D4E4F3">

<td>new_number</td>

<td>2</td>

</tr>

<tr>

<td>elevation</td>

<td>1017</td>

</tr>

</table>

</td>

</tr>

</table>

</body>

</html>]]></description>
				<styleUrl>#IconStyle09</styleUrl>
				<Point>
					<coordinates>-114.9166203640385,43.048436976885,0</coordinates>
				</Point>
			</Placemark>
			<Placemark id="ID_00094">
				<name>163</name>
				<Snippet maxLines="0"></Snippet>
				<description><![CDATA[<html xmlns:fo="http://www.w3.org/1999/XSL/Format" xmlns:msxsl="urn:schemas-microsoft-com:xslt">

<head>

<META http-equiv="Content-Type" content="text/html">

<meta http-equiv="content-type" content="text/html; charset=UTF-8">

</head>

<body style="margin:0px 0px 0px 0px;overflow:auto;background:#FFFFFF;">

<table style="font-family:Arial,Verdana,Times;font-size:12px;text-align:left;width:100%;border-collapse:collapse;padding:3px 3px 3px 3px">

<tr style="text-align:center;font-weight:bold;background:#9CBCE2">

<td>163</td>

</tr>

<tr>

<td>

<table style="font-family:Arial,Verdana,Times;font-size:12px;text-align:left;width:100%;border-spacing:0px; padding:3px 3px 3px 3px">

<tr>

<td>FID</td>

<td>94</td>

</tr>

<tr bgcolor="#D4E4F3">

<td>F1_for_irr</td>

<td>0</td>

</tr>

<tr>

<td>Name</td>

<td>163</td>

</tr>

<tr bgcolor="#D4E4F3">

<td>Name_2</td>

<td>163</td>

</tr>

<tr>

<td>Name_1</td>

<td>163</td>

</tr>

<tr bgcolor="#D4E4F3">

<td>F1_for_i_1</td>

<td>0</td>

</tr>

<tr>

<td>notes</td>

<td></td>

</tr>

<tr bgcolor="#D4E4F3">

<td>new_number</td>

<td>0</td>

</tr>

<tr>

<td>elevation</td>

<td>963</td>

</tr>

</table>

</td>

</tr>

</table>

</body>

</html>]]></description>
				<styleUrl>#IconStyle09</styleUrl>
				<Point>
					<coordinates>-114.8430309373279,42.75226585728353,0</coordinates>
				</Point>
			</Placemark>
			<Placemark id="ID_00095">
				<name>164</name>
				<Snippet maxLines="0"></Snippet>
				<description><![CDATA[<html xmlns:fo="http://www.w3.org/1999/XSL/Format" xmlns:msxsl="urn:schemas-microsoft-com:xslt">

<head>

<META http-equiv="Content-Type" content="text/html">

<meta http-equiv="content-type" content="text/html; charset=UTF-8">

</head>

<body style="margin:0px 0px 0px 0px;overflow:auto;background:#FFFFFF;">

<table style="font-family:Arial,Verdana,Times;font-size:12px;text-align:left;width:100%;border-collapse:collapse;padding:3px 3px 3px 3px">

<tr style="text-align:center;font-weight:bold;background:#9CBCE2">

<td>164</td>

</tr>

<tr>

<td>

<table style="font-family:Arial,Verdana,Times;font-size:12px;text-align:left;width:100%;border-spacing:0px; padding:3px 3px 3px 3px">

<tr>

<td>FID</td>

<td>95</td>

</tr>

<tr bgcolor="#D4E4F3">

<td>F1_for_irr</td>

<td>0</td>

</tr>

<tr>

<td>Name</td>

<td>164</td>

</tr>

<tr bgcolor="#D4E4F3">

<td>Name_2</td>

<td>164</td>

</tr>

<tr>

<td>Name_1</td>

<td>164</td>

</tr>

<tr bgcolor="#D4E4F3">

<td>F1_for_i_1</td>

<td>0</td>

</tr>

<tr>

<td>notes</td>

<td></td>

</tr>

<tr bgcolor="#D4E4F3">

<td>new_number</td>

<td>0</td>

</tr>

<tr>

<td>elevation</td>

<td>1006</td>

</tr>

</table>

</td>

</tr>

</table>

</body>

</html>]]></description>
				<styleUrl>#IconStyle09</styleUrl>
				<Point>
					<coordinates>-114.8235518637275,42.79907399866613,0</coordinates>
				</Point>
			</Placemark>
			<Placemark id="ID_00096">
				<name>165</name>
				<Snippet maxLines="0"></Snippet>
				<description><![CDATA[<html xmlns:fo="http://www.w3.org/1999/XSL/Format" xmlns:msxsl="urn:schemas-microsoft-com:xslt">

<head>

<META http-equiv="Content-Type" content="text/html">

<meta http-equiv="content-type" content="text/html; charset=UTF-8">

</head>

<body style="margin:0px 0px 0px 0px;overflow:auto;background:#FFFFFF;">

<table style="font-family:Arial,Verdana,Times;font-size:12px;text-align:left;width:100%;border-collapse:collapse;padding:3px 3px 3px 3px">

<tr style="text-align:center;font-weight:bold;background:#9CBCE2">

<td>165</td>

</tr>

<tr>

<td>

<table style="font-family:Arial,Verdana,Times;font-size:12px;text-align:left;width:100%;border-spacing:0px; padding:3px 3px 3px 3px">

<tr>

<td>FID</td>

<td>96</td>

</tr>

<tr bgcolor="#D4E4F3">

<td>F1_for_irr</td>

<td>0</td>

</tr>

<tr>

<td>Name</td>

<td>165</td>

</tr>

<tr bgcolor="#D4E4F3">

<td>Name_2</td>

<td>165</td>

</tr>

<tr>

<td>Name_1</td>

<td>165</td>

</tr>

<tr bgcolor="#D4E4F3">

<td>F1_for_i_1</td>

<td>0</td>

</tr>

<tr>

<td>notes</td>

<td></td>

</tr>

<tr bgcolor="#D4E4F3">

<td>new_number</td>

<td>0</td>

</tr>

<tr>

<td>elevation</td>

<td>996</td>

</tr>

</table>

</td>

</tr>

</table>

</body>

</html>]]></description>
				<styleUrl>#IconStyle09</styleUrl>
				<Point>
					<coordinates>-114.8880250004534,42.88185690777016,0</coordinates>
				</Point>
			</Placemark>
			<Placemark id="ID_00097">
				<name>166</name>
				<Snippet maxLines="0"></Snippet>
				<description><![CDATA[<html xmlns:fo="http://www.w3.org/1999/XSL/Format" xmlns:msxsl="urn:schemas-microsoft-com:xslt">

<head>

<META http-equiv="Content-Type" content="text/html">

<meta http-equiv="content-type" content="text/html; charset=UTF-8">

</head>

<body style="margin:0px 0px 0px 0px;overflow:auto;background:#FFFFFF;">

<table style="font-family:Arial,Verdana,Times;font-size:12px;text-align:left;width:100%;border-collapse:collapse;padding:3px 3px 3px 3px">

<tr style="text-align:center;font-weight:bold;background:#9CBCE2">

<td>166</td>

</tr>

<tr>

<td>

<table style="font-family:Arial,Verdana,Times;font-size:12px;text-align:left;width:100%;border-spacing:0px; padding:3px 3px 3px 3px">

<tr>

<td>FID</td>

<td>97</td>

</tr>

<tr bgcolor="#D4E4F3">

<td>F1_for_irr</td>

<td>0</td>

</tr>

<tr>

<td>Name</td>

<td>166</td>

</tr>

<tr bgcolor="#D4E4F3">

<td>Name_2</td>

<td>166</td>

</tr>

<tr>

<td>Name_1</td>

<td>166</td>

</tr>

<tr bgcolor="#D4E4F3">

<td>F1_for_i_1</td>

<td>0</td>

</tr>

<tr>

<td>notes</td>

<td></td>

</tr>

<tr bgcolor="#D4E4F3">

<td>new_number</td>

<td>0</td>

</tr>

<tr>

<td>elevation</td>

<td>1029</td>

</tr>

</table>

</td>

</tr>

</table>

</body>

</html>]]></description>
				<styleUrl>#IconStyle09</styleUrl>
				<Point>
					<coordinates>-114.8116940615317,42.9077702115261,0</coordinates>
				</Point>
			</Placemark>
			<Placemark id="ID_00098">
				<name>168</name>
				<Snippet maxLines="0"></Snippet>
				<description><![CDATA[<html xmlns:fo="http://www.w3.org/1999/XSL/Format" xmlns:msxsl="urn:schemas-microsoft-com:xslt">

<head>

<META http-equiv="Content-Type" content="text/html">

<meta http-equiv="content-type" content="text/html; charset=UTF-8">

</head>

<body style="margin:0px 0px 0px 0px;overflow:auto;background:#FFFFFF;">

<table style="font-family:Arial,Verdana,Times;font-size:12px;text-align:left;width:100%;border-collapse:collapse;padding:3px 3px 3px 3px">

<tr style="text-align:center;font-weight:bold;background:#9CBCE2">

<td>168</td>

</tr>

<tr>

<td>

<table style="font-family:Arial,Verdana,Times;font-size:12px;text-align:left;width:100%;border-spacing:0px; padding:3px 3px 3px 3px">

<tr>

<td>FID</td>

<td>98</td>

</tr>

<tr bgcolor="#D4E4F3">

<td>F1_for_irr</td>

<td>1</td>

</tr>

<tr>

<td>Name</td>

<td>168</td>

</tr>

<tr bgcolor="#D4E4F3">

<td>Name_2</td>

<td>168</td>

</tr>

<tr>

<td>Name_1</td>

<td>168</td>

</tr>

<tr bgcolor="#D4E4F3">

<td>F1_for_i_1</td>

<td>1</td>

</tr>

<tr>

<td>notes</td>

<td></td>

</tr>

<tr bgcolor="#D4E4F3">

<td>new_number</td>

<td>1</td>

</tr>

<tr>

<td>elevation</td>

<td>1249</td>

</tr>

</table>

</td>

</tr>

</table>

</body>

</html>]]></description>
				<styleUrl>#IconStyle00</styleUrl>
				<Point>
					<coordinates>-114.094889332077,42.58077821474285,0</coordinates>
				</Point>
			</Placemark>
			<Placemark id="ID_00099">
				<name>169</name>
				<Snippet maxLines="0"></Snippet>
				<description><![CDATA[<html xmlns:fo="http://www.w3.org/1999/XSL/Format" xmlns:msxsl="urn:schemas-microsoft-com:xslt">

<head>

<META http-equiv="Content-Type" content="text/html">

<meta http-equiv="content-type" content="text/html; charset=UTF-8">

</head>

<body style="margin:0px 0px 0px 0px;overflow:auto;background:#FFFFFF;">

<table style="font-family:Arial,Verdana,Times;font-size:12px;text-align:left;width:100%;border-collapse:collapse;padding:3px 3px 3px 3px">

<tr style="text-align:center;font-weight:bold;background:#9CBCE2">

<td>169</td>

</tr>

<tr>

<td>

<table style="font-family:Arial,Verdana,Times;font-size:12px;text-align:left;width:100%;border-spacing:0px; padding:3px 3px 3px 3px">

<tr>

<td>FID</td>

<td>99</td>

</tr>

<tr bgcolor="#D4E4F3">

<td>F1_for_irr</td>

<td>1</td>

</tr>

<tr>

<td>Name</td>

<td>169</td>

</tr>

<tr bgcolor="#D4E4F3">

<td>Name_2</td>

<td>169</td>

</tr>

<tr>

<td>Name_1</td>

<td>169</td>

</tr>

<tr bgcolor="#D4E4F3">

<td>F1_for_i_1</td>

<td>1</td>

</tr>

<tr>

<td>notes</td>

<td></td>

</tr>

<tr bgcolor="#D4E4F3">

<td>new_number</td>

<td>1</td>

</tr>

<tr>

<td>elevation</td>

<td>1215</td>

</tr>

</table>

</td>

</tr>

</table>

</body>

</html>]]></description>
				<styleUrl>#IconStyle00</styleUrl>
				<Point>
					<coordinates>-114.2155378991547,42.68997838159709,0</coordinates>
				</Point>
			</Placemark>
			<Placemark id="ID_00100">
				<name>170</name>
				<Snippet maxLines="0"></Snippet>
				<description><![CDATA[<html xmlns:fo="http://www.w3.org/1999/XSL/Format" xmlns:msxsl="urn:schemas-microsoft-com:xslt">

<head>

<META http-equiv="Content-Type" content="text/html">

<meta http-equiv="content-type" content="text/html; charset=UTF-8">

</head>

<body style="margin:0px 0px 0px 0px;overflow:auto;background:#FFFFFF;">

<table style="font-family:Arial,Verdana,Times;font-size:12px;text-align:left;width:100%;border-collapse:collapse;padding:3px 3px 3px 3px">

<tr style="text-align:center;font-weight:bold;background:#9CBCE2">

<td>170</td>

</tr>

<tr>

<td>

<table style="font-family:Arial,Verdana,Times;font-size:12px;text-align:left;width:100%;border-spacing:0px; padding:3px 3px 3px 3px">

<tr>

<td>FID</td>

<td>100</td>

</tr>

<tr bgcolor="#D4E4F3">

<td>F1_for_irr</td>

<td>1</td>

</tr>

<tr>

<td>Name</td>

<td>170</td>

</tr>

<tr bgcolor="#D4E4F3">

<td>Name_2</td>

<td>170</td>

</tr>

<tr>

<td>Name_1</td>

<td>170</td>

</tr>

<tr bgcolor="#D4E4F3">

<td>F1_for_i_1</td>

<td>1</td>

</tr>

<tr>

<td>notes</td>

<td></td>

</tr>

<tr bgcolor="#D4E4F3">

<td>new_number</td>

<td>1</td>

</tr>

<tr>

<td>elevation</td>

<td>1175</td>

</tr>

</table>

</td>

</tr>

</table>

</body>

</html>]]></description>
				<styleUrl>#IconStyle00</styleUrl>
				<Point>
					<coordinates>-114.4485000554332,42.68424237518553,0</coordinates>
				</Point>
			</Placemark>
			<Placemark id="ID_00101">
				<name>171</name>
				<Snippet maxLines="0"></Snippet>
				<description><![CDATA[<html xmlns:fo="http://www.w3.org/1999/XSL/Format" xmlns:msxsl="urn:schemas-microsoft-com:xslt">

<head>

<META http-equiv="Content-Type" content="text/html">

<meta http-equiv="content-type" content="text/html; charset=UTF-8">

</head>

<body style="margin:0px 0px 0px 0px;overflow:auto;background:#FFFFFF;">

<table style="font-family:Arial,Verdana,Times;font-size:12px;text-align:left;width:100%;border-collapse:collapse;padding:3px 3px 3px 3px">

<tr style="text-align:center;font-weight:bold;background:#9CBCE2">

<td>171</td>

</tr>

<tr>

<td>

<table style="font-family:Arial,Verdana,Times;font-size:12px;text-align:left;width:100%;border-spacing:0px; padding:3px 3px 3px 3px">

<tr>

<td>FID</td>

<td>101</td>

</tr>

<tr bgcolor="#D4E4F3">

<td>F1_for_irr</td>

<td>1</td>

</tr>

<tr>

<td>Name</td>

<td>171</td>

</tr>

<tr bgcolor="#D4E4F3">

<td>Name_2</td>

<td>171</td>

</tr>

<tr>

<td>Name_1</td>

<td>171</td>

</tr>

<tr bgcolor="#D4E4F3">

<td>F1_for_i_1</td>

<td>1</td>

</tr>

<tr>

<td>notes</td>

<td></td>

</tr>

<tr bgcolor="#D4E4F3">

<td>new_number</td>

<td>1</td>

</tr>

<tr>

<td>elevation</td>

<td>1095</td>

</tr>

</table>

</td>

</tr>

</table>

</body>

</html>]]></description>
				<styleUrl>#IconStyle00</styleUrl>
				<Point>
					<coordinates>-114.5724984658315,42.71359345437446,0</coordinates>
				</Point>
			</Placemark>
			<Placemark id="ID_00102">
				<name>172</name>
				<Snippet maxLines="0"></Snippet>
				<description><![CDATA[<html xmlns:fo="http://www.w3.org/1999/XSL/Format" xmlns:msxsl="urn:schemas-microsoft-com:xslt">

<head>

<META http-equiv="Content-Type" content="text/html">

<meta http-equiv="content-type" content="text/html; charset=UTF-8">

</head>

<body style="margin:0px 0px 0px 0px;overflow:auto;background:#FFFFFF;">

<table style="font-family:Arial,Verdana,Times;font-size:12px;text-align:left;width:100%;border-collapse:collapse;padding:3px 3px 3px 3px">

<tr style="text-align:center;font-weight:bold;background:#9CBCE2">

<td>172</td>

</tr>

<tr>

<td>

<table style="font-family:Arial,Verdana,Times;font-size:12px;text-align:left;width:100%;border-spacing:0px; padding:3px 3px 3px 3px">

<tr>

<td>FID</td>

<td>102</td>

</tr>

<tr bgcolor="#D4E4F3">

<td>F1_for_irr</td>

<td>1</td>

</tr>

<tr>

<td>Name</td>

<td>172</td>

</tr>

<tr bgcolor="#D4E4F3">

<td>Name_2</td>

<td>172</td>

</tr>

<tr>

<td>Name_1</td>

<td>172</td>

</tr>

<tr bgcolor="#D4E4F3">

<td>F1_for_i_1</td>

<td>1</td>

</tr>

<tr>

<td>notes</td>

<td></td>

</tr>

<tr bgcolor="#D4E4F3">

<td>new_number</td>

<td>1</td>

</tr>

<tr>

<td>elevation</td>

<td>1103</td>

</tr>

</table>

</td>

</tr>

</table>

</body>

</html>]]></description>
				<styleUrl>#IconStyle00</styleUrl>
				<Point>
					<coordinates>-114.6024348984518,42.80655100622403,0</coordinates>
				</Point>
			</Placemark>
			<Placemark id="ID_00103">
				<name>173</name>
				<Snippet maxLines="0"></Snippet>
				<description><![CDATA[<html xmlns:fo="http://www.w3.org/1999/XSL/Format" xmlns:msxsl="urn:schemas-microsoft-com:xslt">

<head>

<META http-equiv="Content-Type" content="text/html">

<meta http-equiv="content-type" content="text/html; charset=UTF-8">

</head>

<body style="margin:0px 0px 0px 0px;overflow:auto;background:#FFFFFF;">

<table style="font-family:Arial,Verdana,Times;font-size:12px;text-align:left;width:100%;border-collapse:collapse;padding:3px 3px 3px 3px">

<tr style="text-align:center;font-weight:bold;background:#9CBCE2">

<td>173</td>

</tr>

<tr>

<td>

<table style="font-family:Arial,Verdana,Times;font-size:12px;text-align:left;width:100%;border-spacing:0px; padding:3px 3px 3px 3px">

<tr>

<td>FID</td>

<td>103</td>

</tr>

<tr bgcolor="#D4E4F3">

<td>F1_for_irr</td>

<td>1</td>

</tr>

<tr>

<td>Name</td>

<td>173</td>

</tr>

<tr bgcolor="#D4E4F3">

<td>Name_2</td>

<td>173</td>

</tr>

<tr>

<td>Name_1</td>

<td>173</td>

</tr>

<tr bgcolor="#D4E4F3">

<td>F1_for_i_1</td>

<td>1</td>

</tr>

<tr>

<td>notes</td>

<td></td>

</tr>

<tr bgcolor="#D4E4F3">

<td>new_number</td>

<td>1</td>

</tr>

<tr>

<td>elevation</td>

<td>1202</td>

</tr>

</table>

</td>

</tr>

</table>

</body>

</html>]]></description>
				<styleUrl>#IconStyle00</styleUrl>
				<Point>
					<coordinates>-114.4182514834192,42.79262092861302,0</coordinates>
				</Point>
			</Placemark>
			<Placemark id="ID_00104">
				<name>174</name>
				<Snippet maxLines="0"></Snippet>
				<description><![CDATA[<html xmlns:fo="http://www.w3.org/1999/XSL/Format" xmlns:msxsl="urn:schemas-microsoft-com:xslt">

<head>

<META http-equiv="Content-Type" content="text/html">

<meta http-equiv="content-type" content="text/html; charset=UTF-8">

</head>

<body style="margin:0px 0px 0px 0px;overflow:auto;background:#FFFFFF;">

<table style="font-family:Arial,Verdana,Times;font-size:12px;text-align:left;width:100%;border-collapse:collapse;padding:3px 3px 3px 3px">

<tr style="text-align:center;font-weight:bold;background:#9CBCE2">

<td>174</td>

</tr>

<tr>

<td>

<table style="font-family:Arial,Verdana,Times;font-size:12px;text-align:left;width:100%;border-spacing:0px; padding:3px 3px 3px 3px">

<tr>

<td>FID</td>

<td>104</td>

</tr>

<tr bgcolor="#D4E4F3">

<td>F1_for_irr</td>

<td>1</td>

</tr>

<tr>

<td>Name</td>

<td>174</td>

</tr>

<tr bgcolor="#D4E4F3">

<td>Name_2</td>

<td>174</td>

</tr>

<tr>

<td>Name_1</td>

<td>174</td>

</tr>

<tr bgcolor="#D4E4F3">

<td>F1_for_i_1</td>

<td>1</td>

</tr>

<tr>

<td>notes</td>

<td></td>

</tr>

<tr bgcolor="#D4E4F3">

<td>new_number</td>

<td>1</td>

</tr>

<tr>

<td>elevation</td>

<td>1245</td>

</tr>

</table>

</td>

</tr>

</table>

</body>

</html>]]></description>
				<styleUrl>#IconStyle00</styleUrl>
				<Point>
					<coordinates>-114.3897889263179,42.72597061774985,0</coordinates>
				</Point>
			</Placemark>
			<Placemark id="ID_00105">
				<name>175</name>
				<Snippet maxLines="0"></Snippet>
				<description><![CDATA[<html xmlns:fo="http://www.w3.org/1999/XSL/Format" xmlns:msxsl="urn:schemas-microsoft-com:xslt">

<head>

<META http-equiv="Content-Type" content="text/html">

<meta http-equiv="content-type" content="text/html; charset=UTF-8">

</head>

<body style="margin:0px 0px 0px 0px;overflow:auto;background:#FFFFFF;">

<table style="font-family:Arial,Verdana,Times;font-size:12px;text-align:left;width:100%;border-collapse:collapse;padding:3px 3px 3px 3px">

<tr style="text-align:center;font-weight:bold;background:#9CBCE2">

<td>175</td>

</tr>

<tr>

<td>

<table style="font-family:Arial,Verdana,Times;font-size:12px;text-align:left;width:100%;border-spacing:0px; padding:3px 3px 3px 3px">

<tr>

<td>FID</td>

<td>105</td>

</tr>

<tr bgcolor="#D4E4F3">

<td>F1_for_irr</td>

<td>1</td>

</tr>

<tr>

<td>Name</td>

<td>175</td>

</tr>

<tr bgcolor="#D4E4F3">

<td>Name_2</td>

<td>175</td>

</tr>

<tr>

<td>Name_1</td>

<td>175</td>

</tr>

<tr bgcolor="#D4E4F3">

<td>F1_for_i_1</td>

<td>1</td>

</tr>

<tr>

<td>notes</td>

<td></td>

</tr>

<tr bgcolor="#D4E4F3">

<td>new_number</td>

<td>1</td>

</tr>

<tr>

<td>elevation</td>

<td>1114</td>

</tr>

</table>

</td>

</tr>

</table>

</body>

</html>]]></description>
				<styleUrl>#IconStyle00</styleUrl>
				<Point>
					<coordinates>-114.5431823360959,42.70578212384601,0</coordinates>
				</Point>
			</Placemark>
			<Placemark id="ID_00106">
				<name>179</name>
				<Snippet maxLines="0"></Snippet>
				<description><![CDATA[<html xmlns:fo="http://www.w3.org/1999/XSL/Format" xmlns:msxsl="urn:schemas-microsoft-com:xslt">

<head>

<META http-equiv="Content-Type" content="text/html">

<meta http-equiv="content-type" content="text/html; charset=UTF-8">

</head>

<body style="margin:0px 0px 0px 0px;overflow:auto;background:#FFFFFF;">

<table style="font-family:Arial,Verdana,Times;font-size:12px;text-align:left;width:100%;border-collapse:collapse;padding:3px 3px 3px 3px">

<tr style="text-align:center;font-weight:bold;background:#9CBCE2">

<td>179</td>

</tr>

<tr>

<td>

<table style="font-family:Arial,Verdana,Times;font-size:12px;text-align:left;width:100%;border-spacing:0px; padding:3px 3px 3px 3px">

<tr>

<td>FID</td>

<td>106</td>

</tr>

<tr bgcolor="#D4E4F3">

<td>F1_for_irr</td>

<td>0</td>

</tr>

<tr>

<td>Name</td>

<td>179</td>

</tr>

<tr bgcolor="#D4E4F3">

<td>Name_2</td>

<td>179</td>

</tr>

<tr>

<td>Name_1</td>

<td>179</td>

</tr>

<tr bgcolor="#D4E4F3">

<td>F1_for_i_1</td>

<td>0</td>

</tr>

<tr>

<td>notes</td>

<td></td>

</tr>

<tr bgcolor="#D4E4F3">

<td>new_number</td>

<td>0</td>

</tr>

<tr>

<td>elevation</td>

<td>1287</td>

</tr>

</table>

</td>

</tr>

</table>

</body>

</html>]]></description>
				<styleUrl>#IconStyle09</styleUrl>
				<Point>
					<coordinates>-114.2276428026732,42.58958981531777,0</coordinates>
				</Point>
			</Placemark>
			<Placemark id="ID_00107">
				<name>180</name>
				<Snippet maxLines="0"></Snippet>
				<description><![CDATA[<html xmlns:fo="http://www.w3.org/1999/XSL/Format" xmlns:msxsl="urn:schemas-microsoft-com:xslt">

<head>

<META http-equiv="Content-Type" content="text/html">

<meta http-equiv="content-type" content="text/html; charset=UTF-8">

</head>

<body style="margin:0px 0px 0px 0px;overflow:auto;background:#FFFFFF;">

<table style="font-family:Arial,Verdana,Times;font-size:12px;text-align:left;width:100%;border-collapse:collapse;padding:3px 3px 3px 3px">

<tr style="text-align:center;font-weight:bold;background:#9CBCE2">

<td>180</td>

</tr>

<tr>

<td>

<table style="font-family:Arial,Verdana,Times;font-size:12px;text-align:left;width:100%;border-spacing:0px; padding:3px 3px 3px 3px">

<tr>

<td>FID</td>

<td>107</td>

</tr>

<tr bgcolor="#D4E4F3">

<td>F1_for_irr</td>

<td>0</td>

</tr>

<tr>

<td>Name</td>

<td>180</td>

</tr>

<tr bgcolor="#D4E4F3">

<td>Name_2</td>

<td>180</td>

</tr>

<tr>

<td>Name_1</td>

<td>180</td>

</tr>

<tr bgcolor="#D4E4F3">

<td>F1_for_i_1</td>

<td>0</td>

</tr>

<tr>

<td>notes</td>

<td></td>

</tr>

<tr bgcolor="#D4E4F3">

<td>new_number</td>

<td>0</td>

</tr>

<tr>

<td>elevation</td>

<td>1164</td>

</tr>

</table>

</td>

</tr>

</table>

</body>

</html>]]></description>
				<styleUrl>#IconStyle09</styleUrl>
				<Point>
					<coordinates>-114.367877047188,42.65810391716212,0</coordinates>
				</Point>
			</Placemark>
			<Placemark id="ID_00108">
				<name>182</name>
				<Snippet maxLines="0"></Snippet>
				<description><![CDATA[<html xmlns:fo="http://www.w3.org/1999/XSL/Format" xmlns:msxsl="urn:schemas-microsoft-com:xslt">

<head>

<META http-equiv="Content-Type" content="text/html">

<meta http-equiv="content-type" content="text/html; charset=UTF-8">

</head>

<body style="margin:0px 0px 0px 0px;overflow:auto;background:#FFFFFF;">

<table style="font-family:Arial,Verdana,Times;font-size:12px;text-align:left;width:100%;border-collapse:collapse;padding:3px 3px 3px 3px">

<tr style="text-align:center;font-weight:bold;background:#9CBCE2">

<td>182</td>

</tr>

<tr>

<td>

<table style="font-family:Arial,Verdana,Times;font-size:12px;text-align:left;width:100%;border-spacing:0px; padding:3px 3px 3px 3px">

<tr>

<td>FID</td>

<td>108</td>

</tr>

<tr bgcolor="#D4E4F3">

<td>F1_for_irr</td>

<td>0</td>

</tr>

<tr>

<td>Name</td>

<td>182</td>

</tr>

<tr bgcolor="#D4E4F3">

<td>Name_2</td>

<td>182</td>

</tr>

<tr>

<td>Name_1</td>

<td>182</td>

</tr>

<tr bgcolor="#D4E4F3">

<td>F1_for_i_1</td>

<td>0</td>

</tr>

<tr>

<td>notes</td>

<td></td>

</tr>

<tr bgcolor="#D4E4F3">

<td>new_number</td>

<td>0</td>

</tr>

<tr>

<td>elevation</td>

<td>1109</td>

</tr>

</table>

</td>

</tr>

</table>

</body>

</html>]]></description>
				<styleUrl>#IconStyle09</styleUrl>
				<Point>
					<coordinates>-114.4858868451018,42.64697885289178,0</coordinates>
				</Point>
			</Placemark>
			<Placemark id="ID_00109">
				<name>183</name>
				<Snippet maxLines="0"></Snippet>
				<description><![CDATA[<html xmlns:fo="http://www.w3.org/1999/XSL/Format" xmlns:msxsl="urn:schemas-microsoft-com:xslt">

<head>

<META http-equiv="Content-Type" content="text/html">

<meta http-equiv="content-type" content="text/html; charset=UTF-8">

</head>

<body style="margin:0px 0px 0px 0px;overflow:auto;background:#FFFFFF;">

<table style="font-family:Arial,Verdana,Times;font-size:12px;text-align:left;width:100%;border-collapse:collapse;padding:3px 3px 3px 3px">

<tr style="text-align:center;font-weight:bold;background:#9CBCE2">

<td>183</td>

</tr>

<tr>

<td>

<table style="font-family:Arial,Verdana,Times;font-size:12px;text-align:left;width:100%;border-spacing:0px; padding:3px 3px 3px 3px">

<tr>

<td>FID</td>

<td>109</td>

</tr>

<tr bgcolor="#D4E4F3">

<td>F1_for_irr</td>

<td>0</td>

</tr>

<tr>

<td>Name</td>

<td>183</td>

</tr>

<tr bgcolor="#D4E4F3">

<td>Name_2</td>

<td>183</td>

</tr>

<tr>

<td>Name_1</td>

<td>183</td>

</tr>

<tr bgcolor="#D4E4F3">

<td>F1_for_i_1</td>

<td>0</td>

</tr>

<tr>

<td>notes</td>

<td></td>

</tr>

<tr bgcolor="#D4E4F3">

<td>new_number</td>

<td>0</td>

</tr>

<tr>

<td>elevation</td>

<td>1196</td>

</tr>

</table>

</td>

</tr>

</table>

</body>

</html>]]></description>
				<styleUrl>#IconStyle09</styleUrl>
				<Point>
					<coordinates>-114.3324062460514,42.67960576299561,0</coordinates>
				</Point>
			</Placemark>
			<Placemark id="ID_00110">
				<name>184</name>
				<Snippet maxLines="0"></Snippet>
				<description><![CDATA[<html xmlns:fo="http://www.w3.org/1999/XSL/Format" xmlns:msxsl="urn:schemas-microsoft-com:xslt">

<head>

<META http-equiv="Content-Type" content="text/html">

<meta http-equiv="content-type" content="text/html; charset=UTF-8">

</head>

<body style="margin:0px 0px 0px 0px;overflow:auto;background:#FFFFFF;">

<table style="font-family:Arial,Verdana,Times;font-size:12px;text-align:left;width:100%;border-collapse:collapse;padding:3px 3px 3px 3px">

<tr style="text-align:center;font-weight:bold;background:#9CBCE2">

<td>184</td>

</tr>

<tr>

<td>

<table style="font-family:Arial,Verdana,Times;font-size:12px;text-align:left;width:100%;border-spacing:0px; padding:3px 3px 3px 3px">

<tr>

<td>FID</td>

<td>110</td>

</tr>

<tr bgcolor="#D4E4F3">

<td>F1_for_irr</td>

<td>1</td>

</tr>

<tr>

<td>Name</td>

<td>184</td>

</tr>

<tr bgcolor="#D4E4F3">

<td>Name_2</td>

<td>184</td>

</tr>

<tr>

<td>Name_1</td>

<td>184</td>

</tr>

<tr bgcolor="#D4E4F3">

<td>F1_for_i_1</td>

<td>1</td>

</tr>

<tr>

<td>notes</td>

<td></td>

</tr>

<tr bgcolor="#D4E4F3">

<td>new_number</td>

<td>1</td>

</tr>

<tr>

<td>elevation</td>

<td>1336</td>

</tr>

</table>

</td>

</tr>

</table>

</body>

</html>]]></description>
				<styleUrl>#IconStyle00</styleUrl>
				<Point>
					<coordinates>-114.1145770250097,43.0837979384242,0</coordinates>
				</Point>
			</Placemark>
			<Placemark id="ID_00111">
				<name>185</name>
				<Snippet maxLines="0"></Snippet>
				<description><![CDATA[<html xmlns:fo="http://www.w3.org/1999/XSL/Format" xmlns:msxsl="urn:schemas-microsoft-com:xslt">

<head>

<META http-equiv="Content-Type" content="text/html">

<meta http-equiv="content-type" content="text/html; charset=UTF-8">

</head>

<body style="margin:0px 0px 0px 0px;overflow:auto;background:#FFFFFF;">

<table style="font-family:Arial,Verdana,Times;font-size:12px;text-align:left;width:100%;border-collapse:collapse;padding:3px 3px 3px 3px">

<tr style="text-align:center;font-weight:bold;background:#9CBCE2">

<td>185</td>

</tr>

<tr>

<td>

<table style="font-family:Arial,Verdana,Times;font-size:12px;text-align:left;width:100%;border-spacing:0px; padding:3px 3px 3px 3px">

<tr>

<td>FID</td>

<td>111</td>

</tr>

<tr bgcolor="#D4E4F3">

<td>F1_for_irr</td>

<td>1</td>

</tr>

<tr>

<td>Name</td>

<td>185</td>

</tr>

<tr bgcolor="#D4E4F3">

<td>Name_2</td>

<td>185</td>

</tr>

<tr>

<td>Name_1</td>

<td>185</td>

</tr>

<tr bgcolor="#D4E4F3">

<td>F1_for_i_1</td>

<td>1</td>

</tr>

<tr>

<td>notes</td>

<td></td>

</tr>

<tr bgcolor="#D4E4F3">

<td>new_number</td>

<td>1</td>

</tr>

<tr>

<td>elevation</td>

<td>1296</td>

</tr>

</table>

</td>

</tr>

</table>

</body>

</html>]]></description>
				<styleUrl>#IconStyle00</styleUrl>
				<Point>
					<coordinates>-114.2101636756131,43.02935321198117,0</coordinates>
				</Point>
			</Placemark>
			<Placemark id="ID_00112">
				<name>186</name>
				<Snippet maxLines="0"></Snippet>
				<description><![CDATA[<html xmlns:fo="http://www.w3.org/1999/XSL/Format" xmlns:msxsl="urn:schemas-microsoft-com:xslt">

<head>

<META http-equiv="Content-Type" content="text/html">

<meta http-equiv="content-type" content="text/html; charset=UTF-8">

</head>

<body style="margin:0px 0px 0px 0px;overflow:auto;background:#FFFFFF;">

<table style="font-family:Arial,Verdana,Times;font-size:12px;text-align:left;width:100%;border-collapse:collapse;padding:3px 3px 3px 3px">

<tr style="text-align:center;font-weight:bold;background:#9CBCE2">

<td>186</td>

</tr>

<tr>

<td>

<table style="font-family:Arial,Verdana,Times;font-size:12px;text-align:left;width:100%;border-spacing:0px; padding:3px 3px 3px 3px">

<tr>

<td>FID</td>

<td>112</td>

</tr>

<tr bgcolor="#D4E4F3">

<td>F1_for_irr</td>

<td>1</td>

</tr>

<tr>

<td>Name</td>

<td>186</td>

</tr>

<tr bgcolor="#D4E4F3">

<td>Name_2</td>

<td>186</td>

</tr>

<tr>

<td>Name_1</td>

<td>186</td>

</tr>

<tr bgcolor="#D4E4F3">

<td>F1_for_i_1</td>

<td>1</td>

</tr>

<tr>

<td>notes</td>

<td></td>

</tr>

<tr bgcolor="#D4E4F3">

<td>new_number</td>

<td>1</td>

</tr>

<tr>

<td>elevation</td>

<td>1223</td>

</tr>

</table>

</td>

</tr>

</table>

</body>

</html>]]></description>
				<styleUrl>#IconStyle00</styleUrl>
				<Point>
					<coordinates>-114.4203641779644,42.99998082065838,0</coordinates>
				</Point>
			</Placemark>
			<Placemark id="ID_00113">
				<name>187</name>
				<Snippet maxLines="0"></Snippet>
				<description><![CDATA[<html xmlns:fo="http://www.w3.org/1999/XSL/Format" xmlns:msxsl="urn:schemas-microsoft-com:xslt">

<head>

<META http-equiv="Content-Type" content="text/html">

<meta http-equiv="content-type" content="text/html; charset=UTF-8">

</head>

<body style="margin:0px 0px 0px 0px;overflow:auto;background:#FFFFFF;">

<table style="font-family:Arial,Verdana,Times;font-size:12px;text-align:left;width:100%;border-collapse:collapse;padding:3px 3px 3px 3px">

<tr style="text-align:center;font-weight:bold;background:#9CBCE2">

<td>187</td>

</tr>

<tr>

<td>

<table style="font-family:Arial,Verdana,Times;font-size:12px;text-align:left;width:100%;border-spacing:0px; padding:3px 3px 3px 3px">

<tr>

<td>FID</td>

<td>113</td>

</tr>

<tr bgcolor="#D4E4F3">

<td>F1_for_irr</td>

<td>1</td>

</tr>

<tr>

<td>Name</td>

<td>187</td>

</tr>

<tr bgcolor="#D4E4F3">

<td>Name_2</td>

<td>187</td>

</tr>

<tr>

<td>Name_1</td>

<td>187</td>

</tr>

<tr bgcolor="#D4E4F3">

<td>F1_for_i_1</td>

<td>1</td>

</tr>

<tr>

<td>notes</td>

<td></td>

</tr>

<tr bgcolor="#D4E4F3">

<td>new_number</td>

<td>1</td>

</tr>

<tr>

<td>elevation</td>

<td>1216</td>

</tr>

</table>

</td>

</tr>

</table>

</body>

</html>]]></description>
				<styleUrl>#IconStyle00</styleUrl>
				<Point>
					<coordinates>-114.3905543483045,42.9451788169489,0</coordinates>
				</Point>
			</Placemark>
			<Placemark id="ID_00114">
				<name>188</name>
				<Snippet maxLines="0"></Snippet>
				<description><![CDATA[<html xmlns:fo="http://www.w3.org/1999/XSL/Format" xmlns:msxsl="urn:schemas-microsoft-com:xslt">

<head>

<META http-equiv="Content-Type" content="text/html">

<meta http-equiv="content-type" content="text/html; charset=UTF-8">

</head>

<body style="margin:0px 0px 0px 0px;overflow:auto;background:#FFFFFF;">

<table style="font-family:Arial,Verdana,Times;font-size:12px;text-align:left;width:100%;border-collapse:collapse;padding:3px 3px 3px 3px">

<tr style="text-align:center;font-weight:bold;background:#9CBCE2">

<td>188</td>

</tr>

<tr>

<td>

<table style="font-family:Arial,Verdana,Times;font-size:12px;text-align:left;width:100%;border-spacing:0px; padding:3px 3px 3px 3px">

<tr>

<td>FID</td>

<td>114</td>

</tr>

<tr bgcolor="#D4E4F3">

<td>F1_for_irr</td>

<td>1</td>

</tr>

<tr>

<td>Name</td>

<td>188</td>

</tr>

<tr bgcolor="#D4E4F3">

<td>Name_2</td>

<td>188</td>

</tr>

<tr>

<td>Name_1</td>

<td>188</td>

</tr>

<tr bgcolor="#D4E4F3">

<td>F1_for_i_1</td>

<td>1</td>

</tr>

<tr>

<td>notes</td>

<td></td>

</tr>

<tr bgcolor="#D4E4F3">

<td>new_number</td>

<td>1</td>

</tr>

<tr>

<td>elevation</td>

<td>1214</td>

</tr>

</table>

</td>

</tr>

</table>

</body>

</html>]]></description>
				<styleUrl>#IconStyle00</styleUrl>
				<Point>
					<coordinates>-114.4832274140139,42.85462490111837,0</coordinates>
				</Point>
			</Placemark>
			<Placemark id="ID_00115">
				<name>189</name>
				<Snippet maxLines="0"></Snippet>
				<description><![CDATA[<html xmlns:fo="http://www.w3.org/1999/XSL/Format" xmlns:msxsl="urn:schemas-microsoft-com:xslt">

<head>

<META http-equiv="Content-Type" content="text/html">

<meta http-equiv="content-type" content="text/html; charset=UTF-8">

</head>

<body style="margin:0px 0px 0px 0px;overflow:auto;background:#FFFFFF;">

<table style="font-family:Arial,Verdana,Times;font-size:12px;text-align:left;width:100%;border-collapse:collapse;padding:3px 3px 3px 3px">

<tr style="text-align:center;font-weight:bold;background:#9CBCE2">

<td>189</td>

</tr>

<tr>

<td>

<table style="font-family:Arial,Verdana,Times;font-size:12px;text-align:left;width:100%;border-spacing:0px; padding:3px 3px 3px 3px">

<tr>

<td>FID</td>

<td>115</td>

</tr>

<tr bgcolor="#D4E4F3">

<td>F1_for_irr</td>

<td>1</td>

</tr>

<tr>

<td>Name</td>

<td>189</td>

</tr>

<tr bgcolor="#D4E4F3">

<td>Name_2</td>

<td>189</td>

</tr>

<tr>

<td>Name_1</td>

<td>189</td>

</tr>

<tr bgcolor="#D4E4F3">

<td>F1_for_i_1</td>

<td>1</td>

</tr>

<tr>

<td>notes</td>

<td></td>

</tr>

<tr bgcolor="#D4E4F3">

<td>new_number</td>

<td>1</td>

</tr>

<tr>

<td>elevation</td>

<td>1204</td>

</tr>

</table>

</td>

</tr>

</table>

</body>

</html>]]></description>
				<styleUrl>#IconStyle00</styleUrl>
				<Point>
					<coordinates>-114.3114864594325,42.84232615592742,0</coordinates>
				</Point>
			</Placemark>
			<Placemark id="ID_00116">
				<name>190</name>
				<Snippet maxLines="0"></Snippet>
				<description><![CDATA[<html xmlns:fo="http://www.w3.org/1999/XSL/Format" xmlns:msxsl="urn:schemas-microsoft-com:xslt">

<head>

<META http-equiv="Content-Type" content="text/html">

<meta http-equiv="content-type" content="text/html; charset=UTF-8">

</head>

<body style="margin:0px 0px 0px 0px;overflow:auto;background:#FFFFFF;">

<table style="font-family:Arial,Verdana,Times;font-size:12px;text-align:left;width:100%;border-collapse:collapse;padding:3px 3px 3px 3px">

<tr style="text-align:center;font-weight:bold;background:#9CBCE2">

<td>190</td>

</tr>

<tr>

<td>

<table style="font-family:Arial,Verdana,Times;font-size:12px;text-align:left;width:100%;border-spacing:0px; padding:3px 3px 3px 3px">

<tr>

<td>FID</td>

<td>116</td>

</tr>

<tr bgcolor="#D4E4F3">

<td>F1_for_irr</td>

<td>1</td>

</tr>

<tr>

<td>Name</td>

<td>190</td>

</tr>

<tr bgcolor="#D4E4F3">

<td>Name_2</td>

<td>190</td>

</tr>

<tr>

<td>Name_1</td>

<td>190</td>

</tr>

<tr bgcolor="#D4E4F3">

<td>F1_for_i_1</td>

<td>1</td>

</tr>

<tr>

<td>notes</td>

<td></td>

</tr>

<tr bgcolor="#D4E4F3">

<td>new_number</td>

<td>1</td>

</tr>

<tr>

<td>elevation</td>

<td>1223</td>

</tr>

</table>

</td>

</tr>

</table>

</body>

</html>]]></description>
				<styleUrl>#IconStyle00</styleUrl>
				<Point>
					<coordinates>-114.2608458382648,42.86875993512297,0</coordinates>
				</Point>
			</Placemark>
			<Placemark id="ID_00117">
				<name>191</name>
				<Snippet maxLines="0"></Snippet>
				<description><![CDATA[<html xmlns:fo="http://www.w3.org/1999/XSL/Format" xmlns:msxsl="urn:schemas-microsoft-com:xslt">

<head>

<META http-equiv="Content-Type" content="text/html">

<meta http-equiv="content-type" content="text/html; charset=UTF-8">

</head>

<body style="margin:0px 0px 0px 0px;overflow:auto;background:#FFFFFF;">

<table style="font-family:Arial,Verdana,Times;font-size:12px;text-align:left;width:100%;border-collapse:collapse;padding:3px 3px 3px 3px">

<tr style="text-align:center;font-weight:bold;background:#9CBCE2">

<td>191</td>

</tr>

<tr>

<td>

<table style="font-family:Arial,Verdana,Times;font-size:12px;text-align:left;width:100%;border-spacing:0px; padding:3px 3px 3px 3px">

<tr>

<td>FID</td>

<td>117</td>

</tr>

<tr bgcolor="#D4E4F3">

<td>F1_for_irr</td>

<td>1</td>

</tr>

<tr>

<td>Name</td>

<td>191</td>

</tr>

<tr bgcolor="#D4E4F3">

<td>Name_2</td>

<td>191</td>

</tr>

<tr>

<td>Name_1</td>

<td>191</td>

</tr>

<tr bgcolor="#D4E4F3">

<td>F1_for_i_1</td>

<td>1</td>

</tr>

<tr>

<td>notes</td>

<td></td>

</tr>

<tr bgcolor="#D4E4F3">

<td>new_number</td>

<td>1</td>

</tr>

<tr>

<td>elevation</td>

<td>1233</td>

</tr>

</table>

</td>

</tr>

</table>

</body>

</html>]]></description>
				<styleUrl>#IconStyle00</styleUrl>
				<Point>
					<coordinates>-114.2014520175965,42.84731448397633,0</coordinates>
				</Point>
			</Placemark>
			<Placemark id="ID_00118">
				<name>192</name>
				<Snippet maxLines="0"></Snippet>
				<description><![CDATA[<html xmlns:fo="http://www.w3.org/1999/XSL/Format" xmlns:msxsl="urn:schemas-microsoft-com:xslt">

<head>

<META http-equiv="Content-Type" content="text/html">

<meta http-equiv="content-type" content="text/html; charset=UTF-8">

</head>

<body style="margin:0px 0px 0px 0px;overflow:auto;background:#FFFFFF;">

<table style="font-family:Arial,Verdana,Times;font-size:12px;text-align:left;width:100%;border-collapse:collapse;padding:3px 3px 3px 3px">

<tr style="text-align:center;font-weight:bold;background:#9CBCE2">

<td>192</td>

</tr>

<tr>

<td>

<table style="font-family:Arial,Verdana,Times;font-size:12px;text-align:left;width:100%;border-spacing:0px; padding:3px 3px 3px 3px">

<tr>

<td>FID</td>

<td>118</td>

</tr>

<tr bgcolor="#D4E4F3">

<td>F1_for_irr</td>

<td>1</td>

</tr>

<tr>

<td>Name</td>

<td>192</td>

</tr>

<tr bgcolor="#D4E4F3">

<td>Name_2</td>

<td>192</td>

</tr>

<tr>

<td>Name_1</td>

<td>192</td>

</tr>

<tr bgcolor="#D4E4F3">

<td>F1_for_i_1</td>

<td>1</td>

</tr>

<tr>

<td>notes</td>

<td></td>

</tr>

<tr bgcolor="#D4E4F3">

<td>new_number</td>

<td>1</td>

</tr>

<tr>

<td>elevation</td>

<td>1243</td>

</tr>

</table>

</td>

</tr>

</table>

</body>

</html>]]></description>
				<styleUrl>#IconStyle00</styleUrl>
				<Point>
					<coordinates>-114.2184308589969,42.89022975160179,0</coordinates>
				</Point>
			</Placemark>
			<Placemark id="ID_00119">
				<name>193</name>
				<Snippet maxLines="0"></Snippet>
				<description><![CDATA[<html xmlns:fo="http://www.w3.org/1999/XSL/Format" xmlns:msxsl="urn:schemas-microsoft-com:xslt">

<head>

<META http-equiv="Content-Type" content="text/html">

<meta http-equiv="content-type" content="text/html; charset=UTF-8">

</head>

<body style="margin:0px 0px 0px 0px;overflow:auto;background:#FFFFFF;">

<table style="font-family:Arial,Verdana,Times;font-size:12px;text-align:left;width:100%;border-collapse:collapse;padding:3px 3px 3px 3px">

<tr style="text-align:center;font-weight:bold;background:#9CBCE2">

<td>193</td>

</tr>

<tr>

<td>

<table style="font-family:Arial,Verdana,Times;font-size:12px;text-align:left;width:100%;border-spacing:0px; padding:3px 3px 3px 3px">

<tr>

<td>FID</td>

<td>119</td>

</tr>

<tr bgcolor="#D4E4F3">

<td>F1_for_irr</td>

<td>1</td>

</tr>

<tr>

<td>Name</td>

<td>193</td>

</tr>

<tr bgcolor="#D4E4F3">

<td>Name_2</td>

<td>193</td>

</tr>

<tr>

<td>Name_1</td>

<td>193</td>

</tr>

<tr bgcolor="#D4E4F3">

<td>F1_for_i_1</td>

<td>1</td>

</tr>

<tr>

<td>notes</td>

<td></td>

</tr>

<tr bgcolor="#D4E4F3">

<td>new_number</td>

<td>1</td>

</tr>

<tr>

<td>elevation</td>

<td>1289</td>

</tr>

</table>

</td>

</tr>

</table>

</body>

</html>]]></description>
				<styleUrl>#IconStyle00</styleUrl>
				<Point>
					<coordinates>-114.0239012942093,42.8552235267444,0</coordinates>
				</Point>
			</Placemark>
			<Placemark id="ID_00120">
				<name>194</name>
				<Snippet maxLines="0"></Snippet>
				<description><![CDATA[<html xmlns:fo="http://www.w3.org/1999/XSL/Format" xmlns:msxsl="urn:schemas-microsoft-com:xslt">

<head>

<META http-equiv="Content-Type" content="text/html">

<meta http-equiv="content-type" content="text/html; charset=UTF-8">

</head>

<body style="margin:0px 0px 0px 0px;overflow:auto;background:#FFFFFF;">

<table style="font-family:Arial,Verdana,Times;font-size:12px;text-align:left;width:100%;border-collapse:collapse;padding:3px 3px 3px 3px">

<tr style="text-align:center;font-weight:bold;background:#9CBCE2">

<td>194</td>

</tr>

<tr>

<td>

<table style="font-family:Arial,Verdana,Times;font-size:12px;text-align:left;width:100%;border-spacing:0px; padding:3px 3px 3px 3px">

<tr>

<td>FID</td>

<td>120</td>

</tr>

<tr bgcolor="#D4E4F3">

<td>F1_for_irr</td>

<td>0</td>

</tr>

<tr>

<td>Name</td>

<td>194</td>

</tr>

<tr bgcolor="#D4E4F3">

<td>Name_2</td>

<td>194</td>

</tr>

<tr>

<td>Name_1</td>

<td>194</td>

</tr>

<tr bgcolor="#D4E4F3">

<td>F1_for_i_1</td>

<td>0</td>

</tr>

<tr>

<td>notes</td>

<td></td>

</tr>

<tr bgcolor="#D4E4F3">

<td>new_number</td>

<td>2</td>

</tr>

<tr>

<td>elevation</td>

<td>1396</td>

</tr>

</table>

</td>

</tr>

</table>

</body>

</html>]]></description>
				<styleUrl>#IconStyle09</styleUrl>
				<Point>
					<coordinates>-114.1821244338955,43.15106895866558,0</coordinates>
				</Point>
			</Placemark>
			<Placemark id="ID_00121">
				<name>195</name>
				<Snippet maxLines="0"></Snippet>
				<description><![CDATA[<html xmlns:fo="http://www.w3.org/1999/XSL/Format" xmlns:msxsl="urn:schemas-microsoft-com:xslt">

<head>

<META http-equiv="Content-Type" content="text/html">

<meta http-equiv="content-type" content="text/html; charset=UTF-8">

</head>

<body style="margin:0px 0px 0px 0px;overflow:auto;background:#FFFFFF;">

<table style="font-family:Arial,Verdana,Times;font-size:12px;text-align:left;width:100%;border-collapse:collapse;padding:3px 3px 3px 3px">

<tr style="text-align:center;font-weight:bold;background:#9CBCE2">

<td>195</td>

</tr>

<tr>

<td>

<table style="font-family:Arial,Verdana,Times;font-size:12px;text-align:left;width:100%;border-spacing:0px; padding:3px 3px 3px 3px">

<tr>

<td>FID</td>

<td>121</td>

</tr>

<tr bgcolor="#D4E4F3">

<td>F1_for_irr</td>

<td>0</td>

</tr>

<tr>

<td>Name</td>

<td>195</td>

</tr>

<tr bgcolor="#D4E4F3">

<td>Name_2</td>

<td>195</td>

</tr>

<tr>

<td>Name_1</td>

<td>195</td>

</tr>

<tr bgcolor="#D4E4F3">

<td>F1_for_i_1</td>

<td>0</td>

</tr>

<tr>

<td>notes</td>

<td></td>

</tr>

<tr bgcolor="#D4E4F3">

<td>new_number</td>

<td>2</td>

</tr>

<tr>

<td>elevation</td>

<td>1418</td>

</tr>

</table>

</td>

</tr>

</table>

</body>

</html>]]></description>
				<styleUrl>#IconStyle09</styleUrl>
				<Point>
					<coordinates>-114.0128645982226,43.19807657327527,0</coordinates>
				</Point>
			</Placemark>
			<Placemark id="ID_00122">
				<name>196</name>
				<Snippet maxLines="0"></Snippet>
				<description><![CDATA[<html xmlns:fo="http://www.w3.org/1999/XSL/Format" xmlns:msxsl="urn:schemas-microsoft-com:xslt">

<head>

<META http-equiv="Content-Type" content="text/html">

<meta http-equiv="content-type" content="text/html; charset=UTF-8">

</head>

<body style="margin:0px 0px 0px 0px;overflow:auto;background:#FFFFFF;">

<table style="font-family:Arial,Verdana,Times;font-size:12px;text-align:left;width:100%;border-collapse:collapse;padding:3px 3px 3px 3px">

<tr style="text-align:center;font-weight:bold;background:#9CBCE2">

<td>196</td>

</tr>

<tr>

<td>

<table style="font-family:Arial,Verdana,Times;font-size:12px;text-align:left;width:100%;border-spacing:0px; padding:3px 3px 3px 3px">

<tr>

<td>FID</td>

<td>122</td>

</tr>

<tr bgcolor="#D4E4F3">

<td>F1_for_irr</td>

<td>0</td>

</tr>

<tr>

<td>Name</td>

<td>196</td>

</tr>

<tr bgcolor="#D4E4F3">

<td>Name_2</td>

<td>196</td>

</tr>

<tr>

<td>Name_1</td>

<td>196</td>

</tr>

<tr bgcolor="#D4E4F3">

<td>F1_for_i_1</td>

<td>0</td>

</tr>

<tr>

<td>notes</td>

<td></td>

</tr>

<tr bgcolor="#D4E4F3">

<td>new_number</td>

<td>2</td>

</tr>

<tr>

<td>elevation</td>

<td>1290</td>

</tr>

</table>

</td>

</tr>

</table>

</body>

</html>]]></description>
				<styleUrl>#IconStyle09</styleUrl>
				<Point>
					<coordinates>-114.3280797254989,43.04283006995183,0</coordinates>
				</Point>
			</Placemark>
			<Placemark id="ID_00123">
				<name>197</name>
				<Snippet maxLines="0"></Snippet>
				<description><![CDATA[<html xmlns:fo="http://www.w3.org/1999/XSL/Format" xmlns:msxsl="urn:schemas-microsoft-com:xslt">

<head>

<META http-equiv="Content-Type" content="text/html">

<meta http-equiv="content-type" content="text/html; charset=UTF-8">

</head>

<body style="margin:0px 0px 0px 0px;overflow:auto;background:#FFFFFF;">

<table style="font-family:Arial,Verdana,Times;font-size:12px;text-align:left;width:100%;border-collapse:collapse;padding:3px 3px 3px 3px">

<tr style="text-align:center;font-weight:bold;background:#9CBCE2">

<td>197</td>

</tr>

<tr>

<td>

<table style="font-family:Arial,Verdana,Times;font-size:12px;text-align:left;width:100%;border-spacing:0px; padding:3px 3px 3px 3px">

<tr>

<td>FID</td>

<td>123</td>

</tr>

<tr bgcolor="#D4E4F3">

<td>F1_for_irr</td>

<td>0</td>

</tr>

<tr>

<td>Name</td>

<td>197</td>

</tr>

<tr bgcolor="#D4E4F3">

<td>Name_2</td>

<td>197</td>

</tr>

<tr>

<td>Name_1</td>

<td>197</td>

</tr>

<tr bgcolor="#D4E4F3">

<td>F1_for_i_1</td>

<td>0</td>

</tr>

<tr>

<td>notes</td>

<td></td>

</tr>

<tr bgcolor="#D4E4F3">

<td>new_number</td>

<td>0</td>

</tr>

<tr>

<td>elevation</td>

<td>1381</td>

</tr>

</table>

</td>

</tr>

</table>

</body>

</html>]]></description>
				<styleUrl>#IconStyle09</styleUrl>
				<Point>
					<coordinates>-114.1499792240619,43.09468049600815,0</coordinates>
				</Point>
			</Placemark>
			<Placemark id="ID_00124">
				<name>198</name>
				<Snippet maxLines="0"></Snippet>
				<description><![CDATA[<html xmlns:fo="http://www.w3.org/1999/XSL/Format" xmlns:msxsl="urn:schemas-microsoft-com:xslt">

<head>

<META http-equiv="Content-Type" content="text/html">

<meta http-equiv="content-type" content="text/html; charset=UTF-8">

</head>

<body style="margin:0px 0px 0px 0px;overflow:auto;background:#FFFFFF;">

<table style="font-family:Arial,Verdana,Times;font-size:12px;text-align:left;width:100%;border-collapse:collapse;padding:3px 3px 3px 3px">

<tr style="text-align:center;font-weight:bold;background:#9CBCE2">

<td>198</td>

</tr>

<tr>

<td>

<table style="font-family:Arial,Verdana,Times;font-size:12px;text-align:left;width:100%;border-spacing:0px; padding:3px 3px 3px 3px">

<tr>

<td>FID</td>

<td>124</td>

</tr>

<tr bgcolor="#D4E4F3">

<td>F1_for_irr</td>

<td>0</td>

</tr>

<tr>

<td>Name</td>

<td>198</td>

</tr>

<tr bgcolor="#D4E4F3">

<td>Name_2</td>

<td>198</td>

</tr>

<tr>

<td>Name_1</td>

<td>198</td>

</tr>

<tr bgcolor="#D4E4F3">

<td>F1_for_i_1</td>

<td>0</td>

</tr>

<tr>

<td>notes</td>

<td>pasture</td>

</tr>

<tr bgcolor="#D4E4F3">

<td>new_number</td>

<td>2</td>

</tr>

<tr>

<td>elevation</td>

<td>1321</td>

</tr>

</table>

</td>

</tr>

</table>

</body>

</html>]]></description>
				<styleUrl>#IconStyle09</styleUrl>
				<Point>
					<coordinates>-114.1539778185215,43.06061812762454,0</coordinates>
				</Point>
			</Placemark>
			<Placemark id="ID_00125">
				<name>200</name>
				<Snippet maxLines="0"></Snippet>
				<description><![CDATA[<html xmlns:fo="http://www.w3.org/1999/XSL/Format" xmlns:msxsl="urn:schemas-microsoft-com:xslt">

<head>

<META http-equiv="Content-Type" content="text/html">

<meta http-equiv="content-type" content="text/html; charset=UTF-8">

</head>

<body style="margin:0px 0px 0px 0px;overflow:auto;background:#FFFFFF;">

<table style="font-family:Arial,Verdana,Times;font-size:12px;text-align:left;width:100%;border-collapse:collapse;padding:3px 3px 3px 3px">

<tr style="text-align:center;font-weight:bold;background:#9CBCE2">

<td>200</td>

</tr>

<tr>

<td>

<table style="font-family:Arial,Verdana,Times;font-size:12px;text-align:left;width:100%;border-spacing:0px; padding:3px 3px 3px 3px">

<tr>

<td>FID</td>

<td>125</td>

</tr>

<tr bgcolor="#D4E4F3">

<td>F1_for_irr</td>

<td>0</td>

</tr>

<tr>

<td>Name</td>

<td>200</td>

</tr>

<tr bgcolor="#D4E4F3">

<td>Name_2</td>

<td>200</td>

</tr>

<tr>

<td>Name_1</td>

<td>200</td>

</tr>

<tr bgcolor="#D4E4F3">

<td>F1_for_i_1</td>

<td>0</td>

</tr>

<tr>

<td>notes</td>

<td>pasture</td>

</tr>

<tr bgcolor="#D4E4F3">

<td>new_number</td>

<td>2</td>

</tr>

<tr>

<td>elevation</td>

<td>1281</td>

</tr>

</table>

</td>

</tr>

</table>

</body>

</html>]]></description>
				<styleUrl>#IconStyle09</styleUrl>
				<Point>
					<coordinates>-114.227095709999,43.01939205120226,0</coordinates>
				</Point>
			</Placemark>
			<Placemark id="ID_00126">
				<name>201</name>
				<Snippet maxLines="0"></Snippet>
				<description><![CDATA[<html xmlns:fo="http://www.w3.org/1999/XSL/Format" xmlns:msxsl="urn:schemas-microsoft-com:xslt">

<head>

<META http-equiv="Content-Type" content="text/html">

<meta http-equiv="content-type" content="text/html; charset=UTF-8">

</head>

<body style="margin:0px 0px 0px 0px;overflow:auto;background:#FFFFFF;">

<table style="font-family:Arial,Verdana,Times;font-size:12px;text-align:left;width:100%;border-collapse:collapse;padding:3px 3px 3px 3px">

<tr style="text-align:center;font-weight:bold;background:#9CBCE2">

<td>201</td>

</tr>

<tr>

<td>

<table style="font-family:Arial,Verdana,Times;font-size:12px;text-align:left;width:100%;border-spacing:0px; padding:3px 3px 3px 3px">

<tr>

<td>FID</td>

<td>126</td>

</tr>

<tr bgcolor="#D4E4F3">

<td>F1_for_irr</td>

<td>0</td>

</tr>

<tr>

<td>Name</td>

<td>201</td>

</tr>

<tr bgcolor="#D4E4F3">

<td>Name_2</td>

<td>201</td>

</tr>

<tr>

<td>Name_1</td>

<td>201</td>

</tr>

<tr bgcolor="#D4E4F3">

<td>F1_for_i_1</td>

<td>0</td>

</tr>

<tr>

<td>notes</td>

<td></td>

</tr>

<tr bgcolor="#D4E4F3">

<td>new_number</td>

<td>2</td>

</tr>

<tr>

<td>elevation</td>

<td>1224</td>

</tr>

</table>

</td>

</tr>

</table>

</body>

</html>]]></description>
				<styleUrl>#IconStyle09</styleUrl>
				<Point>
					<coordinates>-114.470800126025,43.04830841520123,0</coordinates>
				</Point>
			</Placemark>
			<Placemark id="ID_00127">
				<name>203</name>
				<Snippet maxLines="0"></Snippet>
				<description><![CDATA[<html xmlns:fo="http://www.w3.org/1999/XSL/Format" xmlns:msxsl="urn:schemas-microsoft-com:xslt">

<head>

<META http-equiv="Content-Type" content="text/html">

<meta http-equiv="content-type" content="text/html; charset=UTF-8">

</head>

<body style="margin:0px 0px 0px 0px;overflow:auto;background:#FFFFFF;">

<table style="font-family:Arial,Verdana,Times;font-size:12px;text-align:left;width:100%;border-collapse:collapse;padding:3px 3px 3px 3px">

<tr style="text-align:center;font-weight:bold;background:#9CBCE2">

<td>203</td>

</tr>

<tr>

<td>

<table style="font-family:Arial,Verdana,Times;font-size:12px;text-align:left;width:100%;border-spacing:0px; padding:3px 3px 3px 3px">

<tr>

<td>FID</td>

<td>127</td>

</tr>

<tr bgcolor="#D4E4F3">

<td>F1_for_irr</td>

<td>1</td>

</tr>

<tr>

<td>Name</td>

<td>203</td>

</tr>

<tr bgcolor="#D4E4F3">

<td>Name_2</td>

<td>203</td>

</tr>

<tr>

<td>Name_1</td>

<td>203</td>

</tr>

<tr bgcolor="#D4E4F3">

<td>F1_for_i_1</td>

<td>1</td>

</tr>

<tr>

<td>notes</td>

<td></td>

</tr>

<tr bgcolor="#D4E4F3">

<td>new_number</td>

<td>1</td>

</tr>

<tr>

<td>elevation</td>

<td>690</td>

</tr>

</table>

</td>

</tr>

</table>

</body>

</html>]]></description>
				<styleUrl>#IconStyle00</styleUrl>
				<Point>
					<coordinates>-116.8668296422741,43.58473888818918,0</coordinates>
				</Point>
			</Placemark>
			<Placemark id="ID_00128">
				<name>204</name>
				<Snippet maxLines="0"></Snippet>
				<description><![CDATA[<html xmlns:fo="http://www.w3.org/1999/XSL/Format" xmlns:msxsl="urn:schemas-microsoft-com:xslt">

<head>

<META http-equiv="Content-Type" content="text/html">

<meta http-equiv="content-type" content="text/html; charset=UTF-8">

</head>

<body style="margin:0px 0px 0px 0px;overflow:auto;background:#FFFFFF;">

<table style="font-family:Arial,Verdana,Times;font-size:12px;text-align:left;width:100%;border-collapse:collapse;padding:3px 3px 3px 3px">

<tr style="text-align:center;font-weight:bold;background:#9CBCE2">

<td>204</td>

</tr>

<tr>

<td>

<table style="font-family:Arial,Verdana,Times;font-size:12px;text-align:left;width:100%;border-spacing:0px; padding:3px 3px 3px 3px">

<tr>

<td>FID</td>

<td>128</td>

</tr>

<tr bgcolor="#D4E4F3">

<td>F1_for_irr</td>

<td>1</td>

</tr>

<tr>

<td>Name</td>

<td>204</td>

</tr>

<tr bgcolor="#D4E4F3">

<td>Name_2</td>

<td>204</td>

</tr>

<tr>

<td>Name_1</td>

<td>204</td>

</tr>

<tr bgcolor="#D4E4F3">

<td>F1_for_i_1</td>

<td>1</td>

</tr>

<tr>

<td>notes</td>

<td></td>

</tr>

<tr bgcolor="#D4E4F3">

<td>new_number</td>

<td>1</td>

</tr>

<tr>

<td>elevation</td>

<td>726</td>

</tr>

</table>

</td>

</tr>

</table>

</body>

</html>]]></description>
				<styleUrl>#IconStyle00</styleUrl>
				<Point>
					<coordinates>-116.9768538822009,43.57223527114093,0</coordinates>
				</Point>
			</Placemark>
			<Placemark id="ID_00129">
				<name>205</name>
				<Snippet maxLines="0"></Snippet>
				<description><![CDATA[<html xmlns:fo="http://www.w3.org/1999/XSL/Format" xmlns:msxsl="urn:schemas-microsoft-com:xslt">

<head>

<META http-equiv="Content-Type" content="text/html">

<meta http-equiv="content-type" content="text/html; charset=UTF-8">

</head>

<body style="margin:0px 0px 0px 0px;overflow:auto;background:#FFFFFF;">

<table style="font-family:Arial,Verdana,Times;font-size:12px;text-align:left;width:100%;border-collapse:collapse;padding:3px 3px 3px 3px">

<tr style="text-align:center;font-weight:bold;background:#9CBCE2">

<td>205</td>

</tr>

<tr>

<td>

<table style="font-family:Arial,Verdana,Times;font-size:12px;text-align:left;width:100%;border-spacing:0px; padding:3px 3px 3px 3px">

<tr>

<td>FID</td>

<td>129</td>

</tr>

<tr bgcolor="#D4E4F3">

<td>F1_for_irr</td>

<td>1</td>

</tr>

<tr>

<td>Name</td>

<td>205</td>

</tr>

<tr bgcolor="#D4E4F3">

<td>Name_2</td>

<td>205</td>

</tr>

<tr>

<td>Name_1</td>

<td>205</td>

</tr>

<tr bgcolor="#D4E4F3">

<td>F1_for_i_1</td>

<td>1</td>

</tr>

<tr>

<td>notes</td>

<td></td>

</tr>

<tr bgcolor="#D4E4F3">

<td>new_number</td>

<td>1</td>

</tr>

<tr>

<td>elevation</td>

<td>745</td>

</tr>

</table>

</td>

</tr>

</table>

</body>

</html>]]></description>
				<styleUrl>#IconStyle00</styleUrl>
				<Point>
					<coordinates>-116.7969223340984,43.46928257583028,0</coordinates>
				</Point>
			</Placemark>
			<Placemark id="ID_00130">
				<name>206</name>
				<Snippet maxLines="0"></Snippet>
				<description><![CDATA[<html xmlns:fo="http://www.w3.org/1999/XSL/Format" xmlns:msxsl="urn:schemas-microsoft-com:xslt">

<head>

<META http-equiv="Content-Type" content="text/html">

<meta http-equiv="content-type" content="text/html; charset=UTF-8">

</head>

<body style="margin:0px 0px 0px 0px;overflow:auto;background:#FFFFFF;">

<table style="font-family:Arial,Verdana,Times;font-size:12px;text-align:left;width:100%;border-collapse:collapse;padding:3px 3px 3px 3px">

<tr style="text-align:center;font-weight:bold;background:#9CBCE2">

<td>206</td>

</tr>

<tr>

<td>

<table style="font-family:Arial,Verdana,Times;font-size:12px;text-align:left;width:100%;border-spacing:0px; padding:3px 3px 3px 3px">

<tr>

<td>FID</td>

<td>130</td>

</tr>

<tr bgcolor="#D4E4F3">

<td>F1_for_irr</td>

<td>1</td>

</tr>

<tr>

<td>Name</td>

<td>206</td>

</tr>

<tr bgcolor="#D4E4F3">

<td>Name_2</td>

<td>206</td>

</tr>

<tr>

<td>Name_1</td>

<td>206</td>

</tr>

<tr bgcolor="#D4E4F3">

<td>F1_for_i_1</td>

<td>1</td>

</tr>

<tr>

<td>notes</td>

<td></td>

</tr>

<tr bgcolor="#D4E4F3">

<td>new_number</td>

<td>1</td>

</tr>

<tr>

<td>elevation</td>

<td>1084</td>

</tr>

</table>

</td>

</tr>

</table>

</body>

</html>]]></description>
				<styleUrl>#IconStyle00</styleUrl>
				<Point>
					<coordinates>-115.0791679270582,42.6293996879453,0</coordinates>
				</Point>
			</Placemark>
			<Placemark id="ID_00131">
				<name>208</name>
				<Snippet maxLines="0"></Snippet>
				<description><![CDATA[<html xmlns:fo="http://www.w3.org/1999/XSL/Format" xmlns:msxsl="urn:schemas-microsoft-com:xslt">

<head>

<META http-equiv="Content-Type" content="text/html">

<meta http-equiv="content-type" content="text/html; charset=UTF-8">

</head>

<body style="margin:0px 0px 0px 0px;overflow:auto;background:#FFFFFF;">

<table style="font-family:Arial,Verdana,Times;font-size:12px;text-align:left;width:100%;border-collapse:collapse;padding:3px 3px 3px 3px">

<tr style="text-align:center;font-weight:bold;background:#9CBCE2">

<td>208</td>

</tr>

<tr>

<td>

<table style="font-family:Arial,Verdana,Times;font-size:12px;text-align:left;width:100%;border-spacing:0px; padding:3px 3px 3px 3px">

<tr>

<td>FID</td>

<td>131</td>

</tr>

<tr bgcolor="#D4E4F3">

<td>F1_for_irr</td>

<td>1</td>

</tr>

<tr>

<td>Name</td>

<td>208</td>

</tr>

<tr bgcolor="#D4E4F3">

<td>Name_2</td>

<td>208</td>

</tr>

<tr>

<td>Name_1</td>

<td>208</td>

</tr>

<tr bgcolor="#D4E4F3">

<td>F1_for_i_1</td>

<td>1</td>

</tr>

<tr>

<td>notes</td>

<td></td>

</tr>

<tr bgcolor="#D4E4F3">

<td>new_number</td>

<td>1</td>

</tr>

<tr>

<td>elevation</td>

<td>742</td>

</tr>

</table>

</td>

</tr>

</table>

</body>

</html>]]></description>
				<styleUrl>#IconStyle00</styleUrl>
				<Point>
					<coordinates>-116.2256259601699,43.07622979716746,0</coordinates>
				</Point>
			</Placemark>
			<Placemark id="ID_00132">
				<name>209</name>
				<Snippet maxLines="0"></Snippet>
				<description><![CDATA[<html xmlns:fo="http://www.w3.org/1999/XSL/Format" xmlns:msxsl="urn:schemas-microsoft-com:xslt">

<head>

<META http-equiv="Content-Type" content="text/html">

<meta http-equiv="content-type" content="text/html; charset=UTF-8">

</head>

<body style="margin:0px 0px 0px 0px;overflow:auto;background:#FFFFFF;">

<table style="font-family:Arial,Verdana,Times;font-size:12px;text-align:left;width:100%;border-collapse:collapse;padding:3px 3px 3px 3px">

<tr style="text-align:center;font-weight:bold;background:#9CBCE2">

<td>209</td>

</tr>

<tr>

<td>

<table style="font-family:Arial,Verdana,Times;font-size:12px;text-align:left;width:100%;border-spacing:0px; padding:3px 3px 3px 3px">

<tr>

<td>FID</td>

<td>132</td>

</tr>

<tr bgcolor="#D4E4F3">

<td>F1_for_irr</td>

<td>1</td>

</tr>

<tr>

<td>Name</td>

<td>209</td>

</tr>

<tr bgcolor="#D4E4F3">

<td>Name_2</td>

<td>209</td>

</tr>

<tr>

<td>Name_1</td>

<td>209</td>

</tr>

<tr bgcolor="#D4E4F3">

<td>F1_for_i_1</td>

<td>1</td>

</tr>

<tr>

<td>notes</td>

<td></td>

</tr>

<tr bgcolor="#D4E4F3">

<td>new_number</td>

<td>1</td>

</tr>

<tr>

<td>elevation</td>

<td>719</td>

</tr>

</table>

</td>

</tr>

</table>

</body>

</html>]]></description>
				<styleUrl>#IconStyle00</styleUrl>
				<Point>
					<coordinates>-116.9680676676887,43.5832092466095,0</coordinates>
				</Point>
			</Placemark>
			<Placemark id="ID_00133">
				<name>210</name>
				<Snippet maxLines="0"></Snippet>
				<description><![CDATA[<html xmlns:fo="http://www.w3.org/1999/XSL/Format" xmlns:msxsl="urn:schemas-microsoft-com:xslt">

<head>

<META http-equiv="Content-Type" content="text/html">

<meta http-equiv="content-type" content="text/html; charset=UTF-8">

</head>

<body style="margin:0px 0px 0px 0px;overflow:auto;background:#FFFFFF;">

<table style="font-family:Arial,Verdana,Times;font-size:12px;text-align:left;width:100%;border-collapse:collapse;padding:3px 3px 3px 3px">

<tr style="text-align:center;font-weight:bold;background:#9CBCE2">

<td>210</td>

</tr>

<tr>

<td>

<table style="font-family:Arial,Verdana,Times;font-size:12px;text-align:left;width:100%;border-spacing:0px; padding:3px 3px 3px 3px">

<tr>

<td>FID</td>

<td>133</td>

</tr>

<tr bgcolor="#D4E4F3">

<td>F1_for_irr</td>

<td>1</td>

</tr>

<tr>

<td>Name</td>

<td>210</td>

</tr>

<tr bgcolor="#D4E4F3">

<td>Name_2</td>

<td>210</td>

</tr>

<tr>

<td>Name_1</td>

<td>210</td>

</tr>

<tr bgcolor="#D4E4F3">

<td>F1_for_i_1</td>

<td>1</td>

</tr>

<tr>

<td>notes</td>

<td></td>

</tr>

<tr bgcolor="#D4E4F3">

<td>new_number</td>

<td>1</td>

</tr>

<tr>

<td>elevation</td>

<td>694</td>

</tr>

</table>

</td>

</tr>

</table>

</body>

</html>]]></description>
				<styleUrl>#IconStyle00</styleUrl>
				<Point>
					<coordinates>-116.6831771150318,43.3966196252955,0</coordinates>
				</Point>
			</Placemark>
			<Placemark id="ID_00134">
				<name>211</name>
				<Snippet maxLines="0"></Snippet>
				<description><![CDATA[<html xmlns:fo="http://www.w3.org/1999/XSL/Format" xmlns:msxsl="urn:schemas-microsoft-com:xslt">

<head>

<META http-equiv="Content-Type" content="text/html">

<meta http-equiv="content-type" content="text/html; charset=UTF-8">

</head>

<body style="margin:0px 0px 0px 0px;overflow:auto;background:#FFFFFF;">

<table style="font-family:Arial,Verdana,Times;font-size:12px;text-align:left;width:100%;border-collapse:collapse;padding:3px 3px 3px 3px">

<tr style="text-align:center;font-weight:bold;background:#9CBCE2">

<td>211</td>

</tr>

<tr>

<td>

<table style="font-family:Arial,Verdana,Times;font-size:12px;text-align:left;width:100%;border-spacing:0px; padding:3px 3px 3px 3px">

<tr>

<td>FID</td>

<td>134</td>

</tr>

<tr bgcolor="#D4E4F3">

<td>F1_for_irr</td>

<td>1</td>

</tr>

<tr>

<td>Name</td>

<td>211</td>

</tr>

<tr bgcolor="#D4E4F3">

<td>Name_2</td>

<td>211</td>

</tr>

<tr>

<td>Name_1</td>

<td>211</td>

</tr>

<tr bgcolor="#D4E4F3">

<td>F1_for_i_1</td>

<td>1</td>

</tr>

<tr>

<td>notes</td>

<td></td>

</tr>

<tr bgcolor="#D4E4F3">

<td>new_number</td>

<td>1</td>

</tr>

<tr>

<td>elevation</td>

<td>704</td>

</tr>

</table>

</td>

</tr>

</table>

</body>

</html>]]></description>
				<styleUrl>#IconStyle00</styleUrl>
				<Point>
					<coordinates>-116.9778964590543,43.59979722466227,0</coordinates>
				</Point>
			</Placemark>
			<Placemark id="ID_00135">
				<name>212</name>
				<Snippet maxLines="0"></Snippet>
				<description><![CDATA[<html xmlns:fo="http://www.w3.org/1999/XSL/Format" xmlns:msxsl="urn:schemas-microsoft-com:xslt">

<head>

<META http-equiv="Content-Type" content="text/html">

<meta http-equiv="content-type" content="text/html; charset=UTF-8">

</head>

<body style="margin:0px 0px 0px 0px;overflow:auto;background:#FFFFFF;">

<table style="font-family:Arial,Verdana,Times;font-size:12px;text-align:left;width:100%;border-collapse:collapse;padding:3px 3px 3px 3px">

<tr style="text-align:center;font-weight:bold;background:#9CBCE2">

<td>212</td>

</tr>

<tr>

<td>

<table style="font-family:Arial,Verdana,Times;font-size:12px;text-align:left;width:100%;border-spacing:0px; padding:3px 3px 3px 3px">

<tr>

<td>FID</td>

<td>135</td>

</tr>

<tr bgcolor="#D4E4F3">

<td>F1_for_irr</td>

<td>1</td>

</tr>

<tr>

<td>Name</td>

<td>212</td>

</tr>

<tr bgcolor="#D4E4F3">

<td>Name_2</td>

<td>212</td>

</tr>

<tr>

<td>Name_1</td>

<td>212</td>

</tr>

<tr bgcolor="#D4E4F3">

<td>F1_for_i_1</td>

<td>1</td>

</tr>

<tr>

<td>notes</td>

<td></td>

</tr>

<tr bgcolor="#D4E4F3">

<td>new_number</td>

<td>1</td>

</tr>

<tr>

<td>elevation</td>

<td>705</td>

</tr>

</table>

</td>

</tr>

</table>

</body>

</html>]]></description>
				<styleUrl>#IconStyle00</styleUrl>
				<Point>
					<coordinates>-116.8449994755453,43.543084969196,0</coordinates>
				</Point>
			</Placemark>
			<Placemark id="ID_00136">
				<name>217</name>
				<Snippet maxLines="0"></Snippet>
				<description><![CDATA[<html xmlns:fo="http://www.w3.org/1999/XSL/Format" xmlns:msxsl="urn:schemas-microsoft-com:xslt">

<head>

<META http-equiv="Content-Type" content="text/html">

<meta http-equiv="content-type" content="text/html; charset=UTF-8">

</head>

<body style="margin:0px 0px 0px 0px;overflow:auto;background:#FFFFFF;">

<table style="font-family:Arial,Verdana,Times;font-size:12px;text-align:left;width:100%;border-collapse:collapse;padding:3px 3px 3px 3px">

<tr style="text-align:center;font-weight:bold;background:#9CBCE2">

<td>217</td>

</tr>

<tr>

<td>

<table style="font-family:Arial,Verdana,Times;font-size:12px;text-align:left;width:100%;border-spacing:0px; padding:3px 3px 3px 3px">

<tr>

<td>FID</td>

<td>136</td>

</tr>

<tr bgcolor="#D4E4F3">

<td>F1_for_irr</td>

<td>0</td>

</tr>

<tr>

<td>Name</td>

<td>217</td>

</tr>

<tr bgcolor="#D4E4F3">

<td>Name_2</td>

<td>217</td>

</tr>

<tr>

<td>Name_1</td>

<td>217</td>

</tr>

<tr bgcolor="#D4E4F3">

<td>F1_for_i_1</td>

<td>0</td>

</tr>

<tr>

<td>notes</td>

<td></td>

</tr>

<tr bgcolor="#D4E4F3">

<td>new_number</td>

<td>2</td>

</tr>

<tr>

<td>elevation</td>

<td>1624</td>

</tr>

</table>

</td>

</tr>

</table>

</body>

</html>]]></description>
				<styleUrl>#IconStyle09</styleUrl>
				<Point>
					<coordinates>-116.1718272131553,42.18362372265671,0</coordinates>
				</Point>
			</Placemark>
			<Placemark id="ID_00137">
				<name>218</name>
				<Snippet maxLines="0"></Snippet>
				<description><![CDATA[<html xmlns:fo="http://www.w3.org/1999/XSL/Format" xmlns:msxsl="urn:schemas-microsoft-com:xslt">

<head>

<META http-equiv="Content-Type" content="text/html">

<meta http-equiv="content-type" content="text/html; charset=UTF-8">

</head>

<body style="margin:0px 0px 0px 0px;overflow:auto;background:#FFFFFF;">

<table style="font-family:Arial,Verdana,Times;font-size:12px;text-align:left;width:100%;border-collapse:collapse;padding:3px 3px 3px 3px">

<tr style="text-align:center;font-weight:bold;background:#9CBCE2">

<td>218</td>

</tr>

<tr>

<td>

<table style="font-family:Arial,Verdana,Times;font-size:12px;text-align:left;width:100%;border-spacing:0px; padding:3px 3px 3px 3px">

<tr>

<td>FID</td>

<td>137</td>

</tr>

<tr bgcolor="#D4E4F3">

<td>F1_for_irr</td>

<td>0</td>

</tr>

<tr>

<td>Name</td>

<td>218</td>

</tr>

<tr bgcolor="#D4E4F3">

<td>Name_2</td>

<td>218</td>

</tr>

<tr>

<td>Name_1</td>

<td>218</td>

</tr>

<tr bgcolor="#D4E4F3">

<td>F1_for_i_1</td>

<td>0</td>

</tr>

<tr>

<td>notes</td>

<td></td>

</tr>

<tr bgcolor="#D4E4F3">

<td>new_number</td>

<td>2</td>

</tr>

<tr>

<td>elevation</td>

<td>1621</td>

</tr>

</table>

</td>

</tr>

</table>

</body>

</html>]]></description>
				<styleUrl>#IconStyle09</styleUrl>
				<Point>
					<coordinates>-116.1737853439184,42.17645982935767,0</coordinates>
				</Point>
			</Placemark>
			<Placemark id="ID_00138">
				<name>219</name>
				<Snippet maxLines="0"></Snippet>
				<description><![CDATA[<html xmlns:fo="http://www.w3.org/1999/XSL/Format" xmlns:msxsl="urn:schemas-microsoft-com:xslt">

<head>

<META http-equiv="Content-Type" content="text/html">

<meta http-equiv="content-type" content="text/html; charset=UTF-8">

</head>

<body style="margin:0px 0px 0px 0px;overflow:auto;background:#FFFFFF;">

<table style="font-family:Arial,Verdana,Times;font-size:12px;text-align:left;width:100%;border-collapse:collapse;padding:3px 3px 3px 3px">

<tr style="text-align:center;font-weight:bold;background:#9CBCE2">

<td>219</td>

</tr>

<tr>

<td>

<table style="font-family:Arial,Verdana,Times;font-size:12px;text-align:left;width:100%;border-spacing:0px; padding:3px 3px 3px 3px">

<tr>

<td>FID</td>

<td>138</td>

</tr>

<tr bgcolor="#D4E4F3">

<td>F1_for_irr</td>

<td>0</td>

</tr>

<tr>

<td>Name</td>

<td>219</td>

</tr>

<tr bgcolor="#D4E4F3">

<td>Name_2</td>

<td>219</td>

</tr>

<tr>

<td>Name_1</td>

<td>219</td>

</tr>

<tr bgcolor="#D4E4F3">

<td>F1_for_i_1</td>

<td>0</td>

</tr>

<tr>

<td>notes</td>

<td></td>

</tr>

<tr bgcolor="#D4E4F3">

<td>new_number</td>

<td>2</td>

</tr>

<tr>

<td>elevation</td>

<td>1376</td>

</tr>

</table>

</td>

</tr>

</table>

</body>

</html>]]></description>
				<styleUrl>#IconStyle09</styleUrl>
				<Point>
					<coordinates>-117.0130439494187,42.95304835699614,0</coordinates>
				</Point>
			</Placemark>
			<Placemark id="ID_00139">
				<name>220</name>
				<Snippet maxLines="0"></Snippet>
				<description><![CDATA[<html xmlns:fo="http://www.w3.org/1999/XSL/Format" xmlns:msxsl="urn:schemas-microsoft-com:xslt">

<head>

<META http-equiv="Content-Type" content="text/html">

<meta http-equiv="content-type" content="text/html; charset=UTF-8">

</head>

<body style="margin:0px 0px 0px 0px;overflow:auto;background:#FFFFFF;">

<table style="font-family:Arial,Verdana,Times;font-size:12px;text-align:left;width:100%;border-collapse:collapse;padding:3px 3px 3px 3px">

<tr style="text-align:center;font-weight:bold;background:#9CBCE2">

<td>220</td>

</tr>

<tr>

<td>

<table style="font-family:Arial,Verdana,Times;font-size:12px;text-align:left;width:100%;border-spacing:0px; padding:3px 3px 3px 3px">

<tr>

<td>FID</td>

<td>139</td>

</tr>

<tr bgcolor="#D4E4F3">

<td>F1_for_irr</td>

<td>0</td>

</tr>

<tr>

<td>Name</td>

<td>220</td>

</tr>

<tr bgcolor="#D4E4F3">

<td>Name_2</td>

<td>220</td>

</tr>

<tr>

<td>Name_1</td>

<td>220</td>

</tr>

<tr bgcolor="#D4E4F3">

<td>F1_for_i_1</td>

<td>0</td>

</tr>

<tr>

<td>notes</td>

<td></td>

</tr>

<tr bgcolor="#D4E4F3">

<td>new_number</td>

<td>0</td>

</tr>

<tr>

<td>elevation</td>

<td>1562</td>

</tr>

</table>

</td>

</tr>

</table>

</body>

</html>]]></description>
				<styleUrl>#IconStyle09</styleUrl>
				<Point>
					<coordinates>-115.8764271506924,42.35581959030191,0</coordinates>
				</Point>
			</Placemark>
			<Placemark id="ID_00140">
				<name>221</name>
				<Snippet maxLines="0"></Snippet>
				<description><![CDATA[<html xmlns:fo="http://www.w3.org/1999/XSL/Format" xmlns:msxsl="urn:schemas-microsoft-com:xslt">

<head>

<META http-equiv="Content-Type" content="text/html">

<meta http-equiv="content-type" content="text/html; charset=UTF-8">

</head>

<body style="margin:0px 0px 0px 0px;overflow:auto;background:#FFFFFF;">

<table style="font-family:Arial,Verdana,Times;font-size:12px;text-align:left;width:100%;border-collapse:collapse;padding:3px 3px 3px 3px">

<tr style="text-align:center;font-weight:bold;background:#9CBCE2">

<td>221</td>

</tr>

<tr>

<td>

<table style="font-family:Arial,Verdana,Times;font-size:12px;text-align:left;width:100%;border-spacing:0px; padding:3px 3px 3px 3px">

<tr>

<td>FID</td>

<td>140</td>

</tr>

<tr bgcolor="#D4E4F3">

<td>F1_for_irr</td>

<td>0</td>

</tr>

<tr>

<td>Name</td>

<td>221</td>

</tr>

<tr bgcolor="#D4E4F3">

<td>Name_2</td>

<td>221</td>

</tr>

<tr>

<td>Name_1</td>

<td>221</td>

</tr>

<tr bgcolor="#D4E4F3">

<td>F1_for_i_1</td>

<td>0</td>

</tr>

<tr>

<td>notes</td>

<td>wheat</td>

</tr>

<tr bgcolor="#D4E4F3">

<td>new_number</td>

<td>2</td>

</tr>

<tr>

<td>elevation</td>

<td>813</td>

</tr>

</table>

</td>

</tr>

</table>

</body>

</html>]]></description>
				<styleUrl>#IconStyle09</styleUrl>
				<Point>
					<coordinates>-115.535720301151,42.89656874355273,0</coordinates>
				</Point>
			</Placemark>
			<Placemark id="ID_00141">
				<name>223</name>
				<Snippet maxLines="0"></Snippet>
				<description><![CDATA[<html xmlns:fo="http://www.w3.org/1999/XSL/Format" xmlns:msxsl="urn:schemas-microsoft-com:xslt">

<head>

<META http-equiv="Content-Type" content="text/html">

<meta http-equiv="content-type" content="text/html; charset=UTF-8">

</head>

<body style="margin:0px 0px 0px 0px;overflow:auto;background:#FFFFFF;">

<table style="font-family:Arial,Verdana,Times;font-size:12px;text-align:left;width:100%;border-collapse:collapse;padding:3px 3px 3px 3px">

<tr style="text-align:center;font-weight:bold;background:#9CBCE2">

<td>223</td>

</tr>

<tr>

<td>

<table style="font-family:Arial,Verdana,Times;font-size:12px;text-align:left;width:100%;border-spacing:0px; padding:3px 3px 3px 3px">

<tr>

<td>FID</td>

<td>141</td>

</tr>

<tr bgcolor="#D4E4F3">

<td>F1_for_irr</td>

<td>1</td>

</tr>

<tr>

<td>Name</td>

<td>223</td>

</tr>

<tr bgcolor="#D4E4F3">

<td>Name_2</td>

<td>223</td>

</tr>

<tr>

<td>Name_1</td>

<td>223</td>

</tr>

<tr bgcolor="#D4E4F3">

<td>F1_for_i_1</td>

<td>1</td>

</tr>

<tr>

<td>notes</td>

<td></td>

</tr>

<tr bgcolor="#D4E4F3">

<td>new_number</td>

<td>1</td>

</tr>

<tr>

<td>elevation</td>

<td>1024</td>

</tr>

</table>

</td>

</tr>

</table>

</body>

</html>]]></description>
				<styleUrl>#IconStyle00</styleUrl>
				<Point>
					<coordinates>-114.8891773773341,42.72144641901707,0</coordinates>
				</Point>
			</Placemark>
			<Placemark id="ID_00142">
				<name>224</name>
				<Snippet maxLines="0"></Snippet>
				<description><![CDATA[<html xmlns:fo="http://www.w3.org/1999/XSL/Format" xmlns:msxsl="urn:schemas-microsoft-com:xslt">

<head>

<META http-equiv="Content-Type" content="text/html">

<meta http-equiv="content-type" content="text/html; charset=UTF-8">

</head>

<body style="margin:0px 0px 0px 0px;overflow:auto;background:#FFFFFF;">

<table style="font-family:Arial,Verdana,Times;font-size:12px;text-align:left;width:100%;border-collapse:collapse;padding:3px 3px 3px 3px">

<tr style="text-align:center;font-weight:bold;background:#9CBCE2">

<td>224</td>

</tr>

<tr>

<td>

<table style="font-family:Arial,Verdana,Times;font-size:12px;text-align:left;width:100%;border-spacing:0px; padding:3px 3px 3px 3px">

<tr>

<td>FID</td>

<td>142</td>

</tr>

<tr bgcolor="#D4E4F3">

<td>F1_for_irr</td>

<td>1</td>

</tr>

<tr>

<td>Name</td>

<td>224</td>

</tr>

<tr bgcolor="#D4E4F3">

<td>Name_2</td>

<td>224</td>

</tr>

<tr>

<td>Name_1</td>

<td>224</td>

</tr>

<tr bgcolor="#D4E4F3">

<td>F1_for_i_1</td>

<td>1</td>

</tr>

<tr>

<td>notes</td>

<td></td>

</tr>

<tr bgcolor="#D4E4F3">

<td>new_number</td>

<td>1</td>

</tr>

<tr>

<td>elevation</td>

<td>1028</td>

</tr>

</table>

</td>

</tr>

</table>

</body>

</html>]]></description>
				<styleUrl>#IconStyle00</styleUrl>
				<Point>
					<coordinates>-114.8988374549845,42.71422197076737,0</coordinates>
				</Point>
			</Placemark>
			<Placemark id="ID_00143">
				<name>225</name>
				<Snippet maxLines="0"></Snippet>
				<description><![CDATA[<html xmlns:fo="http://www.w3.org/1999/XSL/Format" xmlns:msxsl="urn:schemas-microsoft-com:xslt">

<head>

<META http-equiv="Content-Type" content="text/html">

<meta http-equiv="content-type" content="text/html; charset=UTF-8">

</head>

<body style="margin:0px 0px 0px 0px;overflow:auto;background:#FFFFFF;">

<table style="font-family:Arial,Verdana,Times;font-size:12px;text-align:left;width:100%;border-collapse:collapse;padding:3px 3px 3px 3px">

<tr style="text-align:center;font-weight:bold;background:#9CBCE2">

<td>225</td>

</tr>

<tr>

<td>

<table style="font-family:Arial,Verdana,Times;font-size:12px;text-align:left;width:100%;border-spacing:0px; padding:3px 3px 3px 3px">

<tr>

<td>FID</td>

<td>143</td>

</tr>

<tr bgcolor="#D4E4F3">

<td>F1_for_irr</td>

<td>1</td>

</tr>

<tr>

<td>Name</td>

<td>225</td>

</tr>

<tr bgcolor="#D4E4F3">

<td>Name_2</td>

<td>225</td>

</tr>

<tr>

<td>Name_1</td>

<td>225</td>

</tr>

<tr bgcolor="#D4E4F3">

<td>F1_for_i_1</td>

<td>1</td>

</tr>

<tr>

<td>notes</td>

<td></td>

</tr>

<tr bgcolor="#D4E4F3">

<td>new_number</td>

<td>1</td>

</tr>

<tr>

<td>elevation</td>

<td>1049</td>

</tr>

</table>

</td>

</tr>

</table>

</body>

</html>]]></description>
				<styleUrl>#IconStyle00</styleUrl>
				<Point>
					<coordinates>-114.9137701408793,42.71464813520333,0</coordinates>
				</Point>
			</Placemark>
			<Placemark id="ID_00144">
				<name>226</name>
				<Snippet maxLines="0"></Snippet>
				<description><![CDATA[<html xmlns:fo="http://www.w3.org/1999/XSL/Format" xmlns:msxsl="urn:schemas-microsoft-com:xslt">

<head>

<META http-equiv="Content-Type" content="text/html">

<meta http-equiv="content-type" content="text/html; charset=UTF-8">

</head>

<body style="margin:0px 0px 0px 0px;overflow:auto;background:#FFFFFF;">

<table style="font-family:Arial,Verdana,Times;font-size:12px;text-align:left;width:100%;border-collapse:collapse;padding:3px 3px 3px 3px">

<tr style="text-align:center;font-weight:bold;background:#9CBCE2">

<td>226</td>

</tr>

<tr>

<td>

<table style="font-family:Arial,Verdana,Times;font-size:12px;text-align:left;width:100%;border-spacing:0px; padding:3px 3px 3px 3px">

<tr>

<td>FID</td>

<td>144</td>

</tr>

<tr bgcolor="#D4E4F3">

<td>F1_for_irr</td>

<td>1</td>

</tr>

<tr>

<td>Name</td>

<td>226</td>

</tr>

<tr bgcolor="#D4E4F3">

<td>Name_2</td>

<td>226</td>

</tr>

<tr>

<td>Name_1</td>

<td>226</td>

</tr>

<tr bgcolor="#D4E4F3">

<td>F1_for_i_1</td>

<td>1</td>

</tr>

<tr>

<td>notes</td>

<td></td>

</tr>

<tr bgcolor="#D4E4F3">

<td>new_number</td>

<td>1</td>

</tr>

<tr>

<td>elevation</td>

<td>1155</td>

</tr>

</table>

</td>

</tr>

</table>

</body>

</html>]]></description>
				<styleUrl>#IconStyle00</styleUrl>
				<Point>
					<coordinates>-115.0299864343265,42.58566318460834,0</coordinates>
				</Point>
			</Placemark>
			<Placemark id="ID_00145">
				<name>227</name>
				<Snippet maxLines="0"></Snippet>
				<description><![CDATA[<html xmlns:fo="http://www.w3.org/1999/XSL/Format" xmlns:msxsl="urn:schemas-microsoft-com:xslt">

<head>

<META http-equiv="Content-Type" content="text/html">

<meta http-equiv="content-type" content="text/html; charset=UTF-8">

</head>

<body style="margin:0px 0px 0px 0px;overflow:auto;background:#FFFFFF;">

<table style="font-family:Arial,Verdana,Times;font-size:12px;text-align:left;width:100%;border-collapse:collapse;padding:3px 3px 3px 3px">

<tr style="text-align:center;font-weight:bold;background:#9CBCE2">

<td>227</td>

</tr>

<tr>

<td>

<table style="font-family:Arial,Verdana,Times;font-size:12px;text-align:left;width:100%;border-spacing:0px; padding:3px 3px 3px 3px">

<tr>

<td>FID</td>

<td>145</td>

</tr>

<tr bgcolor="#D4E4F3">

<td>F1_for_irr</td>

<td>1</td>

</tr>

<tr>

<td>Name</td>

<td>227</td>

</tr>

<tr bgcolor="#D4E4F3">

<td>Name_2</td>

<td>227</td>

</tr>

<tr>

<td>Name_1</td>

<td>227</td>

</tr>

<tr bgcolor="#D4E4F3">

<td>F1_for_i_1</td>

<td>1</td>

</tr>

<tr>

<td>notes</td>

<td></td>

</tr>

<tr bgcolor="#D4E4F3">

<td>new_number</td>

<td>1</td>

</tr>

<tr>

<td>elevation</td>

<td>1391</td>

</tr>

</table>

</td>

</tr>

</table>

</body>

</html>]]></description>
				<styleUrl>#IconStyle00</styleUrl>
				<Point>
					<coordinates>-114.9223064526806,42.38611047721679,0</coordinates>
				</Point>
			</Placemark>
			<Placemark id="ID_00146">
				<name>228</name>
				<Snippet maxLines="0"></Snippet>
				<description><![CDATA[<html xmlns:fo="http://www.w3.org/1999/XSL/Format" xmlns:msxsl="urn:schemas-microsoft-com:xslt">

<head>

<META http-equiv="Content-Type" content="text/html">

<meta http-equiv="content-type" content="text/html; charset=UTF-8">

</head>

<body style="margin:0px 0px 0px 0px;overflow:auto;background:#FFFFFF;">

<table style="font-family:Arial,Verdana,Times;font-size:12px;text-align:left;width:100%;border-collapse:collapse;padding:3px 3px 3px 3px">

<tr style="text-align:center;font-weight:bold;background:#9CBCE2">

<td>228</td>

</tr>

<tr>

<td>

<table style="font-family:Arial,Verdana,Times;font-size:12px;text-align:left;width:100%;border-spacing:0px; padding:3px 3px 3px 3px">

<tr>

<td>FID</td>

<td>146</td>

</tr>

<tr bgcolor="#D4E4F3">

<td>F1_for_irr</td>

<td>1</td>

</tr>

<tr>

<td>Name</td>

<td>228</td>

</tr>

<tr bgcolor="#D4E4F3">

<td>Name_2</td>

<td>228</td>

</tr>

<tr>

<td>Name_1</td>

<td>228</td>

</tr>

<tr bgcolor="#D4E4F3">

<td>F1_for_i_1</td>

<td>1</td>

</tr>

<tr>

<td>notes</td>

<td></td>

</tr>

<tr bgcolor="#D4E4F3">

<td>new_number</td>

<td>1</td>

</tr>

<tr>

<td>elevation</td>

<td>1505</td>

</tr>

</table>

</td>

</tr>

</table>

</body>

</html>]]></description>
				<styleUrl>#IconStyle00</styleUrl>
				<Point>
					<coordinates>-114.6786565022957,42.19741538651095,0</coordinates>
				</Point>
			</Placemark>
			<Placemark id="ID_00147">
				<name>229</name>
				<Snippet maxLines="0"></Snippet>
				<description><![CDATA[<html xmlns:fo="http://www.w3.org/1999/XSL/Format" xmlns:msxsl="urn:schemas-microsoft-com:xslt">

<head>

<META http-equiv="Content-Type" content="text/html">

<meta http-equiv="content-type" content="text/html; charset=UTF-8">

</head>

<body style="margin:0px 0px 0px 0px;overflow:auto;background:#FFFFFF;">

<table style="font-family:Arial,Verdana,Times;font-size:12px;text-align:left;width:100%;border-collapse:collapse;padding:3px 3px 3px 3px">

<tr style="text-align:center;font-weight:bold;background:#9CBCE2">

<td>229</td>

</tr>

<tr>

<td>

<table style="font-family:Arial,Verdana,Times;font-size:12px;text-align:left;width:100%;border-spacing:0px; padding:3px 3px 3px 3px">

<tr>

<td>FID</td>

<td>147</td>

</tr>

<tr bgcolor="#D4E4F3">

<td>F1_for_irr</td>

<td>1</td>

</tr>

<tr>

<td>Name</td>

<td>229</td>

</tr>

<tr bgcolor="#D4E4F3">

<td>Name_2</td>

<td>229</td>

</tr>

<tr>

<td>Name_1</td>

<td>229</td>

</tr>

<tr bgcolor="#D4E4F3">

<td>F1_for_i_1</td>

<td>1</td>

</tr>

<tr>

<td>notes</td>

<td></td>

</tr>

<tr bgcolor="#D4E4F3">

<td>new_number</td>

<td>1</td>

</tr>

<tr>

<td>elevation</td>

<td>1380</td>

</tr>

</table>

</td>

</tr>

</table>

</body>

</html>]]></description>
				<styleUrl>#IconStyle00</styleUrl>
				<Point>
					<coordinates>-114.6679094725441,42.34218617834949,0</coordinates>
				</Point>
			</Placemark>
			<Placemark id="ID_00148">
				<name>230</name>
				<Snippet maxLines="0"></Snippet>
				<description><![CDATA[<html xmlns:fo="http://www.w3.org/1999/XSL/Format" xmlns:msxsl="urn:schemas-microsoft-com:xslt">

<head>

<META http-equiv="Content-Type" content="text/html">

<meta http-equiv="content-type" content="text/html; charset=UTF-8">

</head>

<body style="margin:0px 0px 0px 0px;overflow:auto;background:#FFFFFF;">

<table style="font-family:Arial,Verdana,Times;font-size:12px;text-align:left;width:100%;border-collapse:collapse;padding:3px 3px 3px 3px">

<tr style="text-align:center;font-weight:bold;background:#9CBCE2">

<td>230</td>

</tr>

<tr>

<td>

<table style="font-family:Arial,Verdana,Times;font-size:12px;text-align:left;width:100%;border-spacing:0px; padding:3px 3px 3px 3px">

<tr>

<td>FID</td>

<td>148</td>

</tr>

<tr bgcolor="#D4E4F3">

<td>F1_for_irr</td>

<td>1</td>

</tr>

<tr>

<td>Name</td>

<td>230</td>

</tr>

<tr bgcolor="#D4E4F3">

<td>Name_2</td>

<td>230</td>

</tr>

<tr>

<td>Name_1</td>

<td>230</td>

</tr>

<tr bgcolor="#D4E4F3">

<td>F1_for_i_1</td>

<td>1</td>

</tr>

<tr>

<td>notes</td>

<td></td>

</tr>

<tr bgcolor="#D4E4F3">

<td>new_number</td>

<td>1</td>

</tr>

<tr>

<td>elevation</td>

<td>1351</td>

</tr>

</table>

</td>

</tr>

</table>

</body>

</html>]]></description>
				<styleUrl>#IconStyle00</styleUrl>
				<Point>
					<coordinates>-114.4843231354043,42.37161362976525,0</coordinates>
				</Point>
			</Placemark>
			<Placemark id="ID_00149">
				<name>231</name>
				<Snippet maxLines="0"></Snippet>
				<description><![CDATA[<html xmlns:fo="http://www.w3.org/1999/XSL/Format" xmlns:msxsl="urn:schemas-microsoft-com:xslt">

<head>

<META http-equiv="Content-Type" content="text/html">

<meta http-equiv="content-type" content="text/html; charset=UTF-8">

</head>

<body style="margin:0px 0px 0px 0px;overflow:auto;background:#FFFFFF;">

<table style="font-family:Arial,Verdana,Times;font-size:12px;text-align:left;width:100%;border-collapse:collapse;padding:3px 3px 3px 3px">

<tr style="text-align:center;font-weight:bold;background:#9CBCE2">

<td>231</td>

</tr>

<tr>

<td>

<table style="font-family:Arial,Verdana,Times;font-size:12px;text-align:left;width:100%;border-spacing:0px; padding:3px 3px 3px 3px">

<tr>

<td>FID</td>

<td>149</td>

</tr>

<tr bgcolor="#D4E4F3">

<td>F1_for_irr</td>

<td>1</td>

</tr>

<tr>

<td>Name</td>

<td>231</td>

</tr>

<tr bgcolor="#D4E4F3">

<td>Name_2</td>

<td>231</td>

</tr>

<tr>

<td>Name_1</td>

<td>231</td>

</tr>

<tr bgcolor="#D4E4F3">

<td>F1_for_i_1</td>

<td>1</td>

</tr>

<tr>

<td>notes</td>

<td></td>

</tr>

<tr bgcolor="#D4E4F3">

<td>new_number</td>

<td>1</td>

</tr>

<tr>

<td>elevation</td>

<td>1151</td>

</tr>

</table>

</td>

</tr>

</table>

</body>

</html>]]></description>
				<styleUrl>#IconStyle00</styleUrl>
				<Point>
					<coordinates>-114.4138669296151,42.55956658552952,0</coordinates>
				</Point>
			</Placemark>
			<Placemark id="ID_00150">
				<name>232</name>
				<Snippet maxLines="0"></Snippet>
				<description><![CDATA[<html xmlns:fo="http://www.w3.org/1999/XSL/Format" xmlns:msxsl="urn:schemas-microsoft-com:xslt">

<head>

<META http-equiv="Content-Type" content="text/html">

<meta http-equiv="content-type" content="text/html; charset=UTF-8">

</head>

<body style="margin:0px 0px 0px 0px;overflow:auto;background:#FFFFFF;">

<table style="font-family:Arial,Verdana,Times;font-size:12px;text-align:left;width:100%;border-collapse:collapse;padding:3px 3px 3px 3px">

<tr style="text-align:center;font-weight:bold;background:#9CBCE2">

<td>232</td>

</tr>

<tr>

<td>

<table style="font-family:Arial,Verdana,Times;font-size:12px;text-align:left;width:100%;border-spacing:0px; padding:3px 3px 3px 3px">

<tr>

<td>FID</td>

<td>150</td>

</tr>

<tr bgcolor="#D4E4F3">

<td>F1_for_irr</td>

<td>1</td>

</tr>

<tr>

<td>Name</td>

<td>232</td>

</tr>

<tr bgcolor="#D4E4F3">

<td>Name_2</td>

<td>232</td>

</tr>

<tr>

<td>Name_1</td>

<td>232</td>

</tr>

<tr bgcolor="#D4E4F3">

<td>F1_for_i_1</td>

<td>1</td>

</tr>

<tr>

<td>notes</td>

<td></td>

</tr>

<tr bgcolor="#D4E4F3">

<td>new_number</td>

<td>1</td>

</tr>

<tr>

<td>elevation</td>

<td>1285</td>

</tr>

</table>

</td>

</tr>

</table>

</body>

</html>]]></description>
				<styleUrl>#IconStyle00</styleUrl>
				<Point>
					<coordinates>-114.2052714608092,42.42817300408092,0</coordinates>
				</Point>
			</Placemark>
			<Placemark id="ID_00151">
				<name>233</name>
				<Snippet maxLines="0"></Snippet>
				<description><![CDATA[<html xmlns:fo="http://www.w3.org/1999/XSL/Format" xmlns:msxsl="urn:schemas-microsoft-com:xslt">

<head>

<META http-equiv="Content-Type" content="text/html">

<meta http-equiv="content-type" content="text/html; charset=UTF-8">

</head>

<body style="margin:0px 0px 0px 0px;overflow:auto;background:#FFFFFF;">

<table style="font-family:Arial,Verdana,Times;font-size:12px;text-align:left;width:100%;border-collapse:collapse;padding:3px 3px 3px 3px">

<tr style="text-align:center;font-weight:bold;background:#9CBCE2">

<td>233</td>

</tr>

<tr>

<td>

<table style="font-family:Arial,Verdana,Times;font-size:12px;text-align:left;width:100%;border-spacing:0px; padding:3px 3px 3px 3px">

<tr>

<td>FID</td>

<td>151</td>

</tr>

<tr bgcolor="#D4E4F3">

<td>F1_for_irr</td>

<td>0</td>

</tr>

<tr>

<td>Name</td>

<td>233</td>

</tr>

<tr bgcolor="#D4E4F3">

<td>Name_2</td>

<td>233</td>

</tr>

<tr>

<td>Name_1</td>

<td>233</td>

</tr>

<tr bgcolor="#D4E4F3">

<td>F1_for_i_1</td>

<td>0</td>

</tr>

<tr>

<td>notes</td>

<td></td>

</tr>

<tr bgcolor="#D4E4F3">

<td>new_number</td>

<td>0</td>

</tr>

<tr>

<td>elevation</td>

<td>1014</td>

</tr>

</table>

</td>

</tr>

</table>

</body>

</html>]]></description>
				<styleUrl>#IconStyle09</styleUrl>
				<Point>
					<coordinates>-114.9640036848222,42.89783969784384,0</coordinates>
				</Point>
			</Placemark>
			<Placemark id="ID_00152">
				<name>234</name>
				<Snippet maxLines="0"></Snippet>
				<description><![CDATA[<html xmlns:fo="http://www.w3.org/1999/XSL/Format" xmlns:msxsl="urn:schemas-microsoft-com:xslt">

<head>

<META http-equiv="Content-Type" content="text/html">

<meta http-equiv="content-type" content="text/html; charset=UTF-8">

</head>

<body style="margin:0px 0px 0px 0px;overflow:auto;background:#FFFFFF;">

<table style="font-family:Arial,Verdana,Times;font-size:12px;text-align:left;width:100%;border-collapse:collapse;padding:3px 3px 3px 3px">

<tr style="text-align:center;font-weight:bold;background:#9CBCE2">

<td>234</td>

</tr>

<tr>

<td>

<table style="font-family:Arial,Verdana,Times;font-size:12px;text-align:left;width:100%;border-spacing:0px; padding:3px 3px 3px 3px">

<tr>

<td>FID</td>

<td>152</td>

</tr>

<tr bgcolor="#D4E4F3">

<td>F1_for_irr</td>

<td>0</td>

</tr>

<tr>

<td>Name</td>

<td>234</td>

</tr>

<tr bgcolor="#D4E4F3">

<td>Name_2</td>

<td>234</td>

</tr>

<tr>

<td>Name_1</td>

<td>234</td>

</tr>

<tr bgcolor="#D4E4F3">

<td>F1_for_i_1</td>

<td>0</td>

</tr>

<tr>

<td>notes</td>

<td></td>

</tr>

<tr bgcolor="#D4E4F3">

<td>new_number</td>

<td>0</td>

</tr>

<tr>

<td>elevation</td>

<td>1152</td>

</tr>

</table>

</td>

</tr>

</table>

</body>

</html>]]></description>
				<styleUrl>#IconStyle09</styleUrl>
				<Point>
					<coordinates>-114.9087621896233,42.61024140521676,0</coordinates>
				</Point>
			</Placemark>
			<Placemark id="ID_00153">
				<name>236</name>
				<Snippet maxLines="0"></Snippet>
				<description><![CDATA[<html xmlns:fo="http://www.w3.org/1999/XSL/Format" xmlns:msxsl="urn:schemas-microsoft-com:xslt">

<head>

<META http-equiv="Content-Type" content="text/html">

<meta http-equiv="content-type" content="text/html; charset=UTF-8">

</head>

<body style="margin:0px 0px 0px 0px;overflow:auto;background:#FFFFFF;">

<table style="font-family:Arial,Verdana,Times;font-size:12px;text-align:left;width:100%;border-collapse:collapse;padding:3px 3px 3px 3px">

<tr style="text-align:center;font-weight:bold;background:#9CBCE2">

<td>236</td>

</tr>

<tr>

<td>

<table style="font-family:Arial,Verdana,Times;font-size:12px;text-align:left;width:100%;border-spacing:0px; padding:3px 3px 3px 3px">

<tr>

<td>FID</td>

<td>153</td>

</tr>

<tr bgcolor="#D4E4F3">

<td>F1_for_irr</td>

<td>0</td>

</tr>

<tr>

<td>Name</td>

<td>236</td>

</tr>

<tr bgcolor="#D4E4F3">

<td>Name_2</td>

<td>236</td>

</tr>

<tr>

<td>Name_1</td>

<td>236</td>

</tr>

<tr bgcolor="#D4E4F3">

<td>F1_for_i_1</td>

<td>0</td>

</tr>

<tr>

<td>notes</td>

<td></td>

</tr>

<tr bgcolor="#D4E4F3">

<td>new_number</td>

<td>0</td>

</tr>

<tr>

<td>elevation</td>

<td>1542</td>

</tr>

</table>

</td>

</tr>

</table>

</body>

</html>]]></description>
				<styleUrl>#IconStyle09</styleUrl>
				<Point>
					<coordinates>-114.5017655035751,42.2550336603752,0</coordinates>
				</Point>
			</Placemark>
			<Placemark id="ID_00154">
				<name>239</name>
				<Snippet maxLines="0"></Snippet>
				<description><![CDATA[<html xmlns:fo="http://www.w3.org/1999/XSL/Format" xmlns:msxsl="urn:schemas-microsoft-com:xslt">

<head>

<META http-equiv="Content-Type" content="text/html">

<meta http-equiv="content-type" content="text/html; charset=UTF-8">

</head>

<body style="margin:0px 0px 0px 0px;overflow:auto;background:#FFFFFF;">

<table style="font-family:Arial,Verdana,Times;font-size:12px;text-align:left;width:100%;border-collapse:collapse;padding:3px 3px 3px 3px">

<tr style="text-align:center;font-weight:bold;background:#9CBCE2">

<td>239</td>

</tr>

<tr>

<td>

<table style="font-family:Arial,Verdana,Times;font-size:12px;text-align:left;width:100%;border-spacing:0px; padding:3px 3px 3px 3px">

<tr>

<td>FID</td>

<td>154</td>

</tr>

<tr bgcolor="#D4E4F3">

<td>F1_for_irr</td>

<td>0</td>

</tr>

<tr>

<td>Name</td>

<td>239</td>

</tr>

<tr bgcolor="#D4E4F3">

<td>Name_2</td>

<td>239</td>

</tr>

<tr>

<td>Name_1</td>

<td>239</td>

</tr>

<tr bgcolor="#D4E4F3">

<td>F1_for_i_1</td>

<td>0</td>

</tr>

<tr>

<td>notes</td>

<td>wheat</td>

</tr>

<tr bgcolor="#D4E4F3">

<td>new_number</td>

<td>2</td>

</tr>

<tr>

<td>elevation</td>

<td>1363</td>

</tr>

</table>

</td>

</tr>

</table>

</body>

</html>]]></description>
				<styleUrl>#IconStyle09</styleUrl>
				<Point>
					<coordinates>-114.4628493223383,42.36624127951149,0</coordinates>
				</Point>
			</Placemark>
			<Placemark id="ID_00155">
				<name>241</name>
				<Snippet maxLines="0"></Snippet>
				<description><![CDATA[<html xmlns:fo="http://www.w3.org/1999/XSL/Format" xmlns:msxsl="urn:schemas-microsoft-com:xslt">

<head>

<META http-equiv="Content-Type" content="text/html">

<meta http-equiv="content-type" content="text/html; charset=UTF-8">

</head>

<body style="margin:0px 0px 0px 0px;overflow:auto;background:#FFFFFF;">

<table style="font-family:Arial,Verdana,Times;font-size:12px;text-align:left;width:100%;border-collapse:collapse;padding:3px 3px 3px 3px">

<tr style="text-align:center;font-weight:bold;background:#9CBCE2">

<td>241</td>

</tr>

<tr>

<td>

<table style="font-family:Arial,Verdana,Times;font-size:12px;text-align:left;width:100%;border-spacing:0px; padding:3px 3px 3px 3px">

<tr>

<td>FID</td>

<td>155</td>

</tr>

<tr bgcolor="#D4E4F3">

<td>F1_for_irr</td>

<td>0</td>

</tr>

<tr>

<td>Name</td>

<td>241</td>

</tr>

<tr bgcolor="#D4E4F3">

<td>Name_2</td>

<td>241</td>

</tr>

<tr>

<td>Name_1</td>

<td>241</td>

</tr>

<tr bgcolor="#D4E4F3">

<td>F1_for_i_1</td>

<td>0</td>

</tr>

<tr>

<td>notes</td>

<td></td>

</tr>

<tr bgcolor="#D4E4F3">

<td>new_number</td>

<td>0</td>

</tr>

<tr>

<td>elevation</td>

<td>1316</td>

</tr>

</table>

</td>

</tr>

</table>

</body>

</html>]]></description>
				<styleUrl>#IconStyle09</styleUrl>
				<Point>
					<coordinates>-114.3088844941241,42.42019022230096,0</coordinates>
				</Point>
			</Placemark>
			<Placemark id="ID_00156">
				<name>242</name>
				<Snippet maxLines="0"></Snippet>
				<description><![CDATA[<html xmlns:fo="http://www.w3.org/1999/XSL/Format" xmlns:msxsl="urn:schemas-microsoft-com:xslt">

<head>

<META http-equiv="Content-Type" content="text/html">

<meta http-equiv="content-type" content="text/html; charset=UTF-8">

</head>

<body style="margin:0px 0px 0px 0px;overflow:auto;background:#FFFFFF;">

<table style="font-family:Arial,Verdana,Times;font-size:12px;text-align:left;width:100%;border-collapse:collapse;padding:3px 3px 3px 3px">

<tr style="text-align:center;font-weight:bold;background:#9CBCE2">

<td>242</td>

</tr>

<tr>

<td>

<table style="font-family:Arial,Verdana,Times;font-size:12px;text-align:left;width:100%;border-spacing:0px; padding:3px 3px 3px 3px">

<tr>

<td>FID</td>

<td>156</td>

</tr>

<tr bgcolor="#D4E4F3">

<td>F1_for_irr</td>

<td>0</td>

</tr>

<tr>

<td>Name</td>

<td>242</td>

</tr>

<tr bgcolor="#D4E4F3">

<td>Name_2</td>

<td>242</td>

</tr>

<tr>

<td>Name_1</td>

<td>242</td>

</tr>

<tr bgcolor="#D4E4F3">

<td>F1_for_i_1</td>

<td>0</td>

</tr>

<tr>

<td>notes</td>

<td></td>

</tr>

<tr bgcolor="#D4E4F3">

<td>new_number</td>

<td>0</td>

</tr>

<tr>

<td>elevation</td>

<td>1284</td>

</tr>

</table>

</td>

</tr>

</table>

</body>

</html>]]></description>
				<styleUrl>#IconStyle09</styleUrl>
				<Point>
					<coordinates>-114.4959773967394,42.47124148470681,0</coordinates>
				</Point>
			</Placemark>
			<Placemark id="ID_00157">
				<name>243</name>
				<Snippet maxLines="0"></Snippet>
				<description><![CDATA[<html xmlns:fo="http://www.w3.org/1999/XSL/Format" xmlns:msxsl="urn:schemas-microsoft-com:xslt">

<head>

<META http-equiv="Content-Type" content="text/html">

<meta http-equiv="content-type" content="text/html; charset=UTF-8">

</head>

<body style="margin:0px 0px 0px 0px;overflow:auto;background:#FFFFFF;">

<table style="font-family:Arial,Verdana,Times;font-size:12px;text-align:left;width:100%;border-collapse:collapse;padding:3px 3px 3px 3px">

<tr style="text-align:center;font-weight:bold;background:#9CBCE2">

<td>243</td>

</tr>

<tr>

<td>

<table style="font-family:Arial,Verdana,Times;font-size:12px;text-align:left;width:100%;border-spacing:0px; padding:3px 3px 3px 3px">

<tr>

<td>FID</td>

<td>157</td>

</tr>

<tr bgcolor="#D4E4F3">

<td>F1_for_irr</td>

<td>1</td>

</tr>

<tr>

<td>Name</td>

<td>243</td>

</tr>

<tr bgcolor="#D4E4F3">

<td>Name_2</td>

<td>243</td>

</tr>

<tr>

<td>Name_1</td>

<td>243</td>

</tr>

<tr bgcolor="#D4E4F3">

<td>F1_for_i_1</td>

<td>1</td>

</tr>

<tr>

<td>notes</td>

<td></td>

</tr>

<tr bgcolor="#D4E4F3">

<td>new_number</td>

<td>1</td>

</tr>

<tr>

<td>elevation</td>

<td>1443</td>

</tr>

</table>

</td>

</tr>

</table>

</body>

</html>]]></description>
				<styleUrl>#IconStyle00</styleUrl>
				<Point>
					<coordinates>-112.4225188703496,42.94574941790137,0</coordinates>
				</Point>
			</Placemark>
			<Placemark id="ID_00158">
				<name>244</name>
				<Snippet maxLines="0"></Snippet>
				<description><![CDATA[<html xmlns:fo="http://www.w3.org/1999/XSL/Format" xmlns:msxsl="urn:schemas-microsoft-com:xslt">

<head>

<META http-equiv="Content-Type" content="text/html">

<meta http-equiv="content-type" content="text/html; charset=UTF-8">

</head>

<body style="margin:0px 0px 0px 0px;overflow:auto;background:#FFFFFF;">

<table style="font-family:Arial,Verdana,Times;font-size:12px;text-align:left;width:100%;border-collapse:collapse;padding:3px 3px 3px 3px">

<tr style="text-align:center;font-weight:bold;background:#9CBCE2">

<td>244</td>

</tr>

<tr>

<td>

<table style="font-family:Arial,Verdana,Times;font-size:12px;text-align:left;width:100%;border-spacing:0px; padding:3px 3px 3px 3px">

<tr>

<td>FID</td>

<td>158</td>

</tr>

<tr bgcolor="#D4E4F3">

<td>F1_for_irr</td>

<td>1</td>

</tr>

<tr>

<td>Name</td>

<td>244</td>

</tr>

<tr bgcolor="#D4E4F3">

<td>Name_2</td>

<td>244</td>

</tr>

<tr>

<td>Name_1</td>

<td>244</td>

</tr>

<tr bgcolor="#D4E4F3">

<td>F1_for_i_1</td>

<td>1</td>

</tr>

<tr>

<td>notes</td>

<td></td>

</tr>

<tr bgcolor="#D4E4F3">

<td>new_number</td>

<td>1</td>

</tr>

<tr>

<td>elevation</td>

<td>1359</td>

</tr>

</table>

</td>

</tr>

</table>

</body>

</html>]]></description>
				<styleUrl>#IconStyle00</styleUrl>
				<Point>
					<coordinates>-112.5114275871134,42.96044948965226,0</coordinates>
				</Point>
			</Placemark>
			<Placemark id="ID_00159">
				<name>245</name>
				<Snippet maxLines="0"></Snippet>
				<description><![CDATA[<html xmlns:fo="http://www.w3.org/1999/XSL/Format" xmlns:msxsl="urn:schemas-microsoft-com:xslt">

<head>

<META http-equiv="Content-Type" content="text/html">

<meta http-equiv="content-type" content="text/html; charset=UTF-8">

</head>

<body style="margin:0px 0px 0px 0px;overflow:auto;background:#FFFFFF;">

<table style="font-family:Arial,Verdana,Times;font-size:12px;text-align:left;width:100%;border-collapse:collapse;padding:3px 3px 3px 3px">

<tr style="text-align:center;font-weight:bold;background:#9CBCE2">

<td>245</td>

</tr>

<tr>

<td>

<table style="font-family:Arial,Verdana,Times;font-size:12px;text-align:left;width:100%;border-spacing:0px; padding:3px 3px 3px 3px">

<tr>

<td>FID</td>

<td>159</td>

</tr>

<tr bgcolor="#D4E4F3">

<td>F1_for_irr</td>

<td>1</td>

</tr>

<tr>

<td>Name</td>

<td>245</td>

</tr>

<tr bgcolor="#D4E4F3">

<td>Name_2</td>

<td>245</td>

</tr>

<tr>

<td>Name_1</td>

<td>245</td>

</tr>

<tr bgcolor="#D4E4F3">

<td>F1_for_i_1</td>

<td>1</td>

</tr>

<tr>

<td>notes</td>

<td></td>

</tr>

<tr bgcolor="#D4E4F3">

<td>new_number</td>

<td>1</td>

</tr>

<tr>

<td>elevation</td>

<td>1352</td>

</tr>

</table>

</td>

</tr>

</table>

</body>

</html>]]></description>
				<styleUrl>#IconStyle00</styleUrl>
				<Point>
					<coordinates>-112.490618829895,43.01768734039848,0</coordinates>
				</Point>
			</Placemark>
			<Placemark id="ID_00160">
				<name>246</name>
				<Snippet maxLines="0"></Snippet>
				<description><![CDATA[<html xmlns:fo="http://www.w3.org/1999/XSL/Format" xmlns:msxsl="urn:schemas-microsoft-com:xslt">

<head>

<META http-equiv="Content-Type" content="text/html">

<meta http-equiv="content-type" content="text/html; charset=UTF-8">

</head>

<body style="margin:0px 0px 0px 0px;overflow:auto;background:#FFFFFF;">

<table style="font-family:Arial,Verdana,Times;font-size:12px;text-align:left;width:100%;border-collapse:collapse;padding:3px 3px 3px 3px">

<tr style="text-align:center;font-weight:bold;background:#9CBCE2">

<td>246</td>

</tr>

<tr>

<td>

<table style="font-family:Arial,Verdana,Times;font-size:12px;text-align:left;width:100%;border-spacing:0px; padding:3px 3px 3px 3px">

<tr>

<td>FID</td>

<td>160</td>

</tr>

<tr bgcolor="#D4E4F3">

<td>F1_for_irr</td>

<td>1</td>

</tr>

<tr>

<td>Name</td>

<td>246</td>

</tr>

<tr bgcolor="#D4E4F3">

<td>Name_2</td>

<td>246</td>

</tr>

<tr>

<td>Name_1</td>

<td>246</td>

</tr>

<tr bgcolor="#D4E4F3">

<td>F1_for_i_1</td>

<td>1</td>

</tr>

<tr>

<td>notes</td>

<td></td>

</tr>

<tr bgcolor="#D4E4F3">

<td>new_number</td>

<td>1</td>

</tr>

<tr>

<td>elevation</td>

<td>1357</td>

</tr>

</table>

</td>

</tr>

</table>

</body>

</html>]]></description>
				<styleUrl>#IconStyle00</styleUrl>
				<Point>
					<coordinates>-112.4357258040026,43.01923569956796,0</coordinates>
				</Point>
			</Placemark>
			<Placemark id="ID_00161">
				<name>247</name>
				<Snippet maxLines="0"></Snippet>
				<description><![CDATA[<html xmlns:fo="http://www.w3.org/1999/XSL/Format" xmlns:msxsl="urn:schemas-microsoft-com:xslt">

<head>

<META http-equiv="Content-Type" content="text/html">

<meta http-equiv="content-type" content="text/html; charset=UTF-8">

</head>

<body style="margin:0px 0px 0px 0px;overflow:auto;background:#FFFFFF;">

<table style="font-family:Arial,Verdana,Times;font-size:12px;text-align:left;width:100%;border-collapse:collapse;padding:3px 3px 3px 3px">

<tr style="text-align:center;font-weight:bold;background:#9CBCE2">

<td>247</td>

</tr>

<tr>

<td>

<table style="font-family:Arial,Verdana,Times;font-size:12px;text-align:left;width:100%;border-spacing:0px; padding:3px 3px 3px 3px">

<tr>

<td>FID</td>

<td>161</td>

</tr>

<tr bgcolor="#D4E4F3">

<td>F1_for_irr</td>

<td>1</td>

</tr>

<tr>

<td>Name</td>

<td>247</td>

</tr>

<tr bgcolor="#D4E4F3">

<td>Name_2</td>

<td>247</td>

</tr>

<tr>

<td>Name_1</td>

<td>247</td>

</tr>

<tr bgcolor="#D4E4F3">

<td>F1_for_i_1</td>

<td>1</td>

</tr>

<tr>

<td>notes</td>

<td></td>

</tr>

<tr bgcolor="#D4E4F3">

<td>new_number</td>

<td>1</td>

</tr>

<tr>

<td>elevation</td>

<td>1371</td>

</tr>

</table>

</td>

</tr>

</table>

</body>

</html>]]></description>
				<styleUrl>#IconStyle00</styleUrl>
				<Point>
					<coordinates>-112.3814162483611,42.80292789580579,0</coordinates>
				</Point>
			</Placemark>
			<Placemark id="ID_00162">
				<name>249</name>
				<Snippet maxLines="0"></Snippet>
				<description><![CDATA[<html xmlns:fo="http://www.w3.org/1999/XSL/Format" xmlns:msxsl="urn:schemas-microsoft-com:xslt">

<head>

<META http-equiv="Content-Type" content="text/html">

<meta http-equiv="content-type" content="text/html; charset=UTF-8">

</head>

<body style="margin:0px 0px 0px 0px;overflow:auto;background:#FFFFFF;">

<table style="font-family:Arial,Verdana,Times;font-size:12px;text-align:left;width:100%;border-collapse:collapse;padding:3px 3px 3px 3px">

<tr style="text-align:center;font-weight:bold;background:#9CBCE2">

<td>249</td>

</tr>

<tr>

<td>

<table style="font-family:Arial,Verdana,Times;font-size:12px;text-align:left;width:100%;border-spacing:0px; padding:3px 3px 3px 3px">

<tr>

<td>FID</td>

<td>162</td>

</tr>

<tr bgcolor="#D4E4F3">

<td>F1_for_irr</td>

<td>1</td>

</tr>

<tr>

<td>Name</td>

<td>249</td>

</tr>

<tr bgcolor="#D4E4F3">

<td>Name_2</td>

<td>249</td>

</tr>

<tr>

<td>Name_1</td>

<td>249</td>

</tr>

<tr bgcolor="#D4E4F3">

<td>F1_for_i_1</td>

<td>1</td>

</tr>

<tr>

<td>notes</td>

<td></td>

</tr>

<tr bgcolor="#D4E4F3">

<td>new_number</td>

<td>1</td>

</tr>

<tr>

<td>elevation</td>

<td>1491</td>

</tr>

</table>

</td>

</tr>

</table>

</body>

</html>]]></description>
				<styleUrl>#IconStyle00</styleUrl>
				<Point>
					<coordinates>-112.2394937038713,42.49267490472312,0</coordinates>
				</Point>
			</Placemark>
			<Placemark id="ID_00163">
				<name>250</name>
				<Snippet maxLines="0"></Snippet>
				<description><![CDATA[<html xmlns:fo="http://www.w3.org/1999/XSL/Format" xmlns:msxsl="urn:schemas-microsoft-com:xslt">

<head>

<META http-equiv="Content-Type" content="text/html">

<meta http-equiv="content-type" content="text/html; charset=UTF-8">

</head>

<body style="margin:0px 0px 0px 0px;overflow:auto;background:#FFFFFF;">

<table style="font-family:Arial,Verdana,Times;font-size:12px;text-align:left;width:100%;border-collapse:collapse;padding:3px 3px 3px 3px">

<tr style="text-align:center;font-weight:bold;background:#9CBCE2">

<td>250</td>

</tr>

<tr>

<td>

<table style="font-family:Arial,Verdana,Times;font-size:12px;text-align:left;width:100%;border-spacing:0px; padding:3px 3px 3px 3px">

<tr>

<td>FID</td>

<td>163</td>

</tr>

<tr bgcolor="#D4E4F3">

<td>F1_for_irr</td>

<td>1</td>

</tr>

<tr>

<td>Name</td>

<td>250</td>

</tr>

<tr bgcolor="#D4E4F3">

<td>Name_2</td>

<td>250</td>

</tr>

<tr>

<td>Name_1</td>

<td>250</td>

</tr>

<tr bgcolor="#D4E4F3">

<td>F1_for_i_1</td>

<td>1</td>

</tr>

<tr>

<td>notes</td>

<td></td>

</tr>

<tr bgcolor="#D4E4F3">

<td>new_number</td>

<td>1</td>

</tr>

<tr>

<td>elevation</td>

<td>1365</td>

</tr>

</table>

</td>

</tr>

</table>

</body>

</html>]]></description>
				<styleUrl>#IconStyle00</styleUrl>
				<Point>
					<coordinates>-112.4912128267105,42.94229056146031,0</coordinates>
				</Point>
			</Placemark>
			<Placemark id="ID_00164">
				<name>251</name>
				<Snippet maxLines="0"></Snippet>
				<description><![CDATA[<html xmlns:fo="http://www.w3.org/1999/XSL/Format" xmlns:msxsl="urn:schemas-microsoft-com:xslt">

<head>

<META http-equiv="Content-Type" content="text/html">

<meta http-equiv="content-type" content="text/html; charset=UTF-8">

</head>

<body style="margin:0px 0px 0px 0px;overflow:auto;background:#FFFFFF;">

<table style="font-family:Arial,Verdana,Times;font-size:12px;text-align:left;width:100%;border-collapse:collapse;padding:3px 3px 3px 3px">

<tr style="text-align:center;font-weight:bold;background:#9CBCE2">

<td>251</td>

</tr>

<tr>

<td>

<table style="font-family:Arial,Verdana,Times;font-size:12px;text-align:left;width:100%;border-spacing:0px; padding:3px 3px 3px 3px">

<tr>

<td>FID</td>

<td>164</td>

</tr>

<tr bgcolor="#D4E4F3">

<td>F1_for_irr</td>

<td>1</td>

</tr>

<tr>

<td>Name</td>

<td>251</td>

</tr>

<tr bgcolor="#D4E4F3">

<td>Name_2</td>

<td>251</td>

</tr>

<tr>

<td>Name_1</td>

<td>251</td>

</tr>

<tr bgcolor="#D4E4F3">

<td>F1_for_i_1</td>

<td>1</td>

</tr>

<tr>

<td>notes</td>

<td></td>

</tr>

<tr bgcolor="#D4E4F3">

<td>new_number</td>

<td>1</td>

</tr>

<tr>

<td>elevation</td>

<td>1474</td>

</tr>

</table>

</td>

</tr>

</table>

</body>

</html>]]></description>
				<styleUrl>#IconStyle00</styleUrl>
				<Point>
					<coordinates>-112.1549807365717,42.44897934482094,0</coordinates>
				</Point>
			</Placemark>
			<Placemark id="ID_00165">
				<name>252</name>
				<Snippet maxLines="0"></Snippet>
				<description><![CDATA[<html xmlns:fo="http://www.w3.org/1999/XSL/Format" xmlns:msxsl="urn:schemas-microsoft-com:xslt">

<head>

<META http-equiv="Content-Type" content="text/html">

<meta http-equiv="content-type" content="text/html; charset=UTF-8">

</head>

<body style="margin:0px 0px 0px 0px;overflow:auto;background:#FFFFFF;">

<table style="font-family:Arial,Verdana,Times;font-size:12px;text-align:left;width:100%;border-collapse:collapse;padding:3px 3px 3px 3px">

<tr style="text-align:center;font-weight:bold;background:#9CBCE2">

<td>252</td>

</tr>

<tr>

<td>

<table style="font-family:Arial,Verdana,Times;font-size:12px;text-align:left;width:100%;border-spacing:0px; padding:3px 3px 3px 3px">

<tr>

<td>FID</td>

<td>165</td>

</tr>

<tr bgcolor="#D4E4F3">

<td>F1_for_irr</td>

<td>1</td>

</tr>

<tr>

<td>Name</td>

<td>252</td>

</tr>

<tr bgcolor="#D4E4F3">

<td>Name_2</td>

<td>252</td>

</tr>

<tr>

<td>Name_1</td>

<td>252</td>

</tr>

<tr bgcolor="#D4E4F3">

<td>F1_for_i_1</td>

<td>1</td>

</tr>

<tr>

<td>notes</td>

<td></td>

</tr>

<tr bgcolor="#D4E4F3">

<td>new_number</td>

<td>1</td>

</tr>

<tr>

<td>elevation</td>

<td>1362</td>

</tr>

</table>

</td>

</tr>

</table>

</body>

</html>]]></description>
				<styleUrl>#IconStyle00</styleUrl>
				<Point>
					<coordinates>-112.5303346676108,42.93774891947709,0</coordinates>
				</Point>
			</Placemark>
			<Placemark id="ID_00166">
				<name>253</name>
				<Snippet maxLines="0"></Snippet>
				<description><![CDATA[<html xmlns:fo="http://www.w3.org/1999/XSL/Format" xmlns:msxsl="urn:schemas-microsoft-com:xslt">

<head>

<META http-equiv="Content-Type" content="text/html">

<meta http-equiv="content-type" content="text/html; charset=UTF-8">

</head>

<body style="margin:0px 0px 0px 0px;overflow:auto;background:#FFFFFF;">

<table style="font-family:Arial,Verdana,Times;font-size:12px;text-align:left;width:100%;border-collapse:collapse;padding:3px 3px 3px 3px">

<tr style="text-align:center;font-weight:bold;background:#9CBCE2">

<td>253</td>

</tr>

<tr>

<td>

<table style="font-family:Arial,Verdana,Times;font-size:12px;text-align:left;width:100%;border-spacing:0px; padding:3px 3px 3px 3px">

<tr>

<td>FID</td>

<td>166</td>

</tr>

<tr bgcolor="#D4E4F3">

<td>F1_for_irr</td>

<td>0</td>

</tr>

<tr>

<td>Name</td>

<td>253</td>

</tr>

<tr bgcolor="#D4E4F3">

<td>Name_2</td>

<td>253</td>

</tr>

<tr>

<td>Name_1</td>

<td>253</td>

</tr>

<tr bgcolor="#D4E4F3">

<td>F1_for_i_1</td>

<td>0</td>

</tr>

<tr>

<td>notes</td>

<td>wheat</td>

</tr>

<tr bgcolor="#D4E4F3">

<td>new_number</td>

<td>2</td>

</tr>

<tr>

<td>elevation</td>

<td>1560</td>

</tr>

</table>

</td>

</tr>

</table>

</body>

</html>]]></description>
				<styleUrl>#IconStyle09</styleUrl>
				<Point>
					<coordinates>-112.2770906633035,42.96988697880107,0</coordinates>
				</Point>
			</Placemark>
			<Placemark id="ID_00167">
				<name>254</name>
				<Snippet maxLines="0"></Snippet>
				<description><![CDATA[<html xmlns:fo="http://www.w3.org/1999/XSL/Format" xmlns:msxsl="urn:schemas-microsoft-com:xslt">

<head>

<META http-equiv="Content-Type" content="text/html">

<meta http-equiv="content-type" content="text/html; charset=UTF-8">

</head>

<body style="margin:0px 0px 0px 0px;overflow:auto;background:#FFFFFF;">

<table style="font-family:Arial,Verdana,Times;font-size:12px;text-align:left;width:100%;border-collapse:collapse;padding:3px 3px 3px 3px">

<tr style="text-align:center;font-weight:bold;background:#9CBCE2">

<td>254</td>

</tr>

<tr>

<td>

<table style="font-family:Arial,Verdana,Times;font-size:12px;text-align:left;width:100%;border-spacing:0px; padding:3px 3px 3px 3px">

<tr>

<td>FID</td>

<td>167</td>

</tr>

<tr bgcolor="#D4E4F3">

<td>F1_for_irr</td>

<td>0</td>

</tr>

<tr>

<td>Name</td>

<td>254</td>

</tr>

<tr bgcolor="#D4E4F3">

<td>Name_2</td>

<td>254</td>

</tr>

<tr>

<td>Name_1</td>

<td>254</td>

</tr>

<tr bgcolor="#D4E4F3">

<td>F1_for_i_1</td>

<td>0</td>

</tr>

<tr>

<td>notes</td>

<td></td>

</tr>

<tr bgcolor="#D4E4F3">

<td>new_number</td>

<td>0</td>

</tr>

<tr>

<td>elevation</td>

<td>1443</td>

</tr>

</table>

</td>

</tr>

</table>

</body>

</html>]]></description>
				<styleUrl>#IconStyle09</styleUrl>
				<Point>
					<coordinates>-112.4126062711625,42.98127965343332,0</coordinates>
				</Point>
			</Placemark>
			<Placemark id="ID_00168">
				<name>255</name>
				<Snippet maxLines="0"></Snippet>
				<description><![CDATA[<html xmlns:fo="http://www.w3.org/1999/XSL/Format" xmlns:msxsl="urn:schemas-microsoft-com:xslt">

<head>

<META http-equiv="Content-Type" content="text/html">

<meta http-equiv="content-type" content="text/html; charset=UTF-8">

</head>

<body style="margin:0px 0px 0px 0px;overflow:auto;background:#FFFFFF;">

<table style="font-family:Arial,Verdana,Times;font-size:12px;text-align:left;width:100%;border-collapse:collapse;padding:3px 3px 3px 3px">

<tr style="text-align:center;font-weight:bold;background:#9CBCE2">

<td>255</td>

</tr>

<tr>

<td>

<table style="font-family:Arial,Verdana,Times;font-size:12px;text-align:left;width:100%;border-spacing:0px; padding:3px 3px 3px 3px">

<tr>

<td>FID</td>

<td>168</td>

</tr>

<tr bgcolor="#D4E4F3">

<td>F1_for_irr</td>

<td>0</td>

</tr>

<tr>

<td>Name</td>

<td>255</td>

</tr>

<tr bgcolor="#D4E4F3">

<td>Name_2</td>

<td>255</td>

</tr>

<tr>

<td>Name_1</td>

<td>255</td>

</tr>

<tr bgcolor="#D4E4F3">

<td>F1_for_i_1</td>

<td>0</td>

</tr>

<tr>

<td>notes</td>

<td>wheat</td>

</tr>

<tr bgcolor="#D4E4F3">

<td>new_number</td>

<td>2</td>

</tr>

<tr>

<td>elevation</td>

<td>1704</td>

</tr>

</table>

</td>

</tr>

</table>

</body>

</html>]]></description>
				<styleUrl>#IconStyle09</styleUrl>
				<Point>
					<coordinates>-112.310493057009,42.95368762658274,0</coordinates>
				</Point>
			</Placemark>
			<Placemark id="ID_00169">
				<name>256</name>
				<Snippet maxLines="0"></Snippet>
				<description><![CDATA[<html xmlns:fo="http://www.w3.org/1999/XSL/Format" xmlns:msxsl="urn:schemas-microsoft-com:xslt">

<head>

<META http-equiv="Content-Type" content="text/html">

<meta http-equiv="content-type" content="text/html; charset=UTF-8">

</head>

<body style="margin:0px 0px 0px 0px;overflow:auto;background:#FFFFFF;">

<table style="font-family:Arial,Verdana,Times;font-size:12px;text-align:left;width:100%;border-collapse:collapse;padding:3px 3px 3px 3px">

<tr style="text-align:center;font-weight:bold;background:#9CBCE2">

<td>256</td>

</tr>

<tr>

<td>

<table style="font-family:Arial,Verdana,Times;font-size:12px;text-align:left;width:100%;border-spacing:0px; padding:3px 3px 3px 3px">

<tr>

<td>FID</td>

<td>169</td>

</tr>

<tr bgcolor="#D4E4F3">

<td>F1_for_irr</td>

<td>0</td>

</tr>

<tr>

<td>Name</td>

<td>256</td>

</tr>

<tr bgcolor="#D4E4F3">

<td>Name_2</td>

<td>256</td>

</tr>

<tr>

<td>Name_1</td>

<td>256</td>

</tr>

<tr bgcolor="#D4E4F3">

<td>F1_for_i_1</td>

<td>0</td>

</tr>

<tr>

<td>notes</td>

<td>wheat</td>

</tr>

<tr bgcolor="#D4E4F3">

<td>new_number</td>

<td>2</td>

</tr>

<tr>

<td>elevation</td>

<td>1436</td>

</tr>

</table>

</td>

</tr>

</table>

</body>

</html>]]></description>
				<styleUrl>#IconStyle09</styleUrl>
				<Point>
					<coordinates>-112.4836498340725,42.86719697905738,0</coordinates>
				</Point>
			</Placemark>
			<Placemark id="ID_00170">
				<name>257</name>
				<Snippet maxLines="0"></Snippet>
				<description><![CDATA[<html xmlns:fo="http://www.w3.org/1999/XSL/Format" xmlns:msxsl="urn:schemas-microsoft-com:xslt">

<head>

<META http-equiv="Content-Type" content="text/html">

<meta http-equiv="content-type" content="text/html; charset=UTF-8">

</head>

<body style="margin:0px 0px 0px 0px;overflow:auto;background:#FFFFFF;">

<table style="font-family:Arial,Verdana,Times;font-size:12px;text-align:left;width:100%;border-collapse:collapse;padding:3px 3px 3px 3px">

<tr style="text-align:center;font-weight:bold;background:#9CBCE2">

<td>257</td>

</tr>

<tr>

<td>

<table style="font-family:Arial,Verdana,Times;font-size:12px;text-align:left;width:100%;border-spacing:0px; padding:3px 3px 3px 3px">

<tr>

<td>FID</td>

<td>170</td>

</tr>

<tr bgcolor="#D4E4F3">

<td>F1_for_irr</td>

<td>0</td>

</tr>

<tr>

<td>Name</td>

<td>257</td>

</tr>

<tr bgcolor="#D4E4F3">

<td>Name_2</td>

<td>257</td>

</tr>

<tr>

<td>Name_1</td>

<td>257</td>

</tr>

<tr bgcolor="#D4E4F3">

<td>F1_for_i_1</td>

<td>0</td>

</tr>

<tr>

<td>notes</td>

<td>wheat</td>

</tr>

<tr bgcolor="#D4E4F3">

<td>new_number</td>

<td>2</td>

</tr>

<tr>

<td>elevation</td>

<td>1649</td>

</tr>

</table>

</td>

</tr>

</table>

</body>

</html>]]></description>
				<styleUrl>#IconStyle09</styleUrl>
				<Point>
					<coordinates>-112.3363786436594,42.53995527201823,0</coordinates>
				</Point>
			</Placemark>
			<Placemark id="ID_00171">
				<name>258</name>
				<Snippet maxLines="0"></Snippet>
				<description><![CDATA[<html xmlns:fo="http://www.w3.org/1999/XSL/Format" xmlns:msxsl="urn:schemas-microsoft-com:xslt">

<head>

<META http-equiv="Content-Type" content="text/html">

<meta http-equiv="content-type" content="text/html; charset=UTF-8">

</head>

<body style="margin:0px 0px 0px 0px;overflow:auto;background:#FFFFFF;">

<table style="font-family:Arial,Verdana,Times;font-size:12px;text-align:left;width:100%;border-collapse:collapse;padding:3px 3px 3px 3px">

<tr style="text-align:center;font-weight:bold;background:#9CBCE2">

<td>258</td>

</tr>

<tr>

<td>

<table style="font-family:Arial,Verdana,Times;font-size:12px;text-align:left;width:100%;border-spacing:0px; padding:3px 3px 3px 3px">

<tr>

<td>FID</td>

<td>171</td>

</tr>

<tr bgcolor="#D4E4F3">

<td>F1_for_irr</td>

<td>0</td>

</tr>

<tr>

<td>Name</td>

<td>258</td>

</tr>

<tr bgcolor="#D4E4F3">

<td>Name_2</td>

<td>258</td>

</tr>

<tr>

<td>Name_1</td>

<td>258</td>

</tr>

<tr bgcolor="#D4E4F3">

<td>F1_for_i_1</td>

<td>0</td>

</tr>

<tr>

<td>notes</td>

<td>wheat</td>

</tr>

<tr bgcolor="#D4E4F3">

<td>new_number</td>

<td>2</td>

</tr>

<tr>

<td>elevation</td>

<td>1581</td>

</tr>

</table>

</td>

</tr>

</table>

</body>

</html>]]></description>
				<styleUrl>#IconStyle09</styleUrl>
				<Point>
					<coordinates>-112.0470509502411,42.39015416278443,0</coordinates>
				</Point>
			</Placemark>
			<Placemark id="ID_00172">
				<name>259</name>
				<Snippet maxLines="0"></Snippet>
				<description><![CDATA[<html xmlns:fo="http://www.w3.org/1999/XSL/Format" xmlns:msxsl="urn:schemas-microsoft-com:xslt">

<head>

<META http-equiv="Content-Type" content="text/html">

<meta http-equiv="content-type" content="text/html; charset=UTF-8">

</head>

<body style="margin:0px 0px 0px 0px;overflow:auto;background:#FFFFFF;">

<table style="font-family:Arial,Verdana,Times;font-size:12px;text-align:left;width:100%;border-collapse:collapse;padding:3px 3px 3px 3px">

<tr style="text-align:center;font-weight:bold;background:#9CBCE2">

<td>259</td>

</tr>

<tr>

<td>

<table style="font-family:Arial,Verdana,Times;font-size:12px;text-align:left;width:100%;border-spacing:0px; padding:3px 3px 3px 3px">

<tr>

<td>FID</td>

<td>172</td>

</tr>

<tr bgcolor="#D4E4F3">

<td>F1_for_irr</td>

<td>0</td>

</tr>

<tr>

<td>Name</td>

<td>259</td>

</tr>

<tr bgcolor="#D4E4F3">

<td>Name_2</td>

<td>259</td>

</tr>

<tr>

<td>Name_1</td>

<td>259</td>

</tr>

<tr bgcolor="#D4E4F3">

<td>F1_for_i_1</td>

<td>0</td>

</tr>

<tr>

<td>notes</td>

<td>wheat</td>

</tr>

<tr bgcolor="#D4E4F3">

<td>new_number</td>

<td>2</td>

</tr>

<tr>

<td>elevation</td>

<td>1582</td>

</tr>

</table>

</td>

</tr>

</table>

</body>

</html>]]></description>
				<styleUrl>#IconStyle09</styleUrl>
				<Point>
					<coordinates>-111.9799617585283,42.33688259655463,0</coordinates>
				</Point>
			</Placemark>
			<Placemark id="ID_00173">
				<name>260</name>
				<Snippet maxLines="0"></Snippet>
				<description><![CDATA[<html xmlns:fo="http://www.w3.org/1999/XSL/Format" xmlns:msxsl="urn:schemas-microsoft-com:xslt">

<head>

<META http-equiv="Content-Type" content="text/html">

<meta http-equiv="content-type" content="text/html; charset=UTF-8">

</head>

<body style="margin:0px 0px 0px 0px;overflow:auto;background:#FFFFFF;">

<table style="font-family:Arial,Verdana,Times;font-size:12px;text-align:left;width:100%;border-collapse:collapse;padding:3px 3px 3px 3px">

<tr style="text-align:center;font-weight:bold;background:#9CBCE2">

<td>260</td>

</tr>

<tr>

<td>

<table style="font-family:Arial,Verdana,Times;font-size:12px;text-align:left;width:100%;border-spacing:0px; padding:3px 3px 3px 3px">

<tr>

<td>FID</td>

<td>173</td>

</tr>

<tr bgcolor="#D4E4F3">

<td>F1_for_irr</td>

<td>0</td>

</tr>

<tr>

<td>Name</td>

<td>260</td>

</tr>

<tr bgcolor="#D4E4F3">

<td>Name_2</td>

<td>260</td>

</tr>

<tr>

<td>Name_1</td>

<td>260</td>

</tr>

<tr bgcolor="#D4E4F3">

<td>F1_for_i_1</td>

<td>0</td>

</tr>

<tr>

<td>notes</td>

<td>wheatish</td>

</tr>

<tr bgcolor="#D4E4F3">

<td>new_number</td>

<td>2</td>

</tr>

<tr>

<td>elevation</td>

<td>1604</td>

</tr>

</table>

</td>

</tr>

</table>

</body>

</html>]]></description>
				<styleUrl>#IconStyle09</styleUrl>
				<Point>
					<coordinates>-112.2723434839646,42.74687342336983,0</coordinates>
				</Point>
			</Placemark>
			<Placemark id="ID_00174">
				<name>261</name>
				<Snippet maxLines="0"></Snippet>
				<description><![CDATA[<html xmlns:fo="http://www.w3.org/1999/XSL/Format" xmlns:msxsl="urn:schemas-microsoft-com:xslt">

<head>

<META http-equiv="Content-Type" content="text/html">

<meta http-equiv="content-type" content="text/html; charset=UTF-8">

</head>

<body style="margin:0px 0px 0px 0px;overflow:auto;background:#FFFFFF;">

<table style="font-family:Arial,Verdana,Times;font-size:12px;text-align:left;width:100%;border-collapse:collapse;padding:3px 3px 3px 3px">

<tr style="text-align:center;font-weight:bold;background:#9CBCE2">

<td>261</td>

</tr>

<tr>

<td>

<table style="font-family:Arial,Verdana,Times;font-size:12px;text-align:left;width:100%;border-spacing:0px; padding:3px 3px 3px 3px">

<tr>

<td>FID</td>

<td>174</td>

</tr>

<tr bgcolor="#D4E4F3">

<td>F1_for_irr</td>

<td>0</td>

</tr>

<tr>

<td>Name</td>

<td>261</td>

</tr>

<tr bgcolor="#D4E4F3">

<td>Name_2</td>

<td>261</td>

</tr>

<tr>

<td>Name_1</td>

<td>261</td>

</tr>

<tr bgcolor="#D4E4F3">

<td>F1_for_i_1</td>

<td>0</td>

</tr>

<tr>

<td>notes</td>

<td>wheat</td>

</tr>

<tr bgcolor="#D4E4F3">

<td>new_number</td>

<td>2</td>

</tr>

<tr>

<td>elevation</td>

<td>1672</td>

</tr>

</table>

</td>

</tr>

</table>

</body>

</html>]]></description>
				<styleUrl>#IconStyle09</styleUrl>
				<Point>
					<coordinates>-112.2981003929187,42.54392554412863,0</coordinates>
				</Point>
			</Placemark>
			<Placemark id="ID_00175">
				<name>264</name>
				<Snippet maxLines="0"></Snippet>
				<description><![CDATA[<html xmlns:fo="http://www.w3.org/1999/XSL/Format" xmlns:msxsl="urn:schemas-microsoft-com:xslt">

<head>

<META http-equiv="Content-Type" content="text/html">

<meta http-equiv="content-type" content="text/html; charset=UTF-8">

</head>

<body style="margin:0px 0px 0px 0px;overflow:auto;background:#FFFFFF;">

<table style="font-family:Arial,Verdana,Times;font-size:12px;text-align:left;width:100%;border-collapse:collapse;padding:3px 3px 3px 3px">

<tr style="text-align:center;font-weight:bold;background:#9CBCE2">

<td>264</td>

</tr>

<tr>

<td>

<table style="font-family:Arial,Verdana,Times;font-size:12px;text-align:left;width:100%;border-spacing:0px; padding:3px 3px 3px 3px">

<tr>

<td>FID</td>

<td>175</td>

</tr>

<tr bgcolor="#D4E4F3">

<td>F1_for_irr</td>

<td>1</td>

</tr>

<tr>

<td>Name</td>

<td>264</td>

</tr>

<tr bgcolor="#D4E4F3">

<td>Name_2</td>

<td>264</td>

</tr>

<tr>

<td>Name_1</td>

<td>264</td>

</tr>

<tr bgcolor="#D4E4F3">

<td>F1_for_i_1</td>

<td>1</td>

</tr>

<tr>

<td>notes</td>

<td></td>

</tr>

<tr bgcolor="#D4E4F3">

<td>new_number</td>

<td>1</td>

</tr>

<tr>

<td>elevation</td>

<td>1411</td>

</tr>

</table>

</td>

</tr>

</table>

</body>

</html>]]></description>
				<styleUrl>#IconStyle00</styleUrl>
				<Point>
					<coordinates>-112.2024030609525,43.35950092892477,0</coordinates>
				</Point>
			</Placemark>
			<Placemark id="ID_00176">
				<name>265</name>
				<Snippet maxLines="0"></Snippet>
				<description><![CDATA[<html xmlns:fo="http://www.w3.org/1999/XSL/Format" xmlns:msxsl="urn:schemas-microsoft-com:xslt">

<head>

<META http-equiv="Content-Type" content="text/html">

<meta http-equiv="content-type" content="text/html; charset=UTF-8">

</head>

<body style="margin:0px 0px 0px 0px;overflow:auto;background:#FFFFFF;">

<table style="font-family:Arial,Verdana,Times;font-size:12px;text-align:left;width:100%;border-collapse:collapse;padding:3px 3px 3px 3px">

<tr style="text-align:center;font-weight:bold;background:#9CBCE2">

<td>265</td>

</tr>

<tr>

<td>

<table style="font-family:Arial,Verdana,Times;font-size:12px;text-align:left;width:100%;border-spacing:0px; padding:3px 3px 3px 3px">

<tr>

<td>FID</td>

<td>176</td>

</tr>

<tr bgcolor="#D4E4F3">

<td>F1_for_irr</td>

<td>1</td>

</tr>

<tr>

<td>Name</td>

<td>265</td>

</tr>

<tr bgcolor="#D4E4F3">

<td>Name_2</td>

<td>265</td>

</tr>

<tr>

<td>Name_1</td>

<td>265</td>

</tr>

<tr bgcolor="#D4E4F3">

<td>F1_for_i_1</td>

<td>1</td>

</tr>

<tr>

<td>notes</td>

<td></td>

</tr>

<tr bgcolor="#D4E4F3">

<td>new_number</td>

<td>1</td>

</tr>

<tr>

<td>elevation</td>

<td>1407</td>

</tr>

</table>

</td>

</tr>

</table>

</body>

</html>]]></description>
				<styleUrl>#IconStyle00</styleUrl>
				<Point>
					<coordinates>-112.105539686907,43.34381116765132,0</coordinates>
				</Point>
			</Placemark>
			<Placemark id="ID_00177">
				<name>266</name>
				<Snippet maxLines="0"></Snippet>
				<description><![CDATA[<html xmlns:fo="http://www.w3.org/1999/XSL/Format" xmlns:msxsl="urn:schemas-microsoft-com:xslt">

<head>

<META http-equiv="Content-Type" content="text/html">

<meta http-equiv="content-type" content="text/html; charset=UTF-8">

</head>

<body style="margin:0px 0px 0px 0px;overflow:auto;background:#FFFFFF;">

<table style="font-family:Arial,Verdana,Times;font-size:12px;text-align:left;width:100%;border-collapse:collapse;padding:3px 3px 3px 3px">

<tr style="text-align:center;font-weight:bold;background:#9CBCE2">

<td>266</td>

</tr>

<tr>

<td>

<table style="font-family:Arial,Verdana,Times;font-size:12px;text-align:left;width:100%;border-spacing:0px; padding:3px 3px 3px 3px">

<tr>

<td>FID</td>

<td>177</td>

</tr>

<tr bgcolor="#D4E4F3">

<td>F1_for_irr</td>

<td>1</td>

</tr>

<tr>

<td>Name</td>

<td>266</td>

</tr>

<tr bgcolor="#D4E4F3">

<td>Name_2</td>

<td>266</td>

</tr>

<tr>

<td>Name_1</td>

<td>266</td>

</tr>

<tr bgcolor="#D4E4F3">

<td>F1_for_i_1</td>

<td>1</td>

</tr>

<tr>

<td>notes</td>

<td></td>

</tr>

<tr bgcolor="#D4E4F3">

<td>new_number</td>

<td>1</td>

</tr>

<tr>

<td>elevation</td>

<td>1388</td>

</tr>

</table>

</td>

</tr>

</table>

</body>

</html>]]></description>
				<styleUrl>#IconStyle00</styleUrl>
				<Point>
					<coordinates>-112.2010142550038,43.22324128585672,0</coordinates>
				</Point>
			</Placemark>
			<Placemark id="ID_00178">
				<name>267</name>
				<Snippet maxLines="0"></Snippet>
				<description><![CDATA[<html xmlns:fo="http://www.w3.org/1999/XSL/Format" xmlns:msxsl="urn:schemas-microsoft-com:xslt">

<head>

<META http-equiv="Content-Type" content="text/html">

<meta http-equiv="content-type" content="text/html; charset=UTF-8">

</head>

<body style="margin:0px 0px 0px 0px;overflow:auto;background:#FFFFFF;">

<table style="font-family:Arial,Verdana,Times;font-size:12px;text-align:left;width:100%;border-collapse:collapse;padding:3px 3px 3px 3px">

<tr style="text-align:center;font-weight:bold;background:#9CBCE2">

<td>267</td>

</tr>

<tr>

<td>

<table style="font-family:Arial,Verdana,Times;font-size:12px;text-align:left;width:100%;border-spacing:0px; padding:3px 3px 3px 3px">

<tr>

<td>FID</td>

<td>178</td>

</tr>

<tr bgcolor="#D4E4F3">

<td>F1_for_irr</td>

<td>1</td>

</tr>

<tr>

<td>Name</td>

<td>267</td>

</tr>

<tr bgcolor="#D4E4F3">

<td>Name_2</td>

<td>267</td>

</tr>

<tr>

<td>Name_1</td>

<td>267</td>

</tr>

<tr bgcolor="#D4E4F3">

<td>F1_for_i_1</td>

<td>1</td>

</tr>

<tr>

<td>notes</td>

<td></td>

</tr>

<tr bgcolor="#D4E4F3">

<td>new_number</td>

<td>1</td>

</tr>

<tr>

<td>elevation</td>

<td>1456</td>

</tr>

</table>

</td>

</tr>

</table>

</body>

</html>]]></description>
				<styleUrl>#IconStyle00</styleUrl>
				<Point>
					<coordinates>-112.1157894617143,43.27221589045104,0</coordinates>
				</Point>
			</Placemark>
			<Placemark id="ID_00179">
				<name>268</name>
				<Snippet maxLines="0"></Snippet>
				<description><![CDATA[<html xmlns:fo="http://www.w3.org/1999/XSL/Format" xmlns:msxsl="urn:schemas-microsoft-com:xslt">

<head>

<META http-equiv="Content-Type" content="text/html">

<meta http-equiv="content-type" content="text/html; charset=UTF-8">

</head>

<body style="margin:0px 0px 0px 0px;overflow:auto;background:#FFFFFF;">

<table style="font-family:Arial,Verdana,Times;font-size:12px;text-align:left;width:100%;border-collapse:collapse;padding:3px 3px 3px 3px">

<tr style="text-align:center;font-weight:bold;background:#9CBCE2">

<td>268</td>

</tr>

<tr>

<td>

<table style="font-family:Arial,Verdana,Times;font-size:12px;text-align:left;width:100%;border-spacing:0px; padding:3px 3px 3px 3px">

<tr>

<td>FID</td>

<td>179</td>

</tr>

<tr bgcolor="#D4E4F3">

<td>F1_for_irr</td>

<td>1</td>

</tr>

<tr>

<td>Name</td>

<td>268</td>

</tr>

<tr bgcolor="#D4E4F3">

<td>Name_2</td>

<td>268</td>

</tr>

<tr>

<td>Name_1</td>

<td>268</td>

</tr>

<tr bgcolor="#D4E4F3">

<td>F1_for_i_1</td>

<td>1</td>

</tr>

<tr>

<td>notes</td>

<td></td>

</tr>

<tr bgcolor="#D4E4F3">

<td>new_number</td>

<td>1</td>

</tr>

<tr>

<td>elevation</td>

<td>1483</td>

</tr>

</table>

</td>

</tr>

</table>

</body>

</html>]]></description>
				<styleUrl>#IconStyle00</styleUrl>
				<Point>
					<coordinates>-112.371721144815,43.40729916182693,0</coordinates>
				</Point>
			</Placemark>
			<Placemark id="ID_00180">
				<name>269</name>
				<Snippet maxLines="0"></Snippet>
				<description><![CDATA[<html xmlns:fo="http://www.w3.org/1999/XSL/Format" xmlns:msxsl="urn:schemas-microsoft-com:xslt">

<head>

<META http-equiv="Content-Type" content="text/html">

<meta http-equiv="content-type" content="text/html; charset=UTF-8">

</head>

<body style="margin:0px 0px 0px 0px;overflow:auto;background:#FFFFFF;">

<table style="font-family:Arial,Verdana,Times;font-size:12px;text-align:left;width:100%;border-collapse:collapse;padding:3px 3px 3px 3px">

<tr style="text-align:center;font-weight:bold;background:#9CBCE2">

<td>269</td>

</tr>

<tr>

<td>

<table style="font-family:Arial,Verdana,Times;font-size:12px;text-align:left;width:100%;border-spacing:0px; padding:3px 3px 3px 3px">

<tr>

<td>FID</td>

<td>180</td>

</tr>

<tr bgcolor="#D4E4F3">

<td>F1_for_irr</td>

<td>1</td>

</tr>

<tr>

<td>Name</td>

<td>269</td>

</tr>

<tr bgcolor="#D4E4F3">

<td>Name_2</td>

<td>269</td>

</tr>

<tr>

<td>Name_1</td>

<td>269</td>

</tr>

<tr bgcolor="#D4E4F3">

<td>F1_for_i_1</td>

<td>1</td>

</tr>

<tr>

<td>notes</td>

<td></td>

</tr>

<tr bgcolor="#D4E4F3">

<td>new_number</td>

<td>1</td>

</tr>

<tr>

<td>elevation</td>

<td>1418</td>

</tr>

</table>

</td>

</tr>

</table>

</body>

</html>]]></description>
				<styleUrl>#IconStyle00</styleUrl>
				<Point>
					<coordinates>-112.6873500159904,43.27785370078772,0</coordinates>
				</Point>
			</Placemark>
			<Placemark id="ID_00181">
				<name>270</name>
				<Snippet maxLines="0"></Snippet>
				<description><![CDATA[<html xmlns:fo="http://www.w3.org/1999/XSL/Format" xmlns:msxsl="urn:schemas-microsoft-com:xslt">

<head>

<META http-equiv="Content-Type" content="text/html">

<meta http-equiv="content-type" content="text/html; charset=UTF-8">

</head>

<body style="margin:0px 0px 0px 0px;overflow:auto;background:#FFFFFF;">

<table style="font-family:Arial,Verdana,Times;font-size:12px;text-align:left;width:100%;border-collapse:collapse;padding:3px 3px 3px 3px">

<tr style="text-align:center;font-weight:bold;background:#9CBCE2">

<td>270</td>

</tr>

<tr>

<td>

<table style="font-family:Arial,Verdana,Times;font-size:12px;text-align:left;width:100%;border-spacing:0px; padding:3px 3px 3px 3px">

<tr>

<td>FID</td>

<td>181</td>

</tr>

<tr bgcolor="#D4E4F3">

<td>F1_for_irr</td>

<td>1</td>

</tr>

<tr>

<td>Name</td>

<td>270</td>

</tr>

<tr bgcolor="#D4E4F3">

<td>Name_2</td>

<td>270</td>

</tr>

<tr>

<td>Name_1</td>

<td>270</td>

</tr>

<tr bgcolor="#D4E4F3">

<td>F1_for_i_1</td>

<td>1</td>

</tr>

<tr>

<td>notes</td>

<td></td>

</tr>

<tr bgcolor="#D4E4F3">

<td>new_number</td>

<td>1</td>

</tr>

<tr>

<td>elevation</td>

<td>1377</td>

</tr>

</table>

</td>

</tr>

</table>

</body>

</html>]]></description>
				<styleUrl>#IconStyle00</styleUrl>
				<Point>
					<coordinates>-112.8829347265564,43.0136057807822,0</coordinates>
				</Point>
			</Placemark>
			<Placemark id="ID_00182">
				<name>271</name>
				<Snippet maxLines="0"></Snippet>
				<description><![CDATA[<html xmlns:fo="http://www.w3.org/1999/XSL/Format" xmlns:msxsl="urn:schemas-microsoft-com:xslt">

<head>

<META http-equiv="Content-Type" content="text/html">

<meta http-equiv="content-type" content="text/html; charset=UTF-8">

</head>

<body style="margin:0px 0px 0px 0px;overflow:auto;background:#FFFFFF;">

<table style="font-family:Arial,Verdana,Times;font-size:12px;text-align:left;width:100%;border-collapse:collapse;padding:3px 3px 3px 3px">

<tr style="text-align:center;font-weight:bold;background:#9CBCE2">

<td>271</td>

</tr>

<tr>

<td>

<table style="font-family:Arial,Verdana,Times;font-size:12px;text-align:left;width:100%;border-spacing:0px; padding:3px 3px 3px 3px">

<tr>

<td>FID</td>

<td>182</td>

</tr>

<tr bgcolor="#D4E4F3">

<td>F1_for_irr</td>

<td>1</td>

</tr>

<tr>

<td>Name</td>

<td>271</td>

</tr>

<tr bgcolor="#D4E4F3">

<td>Name_2</td>

<td>271</td>

</tr>

<tr>

<td>Name_1</td>

<td>271</td>

</tr>

<tr bgcolor="#D4E4F3">

<td>F1_for_i_1</td>

<td>1</td>

</tr>

<tr>

<td>notes</td>

<td></td>

</tr>

<tr bgcolor="#D4E4F3">

<td>new_number</td>

<td>1</td>

</tr>

<tr>

<td>elevation</td>

<td>1433</td>

</tr>

</table>

</td>

</tr>

</table>

</body>

</html>]]></description>
				<styleUrl>#IconStyle00</styleUrl>
				<Point>
					<coordinates>-112.295476304288,43.05881088691297,0</coordinates>
				</Point>
			</Placemark>
			<Placemark id="ID_00183">
				<name>272</name>
				<Snippet maxLines="0"></Snippet>
				<description><![CDATA[<html xmlns:fo="http://www.w3.org/1999/XSL/Format" xmlns:msxsl="urn:schemas-microsoft-com:xslt">

<head>

<META http-equiv="Content-Type" content="text/html">

<meta http-equiv="content-type" content="text/html; charset=UTF-8">

</head>

<body style="margin:0px 0px 0px 0px;overflow:auto;background:#FFFFFF;">

<table style="font-family:Arial,Verdana,Times;font-size:12px;text-align:left;width:100%;border-collapse:collapse;padding:3px 3px 3px 3px">

<tr style="text-align:center;font-weight:bold;background:#9CBCE2">

<td>272</td>

</tr>

<tr>

<td>

<table style="font-family:Arial,Verdana,Times;font-size:12px;text-align:left;width:100%;border-spacing:0px; padding:3px 3px 3px 3px">

<tr>

<td>FID</td>

<td>183</td>

</tr>

<tr bgcolor="#D4E4F3">

<td>F1_for_irr</td>

<td>1</td>

</tr>

<tr>

<td>Name</td>

<td>272</td>

</tr>

<tr bgcolor="#D4E4F3">

<td>Name_2</td>

<td>272</td>

</tr>

<tr>

<td>Name_1</td>

<td>272</td>

</tr>

<tr bgcolor="#D4E4F3">

<td>F1_for_i_1</td>

<td>1</td>

</tr>

<tr>

<td>notes</td>

<td></td>

</tr>

<tr bgcolor="#D4E4F3">

<td>new_number</td>

<td>1</td>

</tr>

<tr>

<td>elevation</td>

<td>1377</td>

</tr>

</table>

</td>

</tr>

</table>

</body>

</html>]]></description>
				<styleUrl>#IconStyle00</styleUrl>
				<Point>
					<coordinates>-112.315734000124,43.18592474313243,0</coordinates>
				</Point>
			</Placemark>
			<Placemark id="ID_00184">
				<name>273</name>
				<Snippet maxLines="0"></Snippet>
				<description><![CDATA[<html xmlns:fo="http://www.w3.org/1999/XSL/Format" xmlns:msxsl="urn:schemas-microsoft-com:xslt">

<head>

<META http-equiv="Content-Type" content="text/html">

<meta http-equiv="content-type" content="text/html; charset=UTF-8">

</head>

<body style="margin:0px 0px 0px 0px;overflow:auto;background:#FFFFFF;">

<table style="font-family:Arial,Verdana,Times;font-size:12px;text-align:left;width:100%;border-collapse:collapse;padding:3px 3px 3px 3px">

<tr style="text-align:center;font-weight:bold;background:#9CBCE2">

<td>273</td>

</tr>

<tr>

<td>

<table style="font-family:Arial,Verdana,Times;font-size:12px;text-align:left;width:100%;border-spacing:0px; padding:3px 3px 3px 3px">

<tr>

<td>FID</td>

<td>184</td>

</tr>

<tr bgcolor="#D4E4F3">

<td>F1_for_irr</td>

<td>0</td>

</tr>

<tr>

<td>Name</td>

<td>273</td>

</tr>

<tr bgcolor="#D4E4F3">

<td>Name_2</td>

<td>273</td>

</tr>

<tr>

<td>Name_1</td>

<td>273</td>

</tr>

<tr bgcolor="#D4E4F3">

<td>F1_for_i_1</td>

<td>0</td>

</tr>

<tr>

<td>notes</td>

<td>wheat</td>

</tr>

<tr bgcolor="#D4E4F3">

<td>new_number</td>

<td>2</td>

</tr>

<tr>

<td>elevation</td>

<td>1468</td>

</tr>

</table>

</td>

</tr>

</table>

</body>

</html>]]></description>
				<styleUrl>#IconStyle09</styleUrl>
				<Point>
					<coordinates>-112.1415669840291,43.23252145570069,0</coordinates>
				</Point>
			</Placemark>
			<Placemark id="ID_00185">
				<name>274</name>
				<Snippet maxLines="0"></Snippet>
				<description><![CDATA[<html xmlns:fo="http://www.w3.org/1999/XSL/Format" xmlns:msxsl="urn:schemas-microsoft-com:xslt">

<head>

<META http-equiv="Content-Type" content="text/html">

<meta http-equiv="content-type" content="text/html; charset=UTF-8">

</head>

<body style="margin:0px 0px 0px 0px;overflow:auto;background:#FFFFFF;">

<table style="font-family:Arial,Verdana,Times;font-size:12px;text-align:left;width:100%;border-collapse:collapse;padding:3px 3px 3px 3px">

<tr style="text-align:center;font-weight:bold;background:#9CBCE2">

<td>274</td>

</tr>

<tr>

<td>

<table style="font-family:Arial,Verdana,Times;font-size:12px;text-align:left;width:100%;border-spacing:0px; padding:3px 3px 3px 3px">

<tr>

<td>FID</td>

<td>185</td>

</tr>

<tr bgcolor="#D4E4F3">

<td>F1_for_irr</td>

<td>0</td>

</tr>

<tr>

<td>Name</td>

<td>274</td>

</tr>

<tr bgcolor="#D4E4F3">

<td>Name_2</td>

<td>274</td>

</tr>

<tr>

<td>Name_1</td>

<td>274</td>

</tr>

<tr bgcolor="#D4E4F3">

<td>F1_for_i_1</td>

<td>0</td>

</tr>

<tr>

<td>notes</td>

<td>wheat</td>

</tr>

<tr bgcolor="#D4E4F3">

<td>new_number</td>

<td>2</td>

</tr>

<tr>

<td>elevation</td>

<td>1687</td>

</tr>

</table>

</td>

</tr>

</table>

</body>

</html>]]></description>
				<styleUrl>#IconStyle09</styleUrl>
				<Point>
					<coordinates>-111.9589365255002,43.34486427016998,0</coordinates>
				</Point>
			</Placemark>
			<Placemark id="ID_00186">
				<name>275</name>
				<Snippet maxLines="0"></Snippet>
				<description><![CDATA[<html xmlns:fo="http://www.w3.org/1999/XSL/Format" xmlns:msxsl="urn:schemas-microsoft-com:xslt">

<head>

<META http-equiv="Content-Type" content="text/html">

<meta http-equiv="content-type" content="text/html; charset=UTF-8">

</head>

<body style="margin:0px 0px 0px 0px;overflow:auto;background:#FFFFFF;">

<table style="font-family:Arial,Verdana,Times;font-size:12px;text-align:left;width:100%;border-collapse:collapse;padding:3px 3px 3px 3px">

<tr style="text-align:center;font-weight:bold;background:#9CBCE2">

<td>275</td>

</tr>

<tr>

<td>

<table style="font-family:Arial,Verdana,Times;font-size:12px;text-align:left;width:100%;border-spacing:0px; padding:3px 3px 3px 3px">

<tr>

<td>FID</td>

<td>186</td>

</tr>

<tr bgcolor="#D4E4F3">

<td>F1_for_irr</td>

<td>0</td>

</tr>

<tr>

<td>Name</td>

<td>275</td>

</tr>

<tr bgcolor="#D4E4F3">

<td>Name_2</td>

<td>275</td>

</tr>

<tr>

<td>Name_1</td>

<td>275</td>

</tr>

<tr bgcolor="#D4E4F3">

<td>F1_for_i_1</td>

<td>0</td>

</tr>

<tr>

<td>notes</td>

<td></td>

</tr>

<tr bgcolor="#D4E4F3">

<td>new_number</td>

<td>0</td>

</tr>

<tr>

<td>elevation</td>

<td>1753</td>

</tr>

</table>

</td>

</tr>

</table>

</body>

</html>]]></description>
				<styleUrl>#IconStyle09</styleUrl>
				<Point>
					<coordinates>-111.9629002568414,43.18012789038988,0</coordinates>
				</Point>
			</Placemark>
			<Placemark id="ID_00187">
				<name>277</name>
				<Snippet maxLines="0"></Snippet>
				<description><![CDATA[<html xmlns:fo="http://www.w3.org/1999/XSL/Format" xmlns:msxsl="urn:schemas-microsoft-com:xslt">

<head>

<META http-equiv="Content-Type" content="text/html">

<meta http-equiv="content-type" content="text/html; charset=UTF-8">

</head>

<body style="margin:0px 0px 0px 0px;overflow:auto;background:#FFFFFF;">

<table style="font-family:Arial,Verdana,Times;font-size:12px;text-align:left;width:100%;border-collapse:collapse;padding:3px 3px 3px 3px">

<tr style="text-align:center;font-weight:bold;background:#9CBCE2">

<td>277</td>

</tr>

<tr>

<td>

<table style="font-family:Arial,Verdana,Times;font-size:12px;text-align:left;width:100%;border-spacing:0px; padding:3px 3px 3px 3px">

<tr>

<td>FID</td>

<td>187</td>

</tr>

<tr bgcolor="#D4E4F3">

<td>F1_for_irr</td>

<td>0</td>

</tr>

<tr>

<td>Name</td>

<td>277</td>

</tr>

<tr bgcolor="#D4E4F3">

<td>Name_2</td>

<td>277</td>

</tr>

<tr>

<td>Name_1</td>

<td>277</td>

</tr>

<tr bgcolor="#D4E4F3">

<td>F1_for_i_1</td>

<td>0</td>

</tr>

<tr>

<td>notes</td>

<td></td>

</tr>

<tr bgcolor="#D4E4F3">

<td>new_number</td>

<td>0</td>

</tr>

<tr>

<td>elevation</td>

<td>1708</td>

</tr>

</table>

</td>

</tr>

</table>

</body>

</html>]]></description>
				<styleUrl>#IconStyle09</styleUrl>
				<Point>
					<coordinates>-111.9668241527124,43.17770854411407,0</coordinates>
				</Point>
			</Placemark>
			<Placemark id="ID_00188">
				<name>278</name>
				<Snippet maxLines="0"></Snippet>
				<description><![CDATA[<html xmlns:fo="http://www.w3.org/1999/XSL/Format" xmlns:msxsl="urn:schemas-microsoft-com:xslt">

<head>

<META http-equiv="Content-Type" content="text/html">

<meta http-equiv="content-type" content="text/html; charset=UTF-8">

</head>

<body style="margin:0px 0px 0px 0px;overflow:auto;background:#FFFFFF;">

<table style="font-family:Arial,Verdana,Times;font-size:12px;text-align:left;width:100%;border-collapse:collapse;padding:3px 3px 3px 3px">

<tr style="text-align:center;font-weight:bold;background:#9CBCE2">

<td>278</td>

</tr>

<tr>

<td>

<table style="font-family:Arial,Verdana,Times;font-size:12px;text-align:left;width:100%;border-spacing:0px; padding:3px 3px 3px 3px">

<tr>

<td>FID</td>

<td>188</td>

</tr>

<tr bgcolor="#D4E4F3">

<td>F1_for_irr</td>

<td>0</td>

</tr>

<tr>

<td>Name</td>

<td>278</td>

</tr>

<tr bgcolor="#D4E4F3">

<td>Name_2</td>

<td>278</td>

</tr>

<tr>

<td>Name_1</td>

<td>278</td>

</tr>

<tr bgcolor="#D4E4F3">

<td>F1_for_i_1</td>

<td>0</td>

</tr>

<tr>

<td>notes</td>

<td></td>

</tr>

<tr bgcolor="#D4E4F3">

<td>new_number</td>

<td>0</td>

</tr>

<tr>

<td>elevation</td>

<td>1682</td>

</tr>

</table>

</td>

</tr>

</table>

</body>

</html>]]></description>
				<styleUrl>#IconStyle09</styleUrl>
				<Point>
					<coordinates>-112.0131722971638,43.17688424171445,0</coordinates>
				</Point>
			</Placemark>
			<Placemark id="ID_00189">
				<name>279</name>
				<Snippet maxLines="0"></Snippet>
				<description><![CDATA[<html xmlns:fo="http://www.w3.org/1999/XSL/Format" xmlns:msxsl="urn:schemas-microsoft-com:xslt">

<head>

<META http-equiv="Content-Type" content="text/html">

<meta http-equiv="content-type" content="text/html; charset=UTF-8">

</head>

<body style="margin:0px 0px 0px 0px;overflow:auto;background:#FFFFFF;">

<table style="font-family:Arial,Verdana,Times;font-size:12px;text-align:left;width:100%;border-collapse:collapse;padding:3px 3px 3px 3px">

<tr style="text-align:center;font-weight:bold;background:#9CBCE2">

<td>279</td>

</tr>

<tr>

<td>

<table style="font-family:Arial,Verdana,Times;font-size:12px;text-align:left;width:100%;border-spacing:0px; padding:3px 3px 3px 3px">

<tr>

<td>FID</td>

<td>189</td>

</tr>

<tr bgcolor="#D4E4F3">

<td>F1_for_irr</td>

<td>0</td>

</tr>

<tr>

<td>Name</td>

<td>279</td>

</tr>

<tr bgcolor="#D4E4F3">

<td>Name_2</td>

<td>279</td>

</tr>

<tr>

<td>Name_1</td>

<td>279</td>

</tr>

<tr bgcolor="#D4E4F3">

<td>F1_for_i_1</td>

<td>0</td>

</tr>

<tr>

<td>notes</td>

<td></td>

</tr>

<tr bgcolor="#D4E4F3">

<td>new_number</td>

<td>2</td>

</tr>

<tr>

<td>elevation</td>

<td>1542</td>

</tr>

</table>

</td>

</tr>

</table>

</body>

</html>]]></description>
				<styleUrl>#IconStyle09</styleUrl>
				<Point>
					<coordinates>-112.0155439604853,43.22938750273113,0</coordinates>
				</Point>
			</Placemark>
			<Placemark id="ID_00190">
				<name>280</name>
				<Snippet maxLines="0"></Snippet>
				<description><![CDATA[<html xmlns:fo="http://www.w3.org/1999/XSL/Format" xmlns:msxsl="urn:schemas-microsoft-com:xslt">

<head>

<META http-equiv="Content-Type" content="text/html">

<meta http-equiv="content-type" content="text/html; charset=UTF-8">

</head>

<body style="margin:0px 0px 0px 0px;overflow:auto;background:#FFFFFF;">

<table style="font-family:Arial,Verdana,Times;font-size:12px;text-align:left;width:100%;border-collapse:collapse;padding:3px 3px 3px 3px">

<tr style="text-align:center;font-weight:bold;background:#9CBCE2">

<td>280</td>

</tr>

<tr>

<td>

<table style="font-family:Arial,Verdana,Times;font-size:12px;text-align:left;width:100%;border-spacing:0px; padding:3px 3px 3px 3px">

<tr>

<td>FID</td>

<td>190</td>

</tr>

<tr bgcolor="#D4E4F3">

<td>F1_for_irr</td>

<td>0</td>

</tr>

<tr>

<td>Name</td>

<td>280</td>

</tr>

<tr bgcolor="#D4E4F3">

<td>Name_2</td>

<td>280</td>

</tr>

<tr>

<td>Name_1</td>

<td>280</td>

</tr>

<tr bgcolor="#D4E4F3">

<td>F1_for_i_1</td>

<td>0</td>

</tr>

<tr>

<td>notes</td>

<td></td>

</tr>

<tr bgcolor="#D4E4F3">

<td>new_number</td>

<td>0</td>

</tr>

<tr>

<td>elevation</td>

<td>1624</td>

</tr>

</table>

</td>

</tr>

</table>

</body>

</html>]]></description>
				<styleUrl>#IconStyle09</styleUrl>
				<Point>
					<coordinates>-111.9792632398066,43.21309025481145,0</coordinates>
				</Point>
			</Placemark>
			<Placemark id="ID_00191">
				<name>281</name>
				<Snippet maxLines="0"></Snippet>
				<description><![CDATA[<html xmlns:fo="http://www.w3.org/1999/XSL/Format" xmlns:msxsl="urn:schemas-microsoft-com:xslt">

<head>

<META http-equiv="Content-Type" content="text/html">

<meta http-equiv="content-type" content="text/html; charset=UTF-8">

</head>

<body style="margin:0px 0px 0px 0px;overflow:auto;background:#FFFFFF;">

<table style="font-family:Arial,Verdana,Times;font-size:12px;text-align:left;width:100%;border-collapse:collapse;padding:3px 3px 3px 3px">

<tr style="text-align:center;font-weight:bold;background:#9CBCE2">

<td>281</td>

</tr>

<tr>

<td>

<table style="font-family:Arial,Verdana,Times;font-size:12px;text-align:left;width:100%;border-spacing:0px; padding:3px 3px 3px 3px">

<tr>

<td>FID</td>

<td>191</td>

</tr>

<tr bgcolor="#D4E4F3">

<td>F1_for_irr</td>

<td>0</td>

</tr>

<tr>

<td>Name</td>

<td>281</td>

</tr>

<tr bgcolor="#D4E4F3">

<td>Name_2</td>

<td>281</td>

</tr>

<tr>

<td>Name_1</td>

<td>281</td>

</tr>

<tr bgcolor="#D4E4F3">

<td>F1_for_i_1</td>

<td>0</td>

</tr>

<tr>

<td>notes</td>

<td></td>

</tr>

<tr bgcolor="#D4E4F3">

<td>new_number</td>

<td>0</td>

</tr>

<tr>

<td>elevation</td>

<td>1558</td>

</tr>

</table>

</td>

</tr>

</table>

</body>

</html>]]></description>
				<styleUrl>#IconStyle09</styleUrl>
				<Point>
					<coordinates>-112.0224611616533,43.3513194437374,0</coordinates>
				</Point>
			</Placemark>
			<Placemark id="ID_00192">
				<name>282</name>
				<Snippet maxLines="0"></Snippet>
				<description><![CDATA[<html xmlns:fo="http://www.w3.org/1999/XSL/Format" xmlns:msxsl="urn:schemas-microsoft-com:xslt">

<head>

<META http-equiv="Content-Type" content="text/html">

<meta http-equiv="content-type" content="text/html; charset=UTF-8">

</head>

<body style="margin:0px 0px 0px 0px;overflow:auto;background:#FFFFFF;">

<table style="font-family:Arial,Verdana,Times;font-size:12px;text-align:left;width:100%;border-collapse:collapse;padding:3px 3px 3px 3px">

<tr style="text-align:center;font-weight:bold;background:#9CBCE2">

<td>282</td>

</tr>

<tr>

<td>

<table style="font-family:Arial,Verdana,Times;font-size:12px;text-align:left;width:100%;border-spacing:0px; padding:3px 3px 3px 3px">

<tr>

<td>FID</td>

<td>192</td>

</tr>

<tr bgcolor="#D4E4F3">

<td>F1_for_irr</td>

<td>0</td>

</tr>

<tr>

<td>Name</td>

<td>282</td>

</tr>

<tr bgcolor="#D4E4F3">

<td>Name_2</td>

<td>282</td>

</tr>

<tr>

<td>Name_1</td>

<td>282</td>

</tr>

<tr bgcolor="#D4E4F3">

<td>F1_for_i_1</td>

<td>0</td>

</tr>

<tr>

<td>notes</td>

<td>wheat</td>

</tr>

<tr bgcolor="#D4E4F3">

<td>new_number</td>

<td>2</td>

</tr>

<tr>

<td>elevation</td>

<td>1744</td>

</tr>

</table>

</td>

</tr>

</table>

</body>

</html>]]></description>
				<styleUrl>#IconStyle09</styleUrl>
				<Point>
					<coordinates>-111.9662766994101,43.02730530009956,0</coordinates>
				</Point>
			</Placemark>
			<Placemark id="ID_00193">
				<name>283</name>
				<Snippet maxLines="0"></Snippet>
				<description><![CDATA[<html xmlns:fo="http://www.w3.org/1999/XSL/Format" xmlns:msxsl="urn:schemas-microsoft-com:xslt">

<head>

<META http-equiv="Content-Type" content="text/html">

<meta http-equiv="content-type" content="text/html; charset=UTF-8">

</head>

<body style="margin:0px 0px 0px 0px;overflow:auto;background:#FFFFFF;">

<table style="font-family:Arial,Verdana,Times;font-size:12px;text-align:left;width:100%;border-collapse:collapse;padding:3px 3px 3px 3px">

<tr style="text-align:center;font-weight:bold;background:#9CBCE2">

<td>283</td>

</tr>

<tr>

<td>

<table style="font-family:Arial,Verdana,Times;font-size:12px;text-align:left;width:100%;border-spacing:0px; padding:3px 3px 3px 3px">

<tr>

<td>FID</td>

<td>193</td>

</tr>

<tr bgcolor="#D4E4F3">

<td>F1_for_irr</td>

<td>1</td>

</tr>

<tr>

<td>Name</td>

<td>283</td>

</tr>

<tr bgcolor="#D4E4F3">

<td>Name_2</td>

<td>283</td>

</tr>

<tr>

<td>Name_1</td>

<td>283</td>

</tr>

<tr bgcolor="#D4E4F3">

<td>F1_for_i_1</td>

<td>1</td>

</tr>

<tr>

<td>notes</td>

<td></td>

</tr>

<tr bgcolor="#D4E4F3">

<td>new_number</td>

<td>1</td>

</tr>

<tr>

<td>elevation</td>

<td>1336</td>

</tr>

</table>

</td>

</tr>

</table>

</body>

</html>]]></description>
				<styleUrl>#IconStyle00</styleUrl>
				<Point>
					<coordinates>-113.3203009955944,42.75131389252215,0</coordinates>
				</Point>
			</Placemark>
			<Placemark id="ID_00194">
				<name>284</name>
				<Snippet maxLines="0"></Snippet>
				<description><![CDATA[<html xmlns:fo="http://www.w3.org/1999/XSL/Format" xmlns:msxsl="urn:schemas-microsoft-com:xslt">

<head>

<META http-equiv="Content-Type" content="text/html">

<meta http-equiv="content-type" content="text/html; charset=UTF-8">

</head>

<body style="margin:0px 0px 0px 0px;overflow:auto;background:#FFFFFF;">

<table style="font-family:Arial,Verdana,Times;font-size:12px;text-align:left;width:100%;border-collapse:collapse;padding:3px 3px 3px 3px">

<tr style="text-align:center;font-weight:bold;background:#9CBCE2">

<td>284</td>

</tr>

<tr>

<td>

<table style="font-family:Arial,Verdana,Times;font-size:12px;text-align:left;width:100%;border-spacing:0px; padding:3px 3px 3px 3px">

<tr>

<td>FID</td>

<td>194</td>

</tr>

<tr bgcolor="#D4E4F3">

<td>F1_for_irr</td>

<td>1</td>

</tr>

<tr>

<td>Name</td>

<td>284</td>

</tr>

<tr bgcolor="#D4E4F3">

<td>Name_2</td>

<td>284</td>

</tr>

<tr>

<td>Name_1</td>

<td>284</td>

</tr>

<tr bgcolor="#D4E4F3">

<td>F1_for_i_1</td>

<td>1</td>

</tr>

<tr>

<td>notes</td>

<td></td>

</tr>

<tr bgcolor="#D4E4F3">

<td>new_number</td>

<td>1</td>

</tr>

<tr>

<td>elevation</td>

<td>1474</td>

</tr>

</table>

</td>

</tr>

</table>

</body>

</html>]]></description>
				<styleUrl>#IconStyle00</styleUrl>
				<Point>
					<coordinates>-113.9888512256035,43.32349234489584,0</coordinates>
				</Point>
			</Placemark>
			<Placemark id="ID_00195">
				<name>285</name>
				<Snippet maxLines="0"></Snippet>
				<description><![CDATA[<html xmlns:fo="http://www.w3.org/1999/XSL/Format" xmlns:msxsl="urn:schemas-microsoft-com:xslt">

<head>

<META http-equiv="Content-Type" content="text/html">

<meta http-equiv="content-type" content="text/html; charset=UTF-8">

</head>

<body style="margin:0px 0px 0px 0px;overflow:auto;background:#FFFFFF;">

<table style="font-family:Arial,Verdana,Times;font-size:12px;text-align:left;width:100%;border-collapse:collapse;padding:3px 3px 3px 3px">

<tr style="text-align:center;font-weight:bold;background:#9CBCE2">

<td>285</td>

</tr>

<tr>

<td>

<table style="font-family:Arial,Verdana,Times;font-size:12px;text-align:left;width:100%;border-spacing:0px; padding:3px 3px 3px 3px">

<tr>

<td>FID</td>

<td>195</td>

</tr>

<tr bgcolor="#D4E4F3">

<td>F1_for_irr</td>

<td>1</td>

</tr>

<tr>

<td>Name</td>

<td>285</td>

</tr>

<tr bgcolor="#D4E4F3">

<td>Name_2</td>

<td>285</td>

</tr>

<tr>

<td>Name_1</td>

<td>285</td>

</tr>

<tr bgcolor="#D4E4F3">

<td>F1_for_i_1</td>

<td>1</td>

</tr>

<tr>

<td>notes</td>

<td></td>

</tr>

<tr bgcolor="#D4E4F3">

<td>new_number</td>

<td>1</td>

</tr>

<tr>

<td>elevation</td>

<td>1511</td>

</tr>

</table>

</td>

</tr>

</table>

</body>

</html>]]></description>
				<styleUrl>#IconStyle00</styleUrl>
				<Point>
					<coordinates>-113.9521156521156,43.35739231010706,0</coordinates>
				</Point>
			</Placemark>
			<Placemark id="ID_00196">
				<name>286</name>
				<Snippet maxLines="0"></Snippet>
				<description><![CDATA[<html xmlns:fo="http://www.w3.org/1999/XSL/Format" xmlns:msxsl="urn:schemas-microsoft-com:xslt">

<head>

<META http-equiv="Content-Type" content="text/html">

<meta http-equiv="content-type" content="text/html; charset=UTF-8">

</head>

<body style="margin:0px 0px 0px 0px;overflow:auto;background:#FFFFFF;">

<table style="font-family:Arial,Verdana,Times;font-size:12px;text-align:left;width:100%;border-collapse:collapse;padding:3px 3px 3px 3px">

<tr style="text-align:center;font-weight:bold;background:#9CBCE2">

<td>286</td>

</tr>

<tr>

<td>

<table style="font-family:Arial,Verdana,Times;font-size:12px;text-align:left;width:100%;border-spacing:0px; padding:3px 3px 3px 3px">

<tr>

<td>FID</td>

<td>196</td>

</tr>

<tr bgcolor="#D4E4F3">

<td>F1_for_irr</td>

<td>1</td>

</tr>

<tr>

<td>Name</td>

<td>286</td>

</tr>

<tr bgcolor="#D4E4F3">

<td>Name_2</td>

<td>286</td>

</tr>

<tr>

<td>Name_1</td>

<td>286</td>

</tr>

<tr bgcolor="#D4E4F3">

<td>F1_for_i_1</td>

<td>1</td>

</tr>

<tr>

<td>notes</td>

<td></td>

</tr>

<tr bgcolor="#D4E4F3">

<td>new_number</td>

<td>1</td>

</tr>

<tr>

<td>elevation</td>

<td>1443</td>

</tr>

</table>

</td>

</tr>

</table>

</body>

</html>]]></description>
				<styleUrl>#IconStyle00</styleUrl>
				<Point>
					<coordinates>-113.9358353636111,43.26183027844462,0</coordinates>
				</Point>
			</Placemark>
			<Placemark id="ID_00197">
				<name>287</name>
				<Snippet maxLines="0"></Snippet>
				<description><![CDATA[<html xmlns:fo="http://www.w3.org/1999/XSL/Format" xmlns:msxsl="urn:schemas-microsoft-com:xslt">

<head>

<META http-equiv="Content-Type" content="text/html">

<meta http-equiv="content-type" content="text/html; charset=UTF-8">

</head>

<body style="margin:0px 0px 0px 0px;overflow:auto;background:#FFFFFF;">

<table style="font-family:Arial,Verdana,Times;font-size:12px;text-align:left;width:100%;border-collapse:collapse;padding:3px 3px 3px 3px">

<tr style="text-align:center;font-weight:bold;background:#9CBCE2">

<td>287</td>

</tr>

<tr>

<td>

<table style="font-family:Arial,Verdana,Times;font-size:12px;text-align:left;width:100%;border-spacing:0px; padding:3px 3px 3px 3px">

<tr>

<td>FID</td>

<td>197</td>

</tr>

<tr bgcolor="#D4E4F3">

<td>F1_for_irr</td>

<td>0</td>

</tr>

<tr>

<td>Name</td>

<td>287</td>

</tr>

<tr bgcolor="#D4E4F3">

<td>Name_2</td>

<td>287</td>

</tr>

<tr>

<td>Name_1</td>

<td>287</td>

</tr>

<tr bgcolor="#D4E4F3">

<td>F1_for_i_1</td>

<td>0</td>

</tr>

<tr>

<td>notes</td>

<td></td>

</tr>

<tr bgcolor="#D4E4F3">

<td>new_number</td>

<td>0</td>

</tr>

<tr>

<td>elevation</td>

<td>1720</td>

</tr>

</table>

</td>

</tr>

</table>

</body>

</html>]]></description>
				<styleUrl>#IconStyle09</styleUrl>
				<Point>
					<coordinates>-113.7768552978337,43.4859031785889,0</coordinates>
				</Point>
			</Placemark>
			<Placemark id="ID_00198">
				<name>288</name>
				<Snippet maxLines="0"></Snippet>
				<description><![CDATA[<html xmlns:fo="http://www.w3.org/1999/XSL/Format" xmlns:msxsl="urn:schemas-microsoft-com:xslt">

<head>

<META http-equiv="Content-Type" content="text/html">

<meta http-equiv="content-type" content="text/html; charset=UTF-8">

</head>

<body style="margin:0px 0px 0px 0px;overflow:auto;background:#FFFFFF;">

<table style="font-family:Arial,Verdana,Times;font-size:12px;text-align:left;width:100%;border-collapse:collapse;padding:3px 3px 3px 3px">

<tr style="text-align:center;font-weight:bold;background:#9CBCE2">

<td>288</td>

</tr>

<tr>

<td>

<table style="font-family:Arial,Verdana,Times;font-size:12px;text-align:left;width:100%;border-spacing:0px; padding:3px 3px 3px 3px">

<tr>

<td>FID</td>

<td>198</td>

</tr>

<tr bgcolor="#D4E4F3">

<td>F1_for_irr</td>

<td>0</td>

</tr>

<tr>

<td>Name</td>

<td>288</td>

</tr>

<tr bgcolor="#D4E4F3">

<td>Name_2</td>

<td>288</td>

</tr>

<tr>

<td>Name_1</td>

<td>288</td>

</tr>

<tr bgcolor="#D4E4F3">

<td>F1_for_i_1</td>

<td>0</td>

</tr>

<tr>

<td>notes</td>

<td>wheat</td>

</tr>

<tr bgcolor="#D4E4F3">

<td>new_number</td>

<td>2</td>

</tr>

<tr>

<td>elevation</td>

<td>1479</td>

</tr>

</table>

</td>

</tr>

</table>

</body>

</html>]]></description>
				<styleUrl>#IconStyle09</styleUrl>
				<Point>
					<coordinates>-113.8691770685668,43.34813294248136,0</coordinates>
				</Point>
			</Placemark>
			<Placemark id="ID_00199">
				<name>289</name>
				<Snippet maxLines="0"></Snippet>
				<description><![CDATA[<html xmlns:fo="http://www.w3.org/1999/XSL/Format" xmlns:msxsl="urn:schemas-microsoft-com:xslt">

<head>

<META http-equiv="Content-Type" content="text/html">

<meta http-equiv="content-type" content="text/html; charset=UTF-8">

</head>

<body style="margin:0px 0px 0px 0px;overflow:auto;background:#FFFFFF;">

<table style="font-family:Arial,Verdana,Times;font-size:12px;text-align:left;width:100%;border-collapse:collapse;padding:3px 3px 3px 3px">

<tr style="text-align:center;font-weight:bold;background:#9CBCE2">

<td>289</td>

</tr>

<tr>

<td>

<table style="font-family:Arial,Verdana,Times;font-size:12px;text-align:left;width:100%;border-spacing:0px; padding:3px 3px 3px 3px">

<tr>

<td>FID</td>

<td>199</td>

</tr>

<tr bgcolor="#D4E4F3">

<td>F1_for_irr</td>

<td>0</td>

</tr>

<tr>

<td>Name</td>

<td>289</td>

</tr>

<tr bgcolor="#D4E4F3">

<td>Name_2</td>

<td>289</td>

</tr>

<tr>

<td>Name_1</td>

<td>289</td>

</tr>

<tr bgcolor="#D4E4F3">

<td>F1_for_i_1</td>

<td>0</td>

</tr>

<tr>

<td>notes</td>

<td>wheat</td>

</tr>

<tr bgcolor="#D4E4F3">

<td>new_number</td>

<td>2</td>

</tr>

<tr>

<td>elevation</td>

<td>1472</td>

</tr>

</table>

</td>

</tr>

</table>

</body>

</html>]]></description>
				<styleUrl>#IconStyle09</styleUrl>
				<Point>
					<coordinates>-113.9363049374229,43.3376220576119,0</coordinates>
				</Point>
			</Placemark>
			<Placemark id="ID_00200">
				<name>290</name>
				<Snippet maxLines="0"></Snippet>
				<description><![CDATA[<html xmlns:fo="http://www.w3.org/1999/XSL/Format" xmlns:msxsl="urn:schemas-microsoft-com:xslt">

<head>

<META http-equiv="Content-Type" content="text/html">

<meta http-equiv="content-type" content="text/html; charset=UTF-8">

</head>

<body style="margin:0px 0px 0px 0px;overflow:auto;background:#FFFFFF;">

<table style="font-family:Arial,Verdana,Times;font-size:12px;text-align:left;width:100%;border-collapse:collapse;padding:3px 3px 3px 3px">

<tr style="text-align:center;font-weight:bold;background:#9CBCE2">

<td>290</td>

</tr>

<tr>

<td>

<table style="font-family:Arial,Verdana,Times;font-size:12px;text-align:left;width:100%;border-spacing:0px; padding:3px 3px 3px 3px">

<tr>

<td>FID</td>

<td>200</td>

</tr>

<tr bgcolor="#D4E4F3">

<td>F1_for_irr</td>

<td>1</td>

</tr>

<tr>

<td>Name</td>

<td>290</td>

</tr>

<tr bgcolor="#D4E4F3">

<td>Name_2</td>

<td>290</td>

</tr>

<tr>

<td>Name_1</td>

<td>290</td>

</tr>

<tr bgcolor="#D4E4F3">

<td>F1_for_i_1</td>

<td>1</td>

</tr>

<tr>

<td>notes</td>

<td></td>

</tr>

<tr bgcolor="#D4E4F3">

<td>new_number</td>

<td>1</td>

</tr>

<tr>

<td>elevation</td>

<td>1460</td>

</tr>

</table>

</td>

</tr>

</table>

</body>

</html>]]></description>
				<styleUrl>#IconStyle00</styleUrl>
				<Point>
					<coordinates>-112.0899261314858,43.53617591048993,0</coordinates>
				</Point>
			</Placemark>
			<Placemark id="ID_00201">
				<name>291</name>
				<Snippet maxLines="0"></Snippet>
				<description><![CDATA[<html xmlns:fo="http://www.w3.org/1999/XSL/Format" xmlns:msxsl="urn:schemas-microsoft-com:xslt">

<head>

<META http-equiv="Content-Type" content="text/html">

<meta http-equiv="content-type" content="text/html; charset=UTF-8">

</head>

<body style="margin:0px 0px 0px 0px;overflow:auto;background:#FFFFFF;">

<table style="font-family:Arial,Verdana,Times;font-size:12px;text-align:left;width:100%;border-collapse:collapse;padding:3px 3px 3px 3px">

<tr style="text-align:center;font-weight:bold;background:#9CBCE2">

<td>291</td>

</tr>

<tr>

<td>

<table style="font-family:Arial,Verdana,Times;font-size:12px;text-align:left;width:100%;border-spacing:0px; padding:3px 3px 3px 3px">

<tr>

<td>FID</td>

<td>201</td>

</tr>

<tr bgcolor="#D4E4F3">

<td>F1_for_irr</td>

<td>1</td>

</tr>

<tr>

<td>Name</td>

<td>291</td>

</tr>

<tr bgcolor="#D4E4F3">

<td>Name_2</td>

<td>291</td>

</tr>

<tr>

<td>Name_1</td>

<td>291</td>

</tr>

<tr bgcolor="#D4E4F3">

<td>F1_for_i_1</td>

<td>1</td>

</tr>

<tr>

<td>notes</td>

<td></td>

</tr>

<tr bgcolor="#D4E4F3">

<td>new_number</td>

<td>1</td>

</tr>

<tr>

<td>elevation</td>

<td>1500</td>

</tr>

</table>

</td>

</tr>

</table>

</body>

</html>]]></description>
				<styleUrl>#IconStyle00</styleUrl>
				<Point>
					<coordinates>-112.2575701264601,43.57256004151276,0</coordinates>
				</Point>
			</Placemark>
			<Placemark id="ID_00202">
				<name>293</name>
				<Snippet maxLines="0"></Snippet>
				<description><![CDATA[<html xmlns:fo="http://www.w3.org/1999/XSL/Format" xmlns:msxsl="urn:schemas-microsoft-com:xslt">

<head>

<META http-equiv="Content-Type" content="text/html">

<meta http-equiv="content-type" content="text/html; charset=UTF-8">

</head>

<body style="margin:0px 0px 0px 0px;overflow:auto;background:#FFFFFF;">

<table style="font-family:Arial,Verdana,Times;font-size:12px;text-align:left;width:100%;border-collapse:collapse;padding:3px 3px 3px 3px">

<tr style="text-align:center;font-weight:bold;background:#9CBCE2">

<td>293</td>

</tr>

<tr>

<td>

<table style="font-family:Arial,Verdana,Times;font-size:12px;text-align:left;width:100%;border-spacing:0px; padding:3px 3px 3px 3px">

<tr>

<td>FID</td>

<td>202</td>

</tr>

<tr bgcolor="#D4E4F3">

<td>F1_for_irr</td>

<td>1</td>

</tr>

<tr>

<td>Name</td>

<td>293</td>

</tr>

<tr bgcolor="#D4E4F3">

<td>Name_2</td>

<td>293</td>

</tr>

<tr>

<td>Name_1</td>

<td>293</td>

</tr>

<tr bgcolor="#D4E4F3">

<td>F1_for_i_1</td>

<td>1</td>

</tr>

<tr>

<td>notes</td>

<td></td>

</tr>

<tr bgcolor="#D4E4F3">

<td>new_number</td>

<td>1</td>

</tr>

<tr>

<td>elevation</td>

<td>1534</td>

</tr>

</table>

</td>

</tr>

</table>

</body>

</html>]]></description>
				<styleUrl>#IconStyle00</styleUrl>
				<Point>
					<coordinates>-111.8503558422483,43.57977204224602,0</coordinates>
				</Point>
			</Placemark>
			<Placemark id="ID_00203">
				<name>294</name>
				<Snippet maxLines="0"></Snippet>
				<description><![CDATA[<html xmlns:fo="http://www.w3.org/1999/XSL/Format" xmlns:msxsl="urn:schemas-microsoft-com:xslt">

<head>

<META http-equiv="Content-Type" content="text/html">

<meta http-equiv="content-type" content="text/html; charset=UTF-8">

</head>

<body style="margin:0px 0px 0px 0px;overflow:auto;background:#FFFFFF;">

<table style="font-family:Arial,Verdana,Times;font-size:12px;text-align:left;width:100%;border-collapse:collapse;padding:3px 3px 3px 3px">

<tr style="text-align:center;font-weight:bold;background:#9CBCE2">

<td>294</td>

</tr>

<tr>

<td>

<table style="font-family:Arial,Verdana,Times;font-size:12px;text-align:left;width:100%;border-spacing:0px; padding:3px 3px 3px 3px">

<tr>

<td>FID</td>

<td>203</td>

</tr>

<tr bgcolor="#D4E4F3">

<td>F1_for_irr</td>

<td>1</td>

</tr>

<tr>

<td>Name</td>

<td>294</td>

</tr>

<tr bgcolor="#D4E4F3">

<td>Name_2</td>

<td>294</td>

</tr>

<tr>

<td>Name_1</td>

<td>294</td>

</tr>

<tr bgcolor="#D4E4F3">

<td>F1_for_i_1</td>

<td>1</td>

</tr>

<tr>

<td>notes</td>

<td></td>

</tr>

<tr bgcolor="#D4E4F3">

<td>new_number</td>

<td>1</td>

</tr>

<tr>

<td>elevation</td>

<td>1424</td>

</tr>

</table>

</td>

</tr>

</table>

</body>

</html>]]></description>
				<styleUrl>#IconStyle00</styleUrl>
				<Point>
					<coordinates>-112.0092569151745,43.39961035853128,0</coordinates>
				</Point>
			</Placemark>
			<Placemark id="ID_00204">
				<name>295</name>
				<Snippet maxLines="0"></Snippet>
				<description><![CDATA[<html xmlns:fo="http://www.w3.org/1999/XSL/Format" xmlns:msxsl="urn:schemas-microsoft-com:xslt">

<head>

<META http-equiv="Content-Type" content="text/html">

<meta http-equiv="content-type" content="text/html; charset=UTF-8">

</head>

<body style="margin:0px 0px 0px 0px;overflow:auto;background:#FFFFFF;">

<table style="font-family:Arial,Verdana,Times;font-size:12px;text-align:left;width:100%;border-collapse:collapse;padding:3px 3px 3px 3px">

<tr style="text-align:center;font-weight:bold;background:#9CBCE2">

<td>295</td>

</tr>

<tr>

<td>

<table style="font-family:Arial,Verdana,Times;font-size:12px;text-align:left;width:100%;border-spacing:0px; padding:3px 3px 3px 3px">

<tr>

<td>FID</td>

<td>204</td>

</tr>

<tr bgcolor="#D4E4F3">

<td>F1_for_irr</td>

<td>1</td>

</tr>

<tr>

<td>Name</td>

<td>295</td>

</tr>

<tr bgcolor="#D4E4F3">

<td>Name_2</td>

<td>295</td>

</tr>

<tr>

<td>Name_1</td>

<td>295</td>

</tr>

<tr bgcolor="#D4E4F3">

<td>F1_for_i_1</td>

<td>1</td>

</tr>

<tr>

<td>notes</td>

<td></td>

</tr>

<tr bgcolor="#D4E4F3">

<td>new_number</td>

<td>1</td>

</tr>

<tr>

<td>elevation</td>

<td>1434</td>

</tr>

</table>

</td>

</tr>

</table>

</body>

</html>]]></description>
				<styleUrl>#IconStyle00</styleUrl>
				<Point>
					<coordinates>-112.0093995845232,43.45726385344415,0</coordinates>
				</Point>
			</Placemark>
			<Placemark id="ID_00205">
				<name>296</name>
				<Snippet maxLines="0"></Snippet>
				<description><![CDATA[<html xmlns:fo="http://www.w3.org/1999/XSL/Format" xmlns:msxsl="urn:schemas-microsoft-com:xslt">

<head>

<META http-equiv="Content-Type" content="text/html">

<meta http-equiv="content-type" content="text/html; charset=UTF-8">

</head>

<body style="margin:0px 0px 0px 0px;overflow:auto;background:#FFFFFF;">

<table style="font-family:Arial,Verdana,Times;font-size:12px;text-align:left;width:100%;border-collapse:collapse;padding:3px 3px 3px 3px">

<tr style="text-align:center;font-weight:bold;background:#9CBCE2">

<td>296</td>

</tr>

<tr>

<td>

<table style="font-family:Arial,Verdana,Times;font-size:12px;text-align:left;width:100%;border-spacing:0px; padding:3px 3px 3px 3px">

<tr>

<td>FID</td>

<td>205</td>

</tr>

<tr bgcolor="#D4E4F3">

<td>F1_for_irr</td>

<td>1</td>

</tr>

<tr>

<td>Name</td>

<td>296</td>

</tr>

<tr bgcolor="#D4E4F3">

<td>Name_2</td>

<td>296</td>

</tr>

<tr>

<td>Name_1</td>

<td>296</td>

</tr>

<tr bgcolor="#D4E4F3">

<td>F1_for_i_1</td>

<td>1</td>

</tr>

<tr>

<td>notes</td>

<td></td>

</tr>

<tr bgcolor="#D4E4F3">

<td>new_number</td>

<td>1</td>

</tr>

<tr>

<td>elevation</td>

<td>1414</td>

</tr>

</table>

</td>

</tr>

</table>

</body>

</html>]]></description>
				<styleUrl>#IconStyle00</styleUrl>
				<Point>
					<coordinates>-112.1525418165516,43.42960903862627,0</coordinates>
				</Point>
			</Placemark>
			<Placemark id="ID_00206">
				<name>297</name>
				<Snippet maxLines="0"></Snippet>
				<description><![CDATA[<html xmlns:fo="http://www.w3.org/1999/XSL/Format" xmlns:msxsl="urn:schemas-microsoft-com:xslt">

<head>

<META http-equiv="Content-Type" content="text/html">

<meta http-equiv="content-type" content="text/html; charset=UTF-8">

</head>

<body style="margin:0px 0px 0px 0px;overflow:auto;background:#FFFFFF;">

<table style="font-family:Arial,Verdana,Times;font-size:12px;text-align:left;width:100%;border-collapse:collapse;padding:3px 3px 3px 3px">

<tr style="text-align:center;font-weight:bold;background:#9CBCE2">

<td>297</td>

</tr>

<tr>

<td>

<table style="font-family:Arial,Verdana,Times;font-size:12px;text-align:left;width:100%;border-spacing:0px; padding:3px 3px 3px 3px">

<tr>

<td>FID</td>

<td>206</td>

</tr>

<tr bgcolor="#D4E4F3">

<td>F1_for_irr</td>

<td>1</td>

</tr>

<tr>

<td>Name</td>

<td>297</td>

</tr>

<tr bgcolor="#D4E4F3">

<td>Name_2</td>

<td>297</td>

</tr>

<tr>

<td>Name_1</td>

<td>297</td>

</tr>

<tr bgcolor="#D4E4F3">

<td>F1_for_i_1</td>

<td>1</td>

</tr>

<tr>

<td>notes</td>

<td></td>

</tr>

<tr bgcolor="#D4E4F3">

<td>new_number</td>

<td>1</td>

</tr>

<tr>

<td>elevation</td>

<td>1583</td>

</tr>

</table>

</td>

</tr>

</table>

</body>

</html>]]></description>
				<styleUrl>#IconStyle00</styleUrl>
				<Point>
					<coordinates>-112.3370329364208,43.57116299597556,0</coordinates>
				</Point>
			</Placemark>
			<Placemark id="ID_00207">
				<name>298</name>
				<Snippet maxLines="0"></Snippet>
				<description><![CDATA[<html xmlns:fo="http://www.w3.org/1999/XSL/Format" xmlns:msxsl="urn:schemas-microsoft-com:xslt">

<head>

<META http-equiv="Content-Type" content="text/html">

<meta http-equiv="content-type" content="text/html; charset=UTF-8">

</head>

<body style="margin:0px 0px 0px 0px;overflow:auto;background:#FFFFFF;">

<table style="font-family:Arial,Verdana,Times;font-size:12px;text-align:left;width:100%;border-collapse:collapse;padding:3px 3px 3px 3px">

<tr style="text-align:center;font-weight:bold;background:#9CBCE2">

<td>298</td>

</tr>

<tr>

<td>

<table style="font-family:Arial,Verdana,Times;font-size:12px;text-align:left;width:100%;border-spacing:0px; padding:3px 3px 3px 3px">

<tr>

<td>FID</td>

<td>207</td>

</tr>

<tr bgcolor="#D4E4F3">

<td>F1_for_irr</td>

<td>1</td>

</tr>

<tr>

<td>Name</td>

<td>298</td>

</tr>

<tr bgcolor="#D4E4F3">

<td>Name_2</td>

<td>298</td>

</tr>

<tr>

<td>Name_1</td>

<td>298</td>

</tr>

<tr bgcolor="#D4E4F3">

<td>F1_for_i_1</td>

<td>1</td>

</tr>

<tr>

<td>notes</td>

<td></td>

</tr>

<tr bgcolor="#D4E4F3">

<td>new_number</td>

<td>1</td>

</tr>

<tr>

<td>elevation</td>

<td>1524</td>

</tr>

</table>

</td>

</tr>

</table>

</body>

</html>]]></description>
				<styleUrl>#IconStyle00</styleUrl>
				<Point>
					<coordinates>-112.3052848303306,43.62292492694388,0</coordinates>
				</Point>
			</Placemark>
			<Placemark id="ID_00208">
				<name>299</name>
				<Snippet maxLines="0"></Snippet>
				<description><![CDATA[<html xmlns:fo="http://www.w3.org/1999/XSL/Format" xmlns:msxsl="urn:schemas-microsoft-com:xslt">

<head>

<META http-equiv="Content-Type" content="text/html">

<meta http-equiv="content-type" content="text/html; charset=UTF-8">

</head>

<body style="margin:0px 0px 0px 0px;overflow:auto;background:#FFFFFF;">

<table style="font-family:Arial,Verdana,Times;font-size:12px;text-align:left;width:100%;border-collapse:collapse;padding:3px 3px 3px 3px">

<tr style="text-align:center;font-weight:bold;background:#9CBCE2">

<td>299</td>

</tr>

<tr>

<td>

<table style="font-family:Arial,Verdana,Times;font-size:12px;text-align:left;width:100%;border-spacing:0px; padding:3px 3px 3px 3px">

<tr>

<td>FID</td>

<td>208</td>

</tr>

<tr bgcolor="#D4E4F3">

<td>F1_for_irr</td>

<td>1</td>

</tr>

<tr>

<td>Name</td>

<td>299</td>

</tr>

<tr bgcolor="#D4E4F3">

<td>Name_2</td>

<td>299</td>

</tr>

<tr>

<td>Name_1</td>

<td>299</td>

</tr>

<tr bgcolor="#D4E4F3">

<td>F1_for_i_1</td>

<td>1</td>

</tr>

<tr>

<td>notes</td>

<td></td>

</tr>

<tr bgcolor="#D4E4F3">

<td>new_number</td>

<td>1</td>

</tr>

<tr>

<td>elevation</td>

<td>1457</td>

</tr>

</table>

</td>

</tr>

</table>

</body>

</html>]]></description>
				<styleUrl>#IconStyle00</styleUrl>
				<Point>
					<coordinates>-112.1083187970748,43.5936253879014,0</coordinates>
				</Point>
			</Placemark>
			<Placemark id="ID_00209">
				<name>300</name>
				<Snippet maxLines="0"></Snippet>
				<description><![CDATA[<html xmlns:fo="http://www.w3.org/1999/XSL/Format" xmlns:msxsl="urn:schemas-microsoft-com:xslt">

<head>

<META http-equiv="Content-Type" content="text/html">

<meta http-equiv="content-type" content="text/html; charset=UTF-8">

</head>

<body style="margin:0px 0px 0px 0px;overflow:auto;background:#FFFFFF;">

<table style="font-family:Arial,Verdana,Times;font-size:12px;text-align:left;width:100%;border-collapse:collapse;padding:3px 3px 3px 3px">

<tr style="text-align:center;font-weight:bold;background:#9CBCE2">

<td>300</td>

</tr>

<tr>

<td>

<table style="font-family:Arial,Verdana,Times;font-size:12px;text-align:left;width:100%;border-spacing:0px; padding:3px 3px 3px 3px">

<tr>

<td>FID</td>

<td>209</td>

</tr>

<tr bgcolor="#D4E4F3">

<td>F1_for_irr</td>

<td>0</td>

</tr>

<tr>

<td>Name</td>

<td>300</td>

</tr>

<tr bgcolor="#D4E4F3">

<td>Name_2</td>

<td>300</td>

</tr>

<tr>

<td>Name_1</td>

<td>300</td>

</tr>

<tr bgcolor="#D4E4F3">

<td>F1_for_i_1</td>

<td>0</td>

</tr>

<tr>

<td>notes</td>

<td>wheat</td>

</tr>

<tr bgcolor="#D4E4F3">

<td>new_number</td>

<td>2</td>

</tr>

<tr>

<td>elevation</td>

<td>1687</td>

</tr>

</table>

</td>

</tr>

</table>

</body>

</html>]]></description>
				<styleUrl>#IconStyle09</styleUrl>
				<Point>
					<coordinates>-111.7943146806779,43.49240224446805,0</coordinates>
				</Point>
			</Placemark>
			<Placemark id="ID_00210">
				<name>301</name>
				<Snippet maxLines="0"></Snippet>
				<description><![CDATA[<html xmlns:fo="http://www.w3.org/1999/XSL/Format" xmlns:msxsl="urn:schemas-microsoft-com:xslt">

<head>

<META http-equiv="Content-Type" content="text/html">

<meta http-equiv="content-type" content="text/html; charset=UTF-8">

</head>

<body style="margin:0px 0px 0px 0px;overflow:auto;background:#FFFFFF;">

<table style="font-family:Arial,Verdana,Times;font-size:12px;text-align:left;width:100%;border-collapse:collapse;padding:3px 3px 3px 3px">

<tr style="text-align:center;font-weight:bold;background:#9CBCE2">

<td>301</td>

</tr>

<tr>

<td>

<table style="font-family:Arial,Verdana,Times;font-size:12px;text-align:left;width:100%;border-spacing:0px; padding:3px 3px 3px 3px">

<tr>

<td>FID</td>

<td>210</td>

</tr>

<tr bgcolor="#D4E4F3">

<td>F1_for_irr</td>

<td>0</td>

</tr>

<tr>

<td>Name</td>

<td>301</td>

</tr>

<tr bgcolor="#D4E4F3">

<td>Name_2</td>

<td>301</td>

</tr>

<tr>

<td>Name_1</td>

<td>301</td>

</tr>

<tr bgcolor="#D4E4F3">

<td>F1_for_i_1</td>

<td>0</td>

</tr>

<tr>

<td>notes</td>

<td>wheat</td>

</tr>

<tr bgcolor="#D4E4F3">

<td>new_number</td>

<td>2</td>

</tr>

<tr>

<td>elevation</td>

<td>1813</td>

</tr>

</table>

</td>

</tr>

</table>

</body>

</html>]]></description>
				<styleUrl>#IconStyle09</styleUrl>
				<Point>
					<coordinates>-111.7215997196513,43.41198932504739,0</coordinates>
				</Point>
			</Placemark>
			<Placemark id="ID_00211">
				<name>302</name>
				<Snippet maxLines="0"></Snippet>
				<description><![CDATA[<html xmlns:fo="http://www.w3.org/1999/XSL/Format" xmlns:msxsl="urn:schemas-microsoft-com:xslt">

<head>

<META http-equiv="Content-Type" content="text/html">

<meta http-equiv="content-type" content="text/html; charset=UTF-8">

</head>

<body style="margin:0px 0px 0px 0px;overflow:auto;background:#FFFFFF;">

<table style="font-family:Arial,Verdana,Times;font-size:12px;text-align:left;width:100%;border-collapse:collapse;padding:3px 3px 3px 3px">

<tr style="text-align:center;font-weight:bold;background:#9CBCE2">

<td>302</td>

</tr>

<tr>

<td>

<table style="font-family:Arial,Verdana,Times;font-size:12px;text-align:left;width:100%;border-spacing:0px; padding:3px 3px 3px 3px">

<tr>

<td>FID</td>

<td>211</td>

</tr>

<tr bgcolor="#D4E4F3">

<td>F1_for_irr</td>

<td>0</td>

</tr>

<tr>

<td>Name</td>

<td>302</td>

</tr>

<tr bgcolor="#D4E4F3">

<td>Name_2</td>

<td>302</td>

</tr>

<tr>

<td>Name_1</td>

<td>302</td>

</tr>

<tr bgcolor="#D4E4F3">

<td>F1_for_i_1</td>

<td>0</td>

</tr>

<tr>

<td>notes</td>

<td>wheat</td>

</tr>

<tr bgcolor="#D4E4F3">

<td>new_number</td>

<td>2</td>

</tr>

<tr>

<td>elevation</td>

<td>1713</td>

</tr>

</table>

</td>

</tr>

</table>

</body>

</html>]]></description>
				<styleUrl>#IconStyle09</styleUrl>
				<Point>
					<coordinates>-111.756467977715,43.48141256144061,0</coordinates>
				</Point>
			</Placemark>
			<Placemark id="ID_00212">
				<name>303</name>
				<Snippet maxLines="0"></Snippet>
				<description><![CDATA[<html xmlns:fo="http://www.w3.org/1999/XSL/Format" xmlns:msxsl="urn:schemas-microsoft-com:xslt">

<head>

<META http-equiv="Content-Type" content="text/html">

<meta http-equiv="content-type" content="text/html; charset=UTF-8">

</head>

<body style="margin:0px 0px 0px 0px;overflow:auto;background:#FFFFFF;">

<table style="font-family:Arial,Verdana,Times;font-size:12px;text-align:left;width:100%;border-collapse:collapse;padding:3px 3px 3px 3px">

<tr style="text-align:center;font-weight:bold;background:#9CBCE2">

<td>303</td>

</tr>

<tr>

<td>

<table style="font-family:Arial,Verdana,Times;font-size:12px;text-align:left;width:100%;border-spacing:0px; padding:3px 3px 3px 3px">

<tr>

<td>FID</td>

<td>212</td>

</tr>

<tr bgcolor="#D4E4F3">

<td>F1_for_irr</td>

<td>0</td>

</tr>

<tr>

<td>Name</td>

<td>303</td>

</tr>

<tr bgcolor="#D4E4F3">

<td>Name_2</td>

<td>303</td>

</tr>

<tr>

<td>Name_1</td>

<td>303</td>

</tr>

<tr bgcolor="#D4E4F3">

<td>F1_for_i_1</td>

<td>0</td>

</tr>

<tr>

<td>notes</td>

<td>wheat</td>

</tr>

<tr bgcolor="#D4E4F3">

<td>new_number</td>

<td>2</td>

</tr>

<tr>

<td>elevation</td>

<td>1758</td>

</tr>

</table>

</td>

</tr>

</table>

</body>

</html>]]></description>
				<styleUrl>#IconStyle09</styleUrl>
				<Point>
					<coordinates>-111.82276894603,43.46202766754288,0</coordinates>
				</Point>
			</Placemark>
			<Placemark id="ID_00213">
				<name>305</name>
				<Snippet maxLines="0"></Snippet>
				<description><![CDATA[<html xmlns:fo="http://www.w3.org/1999/XSL/Format" xmlns:msxsl="urn:schemas-microsoft-com:xslt">

<head>

<META http-equiv="Content-Type" content="text/html">

<meta http-equiv="content-type" content="text/html; charset=UTF-8">

</head>

<body style="margin:0px 0px 0px 0px;overflow:auto;background:#FFFFFF;">

<table style="font-family:Arial,Verdana,Times;font-size:12px;text-align:left;width:100%;border-collapse:collapse;padding:3px 3px 3px 3px">

<tr style="text-align:center;font-weight:bold;background:#9CBCE2">

<td>305</td>

</tr>

<tr>

<td>

<table style="font-family:Arial,Verdana,Times;font-size:12px;text-align:left;width:100%;border-spacing:0px; padding:3px 3px 3px 3px">

<tr>

<td>FID</td>

<td>213</td>

</tr>

<tr bgcolor="#D4E4F3">

<td>F1_for_irr</td>

<td>0</td>

</tr>

<tr>

<td>Name</td>

<td>305</td>

</tr>

<tr bgcolor="#D4E4F3">

<td>Name_2</td>

<td>305</td>

</tr>

<tr>

<td>Name_1</td>

<td>305</td>

</tr>

<tr bgcolor="#D4E4F3">

<td>F1_for_i_1</td>

<td>0</td>

</tr>

<tr>

<td>notes</td>

<td>wheat</td>

</tr>

<tr bgcolor="#D4E4F3">

<td>new_number</td>

<td>2</td>

</tr>

<tr>

<td>elevation</td>

<td>1696</td>

</tr>

</table>

</td>

</tr>

</table>

</body>

</html>]]></description>
				<styleUrl>#IconStyle09</styleUrl>
				<Point>
					<coordinates>-111.5695544979417,43.56350753234682,0</coordinates>
				</Point>
			</Placemark>
			<Placemark id="ID_00214">
				<name>306</name>
				<Snippet maxLines="0"></Snippet>
				<description><![CDATA[<html xmlns:fo="http://www.w3.org/1999/XSL/Format" xmlns:msxsl="urn:schemas-microsoft-com:xslt">

<head>

<META http-equiv="Content-Type" content="text/html">

<meta http-equiv="content-type" content="text/html; charset=UTF-8">

</head>

<body style="margin:0px 0px 0px 0px;overflow:auto;background:#FFFFFF;">

<table style="font-family:Arial,Verdana,Times;font-size:12px;text-align:left;width:100%;border-collapse:collapse;padding:3px 3px 3px 3px">

<tr style="text-align:center;font-weight:bold;background:#9CBCE2">

<td>306</td>

</tr>

<tr>

<td>

<table style="font-family:Arial,Verdana,Times;font-size:12px;text-align:left;width:100%;border-spacing:0px; padding:3px 3px 3px 3px">

<tr>

<td>FID</td>

<td>214</td>

</tr>

<tr bgcolor="#D4E4F3">

<td>F1_for_irr</td>

<td>0</td>

</tr>

<tr>

<td>Name</td>

<td>306</td>

</tr>

<tr bgcolor="#D4E4F3">

<td>Name_2</td>

<td>306</td>

</tr>

<tr>

<td>Name_1</td>

<td>306</td>

</tr>

<tr bgcolor="#D4E4F3">

<td>F1_for_i_1</td>

<td>0</td>

</tr>

<tr>

<td>notes</td>

<td>wheat</td>

</tr>

<tr bgcolor="#D4E4F3">

<td>new_number</td>

<td>2</td>

</tr>

<tr>

<td>elevation</td>

<td>1751</td>

</tr>

</table>

</td>

</tr>

</table>

</body>

</html>]]></description>
				<styleUrl>#IconStyle09</styleUrl>
				<Point>
					<coordinates>-111.8135514913083,43.46603750712529,0</coordinates>
				</Point>
			</Placemark>
			<Placemark id="ID_00215">
				<name>307</name>
				<Snippet maxLines="0"></Snippet>
				<description><![CDATA[<html xmlns:fo="http://www.w3.org/1999/XSL/Format" xmlns:msxsl="urn:schemas-microsoft-com:xslt">

<head>

<META http-equiv="Content-Type" content="text/html">

<meta http-equiv="content-type" content="text/html; charset=UTF-8">

</head>

<body style="margin:0px 0px 0px 0px;overflow:auto;background:#FFFFFF;">

<table style="font-family:Arial,Verdana,Times;font-size:12px;text-align:left;width:100%;border-collapse:collapse;padding:3px 3px 3px 3px">

<tr style="text-align:center;font-weight:bold;background:#9CBCE2">

<td>307</td>

</tr>

<tr>

<td>

<table style="font-family:Arial,Verdana,Times;font-size:12px;text-align:left;width:100%;border-spacing:0px; padding:3px 3px 3px 3px">

<tr>

<td>FID</td>

<td>215</td>

</tr>

<tr bgcolor="#D4E4F3">

<td>F1_for_irr</td>

<td>0</td>

</tr>

<tr>

<td>Name</td>

<td>307</td>

</tr>

<tr bgcolor="#D4E4F3">

<td>Name_2</td>

<td>307</td>

</tr>

<tr>

<td>Name_1</td>

<td>307</td>

</tr>

<tr bgcolor="#D4E4F3">

<td>F1_for_i_1</td>

<td>0</td>

</tr>

<tr>

<td>notes</td>

<td>wheat</td>

</tr>

<tr bgcolor="#D4E4F3">

<td>new_number</td>

<td>2</td>

</tr>

<tr>

<td>elevation</td>

<td>1841</td>

</tr>

</table>

</td>

</tr>

</table>

</body>

</html>]]></description>
				<styleUrl>#IconStyle09</styleUrl>
				<Point>
					<coordinates>-111.7967842100233,43.32816295055977,0</coordinates>
				</Point>
			</Placemark>
			<Placemark id="ID_00216">
				<name>308</name>
				<Snippet maxLines="0"></Snippet>
				<description><![CDATA[<html xmlns:fo="http://www.w3.org/1999/XSL/Format" xmlns:msxsl="urn:schemas-microsoft-com:xslt">

<head>

<META http-equiv="Content-Type" content="text/html">

<meta http-equiv="content-type" content="text/html; charset=UTF-8">

</head>

<body style="margin:0px 0px 0px 0px;overflow:auto;background:#FFFFFF;">

<table style="font-family:Arial,Verdana,Times;font-size:12px;text-align:left;width:100%;border-collapse:collapse;padding:3px 3px 3px 3px">

<tr style="text-align:center;font-weight:bold;background:#9CBCE2">

<td>308</td>

</tr>

<tr>

<td>

<table style="font-family:Arial,Verdana,Times;font-size:12px;text-align:left;width:100%;border-spacing:0px; padding:3px 3px 3px 3px">

<tr>

<td>FID</td>

<td>216</td>

</tr>

<tr bgcolor="#D4E4F3">

<td>F1_for_irr</td>

<td>0</td>

</tr>

<tr>

<td>Name</td>

<td>308</td>

</tr>

<tr bgcolor="#D4E4F3">

<td>Name_2</td>

<td>308</td>

</tr>

<tr>

<td>Name_1</td>

<td>308</td>

</tr>

<tr bgcolor="#D4E4F3">

<td>F1_for_i_1</td>

<td>0</td>

</tr>

<tr>

<td>notes</td>

<td>wheat</td>

</tr>

<tr bgcolor="#D4E4F3">

<td>new_number</td>

<td>2</td>

</tr>

<tr>

<td>elevation</td>

<td>1746</td>

</tr>

</table>

</td>

</tr>

</table>

</body>

</html>]]></description>
				<styleUrl>#IconStyle09</styleUrl>
				<Point>
					<coordinates>-111.7453780391651,43.44736804639825,0</coordinates>
				</Point>
			</Placemark>
			<Placemark id="ID_00217">
				<name>309</name>
				<Snippet maxLines="0"></Snippet>
				<description><![CDATA[<html xmlns:fo="http://www.w3.org/1999/XSL/Format" xmlns:msxsl="urn:schemas-microsoft-com:xslt">

<head>

<META http-equiv="Content-Type" content="text/html">

<meta http-equiv="content-type" content="text/html; charset=UTF-8">

</head>

<body style="margin:0px 0px 0px 0px;overflow:auto;background:#FFFFFF;">

<table style="font-family:Arial,Verdana,Times;font-size:12px;text-align:left;width:100%;border-collapse:collapse;padding:3px 3px 3px 3px">

<tr style="text-align:center;font-weight:bold;background:#9CBCE2">

<td>309</td>

</tr>

<tr>

<td>

<table style="font-family:Arial,Verdana,Times;font-size:12px;text-align:left;width:100%;border-spacing:0px; padding:3px 3px 3px 3px">

<tr>

<td>FID</td>

<td>217</td>

</tr>

<tr bgcolor="#D4E4F3">

<td>F1_for_irr</td>

<td>0</td>

</tr>

<tr>

<td>Name</td>

<td>309</td>

</tr>

<tr bgcolor="#D4E4F3">

<td>Name_2</td>

<td>309</td>

</tr>

<tr>

<td>Name_1</td>

<td>309</td>

</tr>

<tr bgcolor="#D4E4F3">

<td>F1_for_i_1</td>

<td>0</td>

</tr>

<tr>

<td>notes</td>

<td>wheat</td>

</tr>

<tr bgcolor="#D4E4F3">

<td>new_number</td>

<td>2</td>

</tr>

<tr>

<td>elevation</td>

<td>1750</td>

</tr>

</table>

</td>

</tr>

</table>

</body>

</html>]]></description>
				<styleUrl>#IconStyle09</styleUrl>
				<Point>
					<coordinates>-111.7990497416522,43.46317735095403,0</coordinates>
				</Point>
			</Placemark>
			<Placemark id="ID_00218">
				<name>310</name>
				<Snippet maxLines="0"></Snippet>
				<description><![CDATA[<html xmlns:fo="http://www.w3.org/1999/XSL/Format" xmlns:msxsl="urn:schemas-microsoft-com:xslt">

<head>

<META http-equiv="Content-Type" content="text/html">

<meta http-equiv="content-type" content="text/html; charset=UTF-8">

</head>

<body style="margin:0px 0px 0px 0px;overflow:auto;background:#FFFFFF;">

<table style="font-family:Arial,Verdana,Times;font-size:12px;text-align:left;width:100%;border-collapse:collapse;padding:3px 3px 3px 3px">

<tr style="text-align:center;font-weight:bold;background:#9CBCE2">

<td>310</td>

</tr>

<tr>

<td>

<table style="font-family:Arial,Verdana,Times;font-size:12px;text-align:left;width:100%;border-spacing:0px; padding:3px 3px 3px 3px">

<tr>

<td>FID</td>

<td>218</td>

</tr>

<tr bgcolor="#D4E4F3">

<td>F1_for_irr</td>

<td>1</td>

</tr>

<tr>

<td>Name</td>

<td>310</td>

</tr>

<tr bgcolor="#D4E4F3">

<td>Name_2</td>

<td>310</td>

</tr>

<tr>

<td>Name_1</td>

<td>310</td>

</tr>

<tr bgcolor="#D4E4F3">

<td>F1_for_i_1</td>

<td>1</td>

</tr>

<tr>

<td>notes</td>

<td></td>

</tr>

<tr bgcolor="#D4E4F3">

<td>new_number</td>

<td>1</td>

</tr>

<tr>

<td>elevation</td>

<td>1626</td>

</tr>

</table>

</td>

</tr>

</table>

</body>

</html>]]></description>
				<styleUrl>#IconStyle00</styleUrl>
				<Point>
					<coordinates>-113.3713414787262,43.59135214008927,0</coordinates>
				</Point>
			</Placemark>
			<Placemark id="ID_00219">
				<name>311</name>
				<Snippet maxLines="0"></Snippet>
				<description><![CDATA[<html xmlns:fo="http://www.w3.org/1999/XSL/Format" xmlns:msxsl="urn:schemas-microsoft-com:xslt">

<head>

<META http-equiv="Content-Type" content="text/html">

<meta http-equiv="content-type" content="text/html; charset=UTF-8">

</head>

<body style="margin:0px 0px 0px 0px;overflow:auto;background:#FFFFFF;">

<table style="font-family:Arial,Verdana,Times;font-size:12px;text-align:left;width:100%;border-collapse:collapse;padding:3px 3px 3px 3px">

<tr style="text-align:center;font-weight:bold;background:#9CBCE2">

<td>311</td>

</tr>

<tr>

<td>

<table style="font-family:Arial,Verdana,Times;font-size:12px;text-align:left;width:100%;border-spacing:0px; padding:3px 3px 3px 3px">

<tr>

<td>FID</td>

<td>219</td>

</tr>

<tr bgcolor="#D4E4F3">

<td>F1_for_irr</td>

<td>1</td>

</tr>

<tr>

<td>Name</td>

<td>311</td>

</tr>

<tr bgcolor="#D4E4F3">

<td>Name_2</td>

<td>311</td>

</tr>

<tr>

<td>Name_1</td>

<td>311</td>

</tr>

<tr bgcolor="#D4E4F3">

<td>F1_for_i_1</td>

<td>1</td>

</tr>

<tr>

<td>notes</td>

<td></td>

</tr>

<tr bgcolor="#D4E4F3">

<td>new_number</td>

<td>1</td>

</tr>

<tr>

<td>elevation</td>

<td>1653</td>

</tr>

</table>

</td>

</tr>

</table>

</body>

</html>]]></description>
				<styleUrl>#IconStyle00</styleUrl>
				<Point>
					<coordinates>-113.4514171721647,43.62129224464144,0</coordinates>
				</Point>
			</Placemark>
			<Placemark id="ID_00220">
				<name>312</name>
				<Snippet maxLines="0"></Snippet>
				<description><![CDATA[<html xmlns:fo="http://www.w3.org/1999/XSL/Format" xmlns:msxsl="urn:schemas-microsoft-com:xslt">

<head>

<META http-equiv="Content-Type" content="text/html">

<meta http-equiv="content-type" content="text/html; charset=UTF-8">

</head>

<body style="margin:0px 0px 0px 0px;overflow:auto;background:#FFFFFF;">

<table style="font-family:Arial,Verdana,Times;font-size:12px;text-align:left;width:100%;border-collapse:collapse;padding:3px 3px 3px 3px">

<tr style="text-align:center;font-weight:bold;background:#9CBCE2">

<td>312</td>

</tr>

<tr>

<td>

<table style="font-family:Arial,Verdana,Times;font-size:12px;text-align:left;width:100%;border-spacing:0px; padding:3px 3px 3px 3px">

<tr>

<td>FID</td>

<td>220</td>

</tr>

<tr bgcolor="#D4E4F3">

<td>F1_for_irr</td>

<td>1</td>

</tr>

<tr>

<td>Name</td>

<td>312</td>

</tr>

<tr bgcolor="#D4E4F3">

<td>Name_2</td>

<td>312</td>

</tr>

<tr>

<td>Name_1</td>

<td>312</td>

</tr>

<tr bgcolor="#D4E4F3">

<td>F1_for_i_1</td>

<td>1</td>

</tr>

<tr>

<td>notes</td>

<td></td>

</tr>

<tr bgcolor="#D4E4F3">

<td>new_number</td>

<td>1</td>

</tr>

<tr>

<td>elevation</td>

<td>1484</td>

</tr>

</table>

</td>

</tr>

</table>

</body>

</html>]]></description>
				<styleUrl>#IconStyle00</styleUrl>
				<Point>
					<coordinates>-113.0182541922771,43.81614989380262,0</coordinates>
				</Point>
			</Placemark>
			<Placemark id="ID_00221">
				<name>313</name>
				<Snippet maxLines="0"></Snippet>
				<description><![CDATA[<html xmlns:fo="http://www.w3.org/1999/XSL/Format" xmlns:msxsl="urn:schemas-microsoft-com:xslt">

<head>

<META http-equiv="Content-Type" content="text/html">

<meta http-equiv="content-type" content="text/html; charset=UTF-8">

</head>

<body style="margin:0px 0px 0px 0px;overflow:auto;background:#FFFFFF;">

<table style="font-family:Arial,Verdana,Times;font-size:12px;text-align:left;width:100%;border-collapse:collapse;padding:3px 3px 3px 3px">

<tr style="text-align:center;font-weight:bold;background:#9CBCE2">

<td>313</td>

</tr>

<tr>

<td>

<table style="font-family:Arial,Verdana,Times;font-size:12px;text-align:left;width:100%;border-spacing:0px; padding:3px 3px 3px 3px">

<tr>

<td>FID</td>

<td>221</td>

</tr>

<tr bgcolor="#D4E4F3">

<td>F1_for_irr</td>

<td>1</td>

</tr>

<tr>

<td>Name</td>

<td>313</td>

</tr>

<tr bgcolor="#D4E4F3">

<td>Name_2</td>

<td>313</td>

</tr>

<tr>

<td>Name_1</td>

<td>313</td>

</tr>

<tr bgcolor="#D4E4F3">

<td>F1_for_i_1</td>

<td>1</td>

</tr>

<tr>

<td>notes</td>

<td></td>

</tr>

<tr bgcolor="#D4E4F3">

<td>new_number</td>

<td>1</td>

</tr>

<tr>

<td>elevation</td>

<td>1459</td>

</tr>

</table>

</td>

</tr>

</table>

</body>

</html>]]></description>
				<styleUrl>#IconStyle00</styleUrl>
				<Point>
					<coordinates>-112.9384763372132,43.80846481549889,0</coordinates>
				</Point>
			</Placemark>
			<Placemark id="ID_00222">
				<name>314</name>
				<Snippet maxLines="0"></Snippet>
				<description><![CDATA[<html xmlns:fo="http://www.w3.org/1999/XSL/Format" xmlns:msxsl="urn:schemas-microsoft-com:xslt">

<head>

<META http-equiv="Content-Type" content="text/html">

<meta http-equiv="content-type" content="text/html; charset=UTF-8">

</head>

<body style="margin:0px 0px 0px 0px;overflow:auto;background:#FFFFFF;">

<table style="font-family:Arial,Verdana,Times;font-size:12px;text-align:left;width:100%;border-collapse:collapse;padding:3px 3px 3px 3px">

<tr style="text-align:center;font-weight:bold;background:#9CBCE2">

<td>314</td>

</tr>

<tr>

<td>

<table style="font-family:Arial,Verdana,Times;font-size:12px;text-align:left;width:100%;border-spacing:0px; padding:3px 3px 3px 3px">

<tr>

<td>FID</td>

<td>222</td>

</tr>

<tr bgcolor="#D4E4F3">

<td>F1_for_irr</td>

<td>1</td>

</tr>

<tr>

<td>Name</td>

<td>314</td>

</tr>

<tr bgcolor="#D4E4F3">

<td>Name_2</td>

<td>314</td>

</tr>

<tr>

<td>Name_1</td>

<td>314</td>

</tr>

<tr bgcolor="#D4E4F3">

<td>F1_for_i_1</td>

<td>1</td>

</tr>

<tr>

<td>notes</td>

<td></td>

</tr>

<tr bgcolor="#D4E4F3">

<td>new_number</td>

<td>1</td>

</tr>

<tr>

<td>elevation</td>

<td>1462</td>

</tr>

</table>

</td>

</tr>

</table>

</body>

</html>]]></description>
				<styleUrl>#IconStyle00</styleUrl>
				<Point>
					<coordinates>-112.9188465597209,43.79336401843477,0</coordinates>
				</Point>
			</Placemark>
			<Placemark id="ID_00223">
				<name>315</name>
				<Snippet maxLines="0"></Snippet>
				<description><![CDATA[<html xmlns:fo="http://www.w3.org/1999/XSL/Format" xmlns:msxsl="urn:schemas-microsoft-com:xslt">

<head>

<META http-equiv="Content-Type" content="text/html">

<meta http-equiv="content-type" content="text/html; charset=UTF-8">

</head>

<body style="margin:0px 0px 0px 0px;overflow:auto;background:#FFFFFF;">

<table style="font-family:Arial,Verdana,Times;font-size:12px;text-align:left;width:100%;border-collapse:collapse;padding:3px 3px 3px 3px">

<tr style="text-align:center;font-weight:bold;background:#9CBCE2">

<td>315</td>

</tr>

<tr>

<td>

<table style="font-family:Arial,Verdana,Times;font-size:12px;text-align:left;width:100%;border-spacing:0px; padding:3px 3px 3px 3px">

<tr>

<td>FID</td>

<td>223</td>

</tr>

<tr bgcolor="#D4E4F3">

<td>F1_for_irr</td>

<td>1</td>

</tr>

<tr>

<td>Name</td>

<td>315</td>

</tr>

<tr bgcolor="#D4E4F3">

<td>Name_2</td>

<td>315</td>

</tr>

<tr>

<td>Name_1</td>

<td>315</td>

</tr>

<tr bgcolor="#D4E4F3">

<td>F1_for_i_1</td>

<td>1</td>

</tr>

<tr>

<td>notes</td>

<td></td>

</tr>

<tr bgcolor="#D4E4F3">

<td>new_number</td>

<td>1</td>

</tr>

<tr>

<td>elevation</td>

<td>1700</td>

</tr>

</table>

</td>

</tr>

</table>

</body>

</html>]]></description>
				<styleUrl>#IconStyle00</styleUrl>
				<Point>
					<coordinates>-113.2185776114675,44.03481823537334,0</coordinates>
				</Point>
			</Placemark>
			<Placemark id="ID_00224">
				<name>316</name>
				<Snippet maxLines="0"></Snippet>
				<description><![CDATA[<html xmlns:fo="http://www.w3.org/1999/XSL/Format" xmlns:msxsl="urn:schemas-microsoft-com:xslt">

<head>

<META http-equiv="Content-Type" content="text/html">

<meta http-equiv="content-type" content="text/html; charset=UTF-8">

</head>

<body style="margin:0px 0px 0px 0px;overflow:auto;background:#FFFFFF;">

<table style="font-family:Arial,Verdana,Times;font-size:12px;text-align:left;width:100%;border-collapse:collapse;padding:3px 3px 3px 3px">

<tr style="text-align:center;font-weight:bold;background:#9CBCE2">

<td>316</td>

</tr>

<tr>

<td>

<table style="font-family:Arial,Verdana,Times;font-size:12px;text-align:left;width:100%;border-spacing:0px; padding:3px 3px 3px 3px">

<tr>

<td>FID</td>

<td>224</td>

</tr>

<tr bgcolor="#D4E4F3">

<td>F1_for_irr</td>

<td>1</td>

</tr>

<tr>

<td>Name</td>

<td>316</td>

</tr>

<tr bgcolor="#D4E4F3">

<td>Name_2</td>

<td>316</td>

</tr>

<tr>

<td>Name_1</td>

<td>316</td>

</tr>

<tr bgcolor="#D4E4F3">

<td>F1_for_i_1</td>

<td>1</td>

</tr>

<tr>

<td>notes</td>

<td></td>

</tr>

<tr bgcolor="#D4E4F3">

<td>new_number</td>

<td>1</td>

</tr>

<tr>

<td>elevation</td>

<td>1460</td>

</tr>

</table>

</td>

</tr>

</table>

</body>

</html>]]></description>
				<styleUrl>#IconStyle00</styleUrl>
				<Point>
					<coordinates>-112.9189292352959,43.80875879488252,0</coordinates>
				</Point>
			</Placemark>
			<Placemark id="ID_00225">
				<name>317</name>
				<Snippet maxLines="0"></Snippet>
				<description><![CDATA[<html xmlns:fo="http://www.w3.org/1999/XSL/Format" xmlns:msxsl="urn:schemas-microsoft-com:xslt">

<head>

<META http-equiv="Content-Type" content="text/html">

<meta http-equiv="content-type" content="text/html; charset=UTF-8">

</head>

<body style="margin:0px 0px 0px 0px;overflow:auto;background:#FFFFFF;">

<table style="font-family:Arial,Verdana,Times;font-size:12px;text-align:left;width:100%;border-collapse:collapse;padding:3px 3px 3px 3px">

<tr style="text-align:center;font-weight:bold;background:#9CBCE2">

<td>317</td>

</tr>

<tr>

<td>

<table style="font-family:Arial,Verdana,Times;font-size:12px;text-align:left;width:100%;border-spacing:0px; padding:3px 3px 3px 3px">

<tr>

<td>FID</td>

<td>225</td>

</tr>

<tr bgcolor="#D4E4F3">

<td>F1_for_irr</td>

<td>1</td>

</tr>

<tr>

<td>Name</td>

<td>317</td>

</tr>

<tr bgcolor="#D4E4F3">

<td>Name_2</td>

<td>317</td>

</tr>

<tr>

<td>Name_1</td>

<td>317</td>

</tr>

<tr bgcolor="#D4E4F3">

<td>F1_for_i_1</td>

<td>1</td>

</tr>

<tr>

<td>notes</td>

<td></td>

</tr>

<tr bgcolor="#D4E4F3">

<td>new_number</td>

<td>1</td>

</tr>

<tr>

<td>elevation</td>

<td>1618</td>

</tr>

</table>

</td>

</tr>

</table>

</body>

</html>]]></description>
				<styleUrl>#IconStyle00</styleUrl>
				<Point>
					<coordinates>-113.1647487686407,43.96134913975106,0</coordinates>
				</Point>
			</Placemark>
			<Placemark id="ID_00226">
				<name>318</name>
				<Snippet maxLines="0"></Snippet>
				<description><![CDATA[<html xmlns:fo="http://www.w3.org/1999/XSL/Format" xmlns:msxsl="urn:schemas-microsoft-com:xslt">

<head>

<META http-equiv="Content-Type" content="text/html">

<meta http-equiv="content-type" content="text/html; charset=UTF-8">

</head>

<body style="margin:0px 0px 0px 0px;overflow:auto;background:#FFFFFF;">

<table style="font-family:Arial,Verdana,Times;font-size:12px;text-align:left;width:100%;border-collapse:collapse;padding:3px 3px 3px 3px">

<tr style="text-align:center;font-weight:bold;background:#9CBCE2">

<td>318</td>

</tr>

<tr>

<td>

<table style="font-family:Arial,Verdana,Times;font-size:12px;text-align:left;width:100%;border-spacing:0px; padding:3px 3px 3px 3px">

<tr>

<td>FID</td>

<td>226</td>

</tr>

<tr bgcolor="#D4E4F3">

<td>F1_for_irr</td>

<td>1</td>

</tr>

<tr>

<td>Name</td>

<td>318</td>

</tr>

<tr bgcolor="#D4E4F3">

<td>Name_2</td>

<td>318</td>

</tr>

<tr>

<td>Name_1</td>

<td>318</td>

</tr>

<tr bgcolor="#D4E4F3">

<td>F1_for_i_1</td>

<td>1</td>

</tr>

<tr>

<td>notes</td>

<td></td>

</tr>

<tr bgcolor="#D4E4F3">

<td>new_number</td>

<td>1</td>

</tr>

<tr>

<td>elevation</td>

<td>1644</td>

</tr>

</table>

</td>

</tr>

</table>

</body>

</html>]]></description>
				<styleUrl>#IconStyle00</styleUrl>
				<Point>
					<coordinates>-113.1599630614461,43.99746196959427,0</coordinates>
				</Point>
			</Placemark>
			<Placemark id="ID_00227">
				<name>319</name>
				<Snippet maxLines="0"></Snippet>
				<description><![CDATA[<html xmlns:fo="http://www.w3.org/1999/XSL/Format" xmlns:msxsl="urn:schemas-microsoft-com:xslt">

<head>

<META http-equiv="Content-Type" content="text/html">

<meta http-equiv="content-type" content="text/html; charset=UTF-8">

</head>

<body style="margin:0px 0px 0px 0px;overflow:auto;background:#FFFFFF;">

<table style="font-family:Arial,Verdana,Times;font-size:12px;text-align:left;width:100%;border-collapse:collapse;padding:3px 3px 3px 3px">

<tr style="text-align:center;font-weight:bold;background:#9CBCE2">

<td>319</td>

</tr>

<tr>

<td>

<table style="font-family:Arial,Verdana,Times;font-size:12px;text-align:left;width:100%;border-spacing:0px; padding:3px 3px 3px 3px">

<tr>

<td>FID</td>

<td>227</td>

</tr>

<tr bgcolor="#D4E4F3">

<td>F1_for_irr</td>

<td>1</td>

</tr>

<tr>

<td>Name</td>

<td>319</td>

</tr>

<tr bgcolor="#D4E4F3">

<td>Name_2</td>

<td>319</td>

</tr>

<tr>

<td>Name_1</td>

<td>319</td>

</tr>

<tr bgcolor="#D4E4F3">

<td>F1_for_i_1</td>

<td>1</td>

</tr>

<tr>

<td>notes</td>

<td></td>

</tr>

<tr bgcolor="#D4E4F3">

<td>new_number</td>

<td>1</td>

</tr>

<tr>

<td>elevation</td>

<td>1656</td>

</tr>

</table>

</td>

</tr>

</table>

</body>

</html>]]></description>
				<styleUrl>#IconStyle00</styleUrl>
				<Point>
					<coordinates>-113.343977805931,43.70545341064644,0</coordinates>
				</Point>
			</Placemark>
			<Placemark id="ID_00228">
				<name>321</name>
				<Snippet maxLines="0"></Snippet>
				<description><![CDATA[<html xmlns:fo="http://www.w3.org/1999/XSL/Format" xmlns:msxsl="urn:schemas-microsoft-com:xslt">

<head>

<META http-equiv="Content-Type" content="text/html">

<meta http-equiv="content-type" content="text/html; charset=UTF-8">

</head>

<body style="margin:0px 0px 0px 0px;overflow:auto;background:#FFFFFF;">

<table style="font-family:Arial,Verdana,Times;font-size:12px;text-align:left;width:100%;border-collapse:collapse;padding:3px 3px 3px 3px">

<tr style="text-align:center;font-weight:bold;background:#9CBCE2">

<td>321</td>

</tr>

<tr>

<td>

<table style="font-family:Arial,Verdana,Times;font-size:12px;text-align:left;width:100%;border-spacing:0px; padding:3px 3px 3px 3px">

<tr>

<td>FID</td>

<td>228</td>

</tr>

<tr bgcolor="#D4E4F3">

<td>F1_for_irr</td>

<td>0</td>

</tr>

<tr>

<td>Name</td>

<td>321</td>

</tr>

<tr bgcolor="#D4E4F3">

<td>Name_2</td>

<td>321</td>

</tr>

<tr>

<td>Name_1</td>

<td>321</td>

</tr>

<tr bgcolor="#D4E4F3">

<td>F1_for_i_1</td>

<td>0</td>

</tr>

<tr>

<td>notes</td>

<td></td>

</tr>

<tr bgcolor="#D4E4F3">

<td>new_number</td>

<td>2</td>

</tr>

<tr>

<td>elevation</td>

<td>1622</td>

</tr>

</table>

</td>

</tr>

</table>

</body>

</html>]]></description>
				<styleUrl>#IconStyle09</styleUrl>
				<Point>
					<coordinates>-113.2255278069627,43.60314494108621,0</coordinates>
				</Point>
			</Placemark>
			<Placemark id="ID_00229">
				<name>323</name>
				<Snippet maxLines="0"></Snippet>
				<description><![CDATA[<html xmlns:fo="http://www.w3.org/1999/XSL/Format" xmlns:msxsl="urn:schemas-microsoft-com:xslt">

<head>

<META http-equiv="Content-Type" content="text/html">

<meta http-equiv="content-type" content="text/html; charset=UTF-8">

</head>

<body style="margin:0px 0px 0px 0px;overflow:auto;background:#FFFFFF;">

<table style="font-family:Arial,Verdana,Times;font-size:12px;text-align:left;width:100%;border-collapse:collapse;padding:3px 3px 3px 3px">

<tr style="text-align:center;font-weight:bold;background:#9CBCE2">

<td>323</td>

</tr>

<tr>

<td>

<table style="font-family:Arial,Verdana,Times;font-size:12px;text-align:left;width:100%;border-spacing:0px; padding:3px 3px 3px 3px">

<tr>

<td>FID</td>

<td>229</td>

</tr>

<tr bgcolor="#D4E4F3">

<td>F1_for_irr</td>

<td>0</td>

</tr>

<tr>

<td>Name</td>

<td>323</td>

</tr>

<tr bgcolor="#D4E4F3">

<td>Name_2</td>

<td>323</td>

</tr>

<tr>

<td>Name_1</td>

<td>323</td>

</tr>

<tr bgcolor="#D4E4F3">

<td>F1_for_i_1</td>

<td>0</td>

</tr>

<tr>

<td>notes</td>

<td>pasture</td>

</tr>

<tr bgcolor="#D4E4F3">

<td>new_number</td>

<td>2</td>

</tr>

<tr>

<td>elevation</td>

<td>1612</td>

</tr>

</table>

</td>

</tr>

</table>

</body>

</html>]]></description>
				<styleUrl>#IconStyle09</styleUrl>
				<Point>
					<coordinates>-113.2807240770545,43.60769291879325,0</coordinates>
				</Point>
			</Placemark>
			<Placemark id="ID_00230">
				<name>324</name>
				<Snippet maxLines="0"></Snippet>
				<description><![CDATA[<html xmlns:fo="http://www.w3.org/1999/XSL/Format" xmlns:msxsl="urn:schemas-microsoft-com:xslt">

<head>

<META http-equiv="Content-Type" content="text/html">

<meta http-equiv="content-type" content="text/html; charset=UTF-8">

</head>

<body style="margin:0px 0px 0px 0px;overflow:auto;background:#FFFFFF;">

<table style="font-family:Arial,Verdana,Times;font-size:12px;text-align:left;width:100%;border-collapse:collapse;padding:3px 3px 3px 3px">

<tr style="text-align:center;font-weight:bold;background:#9CBCE2">

<td>324</td>

</tr>

<tr>

<td>

<table style="font-family:Arial,Verdana,Times;font-size:12px;text-align:left;width:100%;border-spacing:0px; padding:3px 3px 3px 3px">

<tr>

<td>FID</td>

<td>230</td>

</tr>

<tr bgcolor="#D4E4F3">

<td>F1_for_irr</td>

<td>0</td>

</tr>

<tr>

<td>Name</td>

<td>324</td>

</tr>

<tr bgcolor="#D4E4F3">

<td>Name_2</td>

<td>324</td>

</tr>

<tr>

<td>Name_1</td>

<td>324</td>

</tr>

<tr bgcolor="#D4E4F3">

<td>F1_for_i_1</td>

<td>0</td>

</tr>

<tr>

<td>notes</td>

<td>wheat</td>

</tr>

<tr bgcolor="#D4E4F3">

<td>new_number</td>

<td>2</td>

</tr>

<tr>

<td>elevation</td>

<td>1621</td>

</tr>

</table>

</td>

</tr>

</table>

</body>

</html>]]></description>
				<styleUrl>#IconStyle09</styleUrl>
				<Point>
					<coordinates>-113.2841736201165,43.62221911202244,0</coordinates>
				</Point>
			</Placemark>
			<Placemark id="ID_00231">
				<name>326</name>
				<Snippet maxLines="0"></Snippet>
				<description><![CDATA[<html xmlns:fo="http://www.w3.org/1999/XSL/Format" xmlns:msxsl="urn:schemas-microsoft-com:xslt">

<head>

<META http-equiv="Content-Type" content="text/html">

<meta http-equiv="content-type" content="text/html; charset=UTF-8">

</head>

<body style="margin:0px 0px 0px 0px;overflow:auto;background:#FFFFFF;">

<table style="font-family:Arial,Verdana,Times;font-size:12px;text-align:left;width:100%;border-collapse:collapse;padding:3px 3px 3px 3px">

<tr style="text-align:center;font-weight:bold;background:#9CBCE2">

<td>326</td>

</tr>

<tr>

<td>

<table style="font-family:Arial,Verdana,Times;font-size:12px;text-align:left;width:100%;border-spacing:0px; padding:3px 3px 3px 3px">

<tr>

<td>FID</td>

<td>231</td>

</tr>

<tr bgcolor="#D4E4F3">

<td>F1_for_irr</td>

<td>0</td>

</tr>

<tr>

<td>Name</td>

<td>326</td>

</tr>

<tr bgcolor="#D4E4F3">

<td>Name_2</td>

<td>326</td>

</tr>

<tr>

<td>Name_1</td>

<td>326</td>

</tr>

<tr bgcolor="#D4E4F3">

<td>F1_for_i_1</td>

<td>0</td>

</tr>

<tr>

<td>notes</td>

<td></td>

</tr>

<tr bgcolor="#D4E4F3">

<td>new_number</td>

<td>0</td>

</tr>

<tr>

<td>elevation</td>

<td>1673</td>

</tr>

</table>

</td>

</tr>

</table>

</body>

</html>]]></description>
				<styleUrl>#IconStyle09</styleUrl>
				<Point>
					<coordinates>-113.47550260656,43.59845272201557,0</coordinates>
				</Point>
			</Placemark>
			<Placemark id="ID_00232">
				<name>327</name>
				<Snippet maxLines="0"></Snippet>
				<description><![CDATA[<html xmlns:fo="http://www.w3.org/1999/XSL/Format" xmlns:msxsl="urn:schemas-microsoft-com:xslt">

<head>

<META http-equiv="Content-Type" content="text/html">

<meta http-equiv="content-type" content="text/html; charset=UTF-8">

</head>

<body style="margin:0px 0px 0px 0px;overflow:auto;background:#FFFFFF;">

<table style="font-family:Arial,Verdana,Times;font-size:12px;text-align:left;width:100%;border-collapse:collapse;padding:3px 3px 3px 3px">

<tr style="text-align:center;font-weight:bold;background:#9CBCE2">

<td>327</td>

</tr>

<tr>

<td>

<table style="font-family:Arial,Verdana,Times;font-size:12px;text-align:left;width:100%;border-spacing:0px; padding:3px 3px 3px 3px">

<tr>

<td>FID</td>

<td>232</td>

</tr>

<tr bgcolor="#D4E4F3">

<td>F1_for_irr</td>

<td>0</td>

</tr>

<tr>

<td>Name</td>

<td>327</td>

</tr>

<tr bgcolor="#D4E4F3">

<td>Name_2</td>

<td>327</td>

</tr>

<tr>

<td>Name_1</td>

<td>327</td>

</tr>

<tr bgcolor="#D4E4F3">

<td>F1_for_i_1</td>

<td>0</td>

</tr>

<tr>

<td>notes</td>

<td></td>

</tr>

<tr bgcolor="#D4E4F3">

<td>new_number</td>

<td>0</td>

</tr>

<tr>

<td>elevation</td>

<td>1804</td>

</tr>

</table>

</td>

</tr>

</table>

</body>

</html>]]></description>
				<styleUrl>#IconStyle09</styleUrl>
				<Point>
					<coordinates>-113.2668354060291,44.12141716217235,0</coordinates>
				</Point>
			</Placemark>
			<Placemark id="ID_00233">
				<name>328</name>
				<Snippet maxLines="0"></Snippet>
				<description><![CDATA[<html xmlns:fo="http://www.w3.org/1999/XSL/Format" xmlns:msxsl="urn:schemas-microsoft-com:xslt">

<head>

<META http-equiv="Content-Type" content="text/html">

<meta http-equiv="content-type" content="text/html; charset=UTF-8">

</head>

<body style="margin:0px 0px 0px 0px;overflow:auto;background:#FFFFFF;">

<table style="font-family:Arial,Verdana,Times;font-size:12px;text-align:left;width:100%;border-collapse:collapse;padding:3px 3px 3px 3px">

<tr style="text-align:center;font-weight:bold;background:#9CBCE2">

<td>328</td>

</tr>

<tr>

<td>

<table style="font-family:Arial,Verdana,Times;font-size:12px;text-align:left;width:100%;border-spacing:0px; padding:3px 3px 3px 3px">

<tr>

<td>FID</td>

<td>233</td>

</tr>

<tr bgcolor="#D4E4F3">

<td>F1_for_irr</td>

<td>0</td>

</tr>

<tr>

<td>Name</td>

<td>328</td>

</tr>

<tr bgcolor="#D4E4F3">

<td>Name_2</td>

<td>328</td>

</tr>

<tr>

<td>Name_1</td>

<td>328</td>

</tr>

<tr bgcolor="#D4E4F3">

<td>F1_for_i_1</td>

<td>0</td>

</tr>

<tr>

<td>notes</td>

<td>pasture</td>

</tr>

<tr bgcolor="#D4E4F3">

<td>new_number</td>

<td>2</td>

</tr>

<tr>

<td>elevation</td>

<td>1550</td>

</tr>

</table>

</td>

</tr>

</table>

</body>

</html>]]></description>
				<styleUrl>#IconStyle09</styleUrl>
				<Point>
					<coordinates>-113.0959302543777,43.83035431320104,0</coordinates>
				</Point>
			</Placemark>
			<Placemark id="ID_00234">
				<name>329</name>
				<Snippet maxLines="0"></Snippet>
				<description><![CDATA[<html xmlns:fo="http://www.w3.org/1999/XSL/Format" xmlns:msxsl="urn:schemas-microsoft-com:xslt">

<head>

<META http-equiv="Content-Type" content="text/html">

<meta http-equiv="content-type" content="text/html; charset=UTF-8">

</head>

<body style="margin:0px 0px 0px 0px;overflow:auto;background:#FFFFFF;">

<table style="font-family:Arial,Verdana,Times;font-size:12px;text-align:left;width:100%;border-collapse:collapse;padding:3px 3px 3px 3px">

<tr style="text-align:center;font-weight:bold;background:#9CBCE2">

<td>329</td>

</tr>

<tr>

<td>

<table style="font-family:Arial,Verdana,Times;font-size:12px;text-align:left;width:100%;border-spacing:0px; padding:3px 3px 3px 3px">

<tr>

<td>FID</td>

<td>234</td>

</tr>

<tr bgcolor="#D4E4F3">

<td>F1_for_irr</td>

<td>0</td>

</tr>

<tr>

<td>Name</td>

<td>329</td>

</tr>

<tr bgcolor="#D4E4F3">

<td>Name_2</td>

<td>329</td>

</tr>

<tr>

<td>Name_1</td>

<td>329</td>

</tr>

<tr bgcolor="#D4E4F3">

<td>F1_for_i_1</td>

<td>0</td>

</tr>

<tr>

<td>notes</td>

<td>pasture</td>

</tr>

<tr bgcolor="#D4E4F3">

<td>new_number</td>

<td>2</td>

</tr>

<tr>

<td>elevation</td>

<td>1887</td>

</tr>

</table>

</td>

</tr>

</table>

</body>

</html>]]></description>
				<styleUrl>#IconStyle09</styleUrl>
				<Point>
					<coordinates>-113.6109757853042,43.67998108136186,0</coordinates>
				</Point>
			</Placemark>
			<Placemark id="ID_00235">
				<name>330</name>
				<Snippet maxLines="0"></Snippet>
				<description><![CDATA[<html xmlns:fo="http://www.w3.org/1999/XSL/Format" xmlns:msxsl="urn:schemas-microsoft-com:xslt">

<head>

<META http-equiv="Content-Type" content="text/html">

<meta http-equiv="content-type" content="text/html; charset=UTF-8">

</head>

<body style="margin:0px 0px 0px 0px;overflow:auto;background:#FFFFFF;">

<table style="font-family:Arial,Verdana,Times;font-size:12px;text-align:left;width:100%;border-collapse:collapse;padding:3px 3px 3px 3px">

<tr style="text-align:center;font-weight:bold;background:#9CBCE2">

<td>330</td>

</tr>

<tr>

<td>

<table style="font-family:Arial,Verdana,Times;font-size:12px;text-align:left;width:100%;border-spacing:0px; padding:3px 3px 3px 3px">

<tr>

<td>FID</td>

<td>235</td>

</tr>

<tr bgcolor="#D4E4F3">

<td>F1_for_irr</td>

<td>1</td>

</tr>

<tr>

<td>Name</td>

<td>330</td>

</tr>

<tr bgcolor="#D4E4F3">

<td>Name_2</td>

<td>330</td>

</tr>

<tr>

<td>Name_1</td>

<td>330</td>

</tr>

<tr bgcolor="#D4E4F3">

<td>F1_for_i_1</td>

<td>1</td>

</tr>

<tr>

<td>notes</td>

<td></td>

</tr>

<tr bgcolor="#D4E4F3">

<td>new_number</td>

<td>1</td>

</tr>

<tr>

<td>elevation</td>

<td>1339</td>

</tr>

</table>

</td>

</tr>

</table>

</body>

</html>]]></description>
				<styleUrl>#IconStyle00</styleUrl>
				<Point>
					<coordinates>-113.3091177919525,42.49895696689055,0</coordinates>
				</Point>
			</Placemark>
			<Placemark id="ID_00236">
				<name>331</name>
				<Snippet maxLines="0"></Snippet>
				<description><![CDATA[<html xmlns:fo="http://www.w3.org/1999/XSL/Format" xmlns:msxsl="urn:schemas-microsoft-com:xslt">

<head>

<META http-equiv="Content-Type" content="text/html">

<meta http-equiv="content-type" content="text/html; charset=UTF-8">

</head>

<body style="margin:0px 0px 0px 0px;overflow:auto;background:#FFFFFF;">

<table style="font-family:Arial,Verdana,Times;font-size:12px;text-align:left;width:100%;border-collapse:collapse;padding:3px 3px 3px 3px">

<tr style="text-align:center;font-weight:bold;background:#9CBCE2">

<td>331</td>

</tr>

<tr>

<td>

<table style="font-family:Arial,Verdana,Times;font-size:12px;text-align:left;width:100%;border-spacing:0px; padding:3px 3px 3px 3px">

<tr>

<td>FID</td>

<td>236</td>

</tr>

<tr bgcolor="#D4E4F3">

<td>F1_for_irr</td>

<td>1</td>

</tr>

<tr>

<td>Name</td>

<td>331</td>

</tr>

<tr bgcolor="#D4E4F3">

<td>Name_2</td>

<td>331</td>

</tr>

<tr>

<td>Name_1</td>

<td>331</td>

</tr>

<tr bgcolor="#D4E4F3">

<td>F1_for_i_1</td>

<td>1</td>

</tr>

<tr>

<td>notes</td>

<td></td>

</tr>

<tr bgcolor="#D4E4F3">

<td>new_number</td>

<td>1</td>

</tr>

<tr>

<td>elevation</td>

<td>1289</td>

</tr>

</table>

</td>

</tr>

</table>

</body>

</html>]]></description>
				<styleUrl>#IconStyle00</styleUrl>
				<Point>
					<coordinates>-113.5661118046161,42.59441602438005,0</coordinates>
				</Point>
			</Placemark>
			<Placemark id="ID_00237">
				<name>332</name>
				<Snippet maxLines="0"></Snippet>
				<description><![CDATA[<html xmlns:fo="http://www.w3.org/1999/XSL/Format" xmlns:msxsl="urn:schemas-microsoft-com:xslt">

<head>

<META http-equiv="Content-Type" content="text/html">

<meta http-equiv="content-type" content="text/html; charset=UTF-8">

</head>

<body style="margin:0px 0px 0px 0px;overflow:auto;background:#FFFFFF;">

<table style="font-family:Arial,Verdana,Times;font-size:12px;text-align:left;width:100%;border-collapse:collapse;padding:3px 3px 3px 3px">

<tr style="text-align:center;font-weight:bold;background:#9CBCE2">

<td>332</td>

</tr>

<tr>

<td>

<table style="font-family:Arial,Verdana,Times;font-size:12px;text-align:left;width:100%;border-spacing:0px; padding:3px 3px 3px 3px">

<tr>

<td>FID</td>

<td>237</td>

</tr>

<tr bgcolor="#D4E4F3">

<td>F1_for_irr</td>

<td>1</td>

</tr>

<tr>

<td>Name</td>

<td>332</td>

</tr>

<tr bgcolor="#D4E4F3">

<td>Name_2</td>

<td>332</td>

</tr>

<tr>

<td>Name_1</td>

<td>332</td>

</tr>

<tr bgcolor="#D4E4F3">

<td>F1_for_i_1</td>

<td>1</td>

</tr>

<tr>

<td>notes</td>

<td></td>

</tr>

<tr bgcolor="#D4E4F3">

<td>new_number</td>

<td>1</td>

</tr>

<tr>

<td>elevation</td>

<td>1326</td>

</tr>

</table>

</td>

</tr>

</table>

</body>

</html>]]></description>
				<styleUrl>#IconStyle00</styleUrl>
				<Point>
					<coordinates>-113.5292946877996,42.51368564157917,0</coordinates>
				</Point>
			</Placemark>
			<Placemark id="ID_00238">
				<name>333</name>
				<Snippet maxLines="0"></Snippet>
				<description><![CDATA[<html xmlns:fo="http://www.w3.org/1999/XSL/Format" xmlns:msxsl="urn:schemas-microsoft-com:xslt">

<head>

<META http-equiv="Content-Type" content="text/html">

<meta http-equiv="content-type" content="text/html; charset=UTF-8">

</head>

<body style="margin:0px 0px 0px 0px;overflow:auto;background:#FFFFFF;">

<table style="font-family:Arial,Verdana,Times;font-size:12px;text-align:left;width:100%;border-collapse:collapse;padding:3px 3px 3px 3px">

<tr style="text-align:center;font-weight:bold;background:#9CBCE2">

<td>333</td>

</tr>

<tr>

<td>

<table style="font-family:Arial,Verdana,Times;font-size:12px;text-align:left;width:100%;border-spacing:0px; padding:3px 3px 3px 3px">

<tr>

<td>FID</td>

<td>238</td>

</tr>

<tr bgcolor="#D4E4F3">

<td>F1_for_irr</td>

<td>1</td>

</tr>

<tr>

<td>Name</td>

<td>333</td>

</tr>

<tr bgcolor="#D4E4F3">

<td>Name_2</td>

<td>333</td>

</tr>

<tr>

<td>Name_1</td>

<td>333</td>

</tr>

<tr bgcolor="#D4E4F3">

<td>F1_for_i_1</td>

<td>1</td>

</tr>

<tr>

<td>notes</td>

<td></td>

</tr>

<tr bgcolor="#D4E4F3">

<td>new_number</td>

<td>1</td>

</tr>

<tr>

<td>elevation</td>

<td>1326</td>

</tr>

</table>

</td>

</tr>

</table>

</body>

</html>]]></description>
				<styleUrl>#IconStyle00</styleUrl>
				<Point>
					<coordinates>-113.6229824297953,42.47031710395123,0</coordinates>
				</Point>
			</Placemark>
			<Placemark id="ID_00239">
				<name>334</name>
				<Snippet maxLines="0"></Snippet>
				<description><![CDATA[<html xmlns:fo="http://www.w3.org/1999/XSL/Format" xmlns:msxsl="urn:schemas-microsoft-com:xslt">

<head>

<META http-equiv="Content-Type" content="text/html">

<meta http-equiv="content-type" content="text/html; charset=UTF-8">

</head>

<body style="margin:0px 0px 0px 0px;overflow:auto;background:#FFFFFF;">

<table style="font-family:Arial,Verdana,Times;font-size:12px;text-align:left;width:100%;border-collapse:collapse;padding:3px 3px 3px 3px">

<tr style="text-align:center;font-weight:bold;background:#9CBCE2">

<td>334</td>

</tr>

<tr>

<td>

<table style="font-family:Arial,Verdana,Times;font-size:12px;text-align:left;width:100%;border-spacing:0px; padding:3px 3px 3px 3px">

<tr>

<td>FID</td>

<td>239</td>

</tr>

<tr bgcolor="#D4E4F3">

<td>F1_for_irr</td>

<td>1</td>

</tr>

<tr>

<td>Name</td>

<td>334</td>

</tr>

<tr bgcolor="#D4E4F3">

<td>Name_2</td>

<td>334</td>

</tr>

<tr>

<td>Name_1</td>

<td>334</td>

</tr>

<tr bgcolor="#D4E4F3">

<td>F1_for_i_1</td>

<td>1</td>

</tr>

<tr>

<td>notes</td>

<td></td>

</tr>

<tr bgcolor="#D4E4F3">

<td>new_number</td>

<td>1</td>

</tr>

<tr>

<td>elevation</td>

<td>1332</td>

</tr>

</table>

</td>

</tr>

</table>

</body>

</html>]]></description>
				<styleUrl>#IconStyle00</styleUrl>
				<Point>
					<coordinates>-113.9662203295046,42.37754786204425,0</coordinates>
				</Point>
			</Placemark>
			<Placemark id="ID_00240">
				<name>335</name>
				<Snippet maxLines="0"></Snippet>
				<description><![CDATA[<html xmlns:fo="http://www.w3.org/1999/XSL/Format" xmlns:msxsl="urn:schemas-microsoft-com:xslt">

<head>

<META http-equiv="Content-Type" content="text/html">

<meta http-equiv="content-type" content="text/html; charset=UTF-8">

</head>

<body style="margin:0px 0px 0px 0px;overflow:auto;background:#FFFFFF;">

<table style="font-family:Arial,Verdana,Times;font-size:12px;text-align:left;width:100%;border-collapse:collapse;padding:3px 3px 3px 3px">

<tr style="text-align:center;font-weight:bold;background:#9CBCE2">

<td>335</td>

</tr>

<tr>

<td>

<table style="font-family:Arial,Verdana,Times;font-size:12px;text-align:left;width:100%;border-spacing:0px; padding:3px 3px 3px 3px">

<tr>

<td>FID</td>

<td>240</td>

</tr>

<tr bgcolor="#D4E4F3">

<td>F1_for_irr</td>

<td>1</td>

</tr>

<tr>

<td>Name</td>

<td>335</td>

</tr>

<tr bgcolor="#D4E4F3">

<td>Name_2</td>

<td>335</td>

</tr>

<tr>

<td>Name_1</td>

<td>335</td>

</tr>

<tr bgcolor="#D4E4F3">

<td>F1_for_i_1</td>

<td>1</td>

</tr>

<tr>

<td>notes</td>

<td></td>

</tr>

<tr bgcolor="#D4E4F3">

<td>new_number</td>

<td>1</td>

</tr>

<tr>

<td>elevation</td>

<td>1281</td>

</tr>

</table>

</td>

</tr>

</table>

</body>

</html>]]></description>
				<styleUrl>#IconStyle00</styleUrl>
				<Point>
					<coordinates>-113.6812426478299,42.50753659094096,0</coordinates>
				</Point>
			</Placemark>
			<Placemark id="ID_00241">
				<name>336</name>
				<Snippet maxLines="0"></Snippet>
				<description><![CDATA[<html xmlns:fo="http://www.w3.org/1999/XSL/Format" xmlns:msxsl="urn:schemas-microsoft-com:xslt">

<head>

<META http-equiv="Content-Type" content="text/html">

<meta http-equiv="content-type" content="text/html; charset=UTF-8">

</head>

<body style="margin:0px 0px 0px 0px;overflow:auto;background:#FFFFFF;">

<table style="font-family:Arial,Verdana,Times;font-size:12px;text-align:left;width:100%;border-collapse:collapse;padding:3px 3px 3px 3px">

<tr style="text-align:center;font-weight:bold;background:#9CBCE2">

<td>336</td>

</tr>

<tr>

<td>

<table style="font-family:Arial,Verdana,Times;font-size:12px;text-align:left;width:100%;border-spacing:0px; padding:3px 3px 3px 3px">

<tr>

<td>FID</td>

<td>241</td>

</tr>

<tr bgcolor="#D4E4F3">

<td>F1_for_irr</td>

<td>1</td>

</tr>

<tr>

<td>Name</td>

<td>336</td>

</tr>

<tr bgcolor="#D4E4F3">

<td>Name_2</td>

<td>336</td>

</tr>

<tr>

<td>Name_1</td>

<td>336</td>

</tr>

<tr bgcolor="#D4E4F3">

<td>F1_for_i_1</td>

<td>1</td>

</tr>

<tr>

<td>notes</td>

<td></td>

</tr>

<tr bgcolor="#D4E4F3">

<td>new_number</td>

<td>1</td>

</tr>

<tr>

<td>elevation</td>

<td>1304</td>

</tr>

</table>

</td>

</tr>

</table>

</body>

</html>]]></description>
				<styleUrl>#IconStyle00</styleUrl>
				<Point>
					<coordinates>-113.8674924737986,42.43516333182237,0</coordinates>
				</Point>
			</Placemark>
			<Placemark id="ID_00242">
				<name>337</name>
				<Snippet maxLines="0"></Snippet>
				<description><![CDATA[<html xmlns:fo="http://www.w3.org/1999/XSL/Format" xmlns:msxsl="urn:schemas-microsoft-com:xslt">

<head>

<META http-equiv="Content-Type" content="text/html">

<meta http-equiv="content-type" content="text/html; charset=UTF-8">

</head>

<body style="margin:0px 0px 0px 0px;overflow:auto;background:#FFFFFF;">

<table style="font-family:Arial,Verdana,Times;font-size:12px;text-align:left;width:100%;border-collapse:collapse;padding:3px 3px 3px 3px">

<tr style="text-align:center;font-weight:bold;background:#9CBCE2">

<td>337</td>

</tr>

<tr>

<td>

<table style="font-family:Arial,Verdana,Times;font-size:12px;text-align:left;width:100%;border-spacing:0px; padding:3px 3px 3px 3px">

<tr>

<td>FID</td>

<td>242</td>

</tr>

<tr bgcolor="#D4E4F3">

<td>F1_for_irr</td>

<td>0</td>

</tr>

<tr>

<td>Name</td>

<td>337</td>

</tr>

<tr bgcolor="#D4E4F3">

<td>Name_2</td>

<td>337</td>

</tr>

<tr>

<td>Name_1</td>

<td>337</td>

</tr>

<tr bgcolor="#D4E4F3">

<td>F1_for_i_1</td>

<td>0</td>

</tr>

<tr>

<td>notes</td>

<td>pasture</td>

</tr>

<tr bgcolor="#D4E4F3">

<td>new_number</td>

<td>2</td>

</tr>

<tr>

<td>elevation</td>

<td>1344</td>

</tr>

</table>

</td>

</tr>

</table>

</body>

</html>]]></description>
				<styleUrl>#IconStyle09</styleUrl>
				<Point>
					<coordinates>-113.966270409152,42.3486946421441,0</coordinates>
				</Point>
			</Placemark>
			<Placemark id="ID_00243">
				<name>338</name>
				<Snippet maxLines="0"></Snippet>
				<description><![CDATA[<html xmlns:fo="http://www.w3.org/1999/XSL/Format" xmlns:msxsl="urn:schemas-microsoft-com:xslt">

<head>

<META http-equiv="Content-Type" content="text/html">

<meta http-equiv="content-type" content="text/html; charset=UTF-8">

</head>

<body style="margin:0px 0px 0px 0px;overflow:auto;background:#FFFFFF;">

<table style="font-family:Arial,Verdana,Times;font-size:12px;text-align:left;width:100%;border-collapse:collapse;padding:3px 3px 3px 3px">

<tr style="text-align:center;font-weight:bold;background:#9CBCE2">

<td>338</td>

</tr>

<tr>

<td>

<table style="font-family:Arial,Verdana,Times;font-size:12px;text-align:left;width:100%;border-spacing:0px; padding:3px 3px 3px 3px">

<tr>

<td>FID</td>

<td>243</td>

</tr>

<tr bgcolor="#D4E4F3">

<td>F1_for_irr</td>

<td>0</td>

</tr>

<tr>

<td>Name</td>

<td>338</td>

</tr>

<tr bgcolor="#D4E4F3">

<td>Name_2</td>

<td>338</td>

</tr>

<tr>

<td>Name_1</td>

<td>338</td>

</tr>

<tr bgcolor="#D4E4F3">

<td>F1_for_i_1</td>

<td>0</td>

</tr>

<tr>

<td>notes</td>

<td>wheat</td>

</tr>

<tr bgcolor="#D4E4F3">

<td>new_number</td>

<td>2</td>

</tr>

<tr>

<td>elevation</td>

<td>1463</td>

</tr>

</table>

</td>

</tr>

</table>

</body>

</html>]]></description>
				<styleUrl>#IconStyle09</styleUrl>
				<Point>
					<coordinates>-113.7531642656184,42.33442789702986,0</coordinates>
				</Point>
			</Placemark>
			<Placemark id="ID_00244">
				<name>339</name>
				<Snippet maxLines="0"></Snippet>
				<description><![CDATA[<html xmlns:fo="http://www.w3.org/1999/XSL/Format" xmlns:msxsl="urn:schemas-microsoft-com:xslt">

<head>

<META http-equiv="Content-Type" content="text/html">

<meta http-equiv="content-type" content="text/html; charset=UTF-8">

</head>

<body style="margin:0px 0px 0px 0px;overflow:auto;background:#FFFFFF;">

<table style="font-family:Arial,Verdana,Times;font-size:12px;text-align:left;width:100%;border-collapse:collapse;padding:3px 3px 3px 3px">

<tr style="text-align:center;font-weight:bold;background:#9CBCE2">

<td>339</td>

</tr>

<tr>

<td>

<table style="font-family:Arial,Verdana,Times;font-size:12px;text-align:left;width:100%;border-spacing:0px; padding:3px 3px 3px 3px">

<tr>

<td>FID</td>

<td>244</td>

</tr>

<tr bgcolor="#D4E4F3">

<td>F1_for_irr</td>

<td>0</td>

</tr>

<tr>

<td>Name</td>

<td>339</td>

</tr>

<tr bgcolor="#D4E4F3">

<td>Name_2</td>

<td>339</td>

</tr>

<tr>

<td>Name_1</td>

<td>339</td>

</tr>

<tr bgcolor="#D4E4F3">

<td>F1_for_i_1</td>

<td>0</td>

</tr>

<tr>

<td>notes</td>

<td>wheat</td>

</tr>

<tr bgcolor="#D4E4F3">

<td>new_number</td>

<td>2</td>

</tr>

<tr>

<td>elevation</td>

<td>1508</td>

</tr>

</table>

</td>

</tr>

</table>

</body>

</html>]]></description>
				<styleUrl>#IconStyle09</styleUrl>
				<Point>
					<coordinates>-113.1584766484785,42.33862627678133,0</coordinates>
				</Point>
			</Placemark>
			<Placemark id="ID_00245">
				<name>340</name>
				<Snippet maxLines="0"></Snippet>
				<description><![CDATA[<html xmlns:fo="http://www.w3.org/1999/XSL/Format" xmlns:msxsl="urn:schemas-microsoft-com:xslt">

<head>

<META http-equiv="Content-Type" content="text/html">

<meta http-equiv="content-type" content="text/html; charset=UTF-8">

</head>

<body style="margin:0px 0px 0px 0px;overflow:auto;background:#FFFFFF;">

<table style="font-family:Arial,Verdana,Times;font-size:12px;text-align:left;width:100%;border-collapse:collapse;padding:3px 3px 3px 3px">

<tr style="text-align:center;font-weight:bold;background:#9CBCE2">

<td>340</td>

</tr>

<tr>

<td>

<table style="font-family:Arial,Verdana,Times;font-size:12px;text-align:left;width:100%;border-spacing:0px; padding:3px 3px 3px 3px">

<tr>

<td>FID</td>

<td>245</td>

</tr>

<tr bgcolor="#D4E4F3">

<td>F1_for_irr</td>

<td>0</td>

</tr>

<tr>

<td>Name</td>

<td>340</td>

</tr>

<tr bgcolor="#D4E4F3">

<td>Name_2</td>

<td>340</td>

</tr>

<tr>

<td>Name_1</td>

<td>340</td>

</tr>

<tr bgcolor="#D4E4F3">

<td>F1_for_i_1</td>

<td>0</td>

</tr>

<tr>

<td>notes</td>

<td>wheat</td>

</tr>

<tr bgcolor="#D4E4F3">

<td>new_number</td>

<td>2</td>

</tr>

<tr>

<td>elevation</td>

<td>1572</td>

</tr>

</table>

</td>

</tr>

</table>

</body>

</html>]]></description>
				<styleUrl>#IconStyle09</styleUrl>
				<Point>
					<coordinates>-113.156327192346,42.43190935982915,0</coordinates>
				</Point>
			</Placemark>
			<Placemark id="ID_00246">
				<name>341</name>
				<Snippet maxLines="0"></Snippet>
				<description><![CDATA[<html xmlns:fo="http://www.w3.org/1999/XSL/Format" xmlns:msxsl="urn:schemas-microsoft-com:xslt">

<head>

<META http-equiv="Content-Type" content="text/html">

<meta http-equiv="content-type" content="text/html; charset=UTF-8">

</head>

<body style="margin:0px 0px 0px 0px;overflow:auto;background:#FFFFFF;">

<table style="font-family:Arial,Verdana,Times;font-size:12px;text-align:left;width:100%;border-collapse:collapse;padding:3px 3px 3px 3px">

<tr style="text-align:center;font-weight:bold;background:#9CBCE2">

<td>341</td>

</tr>

<tr>

<td>

<table style="font-family:Arial,Verdana,Times;font-size:12px;text-align:left;width:100%;border-spacing:0px; padding:3px 3px 3px 3px">

<tr>

<td>FID</td>

<td>246</td>

</tr>

<tr bgcolor="#D4E4F3">

<td>F1_for_irr</td>

<td>0</td>

</tr>

<tr>

<td>Name</td>

<td>341</td>

</tr>

<tr bgcolor="#D4E4F3">

<td>Name_2</td>

<td>341</td>

</tr>

<tr>

<td>Name_1</td>

<td>341</td>

</tr>

<tr bgcolor="#D4E4F3">

<td>F1_for_i_1</td>

<td>0</td>

</tr>

<tr>

<td>notes</td>

<td>wheat</td>

</tr>

<tr bgcolor="#D4E4F3">

<td>new_number</td>

<td>2</td>

</tr>

<tr>

<td>elevation</td>

<td>1665</td>

</tr>

</table>

</td>

</tr>

</table>

</body>

</html>]]></description>
				<styleUrl>#IconStyle09</styleUrl>
				<Point>
					<coordinates>-113.0075781505112,42.13783882000558,0</coordinates>
				</Point>
			</Placemark>
			<Placemark id="ID_00247">
				<name>342</name>
				<Snippet maxLines="0"></Snippet>
				<description><![CDATA[<html xmlns:fo="http://www.w3.org/1999/XSL/Format" xmlns:msxsl="urn:schemas-microsoft-com:xslt">

<head>

<META http-equiv="Content-Type" content="text/html">

<meta http-equiv="content-type" content="text/html; charset=UTF-8">

</head>

<body style="margin:0px 0px 0px 0px;overflow:auto;background:#FFFFFF;">

<table style="font-family:Arial,Verdana,Times;font-size:12px;text-align:left;width:100%;border-collapse:collapse;padding:3px 3px 3px 3px">

<tr style="text-align:center;font-weight:bold;background:#9CBCE2">

<td>342</td>

</tr>

<tr>

<td>

<table style="font-family:Arial,Verdana,Times;font-size:12px;text-align:left;width:100%;border-spacing:0px; padding:3px 3px 3px 3px">

<tr>

<td>FID</td>

<td>247</td>

</tr>

<tr bgcolor="#D4E4F3">

<td>F1_for_irr</td>

<td>0</td>

</tr>

<tr>

<td>Name</td>

<td>342</td>

</tr>

<tr bgcolor="#D4E4F3">

<td>Name_2</td>

<td>342</td>

</tr>

<tr>

<td>Name_1</td>

<td>342</td>

</tr>

<tr bgcolor="#D4E4F3">

<td>F1_for_i_1</td>

<td>0</td>

</tr>

<tr>

<td>notes</td>

<td>wheat</td>

</tr>

<tr bgcolor="#D4E4F3">

<td>new_number</td>

<td>2</td>

</tr>

<tr>

<td>elevation</td>

<td>1652</td>

</tr>

</table>

</td>

</tr>

</table>

</body>

</html>]]></description>
				<styleUrl>#IconStyle09</styleUrl>
				<Point>
					<coordinates>-113.020475191277,42.17468045413972,0</coordinates>
				</Point>
			</Placemark>
			<Placemark id="ID_00248">
				<name>343</name>
				<Snippet maxLines="0"></Snippet>
				<description><![CDATA[<html xmlns:fo="http://www.w3.org/1999/XSL/Format" xmlns:msxsl="urn:schemas-microsoft-com:xslt">

<head>

<META http-equiv="Content-Type" content="text/html">

<meta http-equiv="content-type" content="text/html; charset=UTF-8">

</head>

<body style="margin:0px 0px 0px 0px;overflow:auto;background:#FFFFFF;">

<table style="font-family:Arial,Verdana,Times;font-size:12px;text-align:left;width:100%;border-collapse:collapse;padding:3px 3px 3px 3px">

<tr style="text-align:center;font-weight:bold;background:#9CBCE2">

<td>343</td>

</tr>

<tr>

<td>

<table style="font-family:Arial,Verdana,Times;font-size:12px;text-align:left;width:100%;border-spacing:0px; padding:3px 3px 3px 3px">

<tr>

<td>FID</td>

<td>248</td>

</tr>

<tr bgcolor="#D4E4F3">

<td>F1_for_irr</td>

<td>0</td>

</tr>

<tr>

<td>Name</td>

<td>343</td>

</tr>

<tr bgcolor="#D4E4F3">

<td>Name_2</td>

<td>343</td>

</tr>

<tr>

<td>Name_1</td>

<td>343</td>

</tr>

<tr bgcolor="#D4E4F3">

<td>F1_for_i_1</td>

<td>0</td>

</tr>

<tr>

<td>notes</td>

<td>wheat</td>

</tr>

<tr bgcolor="#D4E4F3">

<td>new_number</td>

<td>2</td>

</tr>

<tr>

<td>elevation</td>

<td>1622</td>

</tr>

</table>

</td>

</tr>

</table>

</body>

</html>]]></description>
				<styleUrl>#IconStyle09</styleUrl>
				<Point>
					<coordinates>-113.0894874833606,42.46911537767261,0</coordinates>
				</Point>
			</Placemark>
			<Placemark id="ID_00249">
				<name>344</name>
				<Snippet maxLines="0"></Snippet>
				<description><![CDATA[<html xmlns:fo="http://www.w3.org/1999/XSL/Format" xmlns:msxsl="urn:schemas-microsoft-com:xslt">

<head>

<META http-equiv="Content-Type" content="text/html">

<meta http-equiv="content-type" content="text/html; charset=UTF-8">

</head>

<body style="margin:0px 0px 0px 0px;overflow:auto;background:#FFFFFF;">

<table style="font-family:Arial,Verdana,Times;font-size:12px;text-align:left;width:100%;border-collapse:collapse;padding:3px 3px 3px 3px">

<tr style="text-align:center;font-weight:bold;background:#9CBCE2">

<td>344</td>

</tr>

<tr>

<td>

<table style="font-family:Arial,Verdana,Times;font-size:12px;text-align:left;width:100%;border-spacing:0px; padding:3px 3px 3px 3px">

<tr>

<td>FID</td>

<td>249</td>

</tr>

<tr bgcolor="#D4E4F3">

<td>F1_for_irr</td>

<td>0</td>

</tr>

<tr>

<td>Name</td>

<td>344</td>

</tr>

<tr bgcolor="#D4E4F3">

<td>Name_2</td>

<td>344</td>

</tr>

<tr>

<td>Name_1</td>

<td>344</td>

</tr>

<tr bgcolor="#D4E4F3">

<td>F1_for_i_1</td>

<td>0</td>

</tr>

<tr>

<td>notes</td>

<td>wheat</td>

</tr>

<tr bgcolor="#D4E4F3">

<td>new_number</td>

<td>2</td>

</tr>

<tr>

<td>elevation</td>

<td>1405</td>

</tr>

</table>

</td>

</tr>

</table>

</body>

</html>]]></description>
				<styleUrl>#IconStyle09</styleUrl>
				<Point>
					<coordinates>-113.1457800603015,42.54626798128237,0</coordinates>
				</Point>
			</Placemark>
			<Placemark id="ID_00250">
				<name>345</name>
				<Snippet maxLines="0"></Snippet>
				<description><![CDATA[<html xmlns:fo="http://www.w3.org/1999/XSL/Format" xmlns:msxsl="urn:schemas-microsoft-com:xslt">

<head>

<META http-equiv="Content-Type" content="text/html">

<meta http-equiv="content-type" content="text/html; charset=UTF-8">

</head>

<body style="margin:0px 0px 0px 0px;overflow:auto;background:#FFFFFF;">

<table style="font-family:Arial,Verdana,Times;font-size:12px;text-align:left;width:100%;border-collapse:collapse;padding:3px 3px 3px 3px">

<tr style="text-align:center;font-weight:bold;background:#9CBCE2">

<td>345</td>

</tr>

<tr>

<td>

<table style="font-family:Arial,Verdana,Times;font-size:12px;text-align:left;width:100%;border-spacing:0px; padding:3px 3px 3px 3px">

<tr>

<td>FID</td>

<td>250</td>

</tr>

<tr bgcolor="#D4E4F3">

<td>F1_for_irr</td>

<td>0</td>

</tr>

<tr>

<td>Name</td>

<td>345</td>

</tr>

<tr bgcolor="#D4E4F3">

<td>Name_2</td>

<td>345</td>

</tr>

<tr>

<td>Name_1</td>

<td>345</td>

</tr>

<tr bgcolor="#D4E4F3">

<td>F1_for_i_1</td>

<td>0</td>

</tr>

<tr>

<td>notes</td>

<td>wheat</td>

</tr>

<tr bgcolor="#D4E4F3">

<td>new_number</td>

<td>2</td>

</tr>

<tr>

<td>elevation</td>

<td>1416</td>

</tr>

</table>

</td>

</tr>

</table>

</body>

</html>]]></description>
				<styleUrl>#IconStyle09</styleUrl>
				<Point>
					<coordinates>-113.1995701360529,42.46289431202291,0</coordinates>
				</Point>
			</Placemark>
			<Placemark id="ID_00251">
				<name>346</name>
				<Snippet maxLines="0"></Snippet>
				<description><![CDATA[<html xmlns:fo="http://www.w3.org/1999/XSL/Format" xmlns:msxsl="urn:schemas-microsoft-com:xslt">

<head>

<META http-equiv="Content-Type" content="text/html">

<meta http-equiv="content-type" content="text/html; charset=UTF-8">

</head>

<body style="margin:0px 0px 0px 0px;overflow:auto;background:#FFFFFF;">

<table style="font-family:Arial,Verdana,Times;font-size:12px;text-align:left;width:100%;border-collapse:collapse;padding:3px 3px 3px 3px">

<tr style="text-align:center;font-weight:bold;background:#9CBCE2">

<td>346</td>

</tr>

<tr>

<td>

<table style="font-family:Arial,Verdana,Times;font-size:12px;text-align:left;width:100%;border-spacing:0px; padding:3px 3px 3px 3px">

<tr>

<td>FID</td>

<td>251</td>

</tr>

<tr bgcolor="#D4E4F3">

<td>F1_for_irr</td>

<td>1</td>

</tr>

<tr>

<td>Name</td>

<td>346</td>

</tr>

<tr bgcolor="#D4E4F3">

<td>Name_2</td>

<td>346</td>

</tr>

<tr>

<td>Name_1</td>

<td>346</td>

</tr>

<tr bgcolor="#D4E4F3">

<td>F1_for_i_1</td>

<td>1</td>

</tr>

<tr>

<td>notes</td>

<td></td>

</tr>

<tr bgcolor="#D4E4F3">

<td>new_number</td>

<td>1</td>

</tr>

<tr>

<td>elevation</td>

<td>1527</td>

</tr>

</table>

</td>

</tr>

</table>

</body>

</html>]]></description>
				<styleUrl>#IconStyle00</styleUrl>
				<Point>
					<coordinates>-112.5707593761443,44.098134810673,0</coordinates>
				</Point>
			</Placemark>
			<Placemark id="ID_00252">
				<name>347</name>
				<Snippet maxLines="0"></Snippet>
				<description><![CDATA[<html xmlns:fo="http://www.w3.org/1999/XSL/Format" xmlns:msxsl="urn:schemas-microsoft-com:xslt">

<head>

<META http-equiv="Content-Type" content="text/html">

<meta http-equiv="content-type" content="text/html; charset=UTF-8">

</head>

<body style="margin:0px 0px 0px 0px;overflow:auto;background:#FFFFFF;">

<table style="font-family:Arial,Verdana,Times;font-size:12px;text-align:left;width:100%;border-collapse:collapse;padding:3px 3px 3px 3px">

<tr style="text-align:center;font-weight:bold;background:#9CBCE2">

<td>347</td>

</tr>

<tr>

<td>

<table style="font-family:Arial,Verdana,Times;font-size:12px;text-align:left;width:100%;border-spacing:0px; padding:3px 3px 3px 3px">

<tr>

<td>FID</td>

<td>252</td>

</tr>

<tr bgcolor="#D4E4F3">

<td>F1_for_irr</td>

<td>1</td>

</tr>

<tr>

<td>Name</td>

<td>347</td>

</tr>

<tr bgcolor="#D4E4F3">

<td>Name_2</td>

<td>347</td>

</tr>

<tr>

<td>Name_1</td>

<td>347</td>

</tr>

<tr bgcolor="#D4E4F3">

<td>F1_for_i_1</td>

<td>1</td>

</tr>

<tr>

<td>notes</td>

<td></td>

</tr>

<tr bgcolor="#D4E4F3">

<td>new_number</td>

<td>1</td>

</tr>

<tr>

<td>elevation</td>

<td>1473</td>

</tr>

</table>

</td>

</tr>

</table>

</body>

</html>]]></description>
				<styleUrl>#IconStyle00</styleUrl>
				<Point>
					<coordinates>-112.5102020872565,44.07645235669094,0</coordinates>
				</Point>
			</Placemark>
			<Placemark id="ID_00253">
				<name>348</name>
				<Snippet maxLines="0"></Snippet>
				<description><![CDATA[<html xmlns:fo="http://www.w3.org/1999/XSL/Format" xmlns:msxsl="urn:schemas-microsoft-com:xslt">

<head>

<META http-equiv="Content-Type" content="text/html">

<meta http-equiv="content-type" content="text/html; charset=UTF-8">

</head>

<body style="margin:0px 0px 0px 0px;overflow:auto;background:#FFFFFF;">

<table style="font-family:Arial,Verdana,Times;font-size:12px;text-align:left;width:100%;border-collapse:collapse;padding:3px 3px 3px 3px">

<tr style="text-align:center;font-weight:bold;background:#9CBCE2">

<td>348</td>

</tr>

<tr>

<td>

<table style="font-family:Arial,Verdana,Times;font-size:12px;text-align:left;width:100%;border-spacing:0px; padding:3px 3px 3px 3px">

<tr>

<td>FID</td>

<td>253</td>

</tr>

<tr bgcolor="#D4E4F3">

<td>F1_for_irr</td>

<td>1</td>

</tr>

<tr>

<td>Name</td>

<td>348</td>

</tr>

<tr bgcolor="#D4E4F3">

<td>Name_2</td>

<td>348</td>

</tr>

<tr>

<td>Name_1</td>

<td>348</td>

</tr>

<tr bgcolor="#D4E4F3">

<td>F1_for_i_1</td>

<td>1</td>

</tr>

<tr>

<td>notes</td>

<td></td>

</tr>

<tr bgcolor="#D4E4F3">

<td>new_number</td>

<td>1</td>

</tr>

<tr>

<td>elevation</td>

<td>1493</td>

</tr>

</table>

</td>

</tr>

</table>

</body>

</html>]]></description>
				<styleUrl>#IconStyle00</styleUrl>
				<Point>
					<coordinates>-112.4604223016479,44.11960402460608,0</coordinates>
				</Point>
			</Placemark>
			<Placemark id="ID_00254">
				<name>349</name>
				<Snippet maxLines="0"></Snippet>
				<description><![CDATA[<html xmlns:fo="http://www.w3.org/1999/XSL/Format" xmlns:msxsl="urn:schemas-microsoft-com:xslt">

<head>

<META http-equiv="Content-Type" content="text/html">

<meta http-equiv="content-type" content="text/html; charset=UTF-8">

</head>

<body style="margin:0px 0px 0px 0px;overflow:auto;background:#FFFFFF;">

<table style="font-family:Arial,Verdana,Times;font-size:12px;text-align:left;width:100%;border-collapse:collapse;padding:3px 3px 3px 3px">

<tr style="text-align:center;font-weight:bold;background:#9CBCE2">

<td>349</td>

</tr>

<tr>

<td>

<table style="font-family:Arial,Verdana,Times;font-size:12px;text-align:left;width:100%;border-spacing:0px; padding:3px 3px 3px 3px">

<tr>

<td>FID</td>

<td>254</td>

</tr>

<tr bgcolor="#D4E4F3">

<td>F1_for_irr</td>

<td>1</td>

</tr>

<tr>

<td>Name</td>

<td>349</td>

</tr>

<tr bgcolor="#D4E4F3">

<td>Name_2</td>

<td>349</td>

</tr>

<tr>

<td>Name_1</td>

<td>349</td>

</tr>

<tr bgcolor="#D4E4F3">

<td>F1_for_i_1</td>

<td>1</td>

</tr>

<tr>

<td>notes</td>

<td></td>

</tr>

<tr bgcolor="#D4E4F3">

<td>new_number</td>

<td>1</td>

</tr>

<tr>

<td>elevation</td>

<td>1516</td>

</tr>

</table>

</td>

</tr>

</table>

</body>

</html>]]></description>
				<styleUrl>#IconStyle00</styleUrl>
				<Point>
					<coordinates>-112.4399413814895,44.15573280302647,0</coordinates>
				</Point>
			</Placemark>
			<Placemark id="ID_00255">
				<name>350</name>
				<Snippet maxLines="0"></Snippet>
				<description><![CDATA[<html xmlns:fo="http://www.w3.org/1999/XSL/Format" xmlns:msxsl="urn:schemas-microsoft-com:xslt">

<head>

<META http-equiv="Content-Type" content="text/html">

<meta http-equiv="content-type" content="text/html; charset=UTF-8">

</head>

<body style="margin:0px 0px 0px 0px;overflow:auto;background:#FFFFFF;">

<table style="font-family:Arial,Verdana,Times;font-size:12px;text-align:left;width:100%;border-collapse:collapse;padding:3px 3px 3px 3px">

<tr style="text-align:center;font-weight:bold;background:#9CBCE2">

<td>350</td>

</tr>

<tr>

<td>

<table style="font-family:Arial,Verdana,Times;font-size:12px;text-align:left;width:100%;border-spacing:0px; padding:3px 3px 3px 3px">

<tr>

<td>FID</td>

<td>255</td>

</tr>

<tr bgcolor="#D4E4F3">

<td>F1_for_irr</td>

<td>1</td>

</tr>

<tr>

<td>Name</td>

<td>350</td>

</tr>

<tr bgcolor="#D4E4F3">

<td>Name_2</td>

<td>350</td>

</tr>

<tr>

<td>Name_1</td>

<td>350</td>

</tr>

<tr bgcolor="#D4E4F3">

<td>F1_for_i_1</td>

<td>1</td>

</tr>

<tr>

<td>notes</td>

<td></td>

</tr>

<tr bgcolor="#D4E4F3">

<td>new_number</td>

<td>1</td>

</tr>

<tr>

<td>elevation</td>

<td>1521</td>

</tr>

</table>

</td>

</tr>

</table>

</body>

</html>]]></description>
				<styleUrl>#IconStyle00</styleUrl>
				<Point>
					<coordinates>-112.2536403175466,44.12706642087869,0</coordinates>
				</Point>
			</Placemark>
			<Placemark id="ID_00256">
				<name>351</name>
				<Snippet maxLines="0"></Snippet>
				<description><![CDATA[<html xmlns:fo="http://www.w3.org/1999/XSL/Format" xmlns:msxsl="urn:schemas-microsoft-com:xslt">

<head>

<META http-equiv="Content-Type" content="text/html">

<meta http-equiv="content-type" content="text/html; charset=UTF-8">

</head>

<body style="margin:0px 0px 0px 0px;overflow:auto;background:#FFFFFF;">

<table style="font-family:Arial,Verdana,Times;font-size:12px;text-align:left;width:100%;border-collapse:collapse;padding:3px 3px 3px 3px">

<tr style="text-align:center;font-weight:bold;background:#9CBCE2">

<td>351</td>

</tr>

<tr>

<td>

<table style="font-family:Arial,Verdana,Times;font-size:12px;text-align:left;width:100%;border-spacing:0px; padding:3px 3px 3px 3px">

<tr>

<td>FID</td>

<td>256</td>

</tr>

<tr bgcolor="#D4E4F3">

<td>F1_for_irr</td>

<td>1</td>

</tr>

<tr>

<td>Name</td>

<td>351</td>

</tr>

<tr bgcolor="#D4E4F3">

<td>Name_2</td>

<td>351</td>

</tr>

<tr>

<td>Name_1</td>

<td>351</td>

</tr>

<tr bgcolor="#D4E4F3">

<td>F1_for_i_1</td>

<td>1</td>

</tr>

<tr>

<td>notes</td>

<td></td>

</tr>

<tr bgcolor="#D4E4F3">

<td>new_number</td>

<td>1</td>

</tr>

<tr>

<td>elevation</td>

<td>1489</td>

</tr>

</table>

</td>

</tr>

</table>

</body>

</html>]]></description>
				<styleUrl>#IconStyle00</styleUrl>
				<Point>
					<coordinates>-112.2542258697281,44.06610775107191,0</coordinates>
				</Point>
			</Placemark>
			<Placemark id="ID_00257">
				<name>352</name>
				<Snippet maxLines="0"></Snippet>
				<description><![CDATA[<html xmlns:fo="http://www.w3.org/1999/XSL/Format" xmlns:msxsl="urn:schemas-microsoft-com:xslt">

<head>

<META http-equiv="Content-Type" content="text/html">

<meta http-equiv="content-type" content="text/html; charset=UTF-8">

</head>

<body style="margin:0px 0px 0px 0px;overflow:auto;background:#FFFFFF;">

<table style="font-family:Arial,Verdana,Times;font-size:12px;text-align:left;width:100%;border-collapse:collapse;padding:3px 3px 3px 3px">

<tr style="text-align:center;font-weight:bold;background:#9CBCE2">

<td>352</td>

</tr>

<tr>

<td>

<table style="font-family:Arial,Verdana,Times;font-size:12px;text-align:left;width:100%;border-spacing:0px; padding:3px 3px 3px 3px">

<tr>

<td>FID</td>

<td>257</td>

</tr>

<tr bgcolor="#D4E4F3">

<td>F1_for_irr</td>

<td>1</td>

</tr>

<tr>

<td>Name</td>

<td>352</td>

</tr>

<tr bgcolor="#D4E4F3">

<td>Name_2</td>

<td>352</td>

</tr>

<tr>

<td>Name_1</td>

<td>352</td>

</tr>

<tr bgcolor="#D4E4F3">

<td>F1_for_i_1</td>

<td>1</td>

</tr>

<tr>

<td>notes</td>

<td></td>

</tr>

<tr bgcolor="#D4E4F3">

<td>new_number</td>

<td>1</td>

</tr>

<tr>

<td>elevation</td>

<td>1489</td>

</tr>

</table>

</td>

</tr>

</table>

</body>

</html>]]></description>
				<styleUrl>#IconStyle00</styleUrl>
				<Point>
					<coordinates>-112.211702707414,44.07314813957504,0</coordinates>
				</Point>
			</Placemark>
			<Placemark id="ID_00258">
				<name>353</name>
				<Snippet maxLines="0"></Snippet>
				<description><![CDATA[<html xmlns:fo="http://www.w3.org/1999/XSL/Format" xmlns:msxsl="urn:schemas-microsoft-com:xslt">

<head>

<META http-equiv="Content-Type" content="text/html">

<meta http-equiv="content-type" content="text/html; charset=UTF-8">

</head>

<body style="margin:0px 0px 0px 0px;overflow:auto;background:#FFFFFF;">

<table style="font-family:Arial,Verdana,Times;font-size:12px;text-align:left;width:100%;border-collapse:collapse;padding:3px 3px 3px 3px">

<tr style="text-align:center;font-weight:bold;background:#9CBCE2">

<td>353</td>

</tr>

<tr>

<td>

<table style="font-family:Arial,Verdana,Times;font-size:12px;text-align:left;width:100%;border-spacing:0px; padding:3px 3px 3px 3px">

<tr>

<td>FID</td>

<td>258</td>

</tr>

<tr bgcolor="#D4E4F3">

<td>F1_for_irr</td>

<td>1</td>

</tr>

<tr>

<td>Name</td>

<td>353</td>

</tr>

<tr bgcolor="#D4E4F3">

<td>Name_2</td>

<td>353</td>

</tr>

<tr>

<td>Name_1</td>

<td>353</td>

</tr>

<tr bgcolor="#D4E4F3">

<td>F1_for_i_1</td>

<td>1</td>

</tr>

<tr>

<td>notes</td>

<td></td>

</tr>

<tr bgcolor="#D4E4F3">

<td>new_number</td>

<td>1</td>

</tr>

<tr>

<td>elevation</td>

<td>1674</td>

</tr>

</table>

</td>

</tr>

</table>

</body>

</html>]]></description>
				<styleUrl>#IconStyle00</styleUrl>
				<Point>
					<coordinates>-112.4123885381005,44.2639969581931,0</coordinates>
				</Point>
			</Placemark>
			<Placemark id="ID_00259">
				<name>354</name>
				<Snippet maxLines="0"></Snippet>
				<description><![CDATA[<html xmlns:fo="http://www.w3.org/1999/XSL/Format" xmlns:msxsl="urn:schemas-microsoft-com:xslt">

<head>

<META http-equiv="Content-Type" content="text/html">

<meta http-equiv="content-type" content="text/html; charset=UTF-8">

</head>

<body style="margin:0px 0px 0px 0px;overflow:auto;background:#FFFFFF;">

<table style="font-family:Arial,Verdana,Times;font-size:12px;text-align:left;width:100%;border-collapse:collapse;padding:3px 3px 3px 3px">

<tr style="text-align:center;font-weight:bold;background:#9CBCE2">

<td>354</td>

</tr>

<tr>

<td>

<table style="font-family:Arial,Verdana,Times;font-size:12px;text-align:left;width:100%;border-spacing:0px; padding:3px 3px 3px 3px">

<tr>

<td>FID</td>

<td>259</td>

</tr>

<tr bgcolor="#D4E4F3">

<td>F1_for_irr</td>

<td>1</td>

</tr>

<tr>

<td>Name</td>

<td>354</td>

</tr>

<tr bgcolor="#D4E4F3">

<td>Name_2</td>

<td>354</td>

</tr>

<tr>

<td>Name_1</td>

<td>354</td>

</tr>

<tr bgcolor="#D4E4F3">

<td>F1_for_i_1</td>

<td>1</td>

</tr>

<tr>

<td>notes</td>

<td></td>

</tr>

<tr bgcolor="#D4E4F3">

<td>new_number</td>

<td>1</td>

</tr>

<tr>

<td>elevation</td>

<td>1527</td>

</tr>

</table>

</td>

</tr>

</table>

</body>

</html>]]></description>
				<styleUrl>#IconStyle00</styleUrl>
				<Point>
					<coordinates>-112.1659229659721,44.08976749407464,0</coordinates>
				</Point>
			</Placemark>
			<Placemark id="ID_00260">
				<name>355</name>
				<Snippet maxLines="0"></Snippet>
				<description><![CDATA[<html xmlns:fo="http://www.w3.org/1999/XSL/Format" xmlns:msxsl="urn:schemas-microsoft-com:xslt">

<head>

<META http-equiv="Content-Type" content="text/html">

<meta http-equiv="content-type" content="text/html; charset=UTF-8">

</head>

<body style="margin:0px 0px 0px 0px;overflow:auto;background:#FFFFFF;">

<table style="font-family:Arial,Verdana,Times;font-size:12px;text-align:left;width:100%;border-collapse:collapse;padding:3px 3px 3px 3px">

<tr style="text-align:center;font-weight:bold;background:#9CBCE2">

<td>355</td>

</tr>

<tr>

<td>

<table style="font-family:Arial,Verdana,Times;font-size:12px;text-align:left;width:100%;border-spacing:0px; padding:3px 3px 3px 3px">

<tr>

<td>FID</td>

<td>260</td>

</tr>

<tr bgcolor="#D4E4F3">

<td>F1_for_irr</td>

<td>1</td>

</tr>

<tr>

<td>Name</td>

<td>355</td>

</tr>

<tr bgcolor="#D4E4F3">

<td>Name_2</td>

<td>355</td>

</tr>

<tr>

<td>Name_1</td>

<td>355</td>

</tr>

<tr bgcolor="#D4E4F3">

<td>F1_for_i_1</td>

<td>1</td>

</tr>

<tr>

<td>notes</td>

<td></td>

</tr>

<tr bgcolor="#D4E4F3">

<td>new_number</td>

<td>1</td>

</tr>

<tr>

<td>elevation</td>

<td>1510</td>

</tr>

</table>

</td>

</tr>

</table>

</body>

</html>]]></description>
				<styleUrl>#IconStyle00</styleUrl>
				<Point>
					<coordinates>-112.6497875059886,44.0683183098422,0</coordinates>
				</Point>
			</Placemark>
			<Placemark id="ID_00261">
				<name>356</name>
				<Snippet maxLines="0"></Snippet>
				<description><![CDATA[<html xmlns:fo="http://www.w3.org/1999/XSL/Format" xmlns:msxsl="urn:schemas-microsoft-com:xslt">

<head>

<META http-equiv="Content-Type" content="text/html">

<meta http-equiv="content-type" content="text/html; charset=UTF-8">

</head>

<body style="margin:0px 0px 0px 0px;overflow:auto;background:#FFFFFF;">

<table style="font-family:Arial,Verdana,Times;font-size:12px;text-align:left;width:100%;border-collapse:collapse;padding:3px 3px 3px 3px">

<tr style="text-align:center;font-weight:bold;background:#9CBCE2">

<td>356</td>

</tr>

<tr>

<td>

<table style="font-family:Arial,Verdana,Times;font-size:12px;text-align:left;width:100%;border-spacing:0px; padding:3px 3px 3px 3px">

<tr>

<td>FID</td>

<td>261</td>

</tr>

<tr bgcolor="#D4E4F3">

<td>F1_for_irr</td>

<td>0</td>

</tr>

<tr>

<td>Name</td>

<td>356</td>

</tr>

<tr bgcolor="#D4E4F3">

<td>Name_2</td>

<td>356</td>

</tr>

<tr>

<td>Name_1</td>

<td>356</td>

</tr>

<tr bgcolor="#D4E4F3">

<td>F1_for_i_1</td>

<td>0</td>

</tr>

<tr>

<td>notes</td>

<td></td>

</tr>

<tr bgcolor="#D4E4F3">

<td>new_number</td>

<td>0</td>

</tr>

<tr>

<td>elevation</td>

<td>1546</td>

</tr>

</table>

</td>

</tr>

</table>

</body>

</html>]]></description>
				<styleUrl>#IconStyle09</styleUrl>
				<Point>
					<coordinates>-112.6110019782586,44.09313571414197,0</coordinates>
				</Point>
			</Placemark>
			<Placemark id="ID_00262">
				<name>357</name>
				<Snippet maxLines="0"></Snippet>
				<description><![CDATA[<html xmlns:fo="http://www.w3.org/1999/XSL/Format" xmlns:msxsl="urn:schemas-microsoft-com:xslt">

<head>

<META http-equiv="Content-Type" content="text/html">

<meta http-equiv="content-type" content="text/html; charset=UTF-8">

</head>

<body style="margin:0px 0px 0px 0px;overflow:auto;background:#FFFFFF;">

<table style="font-family:Arial,Verdana,Times;font-size:12px;text-align:left;width:100%;border-collapse:collapse;padding:3px 3px 3px 3px">

<tr style="text-align:center;font-weight:bold;background:#9CBCE2">

<td>357</td>

</tr>

<tr>

<td>

<table style="font-family:Arial,Verdana,Times;font-size:12px;text-align:left;width:100%;border-spacing:0px; padding:3px 3px 3px 3px">

<tr>

<td>FID</td>

<td>262</td>

</tr>

<tr bgcolor="#D4E4F3">

<td>F1_for_irr</td>

<td>0</td>

</tr>

<tr>

<td>Name</td>

<td>357</td>

</tr>

<tr bgcolor="#D4E4F3">

<td>Name_2</td>

<td>357</td>

</tr>

<tr>

<td>Name_1</td>

<td>357</td>

</tr>

<tr bgcolor="#D4E4F3">

<td>F1_for_i_1</td>

<td>0</td>

</tr>

<tr>

<td>notes</td>

<td>wheat</td>

</tr>

<tr bgcolor="#D4E4F3">

<td>new_number</td>

<td>2</td>

</tr>

<tr>

<td>elevation</td>

<td>1879</td>

</tr>

</table>

</td>

</tr>

</table>

</body>

</html>]]></description>
				<styleUrl>#IconStyle09</styleUrl>
				<Point>
					<coordinates>-112.923485523638,44.17716166348004,0</coordinates>
				</Point>
			</Placemark>
			<Placemark id="ID_00263">
				<name>358</name>
				<Snippet maxLines="0"></Snippet>
				<description><![CDATA[<html xmlns:fo="http://www.w3.org/1999/XSL/Format" xmlns:msxsl="urn:schemas-microsoft-com:xslt">

<head>

<META http-equiv="Content-Type" content="text/html">

<meta http-equiv="content-type" content="text/html; charset=UTF-8">

</head>

<body style="margin:0px 0px 0px 0px;overflow:auto;background:#FFFFFF;">

<table style="font-family:Arial,Verdana,Times;font-size:12px;text-align:left;width:100%;border-collapse:collapse;padding:3px 3px 3px 3px">

<tr style="text-align:center;font-weight:bold;background:#9CBCE2">

<td>358</td>

</tr>

<tr>

<td>

<table style="font-family:Arial,Verdana,Times;font-size:12px;text-align:left;width:100%;border-spacing:0px; padding:3px 3px 3px 3px">

<tr>

<td>FID</td>

<td>263</td>

</tr>

<tr bgcolor="#D4E4F3">

<td>F1_for_irr</td>

<td>0</td>

</tr>

<tr>

<td>Name</td>

<td>358</td>

</tr>

<tr bgcolor="#D4E4F3">

<td>Name_2</td>

<td>358</td>

</tr>

<tr>

<td>Name_1</td>

<td>358</td>

</tr>

<tr bgcolor="#D4E4F3">

<td>F1_for_i_1</td>

<td>0</td>

</tr>

<tr>

<td>notes</td>

<td>pasture</td>

</tr>

<tr bgcolor="#D4E4F3">

<td>new_number</td>

<td>2</td>

</tr>

<tr>

<td>elevation</td>

<td>1917</td>

</tr>

</table>

</td>

</tr>

</table>

</body>

</html>]]></description>
				<styleUrl>#IconStyle09</styleUrl>
				<Point>
					<coordinates>-112.9288281297144,44.1560853480604,0</coordinates>
				</Point>
			</Placemark>
			<Placemark id="ID_00264">
				<name>361</name>
				<Snippet maxLines="0"></Snippet>
				<description><![CDATA[<html xmlns:fo="http://www.w3.org/1999/XSL/Format" xmlns:msxsl="urn:schemas-microsoft-com:xslt">

<head>

<META http-equiv="Content-Type" content="text/html">

<meta http-equiv="content-type" content="text/html; charset=UTF-8">

</head>

<body style="margin:0px 0px 0px 0px;overflow:auto;background:#FFFFFF;">

<table style="font-family:Arial,Verdana,Times;font-size:12px;text-align:left;width:100%;border-collapse:collapse;padding:3px 3px 3px 3px">

<tr style="text-align:center;font-weight:bold;background:#9CBCE2">

<td>361</td>

</tr>

<tr>

<td>

<table style="font-family:Arial,Verdana,Times;font-size:12px;text-align:left;width:100%;border-spacing:0px; padding:3px 3px 3px 3px">

<tr>

<td>FID</td>

<td>264</td>

</tr>

<tr bgcolor="#D4E4F3">

<td>F1_for_irr</td>

<td>0</td>

</tr>

<tr>

<td>Name</td>

<td>361</td>

</tr>

<tr bgcolor="#D4E4F3">

<td>Name_2</td>

<td>361</td>

</tr>

<tr>

<td>Name_1</td>

<td>361</td>

</tr>

<tr bgcolor="#D4E4F3">

<td>F1_for_i_1</td>

<td>0</td>

</tr>

<tr>

<td>notes</td>

<td></td>

</tr>

<tr bgcolor="#D4E4F3">

<td>new_number</td>

<td>0</td>

</tr>

<tr>

<td>elevation</td>

<td>1650</td>

</tr>

</table>

</td>

</tr>

</table>

</body>

</html>]]></description>
				<styleUrl>#IconStyle09</styleUrl>
				<Point>
					<coordinates>-112.3977471084423,44.24514467069008,0</coordinates>
				</Point>
			</Placemark>
			<Placemark id="ID_00265">
				<name>363</name>
				<Snippet maxLines="0"></Snippet>
				<description><![CDATA[<html xmlns:fo="http://www.w3.org/1999/XSL/Format" xmlns:msxsl="urn:schemas-microsoft-com:xslt">

<head>

<META http-equiv="Content-Type" content="text/html">

<meta http-equiv="content-type" content="text/html; charset=UTF-8">

</head>

<body style="margin:0px 0px 0px 0px;overflow:auto;background:#FFFFFF;">

<table style="font-family:Arial,Verdana,Times;font-size:12px;text-align:left;width:100%;border-collapse:collapse;padding:3px 3px 3px 3px">

<tr style="text-align:center;font-weight:bold;background:#9CBCE2">

<td>363</td>

</tr>

<tr>

<td>

<table style="font-family:Arial,Verdana,Times;font-size:12px;text-align:left;width:100%;border-spacing:0px; padding:3px 3px 3px 3px">

<tr>

<td>FID</td>

<td>265</td>

</tr>

<tr bgcolor="#D4E4F3">

<td>F1_for_irr</td>

<td>0</td>

</tr>

<tr>

<td>Name</td>

<td>363</td>

</tr>

<tr bgcolor="#D4E4F3">

<td>Name_2</td>

<td>363</td>

</tr>

<tr>

<td>Name_1</td>

<td>363</td>

</tr>

<tr bgcolor="#D4E4F3">

<td>F1_for_i_1</td>

<td>0</td>

</tr>

<tr>

<td>notes</td>

<td>pasture</td>

</tr>

<tr bgcolor="#D4E4F3">

<td>new_number</td>

<td>2</td>

</tr>

<tr>

<td>elevation</td>

<td>1770</td>

</tr>

</table>

</td>

</tr>

</table>

</body>

</html>]]></description>
				<styleUrl>#IconStyle09</styleUrl>
				<Point>
					<coordinates>-112.1884120758566,44.32960398713436,0</coordinates>
				</Point>
			</Placemark>
			<Placemark id="ID_00266">
				<name>364</name>
				<Snippet maxLines="0"></Snippet>
				<description><![CDATA[<html xmlns:fo="http://www.w3.org/1999/XSL/Format" xmlns:msxsl="urn:schemas-microsoft-com:xslt">

<head>

<META http-equiv="Content-Type" content="text/html">

<meta http-equiv="content-type" content="text/html; charset=UTF-8">

</head>

<body style="margin:0px 0px 0px 0px;overflow:auto;background:#FFFFFF;">

<table style="font-family:Arial,Verdana,Times;font-size:12px;text-align:left;width:100%;border-collapse:collapse;padding:3px 3px 3px 3px">

<tr style="text-align:center;font-weight:bold;background:#9CBCE2">

<td>364</td>

</tr>

<tr>

<td>

<table style="font-family:Arial,Verdana,Times;font-size:12px;text-align:left;width:100%;border-spacing:0px; padding:3px 3px 3px 3px">

<tr>

<td>FID</td>

<td>266</td>

</tr>

<tr bgcolor="#D4E4F3">

<td>F1_for_irr</td>

<td>0</td>

</tr>

<tr>

<td>Name</td>

<td>364</td>

</tr>

<tr bgcolor="#D4E4F3">

<td>Name_2</td>

<td>364</td>

</tr>

<tr>

<td>Name_1</td>

<td>364</td>

</tr>

<tr bgcolor="#D4E4F3">

<td>F1_for_i_1</td>

<td>0</td>

</tr>

<tr>

<td>notes</td>

<td>pasture</td>

</tr>

<tr bgcolor="#D4E4F3">

<td>new_number</td>

<td>2</td>

</tr>

<tr>

<td>elevation</td>

<td>1559</td>

</tr>

</table>

</td>

</tr>

</table>

</body>

</html>]]></description>
				<styleUrl>#IconStyle09</styleUrl>
				<Point>
					<coordinates>-112.2028060948254,44.17021619751955,0</coordinates>
				</Point>
			</Placemark>
			<Placemark id="ID_00267">
				<name>366</name>
				<Snippet maxLines="0"></Snippet>
				<description><![CDATA[<html xmlns:fo="http://www.w3.org/1999/XSL/Format" xmlns:msxsl="urn:schemas-microsoft-com:xslt">

<head>

<META http-equiv="Content-Type" content="text/html">

<meta http-equiv="content-type" content="text/html; charset=UTF-8">

</head>

<body style="margin:0px 0px 0px 0px;overflow:auto;background:#FFFFFF;">

<table style="font-family:Arial,Verdana,Times;font-size:12px;text-align:left;width:100%;border-collapse:collapse;padding:3px 3px 3px 3px">

<tr style="text-align:center;font-weight:bold;background:#9CBCE2">

<td>366</td>

</tr>

<tr>

<td>

<table style="font-family:Arial,Verdana,Times;font-size:12px;text-align:left;width:100%;border-spacing:0px; padding:3px 3px 3px 3px">

<tr>

<td>FID</td>

<td>267</td>

</tr>

<tr bgcolor="#D4E4F3">

<td>F1_for_irr</td>

<td>1</td>

</tr>

<tr>

<td>Name</td>

<td>366</td>

</tr>

<tr bgcolor="#D4E4F3">

<td>Name_2</td>

<td>366</td>

</tr>

<tr>

<td>Name_1</td>

<td>366</td>

</tr>

<tr bgcolor="#D4E4F3">

<td>F1_for_i_1</td>

<td>1</td>

</tr>

<tr>

<td>notes</td>

<td></td>

</tr>

<tr bgcolor="#D4E4F3">

<td>new_number</td>

<td>1</td>

</tr>

<tr>

<td>elevation</td>

<td>1486</td>

</tr>

</table>

</td>

</tr>

</table>

</body>

</html>]]></description>
				<styleUrl>#IconStyle00</styleUrl>
				<Point>
					<coordinates>-111.872693100706,43.95274955075121,0</coordinates>
				</Point>
			</Placemark>
			<Placemark id="ID_00268">
[truncated: 967,274 more chars]
