# Supplementary material
Source: MDPI journal article supplement (https://www.mdpi.com/2072-4292/9/6/546)

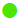

Supplement: s1 [file s1 › files/Layer0_Symbol_167545a8_0.png]

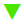

Supplement: s1 [file s1 › files/Layer0_Symbol_16e5ddd0_180.png]

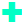

Supplement: s1 [file s1 › files/Layer0_Symbol_16e5d388_0.png]

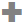

Supplement: s1 [file s1 › files/Layer0_Symbol_16e5dc58_0.png]

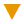

Supplement: s1 [file s1 › files/Layer0_Symbol_16e5cda8_180.png]

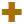

Supplement: s1 [file s1 › files/Layer0_Symbol_16e5d678_0.png]

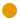

Supplement: s1 [file s1 › files/Layer0_Symbol_167542b8_0.png]

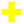

Supplement: s1 [file s1 › files/Layer0_Symbol_16e5cc30_0.png]

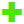

Supplement: s1 [file s1 › files/Layer0_Symbol_16e5d210_0.png]
